# Supplementary material for: Computational insights into the dual reactivity of 1,2,3,4-tetrazole: a metalloporphyrin-catalyzed click reaction and denitrogenative annulation
Source: Royal Society of Chemistry journal article supplement (doi:10.1039/d3qo00777d), 2023-01-01
Supplement: d3qo00777d1.pdf [file d3qo00777d1.pdf]

## *Supporting Information*

# **Computational Insights into the Dual Reactivity of 1,2,3,4-Tetrazole: Metalloporphyrin-Catalyzed Click Reaction and Denitrogenative Annulation**

Debo Ding, Xiahe Chen, Xingxing Su, Yuan-Bin She\* and Yun-Fang Yang\*

College of Chemical Engineering, Zhejiang University of Technology, Hangzhou, Zhejiang 310014, China

\*E-mail: yangyf@zjut.edu.cn

\*E-mail: sheyb@zjut.edu.cn

## **Table of Contents**

|                                                                                                                                    |     |
|------------------------------------------------------------------------------------------------------------------------------------|-----|
| Free energy profiles for Mn-porphyrin catalyzed click reaction of 1,2,3,4-tetrazole and phenylacetylene. ....                      | S2  |
| Free energy profiles for Mn-porphyrin catalyzed denitrogenative annulation of <b>1</b> . ....                                      | S3  |
| Different conformers for the tetrazole ring-opening transition structures. ....                                                    | S3  |
| Different conformers for the azide complex structures. ....                                                                        | S4  |
| Different conformers for the 1,5-regioisomer of tetrazole click reaction transition structures. ....                               | S5  |
| Different conformers for the 1,4-regioisomer of tetrazole click reaction transition structures. ....                               | S6  |
| Free energy profiles for Fe-porphyrin catalyzed click reaction of 1,2,3,4-tetrazole and phenylacetylene. ....                      | S7  |
| Free energy profiles for Fe-porphyrin catalyzed denitrogenative annulation of <b>1</b> . ....                                      | S8  |
| M–N bond orders and spin densities ( $\rho$ ) in <b><sup>6</sup>INT4</b> and <b><sup>5</sup>INT9</b> . ....                        | S9  |
| Populations of Mulliken charges (Q in e) and spin densities ( $\rho$ ) for the key structures of the denitrogenation process. .... | S9  |
| SNOs of Fe-nitrene specie <b><sup>5</sup>INT9</b> and their occupancies. ....                                                      | S10 |
| SNOs of Mn-nitrene specie <b><sup>6</sup>INT4</b> and their occupancies. ....                                                      | S10 |
| Electronic energies and free energies of the calculated structures. ....                                                           | S11 |
| Cartesian coordinates of the structures. ....                                                                                      | S14 |

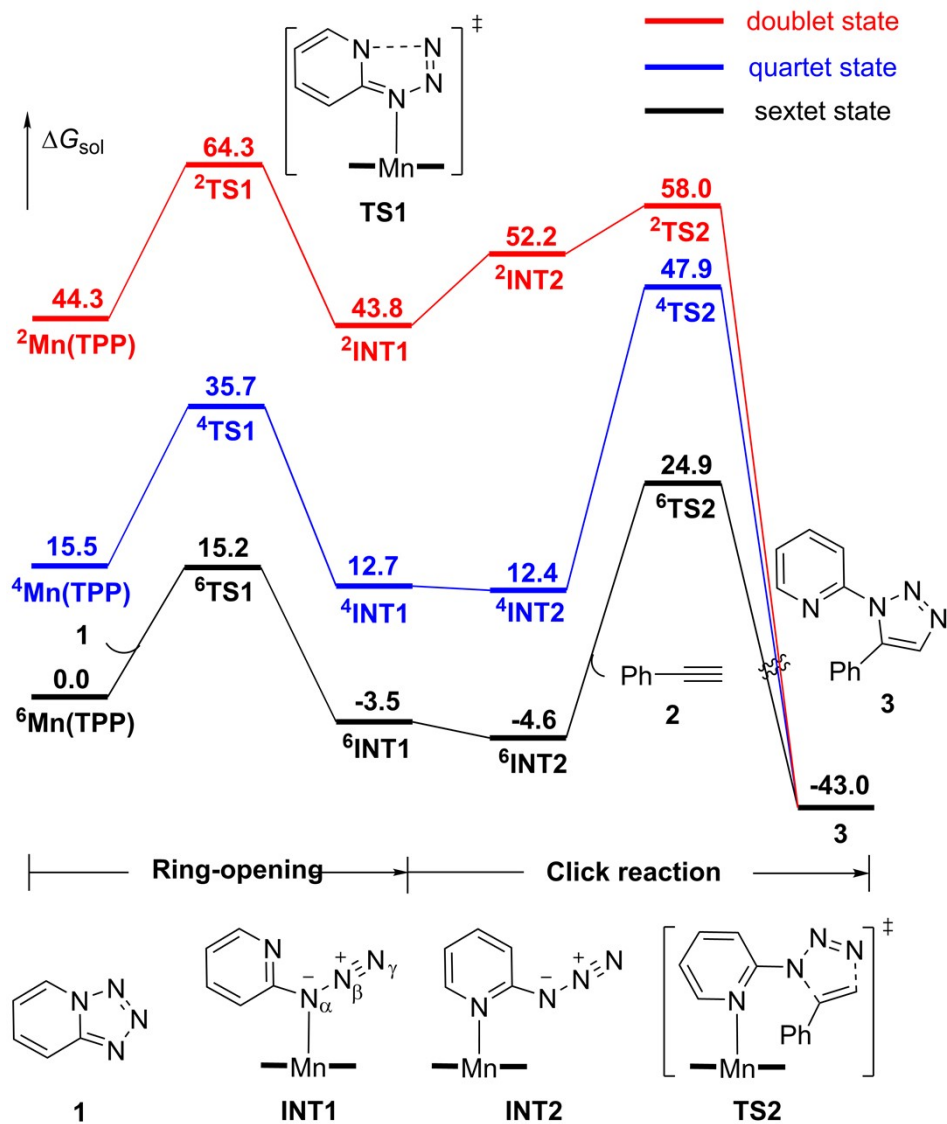

**Fig. S1** Free energy profiles for Mn-porphyrin catalyzed click reaction of 1,2,3,4-tetrazole **1** and phenylacetylene **2**. The energies are shown in kcal mol<sup>-1</sup>.

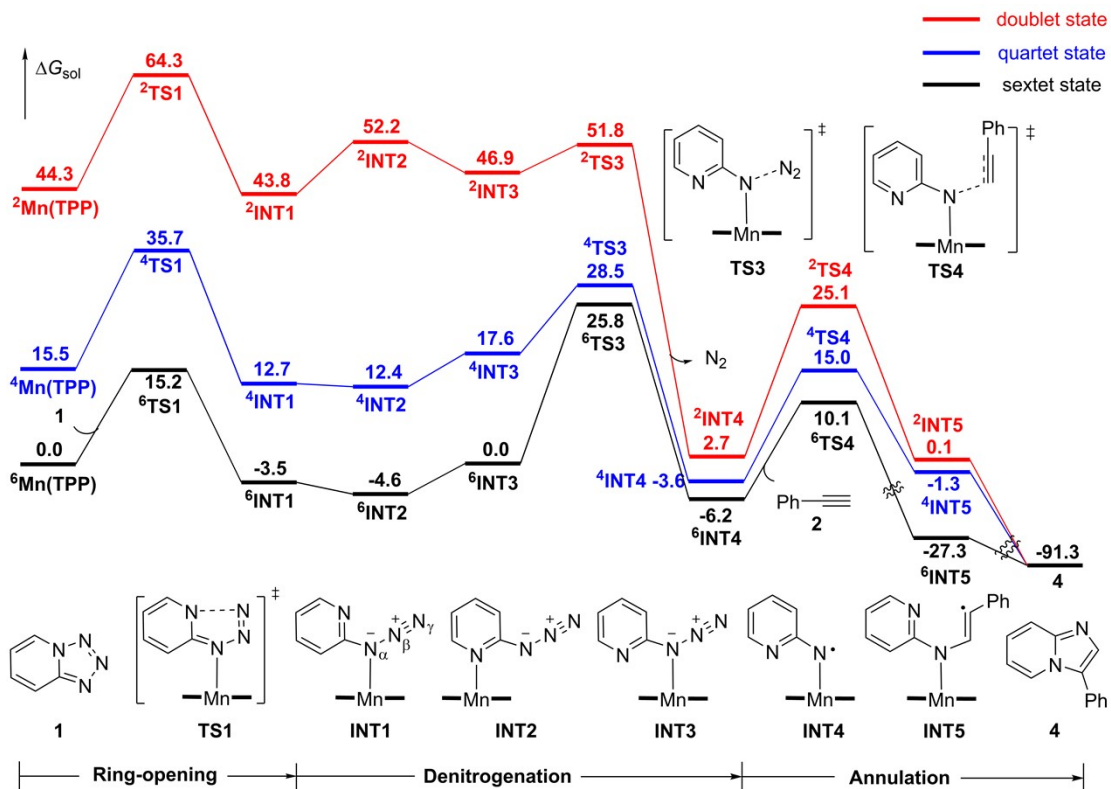

**Fig. S2** Free energy profiles for Mn-porphyrin catalyzed denitrogenative annulation of **1**. The energies are shown in kcal mol<sup>-1</sup>.

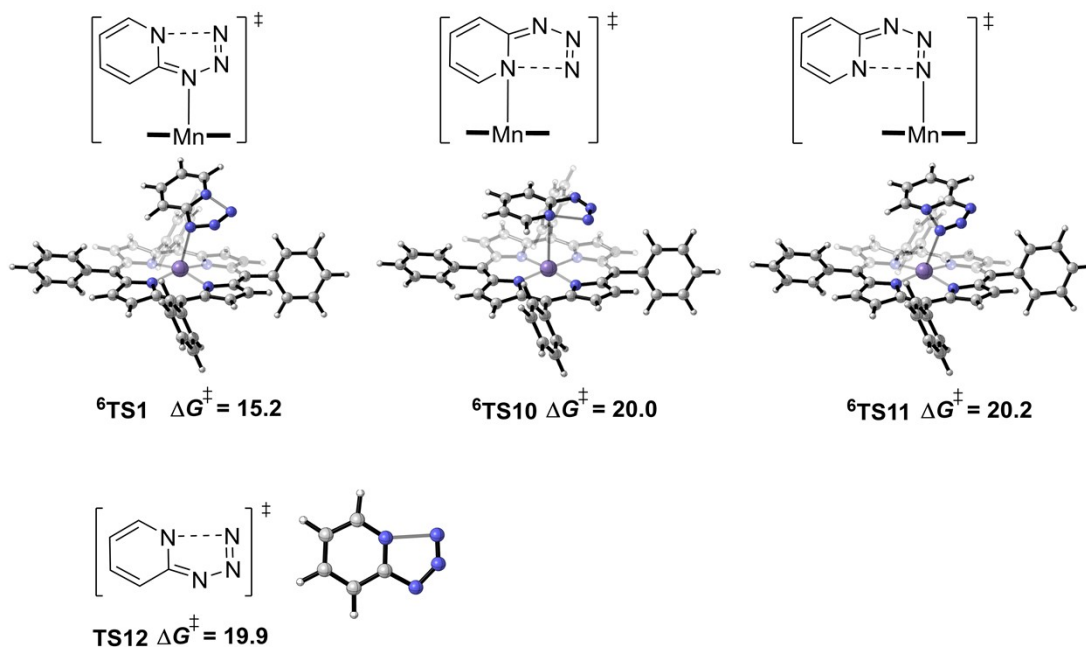

**Fig. S3** Different conformers for the tetrazole ring-opening transition structures. The energies are shown in kcal mol<sup>-1</sup>.

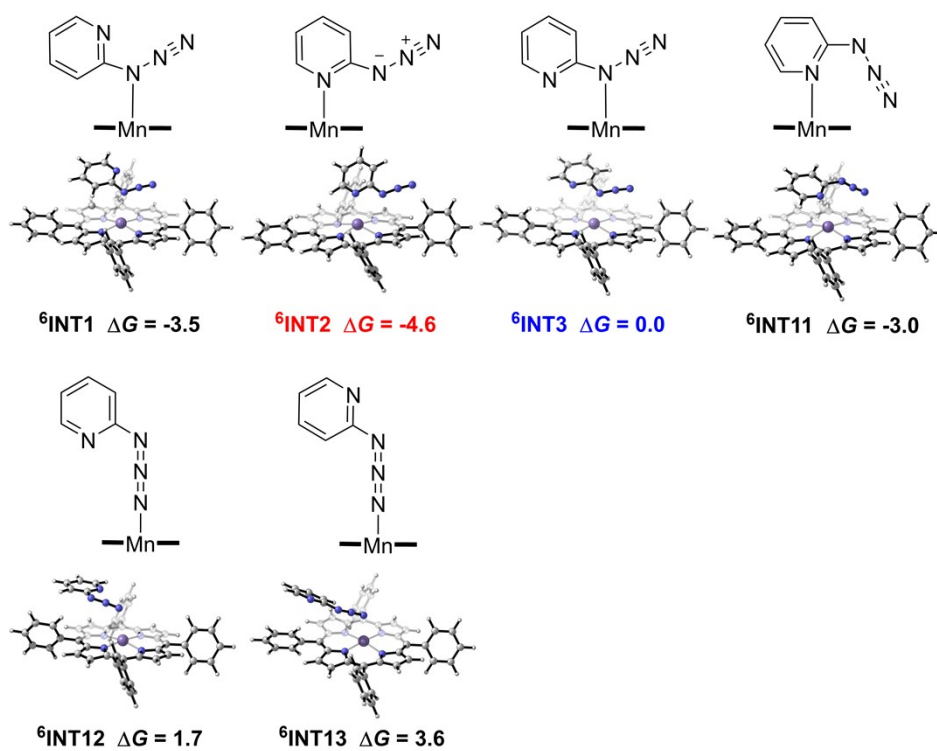

**Fig. S4** Different conformers for the azide complex structures. The energies are shown in kcal mol<sup>-1</sup>.

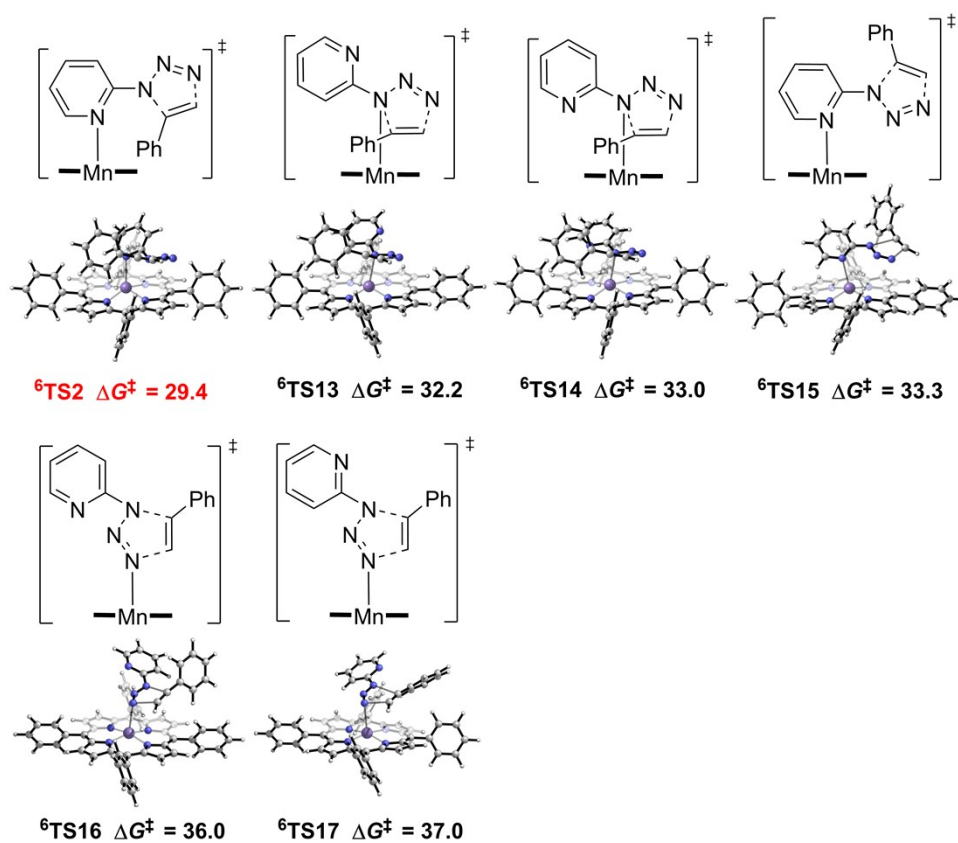

**Fig. S5** Different conformers for the 1,5-regioisomer of tetrazole click reaction transition structures. The energies are shown in kcal mol<sup>-1</sup>.

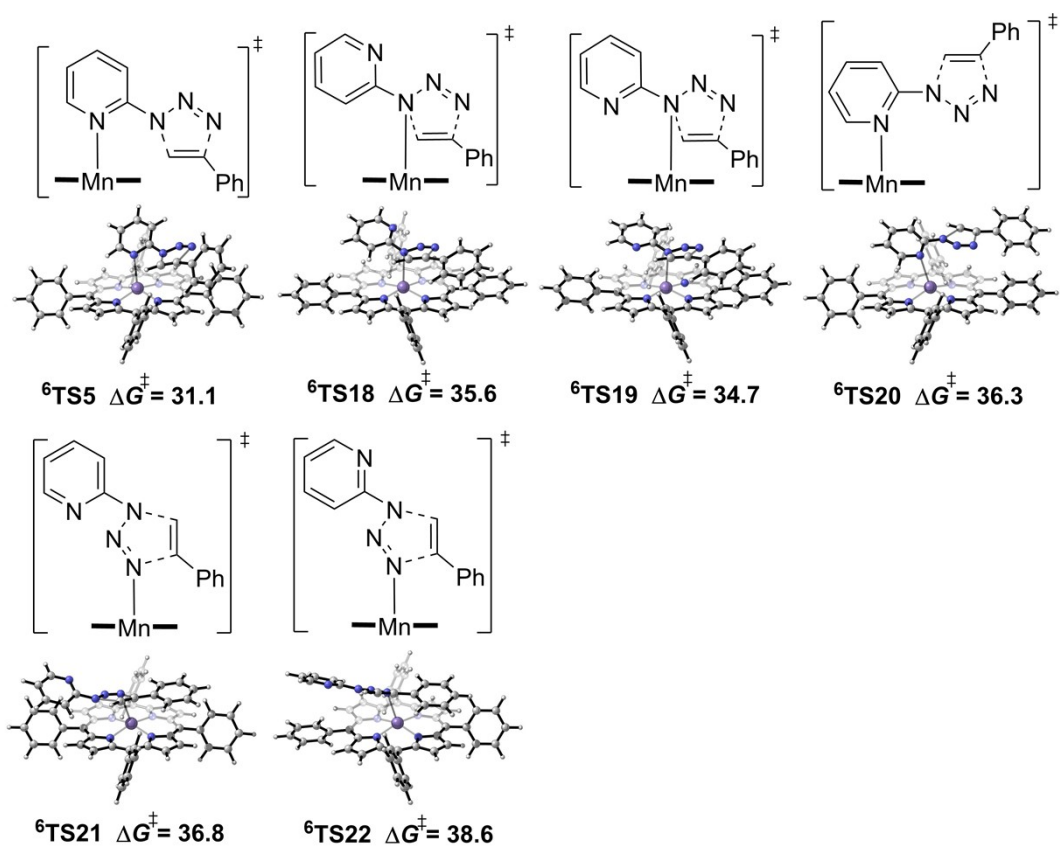

**Fig. S6** Different conformers for the 1,4-regioisomer of tetrazole click reaction transition structures. The energies are shown in kcal mol<sup>-1</sup>.

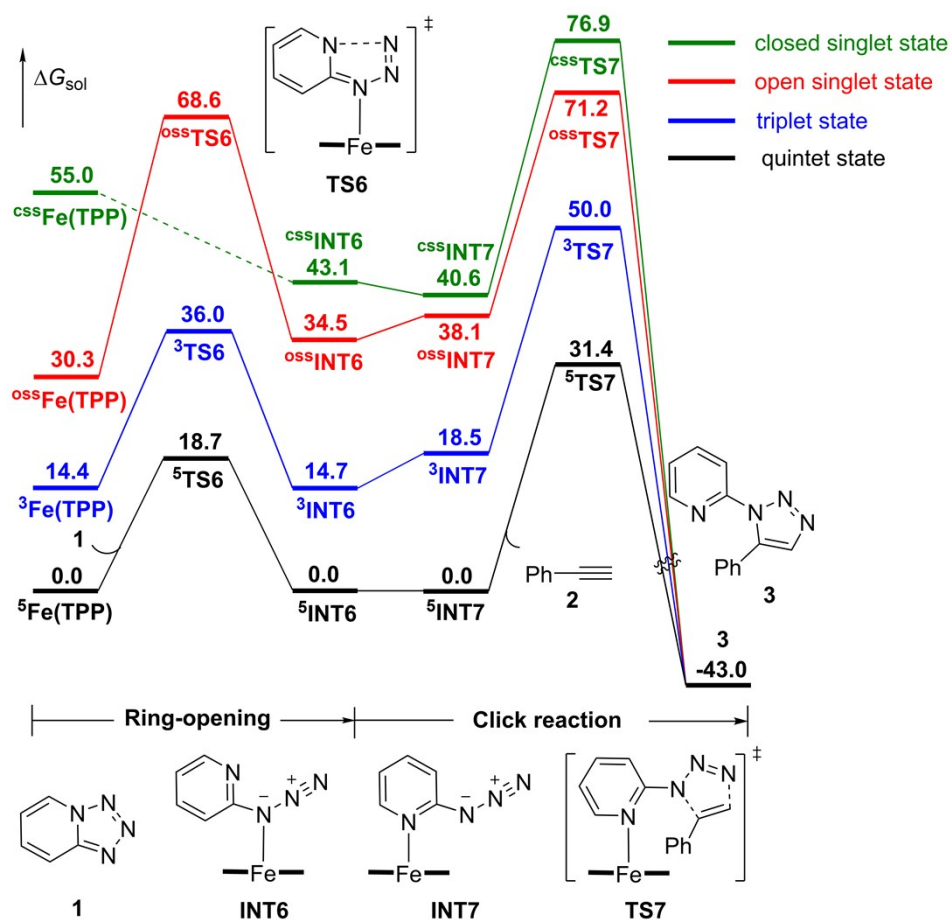

**Fig. S7** Free energy profiles for Fe-porphyrin catalyzed click reaction of 1,2,3,4-tetrazole **1** and phenylacetylene **2**. The energies are shown in kcal mol<sup>-1</sup>.

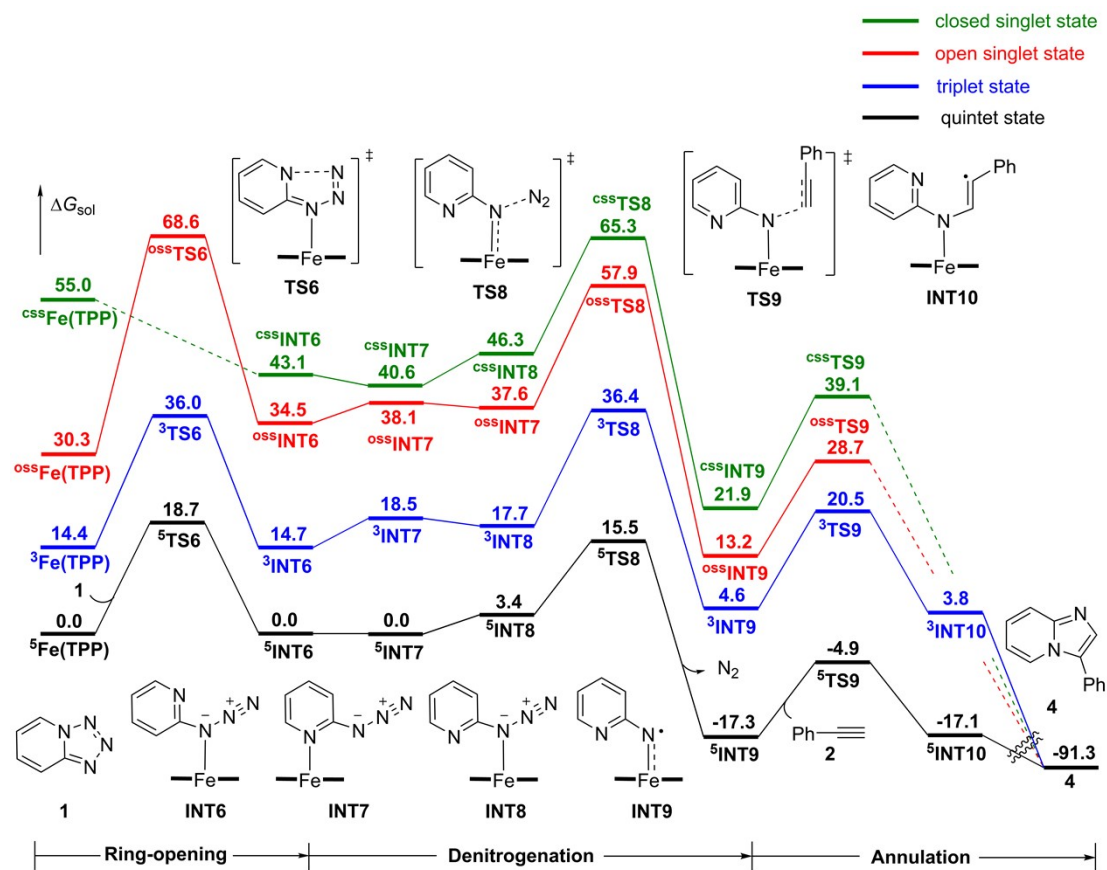

**Fig. S8** Free energy profiles for Fe-porphyrin catalyzed denitrogenative annulation of **1**. The energies are shown in kcal mol<sup>-1</sup>.



The bond orders and spin densities of  ${}^6\text{INT4}$  and  ${}^5\text{INT9}$  were calculated to confirm the structure. In  ${}^6\text{INT4}$ , the Mayer bond order value and Wiberg bond order value of the Mn–N bond are 0.44 and 0.71, respectively, suggesting a weaker bond strength compared to the Fe–N bond in  ${}^5\text{INT9}$  with a Mayer bond order value of 0.75 and a Wiberg bond order value of 1.19. In addition, the spin densities on the N atom and Mn atom of  ${}^6\text{INT4}$  are 1.17 and 4.06, respectively, while in  ${}^5\text{INT9}$ , the spin densities on the N atom and Fe atom are -0.64 and 4.47, respectively. These results indicate significant delocalization of the single electron over the Fe–N bond.

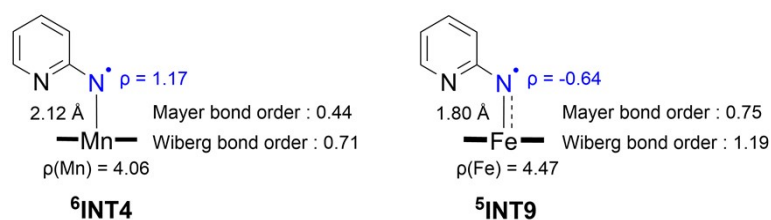

**Fig. S9** M–N bond orders and spin densities ( $\rho$ ) in  ${}^6\text{INT4}$  and  ${}^5\text{INT9}$ .

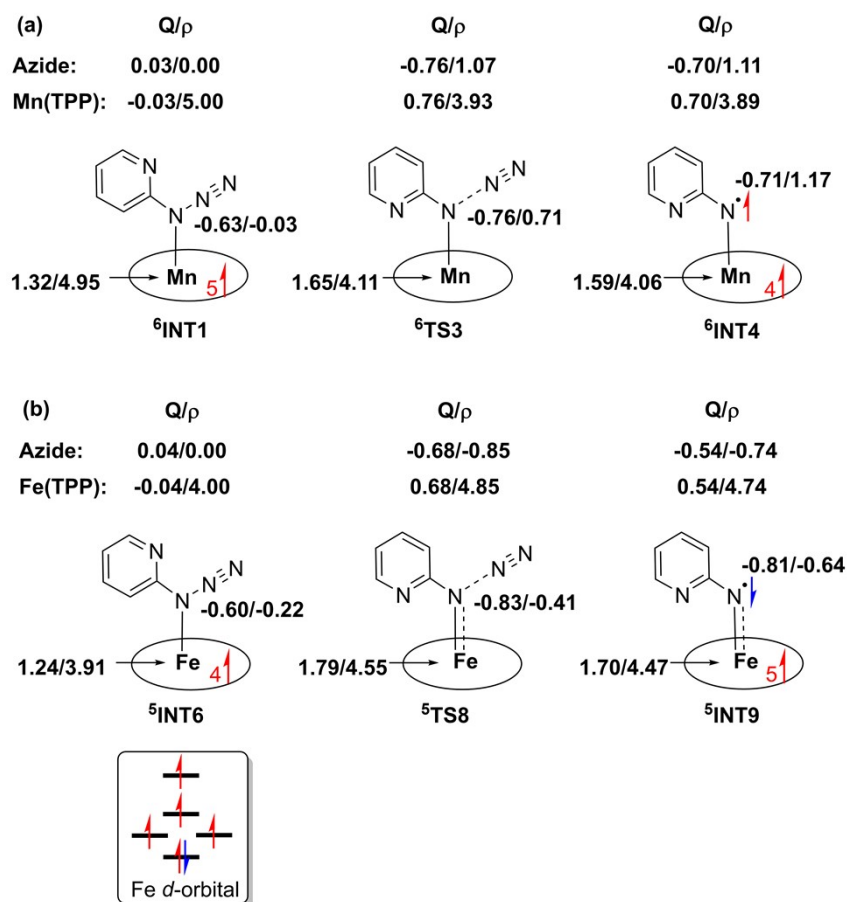

**Fig. S10** Populations of Mulliken charges ( $Q$  in e) and spin densities ( $\rho$ ) for the key structures of the denitrogenation process.

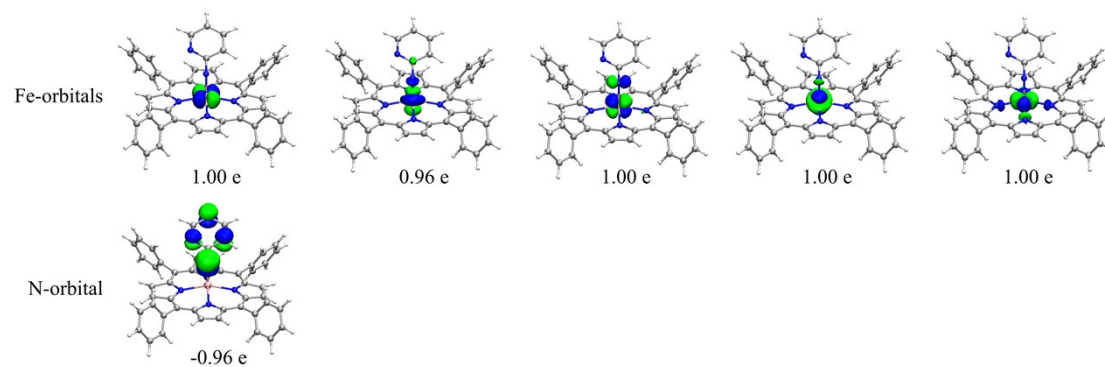

**Fig. S11** SNOs of Fe-nitrene specie  $^5\text{INT9}$  and their occupancies. The negative occupation number signifies a  $\beta$ -spin electron.

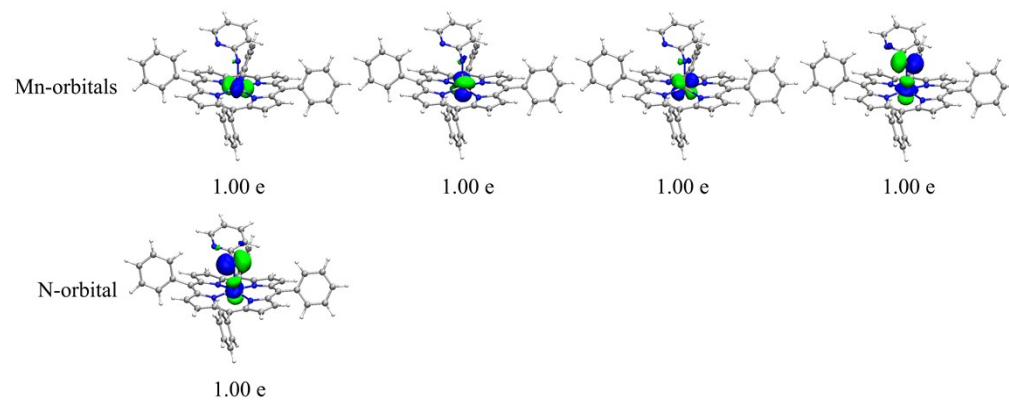

**Fig. S12** SNOs of Mn-nitrene specie  $^6\text{INT4}$  and their occupancies.

**Table S1. Electronic Energies and Free Energies (in Hartree) of the Structures Calculated at the (U)M06/6-311+G(d,p)-SDD(SMD<sub>benzene</sub>)/(U)B3LYP-D3/6-31G(d)-LANL2DZ Level of Theory**

| Structures                 | ZPVE     | TCE      | TCH      | TCG       | E <sub>sol</sub> | Gsol(E <sub>sol</sub> +TCG) | Imaginary Frequency |
|----------------------------|----------|----------|----------|-----------|------------------|-----------------------------|---------------------|
| <b>1</b>                   | 0.093942 | 0.099606 | 0.100551 | 0.063950  | -411.711218      | -411.647268                 |                     |
| <b>2</b>                   | 0.109556 | 0.116034 | 0.116978 | 0.079117  | -308.231092      | -308.151975                 |                     |
| <b><sup>2</sup>Mn(TPP)</b> | 0.599243 | 0.635908 | 0.636852 | 0.527490  | -2016.013840     | -2015.486350                |                     |
| <b><sup>4</sup>Mn(TPP)</b> | 0.599259 | 0.635892 | 0.636836 | 0.527065  | -2016.059402     | -2015.532337                |                     |
| <b><sup>6</sup>Mn(TPP)</b> | 0.597151 | 0.634291 | 0.635236 | 0.524298  | -2016.081283     | -2015.556985                |                     |
| <b><sup>2</sup>TS1</b>     | 0.691243 | 0.734867 | 0.735811 | 0.611063  | -2427.712805     | -2427.101742                | 243.00 <i>i</i>     |
| <b><sup>4</sup>TS1</b>     | 0.691670 | 0.735993 | 0.736937 | 0.609364  | -2427.756781     | -2427.147417                | 245.68 <i>i</i>     |
| <b><sup>6</sup>TS1</b>     | 0.689746 | 0.734503 | 0.735447 | 0.606898  | -2427.786914     | -2427.180016                | 237.70 <i>i</i>     |
| <b><sup>2</sup>INT1</b>    | 0.692487 | 0.737764 | 0.738708 | 0.609590  | -2427.744098     | -2427.134508                |                     |
| <b><sup>4</sup>INT1</b>    | 0.692350 | 0.737633 | 0.738577 | 0.608609  | -2427.792692     | -2427.184083                |                     |
| <b><sup>6</sup>INT1</b>    | 0.690472 | 0.736172 | 0.737116 | 0.606534  | -2427.816341     | -2427.209807                |                     |
| <b><sup>2</sup>INT2</b>    | 0.692804 | 0.738033 | 0.738977 | 0.609684  | -2427.730736     | -2427.121052                |                     |
| <b><sup>4</sup>INT2</b>    | 0.692763 | 0.738049 | 0.738993 | 0.608605  | -2427.793106     | -2427.184501                |                     |
| <b><sup>6</sup>INT2</b>    | 0.690642 | 0.736326 | 0.737270 | 0.605644  | -2427.817246     | -2427.211602                |                     |
| <b><sup>2</sup>TS2</b>     | 0.803197 | 0.855414 | 0.856358 | 0.712152  | -2735.943071     | -2735.230919                | 410.73 <i>i</i>     |
| <b><sup>4</sup>TS2</b>     | 0.803315 | 0.855429 | 0.856373 | 0.712211  | -2735.992129     | -2735.279918                | 409.59 <i>i</i>     |
| <b><sup>6</sup>TS2</b>     | 0.801084 | 0.853811 | 0.854756 | 0.707871  | -2736.024481     | -2735.316610                | 406.95 <i>i</i>     |
| <b>3</b>                   | 0.209339 | 0.221794 | 0.222738 | 0.168864  | -720.036601      | -719.867737                 |                     |
| <b><sup>2</sup>INT3</b>    | 0.692018 | 0.737452 | 0.738397 | 0.608215  | -2427.737688     | -2427.129473                |                     |
| <b><sup>4</sup>INT3</b>    | 0.692053 | 0.737491 | 0.738435 | 0.607586  | -2427.783736     | -2427.176150                |                     |
| <b><sup>6</sup>INT3</b>    | 0.690113 | 0.735924 | 0.736868 | 0.605194  | -2427.809431     | -2427.204237                |                     |
| <b><sup>2</sup>TS3</b>     | 0.689411 | 0.734248 | 0.735192 | 0.607466  | -2427.729099     | -2427.121633                | 659.94 <i>i</i>     |
| <b><sup>4</sup>TS3</b>     | 0.688839 | 0.733926 | 0.734870 | 0.606000  | -2427.764775     | -2427.158775                | 701.21 <i>i</i>     |
| <b><sup>6</sup>TS3</b>     | 0.687978 | 0.733571 | 0.734515 | 0.603541  | -2427.766708     | -2427.163167                | 530.57 <i>i</i>     |
| <b>N<sub>2</sub></b>       | 0.005599 | 0.007960 | 0.008904 | -0.012850 | -109.484696      | -109.497546                 |                     |
| <b><sup>2</sup>INT4</b>    | 0.682001 | 0.725043 | 0.725987 | 0.600430  | -2318.302853     | -2317.702423                |                     |

---

|                              |          |           |           |          |              |              |                 |
|------------------------------|----------|-----------|-----------|----------|--------------|--------------|-----------------|
| <b><sup>4</sup>INT4</b>      | 0.681929 | 0.724925  | 0.725869  | 0.601186 | -2318.313587 | -2317.712401 |                 |
| <b><sup>6</sup>INT4</b>      | 0.680714 | 0.724200  | 0.725144  | 0.598848 | -2318.315467 | -2317.716619 |                 |
| <b><sup>2</sup>TS4</b>       | 0.793349 | 0.843302  | 0.844246  | 0.706032 | -2626.524792 | -2625.818760 | 497.44 <i>i</i> |
| <b><sup>4</sup>TS4</b>       | 0.792809 | 0.842924  | 0.843869  | 0.704352 | -2626.539078 | -2625.834726 | 664.14 <i>i</i> |
| <b><sup>6</sup>TS4</b>       | 0.791712 | 0.842377  | 0.843321  | 0.702055 | -2626.544685 | -2625.842630 | 406.22 <i>i</i> |
| <b><sup>2</sup>INT5</b>      | 0.795782 | 0.845704  | 0.846648  | 0.707539 | -2626.568346 | -2625.860807 |                 |
| <b><sup>4</sup>INT5</b>      | 0.795950 | 0.845851  | 0.846795  | 0.707038 | -2626.565554 | -2625.858516 |                 |
| <b><sup>6</sup>INT5</b>      | 0.794753 | 0.845129  | 0.846073  | 0.702684 | -2626.604864 | -2625.902180 |                 |
| <b>4</b>                     | 0.199711 | 0.210270  | 0.211214  | 0.162687 | -610.609889  | -610.4472020 |                 |
| <b><sup>2</sup>TS5</b>       | 0.803586 | 0.8556930 | 0.8566370 | 0.712796 | -2735.947129 | -2735.234333 | 359.80 <i>i</i> |
| <b><sup>4</sup>TS5</b>       | 0.803598 | 0.855722  | 0.856667  | 0.712127 | -2735.993257 | -2735.281130 | 373.32 <i>i</i> |
| <b><sup>6</sup>TS5</b>       | 0.801147 | 0.853989  | 0.854933  | 0.706798 | -2736.020657 | -2735.313859 | 366.47 <i>i</i> |
| <b><sup>css</sup>Fe(TPP)</b> | 0.599771 | 0.636354  | 0.637299  | 0.528475 | -2035.558676 | -2035.030201 |                 |
| <b><sup>oss</sup>Fe(TPP)</b> | 0.599549 | 0.636237  | 0.637181  | 0.528085 | -2035.597571 | -2035.069486 |                 |
| <b><sup>3</sup>Fe(TPP)</b>   | 0.599537 | 0.636283  | 0.637227  | 0.526567 | -2035.621391 | -2035.094824 |                 |
| <b><sup>5</sup>Fe(TPP)</b>   | 0.597442 | 0.634568  | 0.635512  | 0.524515 | -2035.642295 | -2035.117780 |                 |
| <b><sup>oss</sup>TS6</b>     | 0.688115 | 0.732708  | 0.733652  | 0.688115 | -2447.262505 | -2446.655787 | 245.54 <i>i</i> |
| <b><sup>3</sup>TS6</b>       | 0.692196 | 0.736464  | 0.737408  | 0.692196 | -2447.317532 | -2446.707608 | 249.16 <i>i</i> |
| <b><sup>5</sup>TS6</b>       | 0.690014 | 0.734755  | 0.735699  | 0.690014 | -2447.342230 | -2446.735193 | 236.51 <i>i</i> |
| <b><sup>css</sup>INT6</b>    | 0.693449 | 0.738153  | 0.739098  | 0.612646 | -2447.308950 | -2446.696304 |                 |
| <b><sup>oss</sup>INT6</b>    | 0.692965 | 0.738059  | 0.739003  | 0.611421 | -2447.321521 | -2446.710100 |                 |
| <b><sup>3</sup>INT6</b>      | 0.692994 | 0.738193  | 0.739137  | 0.609872 | -2447.351557 | -2446.741685 |                 |
| <b><sup>5</sup>INT6</b>      | 0.690880 | 0.736514  | 0.737458  | 0.606995 | -2447.372034 | -2446.765039 |                 |
| <b><sup>css</sup>INT7</b>    | 0.694041 | 0.738593  | 0.739537  | 0.613717 | -2447.314006 | -2446.700289 |                 |
| <b><sup>oss</sup>INT7</b>    | 0.693207 | 0.738193  | 0.739137  | 0.611599 | -2447.315891 | -2446.704292 |                 |
| <b><sup>3</sup>INT7</b>      | 0.692904 | 0.738104  | 0.739048  | 0.609550 | -2447.345133 | -2446.735583 |                 |
| <b><sup>5</sup>INT7</b>      | 0.691115 | 0.736709  | 0.737653  | 0.606699 | -2447.371801 | -2446.765102 |                 |
| <b><sup>css</sup>TS7</b>     | 0.804891 | 0.856282  | 0.857226  | 0.716875 | -2755.511286 | -2754.794411 | 427.86 <i>i</i> |
| <b><sup>oss</sup>TS7</b>     | 0.803855 | 0.855804  | 0.856748  | 0.714424 | -2756.440909 | -2755.726485 | 418.97 <i>i</i> |

---

|                     |          |          |          |          |              |              |                 |
|---------------------|----------|----------|----------|----------|--------------|--------------|-----------------|
| <sup>3</sup> TS7    | 0.803785 | 0.855887 | 0.856831 | 0.712656 | -2755.549997 | -2754.837341 | 409.44 <i>i</i> |
| <sup>5</sup> TS7    | 0.801552 | 0.854177 | 0.855121 | 0.708262 | -2755.575300 | -2754.867038 | 416.21 <i>i</i> |
| <sup>css</sup> INT8 | 0.692961 | 0.737870 | 0.738814 | 0.610557 | -2447.301861 | -2446.691304 |                 |
| <sup>oss</sup> INT8 | 0.692381 | 0.737711 | 0.738655 | 0.609414 | -2447.314560 | -2446.705146 |                 |
| <sup>3</sup> INT8   | 0.692445 | 0.737893 | 0.738837 | 0.607657 | -2447.344522 | -2446.736865 |                 |
| <sup>5</sup> INT8   | 0.690370 | 0.736158 | 0.737102 | 0.605725 | -2447.365378 | -2446.759653 |                 |
| <sup>css</sup> TS8  | 0.690644 | 0.735142 | 0.736086 | 0.610755 | -2447.271715 | -2446.660960 | 661.95 <i>i</i> |
| <sup>oss</sup> TS8  | 0.689919 | 0.734598 | 0.735542 | 0.609748 | -2447.282564 | -2446.672816 | 514.98 <i>i</i> |
| <sup>3</sup> TS8    | 0.689324 | 0.734255 | 0.735199 | 0.607340 | -2447.314372 | -2446.707032 | 624.99 <i>i</i> |
| <sup>5</sup> TS8    | 0.686850 | 0.732709 | 0.733653 | 0.601358 | -2447.341732 | -2446.740374 | 531.78 <i>i</i> |
| <sup>css</sup> INT9 | 0.683084 | 0.725832 | 0.726776 | 0.603786 | -2337.836375 | -2337.232589 |                 |
| <sup>oss</sup> INT9 | 0.681918 | 0.724986 | 0.725930 | 0.602526 | -2337.849050 | -2337.246524 |                 |
| <sup>3</sup> INT9   | 0.682613 | 0.725500 | 0.726444 | 0.601562 | -2337.861782 | -2337.260220 |                 |
| <sup>5</sup> INT9   | 0.680084 | 0.723501 | 0.724446 | 0.598800 | -2337.893797 | -2337.294997 |                 |
| <sup>css</sup> TS9  | 0.794812 | 0.844333 | 0.845277 | 0.709376 | -2646.066593 | -2645.357217 | 371.13 <i>i</i> |
| <sup>oss</sup> TS9  | 0.793795 | 0.843696 | 0.844640 | 0.707609 | -2646.081355 | -2645.373746 | 408.90 <i>i</i> |
| <sup>3</sup> TS9    | 0.793381 | 0.843433 | 0.844377 | 0.705259 | -2646.092095 | -2645.386836 | 461.39 <i>i</i> |
| <sup>5</sup> TS9    | 0.790723 | 0.841684 | 0.842628 | 0.699777 | -2646.127019 | -2645.427242 | 357.46 <i>i</i> |
| <sup>3</sup> INT10  | 0.796720 | 0.846400 | 0.847345 | 0.708453 | -2646.121845 | -2645.413392 |                 |
| <sup>5</sup> INT10  | 0.794941 | 0.845295 | 0.846239 | 0.704759 | -2646.151426 | -2645.446667 |                 |

**ZPVE** = zero-point vibrational energy; **TCE** = thermal correction to energy; **TCH** = thermal correction to enthalpy; **TCG** = thermal correction to Gibbs free energy.

## Cartesian coordinates of the structures

(U)M06/6-311+G(d,p)-SDD(SMD<sub>benzene</sub>)/(U)B3LYP-D3/6-31G(d)-LANL2DZ

### 1

|            |             |             |   |
|------------|-------------|-------------|---|
| C          | 0.91768700  | 1.42689700  |   |
| 0.00001900 |             |             |   |
| C          | -0.31843400 | 0.73674300  | - |
| 0.00006600 |             |             |   |
| C          | 0.83019700  | -1.40030600 |   |
| 0.00004100 |             |             |   |
| C          | 2.02945700  | -0.74389700 |   |
| 0.00008000 |             |             |   |
| C          | 2.07321200  | 0.68376000  | - |
| 0.00008100 |             |             |   |
| H          | 0.91474800  | 2.51040400  |   |
| 0.00007800 |             |             |   |
| H          | 0.69110800  | -2.47371300 |   |
| 0.00000800 |             |             |   |
| H          | 2.94733200  | -1.32064000 |   |
| 0.00005000 |             |             |   |
| H          | 3.03778300  | 1.18143800  | - |
| 0.00001800 |             |             |   |
| N          | -1.59504600 | 1.13003400  |   |
| 0.00003200 |             |             |   |
| N          | -0.30807100 | -0.64115100 | - |
| 0.00003400 |             |             |   |
| N          | -1.59688700 | -1.07867100 | - |
| 0.00008800 |             |             |   |
| N          | -2.32623700 | 0.00169100  |   |
| 0.00007800 |             |             |   |

### 2

|            |             |             |   |
|------------|-------------|-------------|---|
| C          | 1.51251400  | -1.20921000 |   |
| 0.00001300 |             |             |   |
| C          | 0.11941400  | -1.21383700 | - |
| 0.00001100 |             |             |   |
| C          | -0.59425000 | -0.00002100 | - |
| 0.00003100 |             |             |   |
| C          | 0.11939600  | 1.21382700  | - |
| 0.00001300 |             |             |   |
| C          | 1.51248000  | 1.20923100  |   |

|            |             |             |   |
|------------|-------------|-------------|---|
| 0.00001500 |             |             |   |
| C          | 2.21310200  | 0.00001100  |   |
| 0.00002500 |             |             |   |
| H          | 2.05311900  | -2.15178600 |   |
| 0.00002300 |             |             |   |
| H          | -0.42931200 | -2.15060600 | - |
| 0.00002200 |             |             |   |
| H          | -0.42937200 | 2.15057200  | - |
| 0.00002400 |             |             |   |
| H          | 2.05308400  | 2.15180800  |   |
| 0.00002500 |             |             |   |
| H          | 3.29967000  | 0.00003400  |   |
| 0.00004500 |             |             |   |
| C          | -2.02358200 | -0.00001200 | - |
| 0.00007300 |             |             |   |
| C          | -3.23364100 | 0.00000400  | - |
| 0.00001500 |             |             |   |
| H          | -4.29978900 | 0.00001500  |   |
| 0.00049400 |             |             |   |

**<sup>2</sup>Mn (TPP)**

|            |             |             |   |
|------------|-------------|-------------|---|
| Mn         | 0.00136500  | -0.00005500 | - |
| 0.00027100 |             |             |   |
| N          | 1.46954000  | 1.39022000  |   |
| 0.00856900 |             |             |   |
| C          | -0.09233700 | -3.45485300 |   |
| 0.01597800 |             |             |   |
| C          | 3.45492700  | -0.09461700 | - |
| 0.00081600 |             |             |   |
| C          | 3.40564900  | -2.60465700 | - |
| 0.05874100 |             |             |   |
| C          | 2.41748800  | -3.54075300 | - |
| 0.06649500 |             |             |   |
| C          | 2.76392600  | -1.31354700 | - |
| 0.02952700 |             |             |   |
| C          | 1.16261900  | -2.83108100 | - |
| 0.01981300 |             |             |   |
| H          | 2.52334200  | -4.61513400 | - |
| 0.09755300 |             |             |   |
| H          | 4.47327000  | -2.76770100 | - |
| 0.07312100 |             |             |   |
| N          | -1.38868600 | 1.46845500  |   |
| 0.00973900 |             |             |   |
| N          | 1.39124400  | -1.46856700 | - |

|            |             |             |   |
|------------|-------------|-------------|---|
| 0.00911700 |             |             |   |
| N          | -1.46695300 | -1.39033000 | - |
| 0.01016700 |             |             |   |
| C          | 0.09685300  | 3.45469400  | - |
| 0.01518700 |             |             |   |
| C          | -3.45333500 | 0.09454000  | - |
| 0.00065300 |             |             |   |
| C          | -3.53549700 | -2.41182300 |   |
| 0.15428900 |             |             |   |
| C          | 3.54309800  | 2.41431800  |   |
| 0.05819400 |             |             |   |
| C          | -3.39815300 | 2.60176800  | - |
| 0.15487400 |             |             |   |
| C          | -2.59944300 | -3.40020900 |   |
| 0.15498900 |             |             |   |
| C          | 2.60767800  | 3.40310500  |   |
| 0.06691100 |             |             |   |
| C          | -2.40935900 | 3.53739200  | - |
| 0.15475500 |             |             |   |
| C          | -2.82837700 | -1.16019000 |   |
| 0.03951300 |             |             |   |
| C          | 2.83167700  | 1.16029300  |   |
| 0.02849200 |             |             |   |
| C          | -2.76067800 | 1.31322600  | - |
| 0.04035700 |             |             |   |
| C          | -1.31120800 | -2.76208100 |   |
| 0.04223900 |             |             |   |
| C          | 1.31583500  | 2.76322400  |   |
| 0.02007500 |             |             |   |
| C          | -1.15805700 | 2.82961900  | - |
| 0.04203600 |             |             |   |
| H          | -2.76027400 | -4.46482700 |   |
| 0.24028400 |             |             |   |
| H          | 2.77227800  | 4.47003300  |   |
| 0.09866000 |             |             |   |
| H          | -2.51150700 | 4.60926600  | - |
| 0.23968800 |             |             |   |
| H          | -4.60727400 | -2.51482300 |   |
| 0.23895600 |             |             |   |
| H          | 4.61805100  | 2.51863600  |   |
| 0.07252700 |             |             |   |
| H          | -4.46264400 | 2.76344100  | - |
| 0.23965800 |             |             |   |
| C          | 0.13509000  | 4.94941100  | - |



|            |             |             |   |
|------------|-------------|-------------|---|
| 0.03218200 |             |             |   |
| C          | -0.34663300 | 5.68912900  |   |
| 1.05880800 |             |             |   |
| C          | 0.64994300  | 5.64116500  | - |
| 1.13945700 |             |             |   |
| C          | -0.31350800 | 7.08421800  |   |
| 1.04404800 |             |             |   |
| H          | -0.74589400 | 5.15975300  |   |
| 1.91940200 |             |             |   |
| C          | 0.68393200  | 7.03620900  | - |
| 1.15505700 |             |             |   |
| H          | 1.02140500  | 5.07478100  | - |
| 1.98884800 |             |             |   |
| C          | 0.20230800  | 7.76196700  | - |
| 0.06305000 |             |             |   |
| H          | -0.68700300 | 7.64123400  |   |
| 1.89929000 |             |             |   |
| H          | 1.08249700  | 7.55582300  | - |
| 2.02242600 |             |             |   |
| H          | 0.22843600  | 8.84828400  | - |
| 0.07493100 |             |             |   |
| C          | 4.95069700  | -0.13568500 | - |
| 0.00155400 |             |             |   |
| C          | 5.65447900  | -0.52999300 | - |
| 1.14934800 |             |             |   |
| C          | 5.67635000  | 0.21920500  |   |
| 1.14548800 |             |             |   |
| C          | 7.04966500  | -0.56965500 | - |
| 1.15031700 |             |             |   |
| H          | 5.09788900  | -0.80463800 | - |
| 2.04109600 |             |             |   |
| C          | 7.07159900  | 0.18183600  |   |
| 1.14498900 |             |             |   |
| H          | 5.13673800  | 0.52403600  |   |
| 2.03786500 |             |             |   |
| C          | 7.76224600  | -0.21326800 | - |
| 0.00303100 |             |             |   |
| H          | 7.57956000  | -0.87492500 | - |
| 2.04877500 |             |             |   |
| H          | 7.61847600  | 0.45732500  |   |
| 2.04289700 |             |             |   |
| H          | 8.84853000  | -0.24327300 | - |
| 0.00358800 |             |             |   |
| C          | -0.13596400 | -4.94939200 |   |

|            |             |             |   |
|------------|-------------|-------------|---|
| 0.03487800 |             |             |   |
| C          | -0.65805000 | -5.66321700 | - |
| 1.05478800 |             |             |   |
| C          | 0.34021100  | -5.66665500 |   |
| 1.14323100 |             |             |   |
| C          | -0.70236900 | -7.05797000 | - |
| 1.03748900 |             |             |   |
| H          | -1.02753800 | -5.11412100 | - |
| 1.91632500 |             |             |   |
| C          | 0.29676700  | -7.06140300 |   |
| 1.16136900 |             |             |   |
| H          | 0.74279400  | -5.12014200 |   |
| 1.99145300 |             |             |   |
| C          | -0.22479100 | -7.76128700 |   |
| 0.07081500 |             |             |   |
| H          | -1.10636500 | -7.59495800 | - |
| 1.89167600 |             |             |   |
| H          | 0.66616900  | -7.60075600 |   |
| 2.02959600 |             |             |   |
| H          | -0.25909500 | -8.84735200 |   |
| 0.08471700 |             |             |   |
| C          | -4.94744900 | 0.13546700  | - |
| 0.00132400 |             |             |   |
| C          | -5.64941200 | 0.69279200  |   |
| 1.07889300 |             |             |   |
| C          | -5.67779200 | -0.38229700 | - |
| 1.08240200 |             |             |   |
| C          | -7.04432000 | 0.73171600  |   |
| 1.07845500 |             |             |   |
| H          | -5.09067200 | 1.09306900  |   |
| 1.92018400 |             |             |   |
| C          | -7.07271400 | -0.34385500 | - |
| 1.08382300 |             |             |   |
| H          | -5.14092500 | -0.81291700 | - |
| 1.92295000 |             |             |   |
| C          | -7.76030100 | 0.21344500  | - |
| 0.00317500 |             |             |   |
| H          | -7.57160300 | 1.16293400  |   |
| 1.92533800 |             |             |   |
| H          | -7.62195100 | -0.74525100 | - |
| 1.93140900 |             |             |   |
| H          | -8.84657500 | 0.24362000  | - |
| 0.00391700 |             |             |   |

**<sup>4</sup>Mn (TPP)**

|            |             |             |   |
|------------|-------------|-------------|---|
| Mn         | -0.00134000 | -0.00001800 | - |
| 0.00015100 |             |             |   |
| N          | -1.44675700 | 1.41811600  |   |
| 0.00849700 |             |             |   |
| C          | 0.03102200  | -3.45667400 |   |
| 0.01548700 |             |             |   |
| C          | -3.45680400 | -0.03333100 | - |
| 0.00061800 |             |             |   |
| C          | -3.45274200 | -2.54522600 | - |
| 0.05677400 |             |             |   |
| C          | -2.48128800 | -3.49875400 | - |
| 0.06508600 |             |             |   |
| C          | -2.78818400 | -1.26531200 | - |
| 0.02858500 |             |             |   |
| C          | -1.21363500 | -2.81141400 | - |
| 0.01939400 |             |             |   |
| H          | -2.60649300 | -4.57106100 | - |
| 0.09610800 |             |             |   |
| H          | -4.52306300 | -2.68962700 | - |
| 0.07045300 |             |             |   |
| N          | 1.41651200  | 1.44579600  |   |
| 0.01179300 |             |             |   |
| N          | -1.41913700 | -1.44574000 | - |
| 0.00879100 |             |             |   |
| N          | 1.44411100  | -1.41824900 | - |
| 0.01202800 |             |             |   |
| C          | -0.03563000 | 3.45662000  | - |
| 0.01469700 |             |             |   |
| C          | 3.45507900  | 0.03330900  | - |
| 0.00053900 |             |             |   |
| C          | 3.49347400  | -2.47547100 |   |
| 0.15389400 |             |             |   |
| C          | -3.50119300 | 2.47814200  |   |
| 0.05633000 |             |             |   |
| C          | 3.44503900  | 2.54246100  | - |
| 0.15432700 |             |             |   |
| C          | 2.54001200  | -3.44718300 |   |
| 0.15407700 |             |             |   |
| C          | -2.54833100 | 3.45023800  |   |
| 0.06547300 |             |             |   |
| C          | 2.47297900  | 3.49556800  | - |
| 0.15382000 |             |             |   |
| C          | 2.80866100  | -1.21114200 |   |

|            |             |             |   |
|------------|-------------|-------------|---|
| 0.03860500 |             |             |   |
| C          | -2.81207100 | 1.21130400  |   |
| 0.02782400 |             |             |   |
| C          | 2.78480400  | 1.26508900  | - |
| 0.03928200 |             |             |   |
| C          | 1.26296500  | -2.78630900 |   |
| 0.04085600 |             |             |   |
| C          | -1.26764000 | 2.78750800  |   |
| 0.01975000 |             |             |   |
| C          | 1.20897800  | 2.81011000  | - |
| 0.04053400 |             |             |   |
| H          | 2.68216400  | -4.51445100 |   |
| 0.23957900 |             |             |   |
| H          | -2.69426700 | 4.51989700  |   |
| 0.09703300 |             |             |   |
| H          | 2.59439700  | 4.56542300  | - |
| 0.23897100 |             |             |   |
| H          | 4.56317400  | -2.59772200 |   |
| 0.23933600 |             |             |   |
| H          | -4.57410800 | 2.60184200  |   |
| 0.06982400 |             |             |   |
| H          | 4.51214600  | 2.68543900  | - |
| 0.23996500 |             |             |   |
| C          | 0.04818100  | -4.95177700 |   |
| 0.03455000 |             |             |   |
| C          | -0.44170400 | -5.66058100 |   |
| 1.14238800 |             |             |   |
| C          | 0.55862000  | -5.67477100 | - |
| 1.05461600 |             |             |   |
| C          | -0.42309200 | -7.05587800 |   |
| 1.16046000 |             |             |   |
| H          | -0.83529600 | -5.10708900 |   |
| 1.99030200 |             |             |   |
| C          | 0.57810300  | -7.07008700 | - |
| 1.03739800 |             |             |   |
| H          | 0.93867800  | -5.13228900 | - |
| 1.91574300 |             |             |   |
| C          | 0.08697100  | -7.76487900 |   |
| 0.07035900 |             |             |   |
| H          | -0.80285400 | -7.58862000 |   |
| 2.02830100 |             |             |   |
| H          | 0.97333300  | -7.61411300 | - |
| 1.89123500 |             |             |   |
| H          | 0.10190700  | -8.85138500 |   |

|            |             |             |   |
|------------|-------------|-------------|---|
| 0.08420000 |             |             |   |
| C          | 4.94969700  | 0.04772300  | - |
| 0.00103400 |             |             |   |
| C          | 5.66135500  | 0.59424300  |   |
| 1.07839700 |             |             |   |
| C          | 5.67099100  | -0.48480600 | - |
| 1.08105500 |             |             |   |
| C          | 7.05672900  | 0.60820500  |   |
| 1.07826300 |             |             |   |
| H          | 5.10969700  | 1.00581200  |   |
| 1.91890700 |             |             |   |
| C          | 7.06637100  | -0.47132300 | - |
| 1.08218400 |             |             |   |
| H          | 5.12674700  | -0.90713500 | - |
| 1.92106100 |             |             |   |
| C          | 7.76358700  | 0.07537700  | - |
| 0.00229300 |             |             |   |
| H          | 7.59143600  | 1.03132100  |   |
| 1.92457900 |             |             |   |
| H          | 7.60852800  | -0.88387100 | - |
| 1.92897600 |             |             |   |
| H          | 8.85022700  | 0.08609100  | - |
| 0.00279600 |             |             |   |
| C          | -0.04729700 | 4.95179600  | - |
| 0.03245700 |             |             |   |
| C          | 0.44878200  | 5.68343100  |   |
| 1.05757200 |             |             |   |
| C          | -0.55077400 | 5.65210500  | - |
| 1.13960400 |             |             |   |
| C          | 0.44077400  | 7.07887800  |   |
| 1.04199000 |             |             |   |
| H          | 0.83935200  | 5.14750300  |   |
| 1.91809800 |             |             |   |
| C          | -0.55965000 | 7.04751900  | - |
| 1.15604200 |             |             |   |
| H          | -0.93323800 | 5.09199900  | - |
| 1.98827100 |             |             |   |
| C          | -0.06388200 | 7.76515500  | - |
| 0.06499800 |             |             |   |
| H          | 0.82512200  | 7.62958500  |   |
| 1.89651100 |             |             |   |
| H          | -0.94968200 | 7.57369600  | - |
| 2.02333500 |             |             |   |
| H          | -0.07042300 | 8.85176000  | - |

|                             |             |             |   |
|-----------------------------|-------------|-------------|---|
| 0.07753800                  |             |             |   |
| C                           | -4.95309400 | -0.04783100 | - |
| 0.00116000                  |             |             |   |
| C                           | -5.66399300 | -0.43371400 | - |
| 1.14746200                  |             |             |   |
| C                           | -5.67227100 | 0.32407800  |   |
| 1.14460000                  |             |             |   |
| C                           | -7.05965700 | -0.44851800 | - |
| 1.14823300                  |             |             |   |
| H                           | -5.11251000 | -0.72145000 | - |
| 2.03825000                  |             |             |   |
| C                           | -7.06795600 | 0.31155200  |   |
| 1.14431300                  |             |             |   |
| H                           | -5.12722500 | 0.62250600  |   |
| 2.03583300                  |             |             |   |
| C                           | -7.76567200 | -0.07535300 | - |
| 0.00222400                  |             |             |   |
| H                           | -7.59499200 | -0.74752200 | - |
| 2.04557300                  |             |             |   |
| H                           | -7.60972500 | 0.59997800  |   |
| 2.04125500                  |             |             |   |
| H                           | -8.85231700 | -0.08600500 | - |
| 0.00262600                  |             |             |   |
| <b><sup>6</sup>Mn (TPP)</b> |             |             |   |
| Mn                          | 0.00160800  | -0.00007700 | - |
| 0.00108800                  |             |             |   |
| N                           | 1.41398500  | -1.53840000 | - |
| 0.01083200                  |             |             |   |
| C                           | 0.15255100  | 3.47169600  | - |
| 0.00306000                  |             |             |   |
| C                           | 3.47342800  | -0.14887200 | - |
| 0.00136300                  |             |             |   |
| C                           | 3.61714300  | 2.38941800  |   |
| 0.03536200                  |             |             |   |
| C                           | 2.69504900  | 3.39534400  |   |
| 0.04787000                  |             |             |   |
| C                           | 2.88828100  | 1.13846800  |   |
| 0.01958500                  |             |             |   |
| C                           | 1.38525400  | 2.77845700  |   |
| 0.01721100                  |             |             |   |
| H                           | 2.88580200  | 4.45833900  |   |
| 0.07472900                  |             |             |   |
| H                           | 4.69315700  | 2.48640300  |   |

|            |             |             |   |
|------------|-------------|-------------|---|
| 0.03795500 |             |             |   |
| N          | -1.53677400 | -1.41243900 | - |
| 0.05753800 |             |             |   |
| N          | 1.54043000  | 1.41177600  |   |
| 0.00892300 |             |             |   |
| N          | -1.41025500 | 1.53874300  |   |
| 0.05608700 |             |             |   |
| C          | -0.14504900 | -3.47199800 |   |
| 0.00298900 |             |             |   |
| C          | -3.47005800 | 0.14874800  | - |
| 0.00082400 |             |             |   |
| C          | -3.38718500 | 2.68610700  | - |
| 0.15628500 |             |             |   |
| C          | 3.39944000  | -2.69017200 | - |
| 0.03696200 |             |             |   |
| C          | -3.60463100 | -2.38626200 |   |
| 0.15555500 |             |             |   |
| C          | -2.38110900 | 3.60834700  | - |
| 0.15301400 |             |             |   |
| C          | 2.39463900  | -3.61351000 | - |
| 0.04850300 |             |             |   |
| C          | -2.68118200 | -3.39123200 |   |
| 0.15293200 |             |             |   |
| C          | -2.77469800 | 1.38135200  | - |
| 0.02023500 |             |             |   |
| C          | 2.78028200  | -1.38143200 | - |
| 0.02184500 |             |             |   |
| C          | -2.88272400 | -1.13882300 |   |
| 0.01881900 |             |             |   |
| C          | -1.13509300 | 2.88446700  | - |
| 0.01545600 |             |             |   |
| C          | 1.14243800  | -2.88678300 | - |
| 0.01808200 |             |             |   |
| C          | -1.37776100 | -2.77674500 |   |
| 0.01486300 |             |             |   |
| H          | -2.47363100 | 4.67981600  | - |
| 0.25621500 |             |             |   |
| H          | 2.49370400  | -4.68897100 | - |
| 0.07452300 |             |             |   |
| H          | -2.86515700 | -4.45076600 |   |
| 0.25679400 |             |             |   |
| H          | -4.44590900 | 2.87196100  | - |
| 0.26448900 |             |             |   |
| H          | 4.46320100  | -2.87892200 | - |

|            |             |             |   |
|------------|-------------|-------------|---|
| 0.03949200 |             |             |   |
| H          | -4.67536000 | -2.48070800 |   |
| 0.26408000 |             |             |   |
| C          | -0.21374500 | -4.96589400 |   |
| 0.03187900 |             |             |   |
| C          | -0.78051600 | -5.67630800 | - |
| 1.03811100 |             |             |   |
| C          | 0.28066600  | -5.68766200 |   |
| 1.12983400 |             |             |   |
| C          | -0.84961500 | -7.06978900 | - |
| 1.01229900 |             |             |   |
| H          | -1.16433600 | -5.12503000 | - |
| 1.89189700 |             |             |   |
| C          | 0.21238300  | -7.08115000 |   |
| 1.15653700 |             |             |   |
| H          | 0.71591500  | -5.14506400 |   |
| 1.96425000 |             |             |   |
| C          | -0.35297100 | -7.77675700 |   |
| 0.08524100 |             |             |   |
| H          | -1.28771400 | -7.60312100 | - |
| 1.85185300 |             |             |   |
| H          | 0.59613000  | -7.62284000 |   |
| 2.01706800 |             |             |   |
| H          | -0.40659900 | -8.86192900 |   |
| 0.10583600 |             |             |   |
| C          | 4.96906200  | -0.21304700 | - |
| 0.00153900 |             |             |   |
| C          | 5.70323800  | 0.18801300  |   |
| 1.12521400 |             |             |   |
| C          | 5.66594700  | -0.67571500 | - |
| 1.12835700 |             |             |   |
| C          | 7.09761600  | 0.12897700  |   |
| 1.12543200 |             |             |   |
| H          | 5.17027400  | 0.54521200  |   |
| 2.00196800 |             |             |   |
| C          | 7.06023700  | -0.73690500 | - |
| 1.12865100 |             |             |   |
| H          | 5.10414900  | -0.98572200 | - |
| 2.00506800 |             |             |   |
| C          | 7.78042200  | -0.33422700 | - |
| 0.00161700 |             |             |   |
| H          | 7.64994300  | 0.44051200  |   |
| 2.00810500 |             |             |   |
| H          | 7.58364900  | -1.09482700 | - |



|            |             |             |   |
|------------|-------------|-------------|---|
| 2.01135500 |             |             |   |
| H          | 8.86610500  | -0.38106700 | - |
| 0.00163200 |             |             |   |
| C          | 0.21192500  | 4.96606300  | - |
| 0.02919900 |             |             |   |
| C          | -0.29157000 | 5.72022600  |   |
| 1.04246200 |             |             |   |
| C          | 0.76632200  | 5.64502400  | - |
| 1.12582700 |             |             |   |
| C          | -0.24028700 | 7.11453000  |   |
| 1.01985100 |             |             |   |
| H          | -0.72142400 | 5.20205800  |   |
| 1.89504400 |             |             |   |
| C          | 0.81840100  | 7.03927100  | - |
| 1.14933800 |             |             |   |
| H          | 1.15302300  | 5.06890500  | - |
| 1.96169000 |             |             |   |
| C          | 0.31543400  | 7.77855900  | - |
| 0.07618900 |             |             |   |
| H          | -0.63071200 | 7.68171600  |   |
| 1.86073800 |             |             |   |
| H          | 1.24721500  | 7.54785400  | - |
| 2.00879400 |             |             |   |
| H          | 0.35560300  | 8.86435500  | - |
| 0.09428200 |             |             |   |
| C          | -4.96328900 | 0.21275300  | - |
| 0.00112600 |             |             |   |
| C          | -5.70520300 | -0.33753500 | - |
| 1.05885500 |             |             |   |
| C          | -5.65587500 | 0.82464200  |   |
| 1.05623200 |             |             |   |
| C          | -7.09916000 | -0.27767600 | - |
| 1.05984000 |             |             |   |
| H          | -5.17726000 | -0.80902900 | - |
| 1.88284800 |             |             |   |
| C          | -7.04982500 | 0.88468500  |   |
| 1.05634300 |             |             |   |
| H          | -5.08992900 | 1.24920900  |   |
| 1.88052000 |             |             |   |
| C          | -7.77617300 | 0.33370700  | - |
| 0.00198100 |             |             |   |
| H          | -7.65601200 | -0.70428900 | - |
| 1.88996800 |             |             |   |
| H          | -7.56851600 | 1.35754600  |   |

|                        |             |             |   |
|------------------------|-------------|-------------|---|
| 1.88614100             |             |             |   |
| H                      | -8.86185500 | 0.38040200  | - |
| 0.00231600             |             |             |   |
| <b><sup>2</sup>TS1</b> |             |             |   |
| N                      | -1.08656900 | -1.35754300 |   |
| 0.73157000             |             |             |   |
| C                      | 3.76907600  | 0.08502800  |   |
| 0.17882500             |             |             |   |
| C                      | 0.34922800  | -3.37421800 |   |
| 0.63380500             |             |             |   |
| C                      | 2.83175500  | -3.39501400 |   |
| 0.23325900             |             |             |   |
| C                      | 3.78257900  | -2.43137300 |   |
| 0.09669800             |             |             |   |
| C                      | 1.57659100  | -2.71850400 |   |
| 0.46214800             |             |             |   |
| C                      | 3.11744000  | -1.15687800 |   |
| 0.24557300             |             |             |   |
| H                      | 4.83626000  | -2.56459300 | - |
| 0.09974700             |             |             |   |
| H                      | 2.95911100  | -4.46580100 |   |
| 0.17103700             |             |             |   |
| N                      | -1.09781100 | 1.51174900  |   |
| 0.66957600             |             |             |   |
| N                      | 1.76916900  | -1.35258100 |   |
| 0.44999300             |             |             |   |
| N                      | 1.75136500  | 1.51793000  |   |
| 0.32503000             |             |             |   |
| C                      | -3.10526900 | 0.07007000  |   |
| 0.88140700             |             |             |   |
| C                      | 0.31901700  | 3.53635100  |   |
| 0.43452100             |             |             |   |
| C                      | 2.83447800  | 3.56026600  |   |
| 0.36431700             |             |             |   |
| C                      | -2.13559100 | -3.39723400 |   |
| 1.02415000             |             |             |   |
| C                      | -2.19615300 | 3.54103400  |   |
| 0.54013600             |             |             |   |
| C                      | 3.79449300  | 2.59851300  |   |
| 0.29584100             |             |             |   |
| C                      | -3.09910500 | -2.43864800 |   |
| 1.08692800             |             |             |   |
| C                      | -3.14858500 | 2.57592200  |   |

|            |             |             |   |
|------------|-------------|-------------|---|
| 0.67819300 |             |             |   |
| C          | 1.55877500  | 2.88258300  |   |
| 0.37244100 |             |             |   |
| C          | -0.88199000 | -2.71908900 |   |
| 0.78837700 |             |             |   |
| C          | -0.91549300 | 2.87572200  |   |
| 0.55258300 |             |             |   |
| C          | 3.11469500  | 1.32417600  |   |
| 0.25788800 |             |             |   |
| C          | -2.44161700 | -1.16625900 |   |
| 0.89225600 |             |             |   |
| C          | -2.46051800 | 1.31167700  |   |
| 0.76859700 |             |             |   |
| H          | 4.86626500  | 2.73243900  |   |
| 0.28863200 |             |             |   |
| H          | -4.15576800 | -2.57188900 |   |
| 1.26739000 |             |             |   |
| H          | -4.22072900 | 2.70491400  |   |
| 0.70319800 |             |             |   |
| H          | 2.97175800  | 4.62997900  |   |
| 0.42430300 |             |             |   |
| H          | -2.25245200 | -4.46481500 |   |
| 1.13987000 |             |             |   |
| H          | -2.34423700 | 4.60566300  |   |
| 0.43312600 |             |             |   |
| N          | -0.07957100 | -0.36109100 | - |
| 1.95108900 |             |             |   |
| N          | 0.15439600  | -1.61896200 | - |
| 2.21603900 |             |             |   |
| N          | -0.45671300 | -2.47619100 | - |
| 2.72744500 |             |             |   |
| C          | -1.37531000 | -0.11406400 | - |
| 2.45276600 |             |             |   |
| C          | -1.96611200 | 1.16036800  | - |
| 2.36466100 |             |             |   |
| C          | -3.25817900 | -1.01713900 | - |
| 3.48247100 |             |             |   |
| C          | -3.25651500 | 1.29851900  | - |
| 2.84429400 |             |             |   |
| H          | -1.42180200 | 1.97589400  | - |
| 1.90668900 |             |             |   |
| C          | -3.92448000 | 0.19705600  | - |
| 3.41290400 |             |             |   |
| H          | -3.70355800 | -1.90759700 | - |

|            |             |             |   |
|------------|-------------|-------------|---|
| 3.91595800 |             |             |   |
| H          | -3.75482800 | 2.25982500  | - |
| 2.76808300 |             |             |   |
| H          | -4.93718700 | 0.28597100  | - |
| 3.79093400 |             |             |   |
| N          | -2.01012800 | -1.13930400 | - |
| 3.00674600 |             |             |   |
| Mn         | 0.32957400  | 0.08402600  |   |
| 0.42712500 |             |             |   |
| C          | 0.34335500  | -4.86869000 |   |
| 0.60956400 |             |             |   |
| C          | -0.26170800 | -5.55371500 | - |
| 0.45588600 |             |             |   |
| C          | 0.94146400  | -5.61175400 |   |
| 1.63814400 |             |             |   |
| C          | -0.26915600 | -6.94873300 | - |
| 0.48992500 |             |             |   |
| H          | -0.71692200 | -4.98010600 | - |
| 1.25846900 |             |             |   |
| C          | 0.93354900  | -7.00712500 |   |
| 1.60443200 |             |             |   |
| H          | 1.41031500  | -5.08561200 |   |
| 2.46504400 |             |             |   |
| C          | 0.32766100  | -7.67946900 |   |
| 0.54043700 |             |             |   |
| H          | -0.73708400 | -7.46491800 | - |
| 1.32420800 |             |             |   |
| H          | 1.39717700  | -7.56862700 |   |
| 2.41133800 |             |             |   |
| H          | 0.32147400  | -8.76592700 |   |
| 0.51402200 |             |             |   |
| C          | 5.25500000  | 0.08947400  |   |
| 0.02049000 |             |             |   |
| C          | 5.84940700  | 0.61933800  | - |
| 1.13569700 |             |             |   |
| C          | 6.08642400  | -0.43363700 |   |
| 1.02342100 |             |             |   |
| C          | 7.23670800  | 0.62536900  | - |
| 1.28574900 |             |             |   |
| H          | 5.21189500  | 1.02390700  | - |
| 1.91674300 |             |             |   |
| C          | 7.47387200  | -0.42795000 |   |
| 0.87450300 |             |             |   |
| H          | 5.63370900  | -0.84236200 |   |

|            |             |             |   |
|------------|-------------|-------------|---|
| 1.92238500 |             |             |   |
| C          | 8.05347400  | 0.10153900  | - |
| 0.28090100 |             |             |   |
| H          | 7.67915500  | 1.03531200  | - |
| 2.18991400 |             |             |   |
| H          | 8.10211800  | -0.83297800 |   |
| 1.66352200 |             |             |   |
| H          | 9.13396100  | 0.10605800  | - |
| 0.39728000 |             |             |   |
| C          | 0.31167300  | 5.02955300  |   |
| 0.37955400 |             |             |   |
| C          | 0.75851500  | 5.70516800  | - |
| 0.76719300 |             |             |   |
| C          | -0.14062900 | 5.78778500  |   |
| 1.47117300 |             |             |   |
| C          | 0.75230600  | 7.09951000  | - |
| 0.82219400 |             |             |   |
| H          | 1.11123900  | 5.12522500  | - |
| 1.61551400 |             |             |   |
| C          | -0.14758000 | 7.18214200  |   |
| 1.41735600 |             |             |   |
| H          | -0.48349100 | 5.27239600  |   |
| 2.36386800 |             |             |   |
| C          | 0.29855300  | 7.84259900  |   |
| 0.27011400 |             |             |   |
| H          | 1.09877500  | 7.60508900  | - |
| 1.71979800 |             |             |   |
| H          | -0.49636500 | 7.75262500  |   |
| 2.27419900 |             |             |   |
| H          | 0.29386500  | 8.92850800  |   |
| 0.22818000 |             |             |   |
| C          | -4.59674100 | 0.06336200  |   |
| 0.97124900 |             |             |   |
| C          | -5.36764400 | -0.49832600 | - |
| 0.05907000 |             |             |   |
| C          | -5.25776000 | 0.62056100  |   |
| 2.07683000 |             |             |   |
| C          | -6.76107000 | -0.50139900 |   |
| 0.01331600 |             |             |   |
| H          | -4.86182200 | -0.92670800 | - |
| 0.91888800 |             |             |   |
| C          | -6.65155000 | 0.61882400  |   |
| 2.14971200 |             |             |   |
| H          | -4.66775600 | 1.05309200  |   |

|             |             |             |   |
|-------------|-------------|-------------|---|
| 2.87989100  |             |             |   |
| C           | -7.40796100 | 0.05807900  |   |
| 1.11786100  |             |             |   |
| H           | -7.34214400 | -0.93833600 | - |
| 0.79496500  |             |             |   |
| H           | -7.14628300 | 1.05068300  |   |
| 3.01573300  |             |             |   |
| H           | -8.49319400 | 0.05578600  |   |
| 1.17504100  |             |             |   |
| <b>4TS1</b> |             |             |   |
| N           | -1.10388800 | -1.33869200 |   |
| 0.71357900  |             |             |   |
| C           | 3.78237900  | 0.04199600  |   |
| 0.22132300  |             |             |   |
| C           | 0.30706900  | -3.37333900 |   |
| 0.59155900  |             |             |   |
| C           | 2.79440900  | -3.42435500 |   |
| 0.21749500  |             |             |   |
| C           | 3.76251900  | -2.47330200 |   |
| 0.11565400  |             |             |   |
| C           | 1.54595000  | -2.73314100 |   |
| 0.43968400  |             |             |   |
| C           | 3.11383300  | -1.19159300 |   |
| 0.27177300  |             |             |   |
| H           | 4.81711900  | -2.61941900 | - |
| 0.06626000  |             |             |   |
| H           | 2.90669200  | -4.49555300 |   |
| 0.13608900  |             |             |   |
| N           | -1.07650900 | 1.53131900  |   |
| 0.66301700  |             |             |   |
| N           | 1.75968200  | -1.37112200 |   |
| 0.45272300  |             |             |   |
| N           | 1.78021100  | 1.49899100  |   |
| 0.33269200  |             |             |   |
| C           | -3.10039700 | 0.11595900  |   |
| 0.90431000  |             |             |   |
| C           | 0.36564100  | 3.53295000  |   |
| 0.39133000  |             |             |   |
| C           | 2.88220300  | 3.53006500  |   |
| 0.34678800  |             |             |   |
| C           | -2.17498000 | -3.36639000 |   |
| 0.99764600  |             |             |   |
| C           | -2.15027700 | 3.56995100  |   |

|            |             |             |   |
|------------|-------------|-------------|---|
| 0.49736600 |             |             |   |
| C          | 3.83367900  | 2.55769000  |   |
| 0.30728100 |             |             |   |
| C          | -3.12413200 | -2.39532500 |   |
| 1.09156100 |             |             |   |
| C          | -3.11346700 | 2.61931300  |   |
| 0.66033900 |             |             |   |
| C          | 1.59984000  | 2.86507100  |   |
| 0.35277200 |             |             |   |
| C          | -0.91562100 | -2.70330400 |   |
| 0.75384500 |             |             |   |
| C          | -0.87739100 | 2.88978700  |   |
| 0.51852400 |             |             |   |
| C          | 3.14132800  | 1.29000000  |   |
| 0.28278600 |             |             |   |
| C          | -2.45412200 | -1.12986400 |   |
| 0.89912500 |             |             |   |
| C          | -2.43989200 | 1.34857700  |   |
| 0.77140900 |             |             |   |
| H          | 4.90668100  | 2.68140300  |   |
| 0.30928100 |             |             |   |
| H          | -4.17885500 | -2.51797800 |   |
| 1.28961400 |             |             |   |
| H          | -4.18387000 | 2.76166700  |   |
| 0.68689100 |             |             |   |
| H          | 3.02975700  | 4.59930000  |   |
| 0.38869300 |             |             |   |
| H          | -2.30552900 | -4.43370800 |   |
| 1.10068300 |             |             |   |
| H          | -2.28670400 | 4.63377800  |   |
| 0.36893000 |             |             |   |
| N          | -0.06859200 | -0.34694300 | - |
| 2.05376200 |             |             |   |
| N          | 0.14695100  | -1.61134400 | - |
| 2.29943200 |             |             |   |
| N          | -0.49686600 | -2.47920600 | - |
| 2.75292200 |             |             |   |
| C          | -1.39048300 | -0.11243000 | - |
| 2.48230500 |             |             |   |
| C          | -1.97764400 | 1.16307100  | - |
| 2.38115200 |             |             |   |
| C          | -3.33106800 | -1.03497500 | - |
| 3.37998800 |             |             |   |
| C          | -3.29348500 | 1.29294400  | - |

|            |             |             |   |
|------------|-------------|-------------|---|
| 2.78743800 |             |             |   |
| H          | -1.40915100 | 1.98558000  | - |
| 1.96639000 |             |             |   |
| C          | -3.99195600 | 0.18123900  | - |
| 3.29730600 |             |             |   |
| H          | -3.80161000 | -1.93381700 | - |
| 3.76725000 |             |             |   |
| H          | -3.78849800 | 2.25477700  | - |
| 2.69783900 |             |             |   |
| H          | -5.02499500 | 0.26358200  | - |
| 3.61738600 |             |             |   |
| N          | -2.05744100 | -1.14892400 | - |
| 2.97526700 |             |             |   |
| Mn         | 0.33583500  | 0.08008600  |   |
| 0.44906400 |             |             |   |
| C          | 0.27862900  | -4.86694200 |   |
| 0.54595300 |             |             |   |
| C          | -0.33930000 | -5.52660400 | - |
| 0.52818700 |             |             |   |
| C          | 0.86587200  | -5.63437800 |   |
| 1.56296700 |             |             |   |
| C          | -0.36932900 | -6.92071500 | - |
| 0.58200500 |             |             |   |
| H          | -0.78544200 | -4.93407000 | - |
| 1.32195100 |             |             |   |
| C          | 0.83517000  | -7.02876800 |   |
| 1.50936100 |             |             |   |
| H          | 1.34400900  | -5.12787700 |   |
| 2.39679400 |             |             |   |
| C          | 0.21692400  | -7.67580400 |   |
| 0.43679100 |             |             |   |
| H          | -0.84661100 | -7.41723000 | - |
| 1.42290400 |             |             |   |
| H          | 1.29050800  | -7.60923800 |   |
| 2.30751900 |             |             |   |
| H          | 0.19300100  | -8.76153000 |   |
| 0.39484200 |             |             |   |
| C          | 5.27084200  | 0.02578000  |   |
| 0.09019500 |             |             |   |
| C          | 5.89506000  | 0.54370900  | - |
| 1.05566000 |             |             |   |
| C          | 6.07480800  | -0.50874300 |   |
| 1.10933400 |             |             |   |
| C          | 7.28489300  | 0.52810800  | - |



|            |             |             |   |
|------------|-------------|-------------|---|
| 1.17919300 |             |             |   |
| H          | 5.27885400  | 0.95562000  | - |
| 1.84983900 |             |             |   |
| C          | 7.46476600  | -0.52470200 |   |
| 0.98685200 |             |             |   |
| H          | 5.59879600  | -0.90939400 |   |
| 1.99987700 |             |             |   |
| C          | 8.07426300  | -0.00615900 | - |
| 0.15805700 |             |             |   |
| H          | 7.75068200  | 0.92904300  | - |
| 2.07562900 |             |             |   |
| H          | 8.07156400  | -0.93825600 |   |
| 1.78813100 |             |             |   |
| H          | 9.15669700  | -0.01849600 | - |
| 0.25390900 |             |             |   |
| C          | 0.37627900  | 5.02448500  |   |
| 0.30186100 |             |             |   |
| C          | 0.83774600  | 5.66712200  | - |
| 0.85801000 |             |             |   |
| C          | -0.07192100 | 5.81383400  |   |
| 1.37293800 |             |             |   |
| C          | 0.84916600  | 7.05973300  | - |
| 0.94591700 |             |             |   |
| H          | 1.18754900  | 5.06292200  | - |
| 1.69045300 |             |             |   |
| C          | -0.06105400 | 7.20651000  |   |
| 1.28619500 |             |             |   |
| H          | -0.42535800 | 5.32409600  |   |
| 2.27588400 |             |             |   |
| C          | 0.39911600  | 7.83400600  |   |
| 0.12607600 |             |             |   |
| H          | 1.20656300  | 7.53959100  | - |
| 1.85328700 |             |             |   |
| H          | -0.40685700 | 7.80140500  |   |
| 2.12749800 |             |             |   |
| H          | 0.40823400  | 8.91858700  |   |
| 0.05850500 |             |             |   |
| C          | -4.58877500 | 0.13367500  |   |
| 1.03264300 |             |             |   |
| C          | -5.39850100 | -0.43716000 |   |
| 0.03758900 |             |             |   |
| C          | -5.20925000 | 0.72629000  |   |
| 2.14366500 |             |             |   |
| C          | -6.78910200 | -0.41523900 |   |

|                        |             |             |   |
|------------------------|-------------|-------------|---|
| 0.14963800             |             |             |   |
| H                      | -4.92474100 | -0.89192400 | - |
| 0.82665200             |             |             |   |
| C                      | -6.60009800 | 0.74964800  |   |
| 2.25618100             |             |             |   |
| H                      | -4.58966900 | 1.16659300  |   |
| 2.91975300             |             |             |   |
| C                      | -7.39496300 | 0.17911200  |   |
| 1.25919100             |             |             |   |
| H                      | -7.40008400 | -0.85971700 | - |
| 0.63204100             |             |             |   |
| H                      | -7.06252000 | 1.20880700  |   |
| 3.12599800             |             |             |   |
| H                      | -8.47799400 | 0.19640300  |   |
| 1.34711900             |             |             |   |
| <b><sup>6</sup>TS1</b> |             |             |   |
| N                      | -1.23334000 | -1.26069400 |   |
| 0.73737800             |             |             |   |
| C                      | 3.80717900  | -0.25041900 |   |
| 0.18881400             |             |             |   |
| C                      | 0.05214300  | -3.38151500 |   |
| 0.63875500             |             |             |   |
| C                      | 2.54656300  | -3.65456300 |   |
| 0.22200900             |             |             |   |
| C                      | 3.59039200  | -2.78518000 |   |
| 0.10058700             |             |             |   |
| C                      | 1.35601100  | -2.86228000 |   |
| 0.46061800             |             |             |   |
| C                      | 3.05352300  | -1.44688500 |   |
| 0.25736900             |             |             |   |
| H                      | 4.62501500  | -3.02662200 | - |
| 0.09573500             |             |             |   |
| H                      | 2.57746700  | -4.73178300 |   |
| 0.14471900             |             |             |   |
| N                      | -0.95693300 | 1.67601100  |   |
| 0.69148900             |             |             |   |
| N                      | 1.69886100  | -1.53263600 |   |
| 0.46075700             |             |             |   |
| N                      | 1.95725500  | 1.40620700  |   |
| 0.24584800             |             |             |   |
| C                      | -3.07010300 | 0.39050800  |   |
| 0.94773000             |             |             |   |
| C                      | 0.67575100  | 3.52722300  |   |

|            |             |             |   |
|------------|-------------|-------------|---|
| 0.38149800 |             |             |   |
| C          | 3.21167800  | 3.32546200  |   |
| 0.37372000 |             |             |   |
| C          | -2.43811500 | -3.17923500 |   |
| 1.11575600 |             |             |   |
| C          | -1.85471500 | 3.78031900  |   |
| 0.48567000 |             |             |   |
| C          | 4.08087800  | 2.27543000  |   |
| 0.32497000 |             |             |   |
| C          | -3.30639900 | -2.13153800 |   |
| 1.20677300 |             |             |   |
| C          | -2.89314800 | 2.90991800  |   |
| 0.66037200 |             |             |   |
| C          | 1.87209400  | 2.77361700  |   |
| 0.32264800 |             |             |   |
| C          | -1.13183200 | -2.62622000 |   |
| 0.81299800 |             |             |   |
| C          | -0.63333200 | 3.00195700  |   |
| 0.52016100 |             |             |   |
| C          | 3.28652700  | 1.06552600  |   |
| 0.23890300 |             |             |   |
| C          | -2.54436300 | -0.92232100 |   |
| 0.95693200 |             |             |   |
| C          | -2.32419700 | 1.58559900  |   |
| 0.79859600 |             |             |   |
| H          | 5.15964300  | 2.31407700  |   |
| 0.37133400 |             |             |   |
| H          | -4.35987800 | -2.17065000 |   |
| 1.44391600 |             |             |   |
| H          | -3.94746300 | 3.14562400  |   |
| 0.68054700 |             |             |   |
| H          | 3.45385300  | 4.37426700  |   |
| 0.46794000 |             |             |   |
| H          | -2.65476500 | -4.22766400 |   |
| 1.26214500 |             |             |   |
| H          | -1.91389200 | 4.84929400  |   |
| 0.33953300 |             |             |   |
| N          | -0.22580700 | -0.42180800 | - |
| 2.07325200 |             |             |   |
| N          | -0.06366100 | -1.68411700 | - |
| 2.36260800 |             |             |   |
| N          | -0.72130200 | -2.51083800 | - |
| 2.86020400 |             |             |   |
| C          | -1.53435700 | -0.10093200 | - |

|            |             |             |   |
|------------|-------------|-------------|---|
| 2.50879200 |             |             |   |
| C          | -2.05477900 | 1.19586200  | - |
| 2.35075400 |             |             |   |
| C          | -3.50247100 | -0.88325400 | - |
| 3.46456900 |             |             |   |
| C          | -3.36040300 | 1.40890800  | - |
| 2.75945800 |             |             |   |
| H          | -1.45245300 | 1.97087100  | - |
| 1.89379400 |             |             |   |
| C          | -4.10528100 | 0.35882600  | - |
| 3.32671100 |             |             |   |
| H          | -4.01241600 | -1.73781200 | - |
| 3.89886200 |             |             |   |
| H          | -3.80844100 | 2.38824200  | - |
| 2.62505600 |             |             |   |
| H          | -5.13043300 | 0.50583900  | - |
| 3.64875700 |             |             |   |
| N          | -2.24048400 | -1.07965800 | - |
| 3.05572700 |             |             |   |
| Mn         | 0.33803300  | 0.06436600  |   |
| 0.20723900 |             |             |   |
| C          | -0.09720400 | -4.86869500 |   |
| 0.62121600 |             |             |   |
| C          | -0.82947700 | -5.49260000 | - |
| 0.40176200 |             |             |   |
| C          | 0.48670500  | -5.66887700 |   |
| 1.61548300 |             |             |   |
| C          | -0.97368000 | -6.88020600 | - |
| 0.42900200 |             |             |   |
| H          | -1.27477700 | -4.87798600 | - |
| 1.17914700 |             |             |   |
| C          | 0.34190400  | -7.05664400 |   |
| 1.58903700 |             |             |   |
| H          | 1.05153600  | -5.19159100 |   |
| 2.41131300 |             |             |   |
| C          | -0.38910500 | -7.66655700 |   |
| 0.56675000 |             |             |   |
| H          | -1.53866700 | -7.34758100 | - |
| 1.23138600 |             |             |   |
| H          | 0.79612000  | -7.66090100 |   |
| 2.37000900 |             |             |   |
| H          | -0.50184900 | -8.74728200 |   |
| 0.54604800 |             |             |   |
| C          | 5.28979000  | -0.38628000 |   |

|            |             |             |   |
|------------|-------------|-------------|---|
| 0.06426900 |             |             |   |
| C          | 5.96592100  | 0.13036700  | - |
| 1.05315000 |             |             |   |
| C          | 6.04027300  | -1.02973900 |   |
| 1.06203200 |             |             |   |
| C          | 7.35060000  | 0.00602400  | - |
| 1.17078900 |             |             |   |
| H          | 5.39307000  | 0.62723400  | - |
| 1.83095600 |             |             |   |
| C          | 7.42502200  | -1.15426200 |   |
| 0.94559800 |             |             |   |
| H          | 5.52643500  | -1.42677900 |   |
| 1.93279900 |             |             |   |
| C          | 8.08504400  | -0.63700600 | - |
| 0.17161300 |             |             |   |
| H          | 7.85510800  | 0.40748200  | - |
| 2.04581200 |             |             |   |
| H          | 7.98903200  | -1.65055400 |   |
| 1.73103200 |             |             |   |
| H          | 9.16363700  | -0.73383000 | - |
| 0.26259700 |             |             |   |
| C          | 0.80968300  | 5.01327000  |   |
| 0.31027400 |             |             |   |
| C          | 1.38110700  | 5.62686700  | - |
| 0.81678300 |             |             |   |
| C          | 0.37416000  | 5.82975500  |   |
| 1.36718500 |             |             |   |
| C          | 1.51005500  | 7.01433100  | - |
| 0.88728200 |             |             |   |
| H          | 1.72172200  | 5.00337600  | - |
| 1.63862100 |             |             |   |
| C          | 0.50284800  | 7.21725100  |   |
| 1.29793800 |             |             |   |
| H          | -0.06049000 | 5.36383800  |   |
| 2.24685100 |             |             |   |
| C          | 1.07057400  | 7.81458600  |   |
| 0.16992300 |             |             |   |
| H          | 1.95064400  | 7.47034400  | - |
| 1.77006500 |             |             |   |
| H          | 0.16563400  | 7.83144700  |   |
| 2.12882500 |             |             |   |
| H          | 1.17141400  | 8.89529200  |   |
| 0.11607000 |             |             |   |
| C          | -4.55214300 | 0.52899500  |   |

|                         |             |             |   |
|-------------------------|-------------|-------------|---|
| 1.07354400              |             |             |   |
| C                       | -5.40437300 | -0.02946100 |   |
| 0.10631800              |             |             |   |
| C                       | -5.12713900 | 1.22442900  |   |
| 2.14948700              |             |             |   |
| C                       | -6.78912600 | 0.10519800  |   |
| 0.21029500              |             |             |   |
| H                       | -4.96739000 | -0.56476300 | - |
| 0.73090700              |             |             |   |
| C                       | -6.51200200 | 1.36027600  |   |
| 2.25410900              |             |             |   |
| H                       | -4.47635000 | 1.65422400  |   |
| 2.90552600              |             |             |   |
| C                       | -7.34821300 | 0.80170800  |   |
| 1.28440700              |             |             |   |
| H                       | -7.43192400 | -0.33152900 | - |
| 0.55000500              |             |             |   |
| H                       | -6.93816300 | 1.89745900  |   |
| 3.09737500              |             |             |   |
| H                       | -8.42674300 | 0.90675000  |   |
| 1.36647200              |             |             |   |
| <b><sup>2</sup>INT1</b> |             |             |   |
| Mn                      | -0.28972700 | 0.14899100  | - |
| 0.50200300              |             |             |   |
| N                       | -2.30353500 | 0.28226900  | - |
| 0.35611900              |             |             |   |
| C                       | 1.95913500  | -2.44650300 | - |
| 0.72383400              |             |             |   |
| C                       | -2.90805100 | -2.11483000 | - |
| 0.56670100              |             |             |   |
| C                       | -1.28026100 | -4.01183200 | - |
| 0.87922200              |             |             |   |
| C                       | 0.07797500  | -4.10626600 | - |
| 0.86982400              |             |             |   |
| C                       | -1.60649600 | -2.61402000 | - |
| 0.72325700              |             |             |   |
| C                       | 0.59286600  | -2.76402800 | - |
| 0.74455000              |             |             |   |
| H                       | 0.68334300  | -4.99636700 | - |
| 0.96123600              |             |             |   |
| H                       | -1.99979300 | -4.81155300 | - |
| 0.97463100              |             |             |   |
| N                       | -0.13789600 | 2.16209700  | - |

|            |             |             |   |  |
|------------|-------------|-------------|---|--|
| 0.41736800 |             |             |   |  |
| N          | -0.44905700 | -1.86467100 | - |  |
| 0.67792100 |             |             |   |  |
| N          | 1.71137600  | 0.01681600  | - |  |
| 0.80750200 |             |             |   |  |
| C          | -2.52262900 | 2.73001300  | - |  |
| 0.03540500 |             |             |   |  |
| C          | 2.29612400  | 2.42506300  | - |  |
| 0.81126300 |             |             |   |  |
| C          | 3.96017300  | 0.54302900  | - |  |
| 0.89154600 |             |             |   |  |
| C          | -4.52810300 | -0.26469900 | - |  |
| 0.04688700 |             |             |   |  |
| C          | 0.66234400  | 4.32514500  | - |  |
| 0.57815800 |             |             |   |  |
| C          | 3.86888100  | -0.81336600 | - |  |
| 0.81849300 |             |             |   |  |
| C          | -4.41734900 | 1.08070600  |   |  |
| 0.12932600 |             |             |   |  |
| C          | -0.67648100 | 4.40862700  | - |  |
| 0.34381900 |             |             |   |  |
| C          | 2.61259400  | 1.05894500  | - |  |
| 0.87124600 |             |             |   |  |
| C          | -3.20811400 | -0.76068100 | - |  |
| 0.35339900 |             |             |   |  |
| C          | 0.99922400  | 2.92247700  | - |  |
| 0.61181600 |             |             |   |  |
| C          | 2.46461000  | -1.14067900 | - |  |
| 0.78390600 |             |             |   |  |
| C          | -3.03131600 | 1.42263600  | - |  |
| 0.08567900 |             |             |   |  |
| C          | -1.17361100 | 3.05784000  | - |  |
| 0.24125100 |             |             |   |  |
| H          | 4.67566100  | -1.53026600 | - |  |
| 0.78124600 |             |             |   |  |
| H          | -5.19832300 | 1.78008700  |   |  |
| 0.38900900 |             |             |   |  |
| H          | -1.28104900 | 5.30070300  | - |  |
| 0.27011200 |             |             |   |  |
| H          | 4.85679700  | 1.14444800  | - |  |
| 0.92175000 |             |             |   |  |
| H          | -5.41557400 | -0.87399500 |   |  |
| 0.04177200 |             |             |   |  |
| H          | 1.35916000  | 5.13611500  | - |  |

|            |             |             |   |
|------------|-------------|-------------|---|
| 0.73196100 |             |             |   |
| N          | 0.02754300  | -0.49045400 |   |
| 2.05857000 |             |             |   |
| N          | -0.61418000 | -1.53243900 |   |
| 2.30073500 |             |             |   |
| N          | -1.31550500 | -2.40933500 |   |
| 2.45481400 |             |             |   |
| C          | 1.40216200  | -0.51013100 |   |
| 2.41519300 |             |             |   |
| C          | 2.10183200  | 0.69302400  |   |
| 2.26388400 |             |             |   |
| C          | 3.25823700  | -1.63843000 |   |
| 3.10629500 |             |             |   |
| C          | 3.46151800  | 0.68249500  |   |
| 2.54482100 |             |             |   |
| H          | 1.58823200  | 1.57298300  |   |
| 1.89495800 |             |             |   |
| C          | 4.05890800  | -0.50558000 |   |
| 2.97940100 |             |             |   |
| H          | 3.68305000  | -2.58599400 |   |
| 3.43018700 |             |             |   |
| H          | 4.04963500  | 1.58538000  |   |
| 2.40856700 |             |             |   |
| H          | 5.11978300  | -0.55599200 |   |
| 3.20134700 |             |             |   |
| N          | 1.94651900  | -1.65481700 |   |
| 2.82832300 |             |             |   |
| C          | -3.47805700 | 3.84955300  |   |
| 0.22401000 |             |             |   |
| C          | -3.36948700 | 4.62283900  |   |
| 1.39050800 |             |             |   |
| C          | -4.49593100 | 4.15604700  | - |
| 0.69282200 |             |             |   |
| C          | -4.25605600 | 5.67220200  |   |
| 1.63567800 |             |             |   |
| H          | -2.58426300 | 4.39101600  |   |
| 2.10461400 |             |             |   |
| C          | -5.38304500 | 5.20515300  | - |
| 0.44866800 |             |             |   |
| H          | -4.58261600 | 3.56556400  | - |
| 1.60052700 |             |             |   |
| C          | -5.26606100 | 5.96635800  |   |
| 0.71673900 |             |             |   |
| H          | -4.16013600 | 6.25715300  |   |



|            |             |             |   |
|------------|-------------|-------------|---|
| 2.54665600 |             |             |   |
| H          | -6.16238200 | 5.43101100  | - |
| 1.17174300 |             |             |   |
| H          | -5.95678100 | 6.78343100  |   |
| 0.90707800 |             |             |   |
| C          | -4.04065800 | -3.08989900 | - |
| 0.56029400 |             |             |   |
| C          | -5.00541100 | -3.07350600 | - |
| 1.57894300 |             |             |   |
| C          | -4.16492800 | -4.03161000 |   |
| 0.47340000 |             |             |   |
| C          | -6.06691600 | -3.97959500 | - |
| 1.56799300 |             |             |   |
| H          | -4.91432600 | -2.34543500 | - |
| 2.38025400 |             |             |   |
| C          | -5.22660900 | -4.93716900 |   |
| 0.48450700 |             |             |   |
| H          | -3.42476900 | -4.04098600 |   |
| 1.26837600 |             |             |   |
| C          | -6.18008300 | -4.91443000 | - |
| 0.53630600 |             |             |   |
| H          | -6.80317100 | -3.95719000 | - |
| 2.36717300 |             |             |   |
| H          | -5.31149700 | -5.65737600 |   |
| 1.29406400 |             |             |   |
| H          | -7.00661200 | -5.61999300 | - |
| 0.52733100 |             |             |   |
| C          | 2.92669500  | -3.57771900 | - |
| 0.59577800 |             |             |   |
| C          | 2.97368100  | -4.30867800 |   |
| 0.60251300 |             |             |   |
| C          | 3.79342900  | -3.93055200 | - |
| 1.64006000 |             |             |   |
| C          | 3.87186800  | -5.36606500 |   |
| 0.75161400 |             |             |   |
| H          | 2.30721800  | -4.02695000 |   |
| 1.41279900 |             |             |   |
| C          | 4.69165200  | -4.98881200 | - |
| 1.48989500 |             |             |   |
| H          | 3.75493200  | -3.37164100 | - |
| 2.57099200 |             |             |   |
| C          | 4.73355900  | -5.70881800 | - |
| 0.29364400 |             |             |   |
| H          | 3.89981300  | -5.92172700 |   |

|                         |             |             |   |
|-------------------------|-------------|-------------|---|
| 1.68548200              |             |             |   |
| H                       | 5.35433200  | -5.25404400 | - |
| 2.30954000              |             |             |   |
| H                       | 5.43219000  | -6.53318900 | - |
| 0.17758900              |             |             |   |
| C                       | 3.42176500  | 3.40322000  | - |
| 0.90007500              |             |             |   |
| C                       | 4.18038300  | 3.52457500  | - |
| 2.07446300              |             |             |   |
| C                       | 3.75677500  | 4.20743800  |   |
| 0.20137700              |             |             |   |
| C                       | 5.24446300  | 4.42477400  | - |
| 2.14593000              |             |             |   |
| H                       | 3.92696900  | 2.90628600  | - |
| 2.93094600              |             |             |   |
| C                       | 4.82034600  | 5.10808000  |   |
| 0.13135400              |             |             |   |
| H                       | 3.17239900  | 4.12095800  |   |
| 1.11362600              |             |             |   |
| C                       | 5.56818000  | 5.21897600  | - |
| 1.04329300              |             |             |   |
| H                       | 5.81827600  | 4.50849400  | - |
| 3.06510400              |             |             |   |
| H                       | 5.06673800  | 5.72022800  |   |
| 0.99500300              |             |             |   |
| H                       | 6.39670300  | 5.91985600  | - |
| 1.09925400              |             |             |   |
| <b><sup>4</sup>INT1</b> |             |             |   |
| Mn                      | -0.28305300 | 0.15047600  | - |
| 0.54107700              |             |             |   |
| N                       | 1.70337000  | -0.03725800 | - |
| 0.78718700              |             |             |   |
| C                       | -2.43552700 | 2.78017200  |   |
| 0.01632300              |             |             |   |
| C                       | 2.36129600  | 2.34985700  | - |
| 0.87177700              |             |             |   |
| C                       | 0.78127400  | 4.28853700  | - |
| 0.60572600              |             |             |   |
| C                       | -0.55066200 | 4.40594300  | - |
| 0.32240300              |             |             |   |
| C                       | 1.07949500  | 2.88661400  | - |
| 0.66095500              |             |             |   |
| C                       | -1.08133200 | 3.07737300  | - |

|            |             |             |   |  |
|------------|-------------|-------------|---|--|
| 0.22026200 |             |             |   |  |
| H          | -1.12712500 | 5.31297800  | - |  |
| 0.21486700 |             |             |   |  |
| H          | 1.49570000  | 5.08176000  | - |  |
| 0.76973800 |             |             |   |  |
| N          | -0.49122800 | -1.85424200 | - |  |
| 0.67450700 |             |             |   |  |
| N          | -0.07518600 | 2.15582300  | - |  |
| 0.44011600 |             |             |   |  |
| N          | -2.27025500 | 0.33692600  | - |  |
| 0.35277000 |             |             |   |  |
| C          | 1.90447600  | -2.50074400 | - |  |
| 0.64865800 |             |             |   |  |
| C          | -2.96084700 | -2.02966800 | - |  |
| 0.62851600 |             |             |   |  |
| C          | -4.52169200 | -0.14600000 | - |  |
| 0.07645300 |             |             |   |  |
| C          | 3.97182600  | 0.42756100  | - |  |
| 0.90452200 |             |             |   |  |
| C          | -1.37877100 | -3.96744300 | - |  |
| 0.90146300 |             |             |   |  |
| C          | -4.37133800 | 1.18298800  | - |  |
| 0.14346700 |             |             |   |  |
| C          | 3.84880900  | -0.91617800 | - |  |
| 0.77462000 |             |             |   |  |
| C          | -0.02024900 | -4.10188700 | - |  |
| 0.83761600 |             |             |   |  |
| C          | -3.21261600 | -0.67916500 | - |  |
| 0.38905300 |             |             |   |  |
| C          | 2.63470900  | 0.98221100  | - |  |
| 0.89468900 |             |             |   |  |
| C          | -1.67061200 | -2.56958800 | - |  |
| 0.76158800 |             |             |   |  |
| C          | -2.97107400 | 1.49483700  | - |  |
| 0.05427100 |             |             |   |  |
| C          | 2.43393000  | -1.21447200 | - |  |
| 0.72741500 |             |             |   |  |
| C          | 0.52887700  | -2.78421700 | - |  |
| 0.69927900 |             |             |   |  |
| H          | -5.13011900 | 1.90094300  | - |  |
| 0.41727800 |             |             |   |  |
| H          | 4.63578200  | -1.65292400 | - |  |
| 0.71357300 |             |             |   |  |
| H          | 0.56115200  | -5.01017100 | - |  |

|            |             |             |   |
|------------|-------------|-------------|---|
| 0.89966800 |             |             |   |
| H          | -5.42561400 | -0.73371500 | - |
| 0.01397900 |             |             |   |
| H          | 4.87980400  | 1.00899300  | - |
| 0.96533100 |             |             |   |
| H          | -2.11742000 | -4.74693400 | - |
| 1.01495200 |             |             |   |
| N          | -0.01656000 | -0.43600900 |   |
| 2.08665400 |             |             |   |
| N          | -0.70331800 | -1.45047200 |   |
| 2.31811200 |             |             |   |
| N          | -1.44329000 | -2.29693500 |   |
| 2.46314500 |             |             |   |
| C          | 1.35616200  | -0.51421700 |   |
| 2.43647500 |             |             |   |
| C          | 2.10887300  | 0.65389500  |   |
| 2.26119600 |             |             |   |
| C          | 3.16451700  | -1.71207700 |   |
| 3.13794000 |             |             |   |
| C          | 3.46773200  | 0.58768600  |   |
| 2.53678700 |             |             |   |
| H          | 1.63358100  | 1.54901600  |   |
| 1.87763200 |             |             |   |
| C          | 4.01411100  | -0.61847700 |   |
| 2.98879500 |             |             |   |
| H          | 3.54891300  | -2.67231100 |   |
| 3.47470200 |             |             |   |
| H          | 4.09506800  | 1.46069800  |   |
| 2.38227200 |             |             |   |
| H          | 5.07281300  | -0.71248800 |   |
| 3.20687200 |             |             |   |
| N          | 1.85172600  | -1.67488900 |   |
| 2.86651500 |             |             |   |
| C          | 3.51071800  | 3.29565200  | - |
| 1.00089700 |             |             |   |
| C          | 4.23557100  | 3.38569900  | - |
| 2.19871200 |             |             |   |
| C          | 3.90186800  | 4.09712400  |   |
| 0.08349400 |             |             |   |
| C          | 5.32280000  | 4.25386600  | - |
| 2.30993500 |             |             |   |
| H          | 3.93866400  | 2.76784900  | - |
| 3.04148200 |             |             |   |
| C          | 4.98829600  | 4.96589800  | - |

|            |             |             |   |
|------------|-------------|-------------|---|
| 0.02636200 |             |             |   |
| H          | 3.34336100  | 4.03412100  |   |
| 1.01366500 |             |             |   |
| C          | 5.70259700  | 5.04637400  | - |
| 1.22422700 |             |             |   |
| H          | 5.87093400  | 4.31354400  | - |
| 3.24648000 |             |             |   |
| H          | 5.27885600  | 5.57683400  |   |
| 0.82430800 |             |             |   |
| H          | 6.54891500  | 5.72241900  | - |
| 1.31100800 |             |             |   |
| C          | -3.35070200 | 3.92197300  |   |
| 0.31992600 |             |             |   |
| C          | -3.20290400 | 4.65328700  |   |
| 1.50867500 |             |             |   |
| C          | -4.36402600 | 4.29367900  | - |
| 0.57708000 |             |             |   |
| C          | -4.04932300 | 5.72489000  |   |
| 1.79595100 |             |             |   |
| H          | -2.41913000 | 4.37173700  |   |
| 2.20631600 |             |             |   |
| C          | -5.21123400 | 5.36501100  | - |
| 0.29063700 |             |             |   |
| H          | -4.47934700 | 3.73612300  | - |
| 1.50227000 |             |             |   |
| C          | -5.05664400 | 6.08362000  |   |
| 0.89714200 |             |             |   |
| H          | -3.92411300 | 6.27703600  |   |
| 2.72368300 |             |             |   |
| H          | -5.98855800 | 5.64136700  | - |
| 0.99816400 |             |             |   |
| H          | -5.71602600 | 6.91808200  |   |
| 1.12034600 |             |             |   |
| C          | -4.12429100 | -2.96695100 | - |
| 0.66462700 |             |             |   |
| C          | -5.05301400 | -2.91379900 | - |
| 1.71444700 |             |             |   |
| C          | -4.31431800 | -3.90670700 |   |
| 0.36055200 |             |             |   |
| C          | -6.14483900 | -3.78298700 | - |
| 1.74236800 |             |             |   |
| H          | -4.91093000 | -2.18588600 | - |
| 2.50848800 |             |             |   |
| C          | -5.40596900 | -4.77547500 |   |

|              |             |             |   |
|--------------|-------------|-------------|---|
| 0.33270500   |             |             |   |
| H            | -3.60140400 | -3.94343700 |   |
| 1.17937800   |             |             |   |
| C            | -6.32369400 | -4.71670600 | - |
| 0.71911200   |             |             |   |
| H            | -6.85353400 | -3.73237300 | - |
| 2.56482400   |             |             |   |
| H            | -5.54240700 | -5.49487800 |   |
| 1.13589200   |             |             |   |
| H            | -7.17370800 | -5.39352000 | - |
| 0.74039900   |             |             |   |
| C            | 2.83686400  | -3.65627700 | - |
| 0.48639600   |             |             |   |
| C            | 3.71535300  | -4.04671200 | - |
| 1.50710700   |             |             |   |
| C            | 2.83335800  | -4.37614300 |   |
| 0.71948500   |             |             |   |
| C            | 4.57847200  | -5.12894900 | - |
| 1.32511200   |             |             |   |
| H            | 3.71385500  | -3.49797000 | - |
| 2.44482900   |             |             |   |
| C            | 3.69625900  | -5.45763500 |   |
| 0.90024200   |             |             |   |
| H            | 2.15539800  | -4.06762100 |   |
| 1.51008900   |             |             |   |
| C            | 4.57180500  | -5.83649300 | - |
| 0.12081600   |             |             |   |
| H            | 5.25136100  | -5.42264800 | - |
| 2.12651800   |             |             |   |
| H            | 3.68559400  | -6.00420300 |   |
| 1.83980600   |             |             |   |
| H            | 5.24297100  | -6.67960500 |   |
| 0.01999000   |             |             |   |
| <b>6INT1</b> |             |             |   |
| Mn           | -0.30720700 | 0.12732800  | - |
| 0.32404000   |             |             |   |
| N            | -0.31372600 | 2.22374000  | - |
| 0.34279500   |             |             |   |
| C            | -2.78072100 | -2.33030800 | - |
| 0.48781000   |             |             |   |
| C            | -2.76315500 | 2.56858700  | - |
| 0.08571200   |             |             |   |
| C            | -4.55960400 | 0.77612700  |   |

|            |             |             |   |  |
|------------|-------------|-------------|---|--|
| 0.11231900 |             |             |   |  |
| C          | -4.56505100 | -0.58284000 | - |  |
| 0.00927800 |             |             |   |  |
| C          | -3.19959400 | 1.22193900  | - |  |
| 0.11586500 |             |             |   |  |
| C          | -3.20827200 | -0.99226000 | - |  |
| 0.31062200 |             |             |   |  |
| H          | -5.40762200 | -1.24848800 |   |  |
| 0.11026200 |             |             |   |  |
| H          | -5.39705900 | 1.41551100  |   |  |
| 0.35112500 |             |             |   |  |
| N          | 1.73729900  | 0.16264400  | - |  |
| 0.85073600 |             |             |   |  |
| N          | -2.40801100 | 0.12450000  | - |  |
| 0.35445200 |             |             |   |  |
| N          | -0.33975400 | -1.94616300 | - |  |
| 0.66842600 |             |             |   |  |
| C          | 2.10860100  | 2.61434800  | - |  |
| 0.73938600 |             |             |   |  |
| C          | 2.11207500  | -2.29299900 | - |  |
| 0.83013600 |             |             |   |  |
| C          | 0.34816300  | -4.12139600 | - |  |
| 0.92045800 |             |             |   |  |
| C          | -1.03037300 | 4.40390100  | - |  |
| 0.39242600 |             |             |   |  |
| C          | 3.93068800  | -0.51902800 | - |  |
| 0.87570300 |             |             |   |  |
| C          | -1.01490300 | -4.13170000 | - |  |
| 0.85709800 |             |             |   |  |
| C          | 0.32197100  | 4.41749900  | - |  |
| 0.57670200 |             |             |   |  |
| C          | 3.92976900  | 0.84507400  | - |  |
| 0.88133700 |             |             |   |  |
| C          | 0.77113800  | -2.74084500 | - |  |
| 0.80014200 |             |             |   |  |
| C          | -1.43036600 | 3.01934800  | - |  |
| 0.24650600 |             |             |   |  |
| C          | 2.54734700  | -0.94815000 | - |  |
| 0.86396600 |             |             |   |  |
| C          | -1.44544000 | -2.75917500 | - |  |
| 0.67347600 |             |             |   |  |
| C          | 0.77237400  | 3.04146500  | - |  |
| 0.54806200 |             |             |   |  |
| C          | 2.54536700  | 1.27273600  | - |  |

|            |             |             |   |  |
|------------|-------------|-------------|---|--|
| 0.85292500 |             |             |   |  |
| H          | -1.66917500 | -4.98827300 | - |  |
| 0.93012800 |             |             |   |  |
| H          | 0.95204900  | 5.27824300  | - |  |
| 0.74931600 |             |             |   |  |
| H          | 4.78887600  | 1.50004400  | - |  |
| 0.87211600 |             |             |   |  |
| H          | 1.00773800  | -4.96645500 | - |  |
| 1.05712900 |             |             |   |  |
| H          | -1.69964900 | 5.25207000  | - |  |
| 0.38654800 |             |             |   |  |
| H          | 4.78923600  | -1.17461200 | - |  |
| 0.86525600 |             |             |   |  |
| C          | -3.80858400 | 3.61887800  |   |  |
| 0.10858800 |             |             |   |  |
| C          | -4.84552500 | 3.78552600  | - |  |
| 0.82377700 |             |             |   |  |
| C          | -3.77110500 | 4.46706900  |   |  |
| 1.22719500 |             |             |   |  |
| C          | -5.81789300 | 4.76942500  | - |  |
| 0.64176300 |             |             |   |  |
| H          | -4.87829900 | 3.13846100  | - |  |
| 1.69565000 |             |             |   |  |
| C          | -4.74314200 | 5.45112600  |   |  |
| 1.41041200 |             |             |   |  |
| H          | -2.97320000 | 4.34416700  |   |  |
| 1.95409700 |             |             |   |  |
| C          | -5.77025400 | 5.60536200  |   |  |
| 0.47639900 |             |             |   |  |
| H          | -6.60964900 | 4.88663500  | - |  |
| 1.37703800 |             |             |   |  |
| H          | -4.70047100 | 6.09432700  |   |  |
| 2.28549500 |             |             |   |  |
| H          | -6.52750600 | 6.37174600  |   |  |
| 0.61839600 |             |             |   |  |
| C          | -3.83282200 | -3.39109000 | - |  |
| 0.43490900 |             |             |   |  |
| C          | -3.83250500 | -4.34582900 |   |  |
| 0.59488000 |             |             |   |  |
| C          | -4.84327400 | -3.45039800 | - |  |
| 1.40744200 |             |             |   |  |
| C          | -4.81584500 | -5.33438700 |   |  |
| 0.64865700 |             |             |   |  |
| H          | -3.05719500 | -4.30069200 |   |  |



|            |             |             |   |
|------------|-------------|-------------|---|
| 1.35438800 |             |             |   |
| C          | -5.82658600 | -4.43913200 | - |
| 1.35397000 |             |             |   |
| H          | -4.84803600 | -2.71558800 | - |
| 2.20763000 |             |             |   |
| C          | -5.81564800 | -5.38451000 | - |
| 0.32568100 |             |             |   |
| H          | -4.80348200 | -6.06265500 |   |
| 1.45538100 |             |             |   |
| H          | -6.59844400 | -4.47341300 | - |
| 2.11840200 |             |             |   |
| H          | -6.58124900 | -6.15465800 | - |
| 0.28376700 |             |             |   |
| C          | 3.16841000  | -3.34936200 | - |
| 0.76854200 |             |             |   |
| C          | 3.31421800  | -4.11230400 |   |
| 0.40165800 |             |             |   |
| C          | 4.02823500  | -3.59511600 | - |
| 1.84883100 |             |             |   |
| C          | 4.29901700  | -5.09715000 |   |
| 0.48720300 |             |             |   |
| H          | 2.65635900  | -3.91089200 |   |
| 1.24246200 |             |             |   |
| C          | 5.01289300  | -4.58107500 | - |
| 1.76276300 |             |             |   |
| H          | 3.91590800  | -3.00961800 | - |
| 2.75713100 |             |             |   |
| C          | 5.15091100  | -5.33458500 | - |
| 0.59465600 |             |             |   |
| H          | 4.40256600  | -5.67799500 |   |
| 1.40021500 |             |             |   |
| H          | 5.66849900  | -4.76385000 | - |
| 2.61018000 |             |             |   |
| H          | 5.91698100  | -6.10263800 | - |
| 0.52841300 |             |             |   |
| C          | 3.16004400  | 3.67430400  | - |
| 0.78562700 |             |             |   |
| C          | 3.37418100  | 4.51367700  |   |
| 0.32060200 |             |             |   |
| C          | 3.96634400  | 3.84743900  | - |
| 1.92205600 |             |             |   |
| C          | 4.36629600  | 5.49447100  |   |
| 0.29346300 |             |             |   |
| H          | 2.75201900  | 4.39013400  |   |

|                         |             |             |   |
|-------------------------|-------------|-------------|---|
| 1.20304600              |             |             |   |
| C                       | 4.95861300  | 4.82802700  | - |
| 1.95071000              |             |             |   |
| H                       | 3.80461800  | 3.20648600  | - |
| 2.78393400              |             |             |   |
| C                       | 5.16284500  | 5.65424100  | - |
| 0.84286200              |             |             |   |
| H                       | 4.51879100  | 6.13151000  |   |
| 1.16081400              |             |             |   |
| H                       | 5.56912300  | 4.95019800  | - |
| 2.84152000              |             |             |   |
| H                       | 5.93557300  | 6.41790800  | - |
| 0.86566800              |             |             |   |
| C                       | 1.56266400  | -0.47814500 |   |
| 2.41540000              |             |             |   |
| C                       | 3.50274300  | 0.89753200  |   |
| 2.53265200              |             |             |   |
| C                       | 4.21426700  | -0.23729600 |   |
| 2.93462600              |             |             |   |
| C                       | 3.52477500  | -1.44231100 |   |
| 3.05409900              |             |             |   |
| H                       | 4.00152300  | 1.85349400  |   |
| 2.40340500              |             |             |   |
| H                       | 5.27922000  | -0.19291300 |   |
| 3.13720300              |             |             |   |
| H                       | 4.04043900  | -2.35169400 |   |
| 3.35415600              |             |             |   |
| N                       | 0.18202000  | -0.58645800 |   |
| 2.07886600              |             |             |   |
| N                       | -0.94760400 | -2.63496400 |   |
| 2.50600500              |             |             |   |
| N                       | -0.34907800 | -1.68999500 |   |
| 2.33288200              |             |             |   |
| C                       | 2.14195700  | 0.78725500  |   |
| 2.27542200              |             |             |   |
| H                       | 1.54363700  | 1.62471300  |   |
| 1.93525900              |             |             |   |
| N                       | 2.21550800  | -1.57448100 |   |
| 2.79735300              |             |             |   |
| <b><sup>2</sup>INT2</b> |             |             |   |
| Mn                      | 0.32875400  | -0.13284300 | - |
| 0.43141100              |             |             |   |
| N                       | 0.40140200  | -2.13224600 | - |

|            |             |             |   |  |
|------------|-------------|-------------|---|--|
| 0.73637500 |             |             |   |  |
| C          | -2.16542100 | 2.25247900  | - |  |
| 0.36467000 |             |             |   |  |
| C          | -2.00788700 | -2.56349600 | - |  |
| 1.00548900 |             |             |   |  |
| C          | -3.89157500 | -0.90792800 | - |  |
| 0.73679100 |             |             |   |  |
| C          | -3.91615100 | 0.44909800  | - |  |
| 0.55700100 |             |             |   |  |
| C          | -2.48382200 | -1.27229500 | - |  |
| 0.80717300 |             |             |   |  |
| C          | -2.55101800 | 0.91150000  | - |  |
| 0.51518600 |             |             |   |  |
| H          | -2.74193000 | -3.34105400 | - |  |
| 1.18596600 |             |             |   |  |
| H          | -4.79280900 | 1.06747400  | - |  |
| 0.42930600 |             |             |   |  |
| N          | 2.36279700  | -0.06998800 | - |  |
| 0.49057400 |             |             |   |  |
| N          | -1.69306300 | -0.15760000 | - |  |
| 0.64927800 |             |             |   |  |
| N          | 0.28983300  | 1.90580600  | - |  |
| 0.47903400 |             |             |   |  |
| C          | 2.83080900  | -2.50942500 | - |  |
| 0.51948600 |             |             |   |  |
| C          | 2.72091700  | 2.38182100  | - |  |
| 0.55071800 |             |             |   |  |
| C          | 0.91144000  | 4.13279000  | - |  |
| 0.43547800 |             |             |   |  |
| C          | -0.24310800 | -4.33328500 | - |  |
| 1.01947100 |             |             |   |  |
| C          | 4.55754100  | 0.65494600  | - |  |
| 0.57498800 |             |             |   |  |
| C          | -0.44660900 | 4.09209000  | - |  |
| 0.35624400 |             |             |   |  |
| C          | 1.10523000  | -4.33275200 | - |  |
| 0.82706500 |             |             |   |  |
| C          | 4.58392500  | -0.70474000 | - |  |
| 0.52365400 |             |             |   |  |
| C          | 1.36938300  | 2.76443600  | - |  |
| 0.51323700 |             |             |   |  |
| C          | -0.67591800 | -2.96020300 | - |  |
| 0.94818500 |             |             |   |  |
| C          | 3.16817400  | 1.05001500  | - |  |

|            |             |             |   |
|------------|-------------|-------------|---|
| 0.53929800 |             |             |   |
| C          | -0.83268900 | 2.69906800  | - |
| 0.38316400 |             |             |   |
| C          | 1.50828900  | -2.94938600 | - |
| 0.67526700 |             |             |   |
| C          | 3.21097200  | -1.15548900 | - |
| 0.48023100 |             |             |   |
| H          | -1.13086900 | 4.92601500  | - |
| 0.29830800 |             |             |   |
| H          | 1.77202100  | -5.18205000 | - |
| 0.79481900 |             |             |   |
| H          | 5.44923600  | -1.35102600 | - |
| 0.54880300 |             |             |   |
| H          | 1.54866700  | 5.00490300  | - |
| 0.44207500 |             |             |   |
| H          | -0.89865600 | -5.18120100 | - |
| 1.17466600 |             |             |   |
| H          | 5.39639500  | 1.33140500  | - |
| 0.64846000 |             |             |   |
| C          | -0.55684700 | -0.61149400 |   |
| 4.02836800 |             |             |   |
| C          | -0.47497200 | -0.80862100 |   |
| 2.64067900 |             |             |   |
| C          | 1.09260000  | 0.86151900  |   |
| 2.42086200 |             |             |   |
| C          | 1.08502200  | 1.12620800  |   |
| 3.78640600 |             |             |   |
| C          | 0.23538200  | 0.37494300  |   |
| 4.60181600 |             |             |   |
| H          | -1.22149600 | -1.22196200 |   |
| 4.63138600 |             |             |   |
| H          | 1.72538000  | 1.41726900  |   |
| 1.74107100 |             |             |   |
| H          | 1.72435800  | 1.90192300  |   |
| 4.19353300 |             |             |   |
| H          | 0.19260300  | 0.55054400  |   |
| 5.67297800 |             |             |   |
| N          | -1.20129300 | -1.79190200 |   |
| 1.95164200 |             |             |   |
| N          | 0.32478700  | -0.07949200 |   |
| 1.84807500 |             |             |   |
| N          | -2.88083700 | -3.13280500 |   |
| 2.94587800 |             |             |   |
| N          | -2.06006600 | -2.44794500 |   |

|            |             |            |   |
|------------|-------------|------------|---|
| 2.54924900 |             |            |   |
| C          | -3.24165300 | 3.27939700 | - |
| 0.21695900 |             |            |   |
| C          | -3.38210100 | 3.99613500 |   |
| 0.98156800 |             |            |   |
| C          | -4.13009500 | 3.55101200 | - |
| 1.26907200 |             |            |   |
| C          | -4.38463800 | 4.95610600 |   |
| 1.12618700 |             |            |   |
| H          | -2.69649700 | 3.79233300 |   |
| 1.79952100 |             |            |   |
| C          | -5.13428800 | 4.50936800 | - |
| 1.12537600 |             |            |   |
| H          | -4.02372900 | 3.00425200 | - |
| 2.20175700 |             |            |   |
| C          | -5.26494300 | 5.21500000 |   |
| 0.07304900 |             |            |   |
| H          | -4.48056600 | 5.49886900 |   |
| 2.06302400 |             |            |   |
| H          | -5.81109200 | 4.70881400 | - |
| 1.95212800 |             |            |   |
| H          | -6.04638300 | 5.96185900 |   |
| 0.18500400 |             |            |   |
| C          | 3.75020700  | 3.46613600 | - |
| 0.58385900 |             |            |   |
| C          | 3.86863200  | 4.30486400 | - |
| 1.70283600 |             |            |   |
| C          | 4.61523900  | 3.67075200 |   |
| 0.50215000 |             |            |   |
| C          | 4.82506100  | 5.32066400 | - |
| 1.73476600 |             |            |   |
| H          | 3.20352900  | 4.15166900 | - |
| 2.54799600 |             |            |   |
| C          | 5.57338300  | 4.68486100 |   |
| 0.47131400 |             |            |   |
| H          | 4.53119500  | 3.02430700 |   |
| 1.37157200 |             |            |   |
| C          | 5.68070200  | 5.51388200 | - |
| 0.64770700 |             |            |   |
| H          | 4.90461600  | 5.95818300 | - |
| 2.61138700 |             |            |   |
| H          | 6.23319700  | 4.82974700 |   |
| 1.32283800 |             |            |   |
| H          | 6.42610400  | 6.30425500 | - |

|            |             |             |   |
|------------|-------------|-------------|---|
| 0.67269200 |             |             |   |
| C          | 3.91597500  | -3.53472800 | - |
| 0.44712500 |             |             |   |
| C          | 4.66861100  | -3.68915900 |   |
| 0.72754100 |             |             |   |
| C          | 4.21457900  | -4.35309400 | - |
| 1.54774000 |             |             |   |
| C          | 5.68808400  | -4.63914100 |   |
| 0.80261700 |             |             |   |
| H          | 4.44555000  | -3.05613800 |   |
| 1.58197800 |             |             |   |
| C          | 5.23297800  | -5.30443400 | - |
| 1.47364400 |             |             |   |
| H          | 3.64310200  | -4.23269200 | - |
| 2.46369300 |             |             |   |
| C          | 5.97271900  | -5.45096100 | - |
| 0.29785800 |             |             |   |
| H          | 6.25792600  | -4.74718300 |   |
| 1.72189500 |             |             |   |
| H          | 5.45266300  | -5.92667100 | - |
| 2.33729200 |             |             |   |
| H          | 6.76648500  | -6.19099200 | - |
| 0.24034400 |             |             |   |
| C          | -5.05781200 | -1.80132100 | - |
| 0.81730600 |             |             |   |
| C          | -5.12644100 | -2.99885500 | - |
| 0.08218900 |             |             |   |
| C          | -6.16177100 | -1.44299800 | - |
| 1.61154300 |             |             |   |
| C          | -6.25548400 | -3.81495900 | - |
| 0.15112300 |             |             |   |
| H          | -4.30306600 | -3.27288400 |   |
| 0.57012000 |             |             |   |
| C          | -7.29130700 | -2.25714700 | - |
| 1.67654300 |             |             |   |
| H          | -6.11560400 | -0.52407300 | - |
| 2.18957000 |             |             |   |
| C          | -7.34131400 | -3.44963700 | - |
| 0.94979200 |             |             |   |
| H          | -6.29034100 | -4.73255400 |   |
| 0.43041900 |             |             |   |
| H          | -8.13137500 | -1.96397700 | - |
| 2.30092400 |             |             |   |
| H          | -8.22033700 | -4.08635500 | - |

1.00290500

**4INT2**

|            |             |             |   |
|------------|-------------|-------------|---|
| Mn         | 0.45992000  | -0.00996300 | - |
| 0.44026500 |             |             |   |
| N          | -1.54915700 | -0.26161200 | - |
| 0.66189300 |             |             |   |
| C          | 2.53345600  | 2.70500400  | - |
| 0.06071700 |             |             |   |
| C          | -2.28678400 | 2.09771600  | - |
| 0.62611800 |             |             |   |
| C          | -0.79712700 | 4.07735500  | - |
| 0.19681900 |             |             |   |
| C          | 0.53970200  | 4.24445300  | - |
| 0.00648100 |             |             |   |
| C          | -1.01814600 | 2.66918800  | - |
| 0.43623700 |             |             |   |
| C          | 1.15249900  | 2.94304100  | - |
| 0.14895000 |             |             |   |
| H          | 1.06609300  | 5.16019700  |   |
| 0.21899300 |             |             |   |
| H          | -1.57099900 | 4.82984900  | - |
| 0.15489200 |             |             |   |
| N          | 0.76227900  | -2.00559300 | - |
| 0.74203800 |             |             |   |
| N          | 0.18265100  | 1.99455800  | - |
| 0.39122600 |             |             |   |
| N          | 2.47259000  | 0.24318700  | - |
| 0.36323900 |             |             |   |
| C          | -1.59577900 | -2.71476400 | - |
| 0.73970200 |             |             |   |
| C          | 3.23086200  | -2.09977700 | - |
| 0.69509600 |             |             |   |
| C          | 4.75448100  | -0.10543500 | - |
| 0.46905500 |             |             |   |
| C          | -3.82213600 | 0.10442800  | - |
| 0.77224600 |             |             |   |
| C          | 1.70745500  | -4.11154000 | - |
| 0.84946400 |             |             |   |
| C          | 4.55986000  | 1.22786300  | - |
| 0.27275100 |             |             |   |
| C          | -3.64834900 | -1.25322800 | - |
| 0.70516600 |             |             |   |
| C          | 0.35416300  | -4.27570200 | - |

|            |             |             |   |
|------------|-------------|-------------|---|
| 0.85433100 |             |             |   |
| C          | 3.44929800  | -0.72221600 | - |
| 0.51367200 |             |             |   |
| C          | -2.51883700 | 0.71478900  | - |
| 0.70700500 |             |             |   |
| C          | 1.95746000  | -2.68753600 | - |
| 0.78090400 |             |             |   |
| C          | 3.13336600  | 1.44239300  | - |
| 0.20769400 |             |             |   |
| C          | -2.20927700 | -1.46751700 | - |
| 0.67785600 |             |             |   |
| C          | -0.22667400 | -2.95955600 | - |
| 0.78485800 |             |             |   |
| H          | -2.24466400 | -3.58200400 | - |
| 0.78939200 |             |             |   |
| H          | 5.30959200  | 2.00250100  | - |
| 0.20463700 |             |             |   |
| H          | -0.20922100 | -5.19969800 | - |
| 0.89449700 |             |             |   |
| H          | 5.69345100  | -0.62500100 | - |
| 0.59207400 |             |             |   |
| H          | -4.76337200 | 0.63331200  | - |
| 0.80171800 |             |             |   |
| H          | 2.47001600  | -4.87622000 | - |
| 0.87885100 |             |             |   |
| C          | -1.40080900 | -1.93442200 |   |
| 3.28062800 |             |             |   |
| C          | -0.98890000 | -0.80269400 |   |
| 2.55829200 |             |             |   |
| C          | 1.12393400  | -1.64966100 |   |
| 2.27454700 |             |             |   |
| C          | 0.82358900  | -2.80537400 |   |
| 2.98940000 |             |             |   |
| C          | -0.47381200 | -2.94986400 |   |
| 3.48734500 |             |             |   |
| H          | -2.41221900 | -2.00846400 |   |
| 3.66815000 |             |             |   |
| H          | 2.10116000  | -1.49954500 |   |
| 1.82770400 |             |             |   |
| H          | 1.57629400  | -3.57306100 |   |
| 3.13142100 |             |             |   |
| H          | -0.76128100 | -3.84164100 |   |
| 4.03727900 |             |             |   |
| N          | -1.82064800 | 0.31376600  |   |



|            |             |             |   |
|------------|-------------|-------------|---|
| 2.31985400 |             |             |   |
| N          | 0.23722400  | -0.67037200 |   |
| 2.04246900 |             |             |   |
| N          | -4.14539600 | 0.28177000  |   |
| 2.78196800 |             |             |   |
| N          | -3.02385400 | 0.21883600  |   |
| 2.58757600 |             |             |   |
| C          | 3.43475200  | 3.87417700  |   |
| 0.17481300 |             |             |   |
| C          | 4.17998200  | 3.97070900  |   |
| 1.36038600 |             |             |   |
| C          | 3.56164300  | 4.89228500  | - |
| 0.78312300 |             |             |   |
| C          | 5.02688100  | 5.05701300  |   |
| 1.58402800 |             |             |   |
| H          | 4.08615200  | 3.18629100  |   |
| 2.10612500 |             |             |   |
| C          | 4.40808300  | 5.97920100  | - |
| 0.56050800 |             |             |   |
| H          | 2.99219200  | 4.82142600  | - |
| 1.70552500 |             |             |   |
| C          | 5.14325200  | 6.06508900  |   |
| 0.62412900 |             |             |   |
| H          | 5.59260900  | 5.11771500  |   |
| 2.51009100 |             |             |   |
| H          | 4.49702300  | 6.75624300  | - |
| 1.31521000 |             |             |   |
| H          | 5.80264900  | 6.91129700  |   |
| 0.79768200 |             |             |   |
| C          | -3.45878600 | 3.02155900  | - |
| 0.72003200 |             |             |   |
| C          | -3.58423700 | 3.89324400  | - |
| 1.81334600 |             |             |   |
| C          | -4.44799000 | 3.04857000  |   |
| 0.27549800 |             |             |   |
| C          | -4.66998000 | 4.76433200  | - |
| 1.91142400 |             |             |   |
| H          | -2.82149500 | 3.87986300  | - |
| 2.58685700 |             |             |   |
| C          | -5.53516800 | 3.91802900  |   |
| 0.17771200 |             |             |   |
| H          | -4.36169900 | 2.38330800  |   |
| 1.12894500 |             |             |   |
| C          | -5.64986500 | 4.77884700  | - |

|            |             |             |   |  |
|------------|-------------|-------------|---|--|
| 0.91613300 |             |             |   |  |
| H          | -4.75175100 | 5.42907400  | - |  |
| 2.76742700 |             |             |   |  |
| H          | -6.28954700 | 3.92531000  |   |  |
| 0.96002900 |             |             |   |  |
| H          | -6.49602200 | 5.45653000  | - |  |
| 0.99191000 |             |             |   |  |
| C          | 4.42133900  | -2.99830200 | - |  |
| 0.77925900 |             |             |   |  |
| C          | 5.28911400  | -3.14686400 |   |  |
| 0.31448200 |             |             |   |  |
| C          | 4.69187400  | -3.72113100 | - |  |
| 1.95200200 |             |             |   |  |
| C          | 6.39657900  | -3.99226900 |   |  |
| 0.23846100 |             |             |   |  |
| H          | 5.08720200  | -2.59154300 |   |  |
| 1.22638500 |             |             |   |  |
| C          | 5.79827600  | -4.56804900 | - |  |
| 2.02904700 |             |             |   |  |
| H          | 4.02709000  | -3.60961500 | - |  |
| 2.80386400 |             |             |   |  |
| C          | 6.65445000  | -4.70636400 | - |  |
| 0.93404700 |             |             |   |  |
| H          | 7.05540300  | -4.09628500 |   |  |
| 1.09665200 |             |             |   |  |
| H          | 5.99424400  | -5.11580600 | - |  |
| 2.94707100 |             |             |   |  |
| H          | 7.51661500  | -5.36510700 | - |  |
| 0.99421300 |             |             |   |  |
| C          | -4.70466400 | -2.27340500 | - |  |
| 0.64394900 |             |             |   |  |
| C          | -5.82783700 | -2.18605100 | - |  |
| 1.48498100 |             |             |   |  |
| C          | -4.64590200 | -3.32798700 |   |  |
| 0.28566000 |             |             |   |  |
| C          | -6.85342200 | -3.12668800 | - |  |
| 1.40625300 |             |             |   |  |
| H          | -5.87916300 | -1.37974000 | - |  |
| 2.21142800 |             |             |   |  |
| C          | -5.67054100 | -4.27114300 |   |  |
| 0.36041500 |             |             |   |  |
| H          | -3.80146500 | -3.38682700 |   |  |
| 0.96686300 |             |             |   |  |
| C          | -6.77742200 | -4.17569700 | - |  |

|                         |             |             |   |
|-------------------------|-------------|-------------|---|
| 0.48601300              |             |             |   |
| H                       | -7.71109000 | -3.04481700 | - |
| 2.06882700              |             |             |   |
| H                       | -5.60921600 | -5.07612600 |   |
| 1.08830500              |             |             |   |
| H                       | -7.57585300 | -4.91043300 | - |
| 0.42724100              |             |             |   |
| <b><sup>6</sup>INT2</b> |             |             |   |
| Mn                      | 0.16783600  | 0.18327300  | - |
| 0.14306700              |             |             |   |
| N                       | 1.41242100  | 1.88583900  | - |
| 0.27081300              |             |             |   |
| C                       | -3.25017900 | -0.30062300 | - |
| 0.79723700              |             |             |   |
| C                       | -0.35663300 | 3.62837700  | - |
| 0.24211600              |             |             |   |
| C                       | -2.87255400 | 3.25815300  | - |
| 0.20797100              |             |             |   |
| C                       | -3.67463400 | 2.16904500  | - |
| 0.37996700              |             |             |   |
| C                       | -1.50142400 | 2.80110200  | - |
| 0.33016900              |             |             |   |
| C                       | -2.80534500 | 1.02931800  | - |
| 0.60196700              |             |             |   |
| H                       | -4.75405400 | 2.13683300  | - |
| 0.34298200              |             |             |   |
| H                       | -3.18014500 | 4.27373000  | - |
| 0.00488600              |             |             |   |
| N                       | 1.86443600  | -1.01010900 | - |
| 0.65830900              |             |             |   |
| N                       | -1.49871500 | 1.44561200  | - |
| 0.54709200              |             |             |   |
| N                       | -1.06385000 | -1.46269300 | - |
| 0.68323900              |             |             |   |
| C                       | 3.61089900  | 0.74322500  | - |
| 0.42768200              |             |             |   |
| C                       | 0.70347600  | -3.20463600 | - |
| 0.73898800              |             |             |   |
| C                       | -1.77790200 | -3.60419600 | - |
| 1.11132200              |             |             |   |
| C                       | 2.14183200  | 4.05945200  | - |
| 0.41809000              |             |             |   |
| C                       | 3.20866900  | -2.86508700 | - |

|            |             |             |   |
|------------|-------------|-------------|---|
| 0.47183900 |             |             |   |
| C          | -2.87574300 | -2.79574000 | - |
| 1.14972300 |             |             |   |
| C          | 3.24379400  | 3.25837700  | - |
| 0.47732200 |             |             |   |
| C          | 4.01749100  | -1.76791900 | - |
| 0.38871400 |             |             |   |
| C          | -0.63608300 | -2.75840000 | - |
| 0.82171900 |             |             |   |
| C          | 0.98875700  | 3.19037600  | - |
| 0.28911200 |             |             |   |
| C          | 1.85377700  | -2.38394000 | - |
| 0.65042000 |             |             |   |
| C          | -2.42284300 | -1.44669800 | - |
| 0.86629500 |             |             |   |
| C          | 2.78091700  | 1.88786500  | - |
| 0.38128900 |             |             |   |
| C          | 3.16674700  | -0.60012900 | - |
| 0.50856800 |             |             |   |
| H          | -3.89331500 | -3.08148700 | - |
| 1.37383200 |             |             |   |
| H          | 4.27180500  | 3.56449100  | - |
| 0.60741900 |             |             |   |
| H          | 5.08791300  | -1.75233800 | - |
| 0.24185800 |             |             |   |
| H          | -1.73760300 | -4.66782600 | - |
| 1.29831600 |             |             |   |
| H          | 2.10837300  | 5.13700400  | - |
| 0.49036400 |             |             |   |
| H          | 3.50365300  | -3.90246000 | - |
| 0.40548500 |             |             |   |
| C          | -0.58158000 | 5.09972400  | - |
| 0.11767600 |             |             |   |
| C          | -1.27075000 | 5.81315600  | - |
| 1.11231300 |             |             |   |
| C          | -0.09898200 | 5.80441900  | - |
| 0.99752900 |             |             |   |
| C          | -1.47443600 | 7.18827700  | - |
| 0.99386500 |             |             |   |
| H          | -1.63975800 | 5.27837400  | - |
| 1.98271900 |             |             |   |
| C          | -0.30258500 | 7.17944800  | - |
| 1.11734700 |             |             |   |
| H          | 0.43488300  | 5.26072000  | - |

|            |             |             |   |
|------------|-------------|-------------|---|
| 1.77175200 |             |             |   |
| C          | -0.99163800 | 7.87629100  |   |
| 0.12192900 |             |             |   |
| H          | -2.00504100 | 7.72345000  | - |
| 1.77706400 |             |             |   |
| H          | 0.07366700  | 7.70575700  |   |
| 1.99076500 |             |             |   |
| H          | -1.15007600 | 8.94746600  |   |
| 0.21430200 |             |             |   |
| C          | -4.72181200 | -0.50906000 | - |
| 0.95258100 |             |             |   |
| C          | -5.44052400 | -1.31512700 | - |
| 0.05462900 |             |             |   |
| C          | -5.42150200 | 0.10075300  | - |
| 2.00733600 |             |             |   |
| C          | -6.81472800 | -1.50405600 | - |
| 0.20350400 |             |             |   |
| H          | -4.91380700 | -1.78702200 |   |
| 0.76871500 |             |             |   |
| C          | -6.79554900 | -0.08752400 | - |
| 2.15801700 |             |             |   |
| H          | -4.87404800 | 0.72139100  | - |
| 2.71074900 |             |             |   |
| C          | -7.49759100 | -0.89069400 | - |
| 1.25610900 |             |             |   |
| H          | -7.35264100 | -2.12553200 |   |
| 0.50763000 |             |             |   |
| H          | -7.31685900 | 0.38943700  | - |
| 2.98388600 |             |             |   |
| H          | -8.56812400 | -1.03696200 | - |
| 1.37248800 |             |             |   |
| C          | 0.91831700  | -4.68275900 | - |
| 0.72971200 |             |             |   |
| C          | 0.39414700  | -5.46429700 |   |
| 0.31319000 |             |             |   |
| C          | 1.64341000  | -5.32267200 | - |
| 1.74735400 |             |             |   |
| C          | 0.59005800  | -6.84541400 |   |
| 0.33890700 |             |             |   |
| H          | -0.16432500 | -4.97343900 |   |
| 1.10558900 |             |             |   |
| C          | 1.83990500  | -6.70402400 | - |
| 1.72279100 |             |             |   |
| H          | 2.04688200  | -4.72594400 | - |

|            |             |             |   |
|------------|-------------|-------------|---|
| 2.56038200 |             |             |   |
| C          | 1.31412200  | -7.47005900 | - |
| 0.67953800 |             |             |   |
| H          | 0.17999400  | -7.43385700 |   |
| 1.15580200 |             |             |   |
| H          | 2.39876300  | -7.18292700 | - |
| 2.52255800 |             |             |   |
| H          | 1.46645400  | -8.54591500 | - |
| 0.66118000 |             |             |   |
| C          | 5.08610300  | 0.97046300  | - |
| 0.39193500 |             |             |   |
| C          | 5.68516000  | 1.63325100  |   |
| 0.69238200 |             |             |   |
| C          | 5.90895900  | 0.52751600  | - |
| 1.44110100 |             |             |   |
| C          | 7.06359200  | 1.84548900  |   |
| 0.72798400 |             |             |   |
| H          | 5.05748400  | 1.97815000  |   |
| 1.50917500 |             |             |   |
| C          | 7.28742200  | 0.73941100  | - |
| 1.40670900 |             |             |   |
| H          | 5.45430200  | 0.02068400  | - |
| 2.28738800 |             |             |   |
| C          | 7.86991200  | 1.39883800  | - |
| 0.32161800 |             |             |   |
| H          | 7.50830400  | 2.35610000  |   |
| 1.57824000 |             |             |   |
| H          | 7.90588900  | 0.39488800  | - |
| 2.23141300 |             |             |   |
| H          | 8.94363700  | 1.56440700  | - |
| 0.29482300 |             |             |   |
| C          | -1.18262900 | -1.91830200 |   |
| 3.62555900 |             |             |   |
| C          | -0.94766400 | -0.89290400 |   |
| 2.69896300 |             |             |   |
| C          | 1.24054400  | -1.54509000 |   |
| 2.40559200 |             |             |   |
| C          | 1.10872700  | -2.58883900 |   |
| 3.31747300 |             |             |   |
| C          | -0.13298800 | -2.78015200 |   |
| 3.92714600 |             |             |   |
| H          | -2.15631200 | -2.03131300 |   |
| 4.09143500 |             |             |   |
| H          | 2.17468600  | -1.36551900 |   |

|            |             |             |  |
|------------|-------------|-------------|--|
| 1.88558500 |             |             |  |
| H          | 1.95178200  | -3.23764500 |  |
| 3.52702800 |             |             |  |
| H          | -0.28403200 | -3.58901300 |  |
| 4.63636900 |             |             |  |
| N          | -1.90801100 | 0.06168800  |  |
| 2.31260200 |             |             |  |
| N          | 0.23281500  | -0.71700000 |  |
| 2.08796800 |             |             |  |
| N          | -4.19564600 | -0.13967800 |  |
| 2.90287000 |             |             |  |
| N          | -3.08414500 | -0.10929000 |  |
| 2.65942000 |             |             |  |

**<sup>2</sup>TS2**

|            |             |             |   |
|------------|-------------|-------------|---|
| Mn         | 0.28837100  | 0.17816000  | - |
| 0.83129100 |             |             |   |
| N          | -1.30129100 | 1.41703500  | - |
| 1.02719200 |             |             |   |
| C          | 3.72365100  | 0.63659800  | - |
| 0.67376500 |             |             |   |
| C          | -0.15917300 | 3.60260600  | - |
| 0.78265000 |             |             |   |
| C          | 2.32035000  | 3.95435400  | - |
| 0.55742400 |             |             |   |
| C          | 3.40449600  | 3.12991100  | - |
| 0.55699400 |             |             |   |
| C          | 1.15361300  | 3.11685000  | - |
| 0.70066900 |             |             |   |
| C          | 2.90811100  | 1.77897100  | - |
| 0.67081900 |             |             |   |
| H          | 4.44637600  | 3.40698200  | - |
| 0.48945400 |             |             |   |
| H          | 2.30778100  | 5.03191900  | - |
| 0.48227100 |             |             |   |
| N          | -0.90704800 | -1.41756100 | - |
| 1.19277300 |             |             |   |
| N          | 1.53003700  | 1.79057100  | - |
| 0.75575400 |             |             |   |
| N          | 1.92367900  | -1.04576000 | - |
| 0.92036400 |             |             |   |
| C          | -3.09622100 | -0.26412800 | - |
| 1.31236900 |             |             |   |
| C          | 0.77211200  | -3.23234600 | - |

|            |             |             |   |  |
|------------|-------------|-------------|---|--|
| 1.07023100 |             |             |   |  |
| C          | 3.25963100  | -2.93138900 | - |  |
| 0.85176100 |             |             |   |  |
| C          | -2.63005200 | 3.30532200  | - |  |
| 1.13047800 |             |             |   |  |
| C          | -1.70456800 | -3.58382800 | - |  |
| 1.32680000 |             |             |   |  |
| C          | 4.08312900  | -1.85355700 | - |  |
| 0.74624700 |             |             |   |  |
| C          | -3.45123500 | 2.22840700  | - |  |
| 1.27543700 |             |             |   |  |
| C          | -2.78163700 | -2.75597900 | - |  |
| 1.38986900 |             |             |   |  |
| C          | 1.91106300  | -2.42206100 | - |  |
| 0.95234800 |             |             |   |  |
| C          | -1.28994400 | 2.79397000  | - |  |
| 0.96328800 |             |             |   |  |
| C          | -0.53472600 | -2.74384100 | - |  |
| 1.20836100 |             |             |   |  |
| C          | 3.24482000  | -0.67664200 | - |  |
| 0.79380500 |             |             |   |  |
| C          | -2.61586500 | 1.05083500  | - |  |
| 1.21861600 |             |             |   |  |
| C          | -2.28088500 | -1.40411200 | - |  |
| 1.29283500 |             |             |   |  |
| H          | 5.15849700  | -1.84932900 | - |  |
| 0.64526000 |             |             |   |  |
| H          | -4.52250500 | 2.22681000  | - |  |
| 1.41362600 |             |             |   |  |
| H          | -3.82192500 | -3.02952700 | - |  |
| 1.48604100 |             |             |   |  |
| H          | 3.53241900  | -3.97654400 | - |  |
| 0.86494300 |             |             |   |  |
| H          | -2.90028800 | 4.35145500  | - |  |
| 1.13678800 |             |             |   |  |
| H          | -1.69762900 | -4.66342600 | - |  |
| 1.34897600 |             |             |   |  |
| C          | -4.57567800 | -0.46160300 | - |  |
| 1.41290800 |             |             |   |  |
| C          | -5.28699300 | -1.01800500 | - |  |
| 0.33810800 |             |             |   |  |
| C          | -5.27944100 | -0.09063000 | - |  |
| 2.56839800 |             |             |   |  |
| C          | -6.66967600 | -1.19269900 | - |  |



|            |             |             |   |
|------------|-------------|-------------|---|
| 0.41624600 |             |             |   |
| H          | -4.74498400 | -1.31444900 |   |
| 0.55514300 |             |             |   |
| C          | -6.66215500 | -0.26509100 | - |
| 2.64593500 |             |             |   |
| H          | -4.73305300 | 0.33542200  | - |
| 3.40530800 |             |             |   |
| C          | -7.36178700 | -0.81563300 | - |
| 1.56930500 |             |             |   |
| H          | -7.20617700 | -1.62165000 |   |
| 0.42626000 |             |             |   |
| H          | -7.19208800 | 0.02503600  | - |
| 3.54946000 |             |             |   |
| H          | -8.43834600 | -0.95133800 | - |
| 1.62991000 |             |             |   |
| C          | -0.36891300 | 5.08078900  | - |
| 0.68820300 |             |             |   |
| C          | 0.03050900  | 5.93479700  | - |
| 1.72694200 |             |             |   |
| C          | -0.97702100 | 5.63943200  |   |
| 0.44594300 |             |             |   |
| C          | -0.17304600 | 7.31263800  | - |
| 1.63366600 |             |             |   |
| H          | 0.50009600  | 5.50817200  | - |
| 2.60889200 |             |             |   |
| C          | -1.18264500 | 7.01648700  |   |
| 0.54040800 |             |             |   |
| H          | -1.28088700 | 4.98120900  |   |
| 1.25406200 |             |             |   |
| C          | -0.78093400 | 7.85747300  | - |
| 0.50007400 |             |             |   |
| H          | 0.13912000  | 7.95991800  | - |
| 2.44904700 |             |             |   |
| H          | -1.65318300 | 7.43251100  |   |
| 1.42756200 |             |             |   |
| H          | -0.94054400 | 8.93000200  | - |
| 0.42819900 |             |             |   |
| C          | 5.19705600  | 0.82970100  | - |
| 0.50806600 |             |             |   |
| C          | 6.08579100  | 0.53710900  | - |
| 1.55361700 |             |             |   |
| C          | 5.72105900  | 1.30176900  |   |
| 0.70547100 |             |             |   |
| C          | 7.46110100  | 0.70974500  | - |

|            |             |             |   |
|------------|-------------|-------------|---|
| 1.38963900 |             |             |   |
| H          | 5.68755000  | 0.17265900  | - |
| 2.49635700 |             |             |   |
| C          | 7.09549600  | 1.47679200  |   |
| 0.87088700 |             |             |   |
| H          | 5.03784500  | 1.53423700  |   |
| 1.51792600 |             |             |   |
| C          | 7.97032300  | 1.18003200  | - |
| 0.17693000 |             |             |   |
| H          | 8.13445400  | 0.48113500  | - |
| 2.21156100 |             |             |   |
| H          | 7.48322900  | 1.84140300  |   |
| 1.81862400 |             |             |   |
| H          | 9.04103000  | 1.31525100  | - |
| 0.04959800 |             |             |   |
| C          | 0.96338900  | -4.71411000 | - |
| 1.01019600 |             |             |   |
| C          | 1.34823800  | -5.32360200 |   |
| 0.19387100 |             |             |   |
| C          | 0.75800100  | -5.52134500 | - |
| 2.13848900 |             |             |   |
| C          | 1.52136000  | -6.70599700 |   |
| 0.26921900 |             |             |   |
| H          | 1.51057000  | -4.69962400 |   |
| 1.06840300 |             |             |   |
| C          | 0.92965000  | -6.90468800 | - |
| 2.06413500 |             |             |   |
| H          | 0.46227200  | -5.05466000 | - |
| 3.07393800 |             |             |   |
| C          | 1.31132900  | -7.50103300 | - |
| 0.86007200 |             |             |   |
| H          | 1.81564400  | -7.16293600 |   |
| 1.21056500 |             |             |   |
| H          | 0.76884500  | -7.51597700 | - |
| 2.94829100 |             |             |   |
| H          | 1.44455100  | -8.57801000 | - |
| 0.80226900 |             |             |   |
| N          | -1.07398900 | -1.97222200 |   |
| 1.79630600 |             |             |   |
| N          | -1.41787000 | -3.18733500 |   |
| 1.92404500 |             |             |   |
| N          | -2.39138300 | -3.77461000 |   |
| 2.21658300 |             |             |   |
| C          | 0.22447900  | -1.56614300 |   |

|            |             |             |  |
|------------|-------------|-------------|--|
| 2.09671700 |             |             |  |
| C          | 1.12124300  | -2.33578100 |  |
| 2.86286200 |             |             |  |
| C          | 1.67339200  | 0.21962300  |  |
| 2.07517200 |             |             |  |
| C          | 2.34025700  | -1.77365000 |  |
| 3.21655000 |             |             |  |
| H          | 0.84721300  | -3.34047600 |  |
| 3.16788300 |             |             |  |
| C          | 2.61733100  | -0.45512700 |  |
| 2.84249500 |             |             |  |
| H          | 1.85300900  | 1.22940500  |  |
| 1.72398700 |             |             |  |
| H          | 3.05880600  | -2.34995400 |  |
| 3.79278500 |             |             |  |
| H          | 3.55020000  | 0.02769000  |  |
| 3.11347000 |             |             |  |
| N          | 0.51642500  | -0.32487100 |  |
| 1.66881600 |             |             |  |
| C          | -3.01622300 | -1.15782100 |  |
| 2.86676800 |             |             |  |
| C          | -3.59993200 | -2.25339700 |  |
| 2.88965000 |             |             |  |
| C          | -2.57165300 | 0.19559600  |  |
| 2.99806300 |             |             |  |
| C          | -3.06159200 | 1.19769800  |  |
| 2.14290300 |             |             |  |
| C          | -1.63575500 | 0.53372500  |  |
| 3.99478100 |             |             |  |
| C          | -2.62321700 | 2.51157600  |  |
| 2.28770800 |             |             |  |
| H          | -3.76999200 | 0.94000800  |  |
| 1.36401700 |             |             |  |
| C          | -1.20375100 | 1.84897000  |  |
| 4.13189600 |             |             |  |
| H          | -1.24654100 | -0.24534100 |  |
| 4.64318800 |             |             |  |
| C          | -1.69515700 | 2.84103700  |  |
| 3.27824000 |             |             |  |
| H          | -3.00065500 | 3.27050200  |  |
| 1.61089400 |             |             |  |
| H          | -0.47902000 | 2.09994800  |  |
| 4.90151800 |             |             |  |
| H          | -1.35301500 | 3.86692600  |  |

|                        |             |             |             |
|------------------------|-------------|-------------|-------------|
| 3.38656100             |             |             |             |
| H                      |             | -4.44449200 | -2.85751200 |
| 3.14848500             |             |             |             |
| <b><sup>4</sup>TS2</b> |             |             |             |
| Mn                     | 0.30467100  | 0.04680600  | -           |
| 0.86986000             |             |             |             |
| N                      | -1.11705400 | 1.47899100  | -           |
| 1.09657400             |             |             |             |
| C                      | 0.33279900  | -3.40690300 | -           |
| 0.93112600             |             |             |             |
| C                      | -3.10965400 | 0.02896400  | -           |
| 1.35486600             |             |             |             |
| C                      | -3.12351900 | -2.48245800 | -           |
| 1.35614700             |             |             |             |
| C                      | -2.16477400 | -3.44063400 | -           |
| 1.23917200             |             |             |             |
| C                      | -2.45022100 | -1.20580600 | -           |
| 1.30530200             |             |             |             |
| C                      | -0.89863100 | -2.75571400 | -           |
| 1.10429000             |             |             |             |
| H                      | -2.29672900 | -4.51250200 | -           |
| 1.23985300             |             |             |             |
| H                      | -4.19000800 | -2.61960400 | -           |
| 1.45808400             |             |             |             |
| N                      | 1.73886600  | 1.48805200  | -           |
| 0.82347800             |             |             |             |
| N                      | -1.09340200 | -1.39450000 | -           |
| 1.16205700             |             |             |             |
| N                      | 1.76281000  | -1.38590800 | -           |
| 0.90756600             |             |             |             |
| C                      | 0.29246600  | 3.50178000  | -           |
| 0.86210200             |             |             |             |
| C                      | 3.76671200  | 0.06216000  | -           |
| 0.75434600             |             |             |             |
| C                      | 3.80358900  | -2.45424100 | -           |
| 0.72510600             |             |             |             |
| C                      | -3.15330200 | 2.54229600  | -           |
| 1.33917900             |             |             |             |
| C                      | 3.77079400  | 2.57805300  | -           |
| 0.66549000             |             |             |             |
| C                      | 2.84482500  | -3.41998400 | -           |
| 0.73412600             |             |             |             |
| C                      | -2.20846700 | 3.51230900  | -           |

|            |             |             |   |
|------------|-------------|-------------|---|
| 1.18514400 |             |             |   |
| C          | 2.80162000  | 3.53427300  | - |
| 0.67619500 |             |             |   |
| C          | 3.12179900  | -1.18302300 | - |
| 0.80952300 |             |             |   |
| C          | -2.46835900 | 1.27313900  | - |
| 1.26836300 |             |             |   |
| C          | 3.10475100  | 1.30057900  | - |
| 0.76669100 |             |             |   |
| C          | 1.57145100  | -2.74946000 | - |
| 0.86658500 |             |             |   |
| C          | -0.93492400 | 2.84345400  | - |
| 1.04577600 |             |             |   |
| C          | 1.53289000  | 2.85068000  | - |
| 0.77545600 |             |             |   |
| H          | 2.98319600  | -4.48903800 | - |
| 0.66790800 |             |             |   |
| H          | -2.35803700 | 4.58188900  | - |
| 1.16978200 |             |             |   |
| H          | 2.93086500  | 4.60580900  | - |
| 0.63395000 |             |             |   |
| H          | 4.87367800  | -2.58509000 | - |
| 0.65822700 |             |             |   |
| H          | -4.21703100 | 2.66790700  | - |
| 1.48076000 |             |             |   |
| H          | 4.83957200  | 2.72022900  | - |
| 0.60001400 |             |             |   |
| C          | 0.38376000  | -2.46710700 |   |
| 2.91045800 |             |             |   |
| C          | -0.22945900 | -1.47045700 |   |
| 2.12798200 |             |             |   |
| C          | 1.70672900  | -0.23189500 |   |
| 2.05958600 |             |             |   |
| C          | 2.39401100  | -1.14920000 |   |
| 2.84864400 |             |             |   |
| C          | 1.71856300  | -2.30437100 |   |
| 3.25554900 |             |             |   |
| H          | -0.18622100 | -3.33182500 |   |
| 3.23379000 |             |             |   |
| H          | 2.19496500  | 0.65765900  |   |
| 1.67635200 |             |             |   |
| H          | 3.42975300  | -0.97231800 |   |
| 3.11910400 |             |             |   |
| H          | 2.22286100  | -3.06222100 |   |

|            |             |             |   |
|------------|-------------|-------------|---|
| 3.84872400 |             |             |   |
| N          | -1.58904600 | -1.44510100 |   |
| 1.82732500 |             |             |   |
| N          | 0.43351300  | -0.39355900 |   |
| 1.67250500 |             |             |   |
| N          | -3.43442200 | -2.69980100 |   |
| 2.24803300 |             |             |   |
| N          | -2.31592500 | -2.47450700 |   |
| 1.97029300 |             |             |   |
| C          | -3.15069100 | -0.00712300 |   |
| 2.85994200 |             |             |   |
| C          | -4.07780800 | -0.83201800 |   |
| 2.86065400 |             |             |   |
| C          | -2.25358600 | 1.09553900  |   |
| 3.02548700 |             |             |   |
| C          | -1.32907700 | 1.09282900  |   |
| 4.08831600 |             |             |   |
| C          | -2.27985800 | 2.18414200  |   |
| 2.13779500 |             |             |   |
| C          | -0.45366500 | 2.16135300  |   |
| 4.25666800 |             |             |   |
| H          | -1.29926600 | 0.24320900  |   |
| 4.76376700 |             |             |   |
| C          | -1.40363000 | 3.25141700  |   |
| 2.31653200 |             |             |   |
| H          | -2.97271100 | 2.18375700  |   |
| 1.30482200 |             |             |   |
| C          | -0.48859200 | 3.24328400  |   |
| 3.37155700 |             |             |   |
| H          | 0.25865000  | 2.14894100  |   |
| 5.07712100 |             |             |   |
| H          | -1.42864400 | 4.08319000  |   |
| 1.62072500 |             |             |   |
| H          | 0.19437200  | 4.07814800  |   |
| 3.50564600 |             |             |   |
| H          | -5.08891100 | -1.10938400 |   |
| 3.07353300 |             |             |   |
| C          | 0.28150600  | 4.99222000  | - |
| 0.74787200 |             |             |   |
| C          | 0.64629300  | 5.61102400  |   |
| 0.45908300 |             |             |   |
| C          | -0.08863400 | 5.80368100  | - |
| 1.83142900 |             |             |   |
| C          | 0.63241600  | 7.00098700  |   |

|            |             |             |             |
|------------|-------------|-------------|-------------|
| 0.58274000 |             |             |             |
| H          |             | 0.94302500  | 4.98770600  |
| 1.29766300 |             |             |             |
| C          | -0.10400700 | 7.19385300  | -           |
| 1.70871500 |             |             |             |
| H          | -0.36272300 | 5.33411200  | -           |
| 2.77187500 |             |             |             |
| C          | 0.25471500  | 7.79714800  | -           |
| 0.50089100 |             |             |             |
| H          |             | 0.91386400  | 7.46120600  |
| 1.52633200 |             |             |             |
| H          | -0.39083700 | 7.80619900  | -           |
| 2.55958900 |             |             |             |
| H          | 0.24241500  | 8.87957300  | -           |
| 0.40591700 |             |             |             |
| C          | 5.25776000  | 0.07305400  | -           |
| 0.63340800 |             |             |             |
| C          |             | 5.88038500  | -0.36589300 |
| 0.54515300 |             |             |             |
| C          | 6.06233000  | 0.52808800  | -           |
| 1.68870800 |             |             |             |
| C          |             | 7.27044100  | -0.35197200 |
| 0.66645700 |             |             |             |
| H          |             | 5.26139000  | -0.72300900 |
| 1.36379500 |             |             |             |
| C          | 7.45289400  | 0.54496300  | -           |
| 1.56841900 |             |             |             |
| H          | 5.58711300  | 0.86846700  | -           |
| 2.60447600 |             |             |             |
| C          | 8.06120100  | 0.10488200  | -           |
| 0.39056700 |             |             |             |
| H          |             | 7.73559400  | -0.69405800 |
| 1.58738200 |             |             |             |
| H          | 8.06111400  | 0.89785300  | -           |
| 2.39713200 |             |             |             |
| H          | 9.14381500  | 0.11718400  | -           |
| 0.29721900 |             |             |             |
| C          | 0.31486800  | -4.89458800 | -           |
| 0.78663900 |             |             |             |
| C          | 0.88170700  | -5.73010900 | -           |
| 1.76080900 |             |             |             |
| C          |             | -0.27956500 | -5.48327700 |
| 0.34089900 |             |             |             |
| C          | 0.86110700  | -7.11751000 | -           |

|                        |             |             |   |  |
|------------------------|-------------|-------------|---|--|
| 1.60890400             |             |             |   |  |
| H                      | 1.33640900  | -5.28182300 | - |  |
| 2.63976000             |             |             |   |  |
| C                      | -0.30265400 | -6.86994800 | - |  |
| 0.49284900             |             |             |   |  |
| H                      | -0.72919000 | -4.84111100 | - |  |
| 1.09306800             |             |             |   |  |
| C                      | 0.26976500  | -7.69167000 | - |  |
| 0.48120300             |             |             |   |  |
| H                      | 1.30158900  | -7.74992800 | - |  |
| 2.37527400             |             |             |   |  |
| H                      | -0.76677400 | -7.30843800 | - |  |
| 1.37250200             |             |             |   |  |
| H                      | 0.25219200  | -8.77190900 | - |  |
| 0.36387800             |             |             |   |  |
| C                      | -4.60020500 | 0.02062600  | - |  |
| 1.48579600             |             |             |   |  |
| C                      | -5.40891300 | 0.35065600  | - |  |
| 0.38790500             |             |             |   |  |
| C                      | -5.21327500 | -0.31927200 | - |  |
| 2.70027600             |             |             |   |  |
| C                      | -6.79972100 | 0.34480500  | - |  |
| 0.50436400             |             |             |   |  |
| H                      | -4.93796500 | 0.59221100  | - |  |
| 0.56005400             |             |             |   |  |
| C                      | -6.60447800 | -0.32598700 | - |  |
| 2.81668900             |             |             |   |  |
| H                      | -4.59025800 | -0.57694200 | - |  |
| 3.55236600             |             |             |   |  |
| C                      | -7.40150300 | 0.00747300  | - |  |
| 1.71910500             |             |             |   |  |
| H                      | -7.41358200 | 0.59956000  | - |  |
| 0.35589100             |             |             |   |  |
| H                      | -7.06502400 | -0.58874900 | - |  |
| 3.76546500             |             |             |   |  |
| H                      | -8.48452300 | 0.00279400  | - |  |
| 1.80961200             |             |             |   |  |
| <b><sup>6</sup>TS2</b> |             |             |   |  |
| Mn                     | 0.02613100  | 0.13628200  | - |  |
| 0.58397500             |             |             |   |  |
| N                      | -2.02151500 | 0.34060200  | - |  |
| 1.13079000             |             |             |   |  |
| C                      | 2.72325800  | 2.34081400  | - |  |



|            |             |             |   |  |
|------------|-------------|-------------|---|--|
| 0.96674800 |             |             |   |  |
| C          | -2.15799800 | 2.81142300  | - |  |
| 0.98122700 |             |             |   |  |
| C          | -0.22454900 | 4.45598500  | - |  |
| 0.86249100 |             |             |   |  |
| C          | 1.13461100  | 4.32689600  | - |  |
| 0.87316500 |             |             |   |  |
| C          | -0.77897700 | 3.11988300  | - |  |
| 0.95792000 |             |             |   |  |
| C          | 1.42806900  | 2.91047000  | - |  |
| 0.98342100 |             |             |   |  |
| H          | 1.86839000  | 5.11769200  | - |  |
| 0.81222800 |             |             |   |  |
| H          | -0.79891400 | 5.36984100  | - |  |
| 0.80476900 |             |             |   |  |
| N          | -0.15603600 | -1.92826200 | - |  |
| 1.08341500 |             |             |   |  |
| N          | 0.24756400  | 2.21229400  | - |  |
| 1.02983000 |             |             |   |  |
| N          | 2.11714400  | -0.06553000 | - |  |
| 0.96774900 |             |             |   |  |
| C          | -2.62933500 | -2.06337100 | - |  |
| 1.17822800 |             |             |   |  |
| C          | 2.24686000  | -2.53992700 | - |  |
| 1.04074300 |             |             |   |  |
| C          | 4.23211900  | -0.95332100 | - |  |
| 1.11531900 |             |             |   |  |
| C          | -4.14013800 | 1.23428700  | - |  |
| 1.16352600 |             |             |   |  |
| C          | 0.30885100  | -4.18167300 | - |  |
| 1.09445200 |             |             |   |  |
| C          | 4.36375700  | 0.40365000  | - |  |
| 1.09734400 |             |             |   |  |
| C          | -4.27157900 | -0.12272100 | - |  |
| 1.22578100 |             |             |   |  |
| C          | -1.04613900 | -4.04895400 | - |  |
| 1.13791600 |             |             |   |  |
| C          | 2.81310700  | -1.24382500 | - |  |
| 1.02950200 |             |             |   |  |
| C          | -2.72029900 | 1.52238800  | - |  |
| 1.10529900 |             |             |   |  |
| C          | 0.86777500  | -2.84214200 | - |  |
| 1.07563500 |             |             |   |  |
| C          | 3.02677800  | 0.96013200  | - |  |

|            |             |             |   |  |
|------------|-------------|-------------|---|--|
| 1.00015700 |             |             |   |  |
| C          | -2.93324400 | -0.68233900 | - |  |
| 1.20728200 |             |             |   |  |
| C          | -1.33476700 | -2.62643000 | - |  |
| 1.12670600 |             |             |   |  |
| H          | 5.27681000  | 0.97686800  | - |  |
| 1.17149700 |             |             |   |  |
| H          | -5.18916200 | -0.69135400 | - |  |
| 1.27159200 |             |             |   |  |
| H          | -1.78314600 | -4.83776100 | - |  |
| 1.18084000 |             |             |   |  |
| H          | 5.01748100  | -1.69016300 | - |  |
| 1.20486700 |             |             |   |  |
| H          | -4.93094000 | 1.97096100  | - |  |
| 1.15493100 |             |             |   |  |
| H          | 0.87908400  | -5.09895300 | - |  |
| 1.07863200 |             |             |   |  |
| C          | -3.78338100 | -3.01428600 | - |  |
| 1.14582100 |             |             |   |  |
| C          | -4.02583300 | -3.78407300 | - |  |
| 0.00374500 |             |             |   |  |
| C          | -4.64715600 | -3.15245600 | - |  |
| 2.24265900 |             |             |   |  |
| C          | -5.10606600 | -4.66592000 | - |  |
| 0.05530000 |             |             |   |  |
| H          | -3.35708400 | -3.68240000 | - |  |
| 0.85464800 |             |             |   |  |
| C          | -5.72802900 | -4.03416800 | - |  |
| 2.19128100 |             |             |   |  |
| H          | -4.46161200 | -2.56395100 | - |  |
| 3.13684900 |             |             |   |  |
| C          | -5.96128200 | -4.79311900 | - |  |
| 1.04194000 |             |             |   |  |
| H          | -5.28198600 | -5.25104000 | - |  |
| 0.95436500 |             |             |   |  |
| H          | -6.38508800 | -4.13182400 | - |  |
| 3.05158300 |             |             |   |  |
| H          | -6.80277700 | -5.47967000 | - |  |
| 1.00229900 |             |             |   |  |
| C          | -3.11015500 | 3.95476000  | - |  |
| 0.82052000 |             |             |   |  |
| C          | -3.89853500 | 4.40564100  | - |  |
| 1.88904400 |             |             |   |  |
| C          | -3.23497700 | 4.59147100  | - |  |

|            |             |             |   |
|------------|-------------|-------------|---|
| 0.42428000 |             |             |   |
| C          | -4.79198600 | 5.46461300  | - |
| 1.71691800 |             |             |   |
| H          | -3.80423500 | 3.91871800  | - |
| 2.85565700 |             |             |   |
| C          | -4.12603300 | 5.65146300  |   |
| 0.59733000 |             |             |   |
| H          | -2.62659500 | 4.24244500  |   |
| 1.25469400 |             |             |   |
| C          | -4.90826800 | 6.09059000  | - |
| 0.47363700 |             |             |   |
| H          | -5.39407600 | 5.80347600  | - |
| 2.55595300 |             |             |   |
| H          | -4.21241200 | 6.13182800  |   |
| 1.56864300 |             |             |   |
| H          | -5.60332600 | 6.91526800  | - |
| 0.34035100 |             |             |   |
| C          | 3.87946700  | 3.28319100  | - |
| 0.87323300 |             |             |   |
| C          | 4.15831500  | 4.19917600  | - |
| 1.89943000 |             |             |   |
| C          | 4.71010200  | 3.27027800  |   |
| 0.25925100 |             |             |   |
| C          | 5.23643400  | 5.07936200  | - |
| 1.79596600 |             |             |   |
| H          | 3.52309100  | 4.21147600  | - |
| 2.78059700 |             |             |   |
| C          | 5.78851500  | 4.14947900  |   |
| 0.36337100 |             |             |   |
| H          | 4.49624200  | 2.56416800  |   |
| 1.05679200 |             |             |   |
| C          | 6.05497500  | 5.05769700  | - |
| 0.66414400 |             |             |   |
| H          | 5.44052300  | 5.77830400  | - |
| 2.60289900 |             |             |   |
| H          | 6.41950200  | 4.12749600  |   |
| 1.24836900 |             |             |   |
| H          | 6.89511600  | 5.74241000  | - |
| 0.58434200 |             |             |   |
| C          | 3.20106100  | -3.69100500 | - |
| 1.01546200 |             |             |   |
| C          | 4.00410900  | -3.92035400 |   |
| 0.11272000 |             |             |   |
| C          | 3.31830700  | -4.56058100 | - |

|            |             |             |   |
|------------|-------------|-------------|---|
| 2.11073700 |             |             |   |
| C          | 4.89786600  | -4.99109700 |   |
| 0.14707100 |             |             |   |
| H          | 3.91399100  | -3.25374900 |   |
| 0.96540800 |             |             |   |
| C          | 4.21184000  | -5.63211200 | - |
| 2.07782200 |             |             |   |
| H          | 2.70378600  | -4.38602200 | - |
| 2.98936900 |             |             |   |
| C          | 5.00441900  | -5.85093000 | - |
| 0.94857800 |             |             |   |
| H          | 5.50733300  | -5.15680600 |   |
| 1.03170500 |             |             |   |
| H          | 4.29234300  | -6.29300500 | - |
| 2.93694100 |             |             |   |
| H          | 5.70016500  | -6.68539800 | - |
| 0.92273900 |             |             |   |
| N          | 0.73981600  | -1.65433800 |   |
| 1.96063900 |             |             |   |
| N          | 1.30433100  | -2.77295500 |   |
| 2.17881500 |             |             |   |
| N          | 0.93765900  | -3.85653400 |   |
| 2.44625400 |             |             |   |
| C          | 1.33908100  | -0.44286400 |   |
| 2.26866600 |             |             |   |
| C          | 2.40643000  | -0.27152400 |   |
| 3.16526100 |             |             |   |
| C          | 1.07953300  | 1.83737100  |   |
| 2.01999400 |             |             |   |
| C          | 2.80350200  | 1.02469700  |   |
| 3.47155600 |             |             |   |
| H          | 2.89221600  | -1.13807100 |   |
| 3.60113300 |             |             |   |
| C          | 2.11554800  | 2.10561000  |   |
| 2.91120700 |             |             |   |
| H          | 0.53364100  | 2.63687800  |   |
| 1.53203500 |             |             |   |
| H          | 3.63193400  | 1.19110300  |   |
| 4.15470800 |             |             |   |
| H          | 2.38798400  | 3.13081800  |   |
| 3.13682000 |             |             |   |
| N          | 0.71237400  | 0.59464500  |   |
| 1.67827800 |             |             |   |
| C          | -1.33058700 | -2.32743100 |   |

|            |             |             |   |
|------------|-------------|-------------|---|
| 2.89346800 |             |             |   |
| C          | -1.04483100 | -3.53613600 |   |
| 2.89223600 |             |             |   |
| C          | -1.82871900 | -0.99579900 |   |
| 3.05539600 |             |             |   |
| C          | -2.74416000 | -0.44883300 |   |
| 2.14041200 |             |             |   |
| C          | -1.36806300 | -0.20480100 |   |
| 4.12769000 |             |             |   |
| C          | -3.17288800 | 0.86953600  |   |
| 2.28388800 |             |             |   |
| H          | -3.10166100 | -1.05187100 |   |
| 1.31576300 |             |             |   |
| C          | -1.80293900 | 1.10972800  |   |
| 4.26474900 |             |             |   |
| H          | -0.65499800 | -0.62574300 |   |
| 4.83000300 |             |             |   |
| C          | -2.69961300 | 1.65308800  |   |
| 3.33847300 |             |             |   |
| H          | -3.86508900 | 1.28232100  |   |
| 1.55806000 |             |             |   |
| H          | -1.43601400 | 1.71392400  |   |
| 5.08991000 |             |             |   |
| H          | -3.03258700 | 2.68269100  |   |
| 3.44020100 |             |             |   |
| H          | -1.30553100 | -4.55632200 |   |
| 3.08356100 |             |             |   |
| <b>3</b>   |             |             |   |
| N          | -0.76627900 | 1.20106300  |   |
| 0.02781600 |             |             |   |
| N          | -1.35008100 | 2.44064400  |   |
| 0.03993800 |             |             |   |
| N          | -0.39832200 | 3.32170200  |   |
| 0.02760500 |             |             |   |
| C          | -1.60955300 | 0.05909700  | - |
| 0.07143500 |             |             |   |
| C          | -3.66756600 | -1.04217000 |   |
| 0.41339600 |             |             |   |
| C          | -1.92341300 | -2.04342000 | - |
| 0.88817100 |             |             |   |
| C          | -3.19265900 | -2.13449700 | - |
| 0.31676300 |             |             |   |
| H          | -4.64979700 | -1.06852700 |   |

|                         |             |             |   |
|-------------------------|-------------|-------------|---|
| 0.87631400              |             |             |   |
| H                       | -1.51250100 | -2.86809000 | - |
| 1.46683700              |             |             |   |
| H                       | -3.78897000 | -3.03267000 | - |
| 0.44196300              |             |             |   |
| C                       | 0.60253700  | 1.31219900  | - |
| 0.00049300              |             |             |   |
| C                       | 0.80271600  | 2.68007800  |   |
| 0.00068900              |             |             |   |
| C                       | 1.59259400  | 0.23031900  |   |
| 0.06473500              |             |             |   |
| C                       | 1.43574000  | -0.86570100 |   |
| 0.92825300              |             |             |   |
| C                       | 2.76374300  | 0.33104000  | - |
| 0.70138000              |             |             |   |
| C                       | 2.42507800  | -1.84168500 |   |
| 1.01397400              |             |             |   |
| H                       | 0.54140200  | -0.94536500 |   |
| 1.53797100              |             |             |   |
| C                       | 3.75391000  | -0.64729600 | - |
| 0.61215100              |             |             |   |
| H                       | 2.88446600  | 1.17126000  | - |
| 1.37914400              |             |             |   |
| C                       | 3.58708800  | -1.73734000 |   |
| 0.24373100              |             |             |   |
| H                       | 2.29184500  | -2.68373900 |   |
| 1.68771200              |             |             |   |
| H                       | 4.65271800  | -0.55947100 | - |
| 1.21629400              |             |             |   |
| H                       | 4.35707600  | -2.50089200 |   |
| 0.31209400              |             |             |   |
| H                       | 1.73940600  | 3.21800200  |   |
| 0.02022400              |             |             |   |
| C                       | -2.86173000 | 0.08383000  |   |
| 0.55357100              |             |             |   |
| N                       | -1.14125500 | -0.96273900 | - |
| 0.78227400              |             |             |   |
| H                       | -3.17498400 | 0.95808700  |   |
| 1.11058900              |             |             |   |
| <b><sup>2</sup>INT3</b> |             |             |   |
| Mn                      | -0.27315600 | 0.11377900  | - |
| 0.48197900              |             |             |   |
| N                       | -0.10358700 | -1.91246800 | - |

|            |             |             |   |  |
|------------|-------------|-------------|---|--|
| 0.57537600 |             |             |   |  |
| C          | -2.90810000 | 2.32391800  | - |  |
| 0.20171100 |             |             |   |  |
| C          | -2.49909300 | -2.54073900 | - |  |
| 0.45019900 |             |             |   |  |
| C          | -4.41015900 | -0.94972000 | - |  |
| 0.08914100 |             |             |   |  |
| C          | -4.52214800 | 0.40442500  | - |  |
| 0.00506300 |             |             |   |  |
| C          | -3.01797000 | -1.24378800 | - |  |
| 0.32793200 |             |             |   |  |
| C          | -3.20082400 | 0.95120600  | - |  |
| 0.20161900 |             |             |   |  |
| H          | -5.41367100 | 0.98415100  |   |  |
| 0.18379200 |             |             |   |  |
| H          | -5.19157000 | -1.68758400 |   |  |
| 0.01859900 |             |             |   |  |
| N          | 1.72959300  | 0.28294400  | - |  |
| 0.76316100 |             |             |   |  |
| N          | -2.29066100 | -0.07077000 | - |  |
| 0.37729500 |             |             |   |  |
| N          | -0.45225400 | 2.12278900  | - |  |
| 0.46330700 |             |             |   |  |
| C          | 2.36242000  | -2.11400100 | - |  |
| 0.75256600 |             |             |   |  |
| C          | 1.93195000  | 2.75116300  | - |  |
| 0.69172400 |             |             |   |  |
| C          | 0.02651000  | 4.38206200  | - |  |
| 0.55589600 |             |             |   |  |
| C          | -0.60043100 | -4.16540600 | - |  |
| 0.72582800 |             |             |   |  |
| C          | 3.86815900  | 1.15839200  | - |  |
| 0.81025900 |             |             |   |  |
| C          | -1.32290800 | 4.26412600  | - |  |
| 0.42562000 |             |             |   |  |
| C          | 0.75514000  | -4.04809700 | - |  |
| 0.78688800 |             |             |   |  |
| C          | 3.99049300  | -0.19709400 | - |  |
| 0.80992700 |             |             |   |  |
| C          | 0.56712100  | 3.04353800  | - |  |
| 0.57043800 |             |             |   |  |
| C          | -1.13323200 | -2.83322100 | - |  |
| 0.57969100 |             |             |   |  |
| C          | 2.45675600  | 1.45457500  | - |  |

|            |             |             |   |
|------------|-------------|-------------|---|
| 0.77578000 |             |             |   |
| C          | -1.61762800 | 2.85199300  | - |
| 0.35276200 |             |             |   |
| C          | 1.06269900  | -2.64129200 | - |
| 0.69211400 |             |             |   |
| C          | 2.65382900  | -0.74224600 | - |
| 0.78716900 |             |             |   |
| H          | -2.05740300 | 5.05539200  | - |
| 0.39362600 |             |             |   |
| H          | 1.48235500  | -4.83681900 | - |
| 0.91303400 |             |             |   |
| H          | 4.90069000  | -0.77810200 | - |
| 0.80437200 |             |             |   |
| H          | 0.60755400  | 5.28790300  | - |
| 0.65033400 |             |             |   |
| H          | -1.19093200 | -5.06780100 | - |
| 0.78639600 |             |             |   |
| H          | 4.65896500  | 1.89406500  | - |
| 0.80669800 |             |             |   |
| C          | 1.97588800  | -1.47962600 |   |
| 2.77667100 |             |             |   |
| C          | 1.31925200  | -0.28831100 |   |
| 2.43707100 |             |             |   |
| C          | 3.23930500  | 0.93159900  |   |
| 2.56032300 |             |             |   |
| C          | 3.99794500  | -0.18671800 |   |
| 2.90840100 |             |             |   |
| C          | 3.34461400  | -1.41477300 |   |
| 3.01905700 |             |             |   |
| H          | 1.43982100  | -2.42239600 |   |
| 2.81999300 |             |             |   |
| H          | 3.70725400  | 1.90646100  |   |
| 2.44234400 |             |             |   |
| H          | 5.06672200  | -0.09798800 |   |
| 3.07238800 |             |             |   |
| H          | 3.89562200  | -2.31666800 |   |
| 3.26907100 |             |             |   |
| N          | -0.06797800 | -0.23960200 |   |
| 2.10124300 |             |             |   |
| N          | 1.92283900  | 0.89309600  |   |
| 2.33280000 |             |             |   |
| N          | -1.51211500 | -2.04859500 |   |
| 2.63425500 |             |             |   |
| N          | -0.76325300 | -1.22175700 |   |



|            |             |            |   |
|------------|-------------|------------|---|
| 2.41479400 |             |            |   |
| C          | -4.04166700 | 3.28364700 | - |
| 0.03360000 |             |            |   |
| C          | -5.03945500 | 3.39629500 | - |
| 1.01432100 |             |            |   |
| C          | -4.12845300 | 4.09314100 |   |
| 1.10984900 |             |            |   |
| C          | -6.09639800 | 4.29367200 | - |
| 0.85605400 |             |            |   |
| H          | -4.97685900 | 2.77500500 | - |
| 1.90332700 |             |            |   |
| C          | -5.18480800 | 4.99103300 |   |
| 1.26891300 |             |            |   |
| H          | -3.36007200 | 4.00976000 |   |
| 1.87328900 |             |            |   |
| C          | -6.17229100 | 5.09392700 |   |
| 0.28631900 |             |            |   |
| H          | -6.85788400 | 4.37084800 | - |
| 1.62771900 |             |            |   |
| H          | -5.23835900 | 5.60713300 |   |
| 2.16269600 |             |            |   |
| H          | -6.99509600 | 5.79303300 |   |
| 0.40980400 |             |            |   |
| C          | 2.89584100  | 3.89275400 | - |
| 0.66504800 |             |            |   |
| C          | 3.65480000  | 4.23423900 | - |
| 1.79396200 |             |            |   |
| C          | 3.06646200  | 4.63588000 |   |
| 0.51394600 |             |            |   |
| C          | 4.56342300  | 5.29300400 | - |
| 1.74613300 |             |            |   |
| H          | 3.52552700  | 3.66322200 | - |
| 2.70917200 |             |            |   |
| C          | 3.97487100  | 5.69422100 |   |
| 0.56237600 |             |            |   |
| H          | 2.47887400  | 4.37144700 |   |
| 1.38900100 |             |            |   |
| C          | 4.72629300  | 6.02558000 | - |
| 0.56794100 |             |            |   |
| H          | 5.14107600  | 5.54801000 | - |
| 2.63078700 |             |            |   |
| H          | 4.09755400  | 6.25825200 |   |
| 1.48339600 |             |            |   |
| H          | 5.43347900  | 6.84994500 | - |

|            |             |             |   |
|------------|-------------|-------------|---|
| 0.53120300 |             |             |   |
| C          | 3.50443300  | -3.07690100 | - |
| 0.76525300 |             |             |   |
| C          | 4.36589400  | -3.16854500 | - |
| 1.86958900 |             |             |   |
| C          | 3.73958700  | -3.91335100 |   |
| 0.33787700 |             |             |   |
| C          | 5.43520300  | -4.06537400 | - |
| 1.86833600 |             |             |   |
| H          | 4.18711900  | -2.53087700 | - |
| 2.73061500 |             |             |   |
| C          | 4.80724200  | -4.81144300 |   |
| 0.34054700 |             |             |   |
| H          | 3.07407400  | -3.85055300 |   |
| 1.19346400 |             |             |   |
| C          | 5.66036500  | -4.88906600 | - |
| 0.76286500 |             |             |   |
| H          | 6.08893300  | -4.12497200 | - |
| 2.73452500 |             |             |   |
| H          | 4.97417100  | -5.44924400 |   |
| 1.20485600 |             |             |   |
| H          | 6.49230900  | -5.58816500 | - |
| 0.76255300 |             |             |   |
| C          | -3.45935400 | -3.68501200 | - |
| 0.39966600 |             |             |   |
| C          | -4.38659500 | -3.88949100 | - |
| 1.43265600 |             |             |   |
| C          | -3.45418000 | -4.57192600 |   |
| 0.68819500 |             |             |   |
| C          | -5.28492600 | -4.95642000 | - |
| 1.38179100 |             |             |   |
| H          | -4.39504400 | -3.20530900 | - |
| 2.27659100 |             |             |   |
| C          | -4.35231400 | -5.63874800 |   |
| 0.73942200 |             |             |   |
| H          | -2.74497200 | -4.40980600 |   |
| 1.49451500 |             |             |   |
| C          | -5.26978700 | -5.83465800 | - |
| 0.29568100 |             |             |   |
| H          | -5.99378600 | -5.10347100 | - |
| 2.19245400 |             |             |   |
| H          | -4.33906600 | -6.31386600 |   |
| 1.59116000 |             |             |   |
| H          | -5.96921800 | -6.66547800 | - |

0.25562600

**4INT3**

|            |             |             |   |
|------------|-------------|-------------|---|
| Mn         | -0.27711500 | 0.11271100  | - |
| 0.49846000 |             |             |   |
| N          | -0.46817100 | 2.12429700  | - |
| 0.46712200 |             |             |   |
| C          | -2.48394400 | -2.55486000 | - |
| 0.43836500 |             |             |   |
| C          | -2.92621100 | 2.30901900  | - |
| 0.21612700 |             |             |   |
| C          | -4.52837200 | 0.37970800  | - |
| 0.01405500 |             |             |   |
| C          | -4.40680900 | -0.97427100 | - |
| 0.08778100 |             |             |   |
| C          | -3.21060700 | 0.93439300  | - |
| 0.21326900 |             |             |   |
| C          | -3.01245300 | -1.26059400 | - |
| 0.32469500 |             |             |   |
| H          | -5.18311300 | -1.71659800 |   |
| 0.02608900 |             |             |   |
| H          | -5.42388700 | 0.95443300  |   |
| 0.17122300 |             |             |   |
| N          | 1.72893500  | 0.29547900  | - |
| 0.76834800 |             |             |   |
| N          | -2.29428500 | -0.08294000 | - |
| 0.38291900 |             |             |   |
| N          | -0.09177400 | -1.91253400 | - |
| 0.57030400 |             |             |   |
| C          | 1.91439800  | 2.76469400  | - |
| 0.68234300 |             |             |   |
| C          | 2.37508800  | -2.09790100 | - |
| 0.76352000 |             |             |   |
| C          | 0.77934900  | -4.04239800 | - |
| 0.78294300 |             |             |   |
| C          | -1.35015900 | 4.25995400  | - |
| 0.42419700 |             |             |   |
| C          | 3.99189400  | -0.17006400 | - |
| 0.82291400 |             |             |   |
| C          | -0.57512500 | -4.16820500 | - |
| 0.71267400 |             |             |   |
| C          | -0.00040500 | 4.38550600  | - |
| 0.54533400 |             |             |   |
| C          | 3.86119300  | 1.18458800  | - |

|            |             |             |   |  |
|------------|-------------|-------------|---|--|
| 0.81504000 |             |             |   |  |
| C          | 1.07905100  | -2.63361600 | - |  |
| 0.69303100 |             |             |   |  |
| C          | -1.63795500 | 2.84587300  | - |  |
| 0.35978200 |             |             |   |  |
| C          | 2.65855900  | -0.72393600 | - |  |
| 0.79825200 |             |             |   |  |
| C          | -1.11609700 | -2.83924700 | - |  |
| 0.56796400 |             |             |   |  |
| C          | 0.54724200  | 3.04977500  | - |  |
| 0.56389000 |             |             |   |  |
| C          | 2.44786300  | 1.47198800  | - |  |
| 0.77520300 |             |             |   |  |
| H          | -1.15982000 | -5.07472200 | - |  |
| 0.76766000 |             |             |   |  |
| H          | 0.57641500  | 5.29492200  | - |  |
| 0.63104400 |             |             |   |  |
| H          | 4.64762100  | 1.92492300  | - |  |
| 0.80862300 |             |             |   |  |
| H          | 1.51021400  | -4.82713900 | - |  |
| 0.91259100 |             |             |   |  |
| H          | -2.08866000 | 5.04746900  | - |  |
| 0.39209900 |             |             |   |  |
| H          | 4.90585900  | -0.74512300 | - |  |
| 0.82226100 |             |             |   |  |
| C          | -4.06708400 | 3.26127800  | - |  |
| 0.05490600 |             |             |   |  |
| C          | -5.06069300 | 3.36516500  | - |  |
| 1.04080000 |             |             |   |  |
| C          | -4.16579900 | 4.07134900  |   |  |
| 1.08717700 |             |             |   |  |
| C          | -6.12499400 | 4.25496600  | - |  |
| 0.88917400 |             |             |   |  |
| H          | -4.98912900 | 2.74300300  | - |  |
| 1.92852700 |             |             |   |  |
| C          | -5.22952300 | 4.96165800  |   |  |
| 1.23957300 |             |             |   |  |
| H          | -3.40102700 | 3.99426300  |   |  |
| 1.85487700 |             |             |   |  |
| C          | -6.21259500 | 5.05613100  |   |  |
| 0.25171500 |             |             |   |  |
| H          | -6.88311900 | 4.32544500  | - |  |
| 1.66477400 |             |             |   |  |
| H          | -5.29231400 | 5.57831800  |   |  |

|            |             |             |   |
|------------|-------------|-------------|---|
| 2.13236000 |             |             |   |
| H          | -7.04113400 | 5.74932100  |   |
| 0.37006000 |             |             |   |
| C          | -3.43623600 | -3.70547800 | - |
| 0.38127600 |             |             |   |
| C          | -3.42127200 | -4.58964300 |   |
| 0.70879400 |             |             |   |
| C          | -4.36549000 | -3.91909900 | - |
| 1.41069300 |             |             |   |
| C          | -4.31189700 | -5.66247900 |   |
| 0.76556200 |             |             |   |
| H          | -2.71070900 | -4.42054900 |   |
| 1.51238800 |             |             |   |
| C          | -5.25625100 | -4.99203900 | - |
| 1.35420800 |             |             |   |
| H          | -4.38145600 | -3.23720400 | - |
| 2.25637700 |             |             |   |
| C          | -5.23143800 | -5.86739600 | - |
| 0.26594300 |             |             |   |
| H          | -4.29115900 | -6.33529400 |   |
| 1.61897000 |             |             |   |
| H          | -5.96669300 | -5.14605500 | - |
| 2.16218800 |             |             |   |
| H          | -5.92496600 | -6.70292600 | - |
| 0.22146600 |             |             |   |
| C          | 3.52310500  | -3.05340800 | - |
| 0.78397800 |             |             |   |
| C          | 3.76704400  | -3.89412300 |   |
| 0.31411500 |             |             |   |
| C          | 4.38248200  | -3.13346200 | - |
| 1.89090500 |             |             |   |
| C          | 4.84103500  | -4.78459600 |   |
| 0.30950500 |             |             |   |
| H          | 3.10283500  | -3.84121400 |   |
| 1.17135100 |             |             |   |
| C          | 5.45817800  | -4.02258700 | - |
| 1.89691600 |             |             |   |
| H          | 4.19708700  | -2.49279000 | - |
| 2.74829000 |             |             |   |
| C          | 5.69207800  | -4.85030800 | - |
| 0.79629200 |             |             |   |
| H          | 5.01446800  | -5.42574000 |   |
| 1.17004000 |             |             |   |
| H          | 6.11006100  | -4.07304400 | - |

|            |             |             |   |
|------------|-------------|-------------|---|
| 2.76507100 |             |             |   |
| H          | 6.52901900  | -5.54338200 | - |
| 0.80162000 |             |             |   |
| C          | 2.87154200  | 3.91163600  | - |
| 0.64172500 |             |             |   |
| C          | 3.03456200  | 4.64255400  |   |
| 0.54599100 |             |             |   |
| C          | 3.63111300  | 4.27023300  | - |
| 1.76482000 |             |             |   |
| C          | 3.93658500  | 5.70560400  |   |
| 0.60861600 |             |             |   |
| H          | 2.44613800  | 4.36489600  |   |
| 1.41640600 |             |             |   |
| C          | 4.53328500  | 5.33380400  | - |
| 1.70276200 |             |             |   |
| H          | 3.50753800  | 3.70879200  | - |
| 2.68672300 |             |             |   |
| C          | 4.68886800  | 6.05401600  | - |
| 0.51599900 |             |             |   |
| H          | 4.05351100  | 6.26004200  |   |
| 1.53617500 |             |             |   |
| H          | 5.11159500  | 5.60217200  | - |
| 2.58301800 |             |             |   |
| H          | 5.39106000  | 6.88206700  | - |
| 0.46821200 |             |             |   |
| C          | 2.00371400  | -1.47162800 |   |
| 2.76302200 |             |             |   |
| C          | 1.31972100  | -0.28489800 |   |
| 2.46220100 |             |             |   |
| C          | 3.22691300  | 0.95964900  |   |
| 2.54152500 |             |             |   |
| C          | 4.01142800  | -0.15273800 |   |
| 2.84870300 |             |             |   |
| C          | 3.37854300  | -1.39119000 |   |
| 2.96155000 |             |             |   |
| H          | 1.48231800  | -2.42235700 |   |
| 2.81125600 |             |             |   |
| H          | 3.67808600  | 1.94226900  |   |
| 2.42221000 |             |             |   |
| H          | 5.08370700  | -0.05154600 |   |
| 2.97904700 |             |             |   |
| H          | 3.94950200  | -2.28891000 |   |
| 3.17957700 |             |             |   |
| N          | -0.07799300 | -0.24674800 |   |

|            |             |             |  |
|------------|-------------|-------------|--|
| 2.17971600 |             |             |  |
| N          | 1.90464200  | 0.90626800  |  |
| 2.35499700 |             |             |  |
| N          | -1.46780000 | -2.11209500 |  |
| 2.65641000 |             |             |  |
| N          | -0.74391400 | -1.25826900 |  |
| 2.45648000 |             |             |  |

**6INT3**

|            |             |             |   |
|------------|-------------|-------------|---|
| Mn         | -0.26900900 | 0.12502900  | - |
| 0.25930100 |             |             |   |
| N          | -0.73452700 | 2.15814400  | - |
| 0.36384700 |             |             |   |
| C          | -2.16592900 | -2.80828300 | - |
| 0.46886300 |             |             |   |
| C          | -3.20329100 | 1.98592300  | - |
| 0.17794400 |             |             |   |
| C          | -4.58190500 | -0.14431000 |   |
| 0.01305900 |             |             |   |
| C          | -4.29495000 | -1.47536300 | - |
| 0.07398400 |             |             |   |
| C          | -3.34019500 | 0.57650400  | - |
| 0.18453700 |             |             |   |
| C          | -2.87245000 | -1.59123900 | - |
| 0.32299000 |             |             |   |
| H          | -4.98060800 | -2.30291400 |   |
| 0.03705200 |             |             |   |
| H          | -5.54422800 | 0.30685400  |   |
| 0.20700900 |             |             |   |
| N          | 1.73415500  | 0.56436100  | - |
| 0.75713200 |             |             |   |
| N          | -2.32477200 | -0.33114800 | - |
| 0.36677900 |             |             |   |
| N          | 0.15451000  | -1.92649700 | - |
| 0.55785100 |             |             |   |
| C          | 1.57027900  | 3.04037100  | - |
| 0.62237500 |             |             |   |
| C          | 2.62229000  | -1.75469400 | - |
| 0.79098700 |             |             |   |
| C          | 1.26412600  | -3.90120400 | - |
| 0.93277100 |             |             |   |
| C          | -1.88000200 | 4.14577000  | - |
| 0.42977200 |             |             |   |
| C          | 4.02197800  | 0.37057400  | - |

|            |             |             |   |  |
|------------|-------------|-------------|---|--|
| 0.74448900 |             |             |   |  |
| C          | -0.06741700 | -4.19219400 | - |  |
| 0.85792700 |             |             |   |  |
| C          | -0.55286700 | 4.43807400  | - |  |
| 0.54972000 |             |             |   |  |
| C          | 3.72751300  | 1.70234800  | - |  |
| 0.71184000 |             |             |   |  |
| C          | 1.40170100  | -2.47098700 | - |  |
| 0.74505400 |             |             |   |  |
| C          | -1.99155600 | 2.70562500  | - |  |
| 0.30580800 |             |             |   |  |
| C          | 2.76249000  | -0.34592900 | - |  |
| 0.77891200 |             |             |   |  |
| C          | -0.76489700 | -2.94644700 | - |  |
| 0.61458300 |             |             |   |  |
| C          | 0.16815200  | 3.18147600  | - |  |
| 0.50494300 |             |             |   |  |
| C          | 2.28378500  | 1.82193000  | - |  |
| 0.71397000 |             |             |   |  |
| H          | -0.53598400 | -5.15829200 | - |  |
| 0.97832800 |             |             |   |  |
| H          | -0.10454800 | 5.41212600  | - |  |
| 0.68343500 |             |             |   |  |
| H          | 4.42505600  | 2.52609600  | - |  |
| 0.66444000 |             |             |   |  |
| H          | 2.07483800  | -4.58754000 | - |  |
| 1.13100300 |             |             |   |  |
| H          | -2.70879800 | 4.83869500  | - |  |
| 0.44679700 |             |             |   |  |
| H          | 5.00201000  | -0.08326500 | - |  |
| 0.72429700 |             |             |   |  |
| C          | -4.45438500 | 2.79108100  | - |  |
| 0.03495500 |             |             |   |  |
| C          | -5.46900700 | 2.72484500  | - |  |
| 1.00357000 |             |             |   |  |
| C          | -4.63875100 | 3.63575800  | - |  |
| 1.07166500 |             |             |   |  |
| C          | -6.63479600 | 3.47962100  | - |  |
| 0.86903400 |             |             |   |  |
| H          | -5.33197800 | 2.07848600  | - |  |
| 1.86580800 |             |             |   |  |
| C          | -5.80420000 | 4.39092100  | - |  |
| 1.20720500 |             |             |   |  |
| H          | -3.85942300 | 3.69142000  | - |  |



|            |             |             |   |
|------------|-------------|-------------|---|
| 1.82640800 |             |             |   |
| C          | -6.80645400 | 4.31513500  |   |
| 0.23719900 |             |             |   |
| H          | -7.40665000 | 3.41911000  | - |
| 1.63185900 |             |             |   |
| H          | -5.93092200 | 5.03520000  |   |
| 2.07334100 |             |             |   |
| H          | -7.71424700 | 4.90326900  |   |
| 0.34217800 |             |             |   |
| C          | -2.97212000 | -4.06683500 | - |
| 0.45540300 |             |             |   |
| C          | -2.79783300 | -5.01700600 |   |
| 0.56371900 |             |             |   |
| C          | -3.91990300 | -4.32417600 | - |
| 1.45869600 |             |             |   |
| C          | -3.54981800 | -6.19227900 |   |
| 0.57825200 |             |             |   |
| H          | -2.07345200 | -4.81888700 |   |
| 1.34801300 |             |             |   |
| C          | -4.67191600 | -5.49948800 | - |
| 1.44492400 |             |             |   |
| H          | -4.05801600 | -3.59465800 | - |
| 2.25168800 |             |             |   |
| C          | -4.48892700 | -6.43772900 | - |
| 0.42631900 |             |             |   |
| H          | -3.40598400 | -6.91397000 |   |
| 1.37821400 |             |             |   |
| H          | -5.39727800 | -5.68431200 | - |
| 2.23295800 |             |             |   |
| H          | -5.07448900 | -7.35317900 | - |
| 0.41519300 |             |             |   |
| C          | 3.87621600  | -2.56415200 | - |
| 0.84650400 |             |             |   |
| C          | 4.19216000  | -3.45860200 |   |
| 0.18984200 |             |             |   |
| C          | 4.76774600  | -2.45319800 | - |
| 1.92587700 |             |             |   |
| C          | 5.36443500  | -4.21384400 |   |
| 0.15273600 |             |             |   |
| H          | 3.50629500  | -3.55261500 |   |
| 1.02613800 |             |             |   |
| C          | 5.94124400  | -3.20715500 | - |
| 1.96442800 |             |             |   |
| H          | 4.52810300  | -1.77238200 | - |

|            |            |             |   |
|------------|------------|-------------|---|
| 2.73750200 |            |             |   |
| C          | 6.24486700 | -4.08922100 | - |
| 0.92462000 |            |             |   |
| H          | 5.59161000 | -4.89835200 |   |
| 0.96615200 |            |             |   |
| H          | 6.61537900 | -3.11055800 | - |
| 2.81145100 |            |             |   |
| H          | 7.15825200 | -4.67715700 | - |
| 0.95541500 |            |             |   |
| C          | 2.37698000 | 4.29813400  | - |
| 0.62202600 |            |             |   |
| C          | 2.37868600 | 5.13839900  |   |
| 0.50344600 |            |             |   |
| C          | 3.15306300 | 4.66327500  | - |
| 1.73346000 |            |             |   |
| C          | 3.13640200 | 6.31009100  |   |
| 0.51767900 |            |             |   |
| H          | 1.78114800 | 4.85959100  |   |
| 1.36690400 |            |             |   |
| C          | 3.91073800 | 5.83507100  | - |
| 1.72018100 |            |             |   |
| H          | 3.15325600 | 4.02061700  | - |
| 2.60927400 |            |             |   |
| C          | 3.90528000 | 6.66209400  | - |
| 0.59430500 |            |             |   |
| H          | 3.12878900 | 6.94625800  |   |
| 1.39898400 |            |             |   |
| H          | 4.50122300 | 6.10476700  | - |
| 2.59193100 |            |             |   |
| H          | 4.49496600 | 7.57489900  | - |
| 0.58418200 |            |             |   |
| C          | 2.16000700 | -1.49331600 |   |
| 2.83432500 |            |             |   |
| C          | 1.38189000 | -0.37502000 |   |
| 2.50924600 |            |             |   |
| C          | 3.16913500 | 1.03508300  |   |
| 2.58133300 |            |             |   |
| C          | 4.04374100 | -0.00081800 |   |
| 2.91331800 |            |             |   |
| C          | 3.52127600 | -1.28791900 |   |
| 3.04235800 |            |             |   |
| H          | 1.72386100 | -2.48534700 |   |
| 2.89433200 |            |             |   |
| H          | 3.53201600 | 2.05123000  |   |

|            |             |             |  |
|------------|-------------|-------------|--|
| 2.44994700 |             |             |  |
| H          | 5.10180200  | 0.19548100  |  |
| 3.05040700 |             |             |  |
| H          | 4.16677200  | -2.12787900 |  |
| 3.28103700 |             |             |  |
| N          | -0.01348300 | -0.45733400 |  |
| 2.20189900 |             |             |  |
| N          | 1.85871600  | 0.86069500  |  |
| 2.38575600 |             |             |  |
| N          | -1.24403300 | -2.43173000 |  |
| 2.68744800 |             |             |  |
| N          | -0.59759800 | -1.52059500 |  |
| 2.48397800 |             |             |  |

**<sup>2</sup>TS3**

|            |             |             |   |
|------------|-------------|-------------|---|
| Mn         | -0.21591300 | 0.08547900  | - |
| 0.25614400 |             |             |   |
| N          | 0.07694000  | 2.05793500  | - |
| 0.48248900 |             |             |   |
| C          | -3.02520500 | -1.92943000 | - |
| 0.58341700 |             |             |   |
| C          | -2.23556500 | 2.85584100  | - |
| 0.10672200 |             |             |   |
| C          | -4.27593000 | 1.39989000  | - |
| 0.13629400 |             |             |   |
| C          | -4.49705800 | 0.07291300  | - |
| 0.33796600 |             |             |   |
| C          | -2.85185200 | 1.60508400  | - |
| 0.20473700 |             |             |   |
| C          | -3.20840700 | -0.54881700 | - |
| 0.48900900 |             |             |   |
| H          | -5.44103800 | -0.45173400 | - |
| 0.35092000 |             |             |   |
| H          | -5.00594100 | 2.17532800  |   |
| 0.04214400 |             |             |   |
| N          | 1.72072400  | -0.23773900 | - |
| 0.76090300 |             |             |   |
| N          | -2.20497100 | 0.39965400  | - |
| 0.41592400 |             |             |   |
| N          | -0.55260100 | -1.89305100 | - |
| 0.53627600 |             |             |   |
| C          | 2.51697400  | 2.10608600  | - |
| 0.88368400 |             |             |   |
| C          | 1.78808400  | -2.70081600 | - |

|            |             |             |   |  |
|------------|-------------|-------------|---|--|
| 0.53604900 |             |             |   |  |
| C          | -0.22985500 | -4.18528700 | - |  |
| 0.53078200 |             |             |   |  |
| C          | -0.24572200 | 4.34834600  | - |  |
| 0.38901500 |             |             |   |  |
| C          | 3.80764800  | -1.24179300 | - |  |
| 0.80095900 |             |             |   |  |
| C          | -1.57231200 | -3.96983500 | - |  |
| 0.59288700 |             |             |   |  |
| C          | 1.07322300  | 4.13993100  | - |  |
| 0.64756500 |             |             |   |  |
| C          | 4.00389000  | 0.09716700  | - |  |
| 0.94199500 |             |             |   |  |
| C          | 0.40248000  | -2.89075000 | - |  |
| 0.50600400 |             |             |   |  |
| C          | -0.86358300 | 3.05060300  | - |  |
| 0.28911700 |             |             |   |  |
| C          | 2.38708500  | -1.44934400 | - |  |
| 0.69873700 |             |             |   |  |
| C          | -1.76999700 | -2.54314900 | - |  |
| 0.57635300 |             |             |   |  |
| C          | 1.27579900  | 2.71329300  | - |  |
| 0.68228200 |             |             |   |  |
| C          | 2.70695900  | 0.72117600  | - |  |
| 0.89829100 |             |             |   |  |
| H          | -2.36400300 | -4.70245100 | - |  |
| 0.64885000 |             |             |   |  |
| H          | 1.84279800  | 4.87971800  | - |  |
| 0.81080200 |             |             |   |  |
| H          | 4.94235100  | 0.62359500  | - |  |
| 1.03184200 |             |             |   |  |
| H          | 0.29476900  | -5.12948900 | - |  |
| 0.53423700 |             |             |   |  |
| H          | -0.76706200 | 5.29030100  | - |  |
| 0.30274900 |             |             |   |  |
| H          | 4.55361900  | -2.02134400 | - |  |
| 0.75866800 |             |             |   |  |
| C          | -3.08248100 | 4.05808700  |   |  |
| 0.15901400 |             |             |   |  |
| C          | -3.99366400 | 4.52875600  | - |  |
| 0.79830000 |             |             |   |  |
| C          | -2.96268900 | 4.74621800  |   |  |
| 1.37580100 |             |             |   |  |
| C          | -4.77147600 | 5.65901300  | - |  |

|            |             |             |   |
|------------|-------------|-------------|---|
| 0.54281600 |             |             |   |
| H          | -4.08421200 | 4.00367400  | - |
| 1.74511300 |             |             |   |
| C          | -3.74116200 | 5.87587700  |   |
| 1.63163900 |             |             |   |
| H          | -2.25670900 | 4.38528600  |   |
| 2.11843700 |             |             |   |
| C          | -4.64776000 | 6.33504600  |   |
| 0.67328900 |             |             |   |
| H          | -5.47019700 | 6.01387300  | - |
| 1.29579600 |             |             |   |
| H          | -3.64095000 | 6.39531300  |   |
| 2.58092300 |             |             |   |
| H          | -5.25349700 | 7.21501900  |   |
| 0.87234900 |             |             |   |
| C          | -4.23997400 | -2.80054700 | - |
| 0.60167100 |             |             |   |
| C          | -4.61795500 | -3.50292200 |   |
| 0.55221600 |             |             |   |
| C          | -5.02195400 | -2.91739700 | - |
| 1.75878800 |             |             |   |
| C          | -5.75478200 | -4.31230200 |   |
| 0.54476900 |             |             |   |
| H          | -4.01860200 | -3.39621000 |   |
| 1.45179300 |             |             |   |
| C          | -6.15913900 | -3.72753300 | - |
| 1.76521700 |             |             |   |
| H          | -4.73212800 | -2.37128500 | - |
| 2.65238500 |             |             |   |
| C          | -6.52707900 | -4.42750700 | - |
| 0.61396300 |             |             |   |
| H          | -6.04028100 | -4.84854200 |   |
| 1.44591000 |             |             |   |
| H          | -6.75558600 | -3.81286200 | - |
| 2.66971900 |             |             |   |
| H          | -7.41243200 | -5.05770700 | - |
| 0.61887300 |             |             |   |
| C          | 2.66425200  | -3.90475400 | - |
| 0.41305600 |             |             |   |
| C          | 2.73286700  | -4.60225400 |   |
| 0.80242100 |             |             |   |
| C          | 3.42425200  | -4.36343900 | - |
| 1.49914700 |             |             |   |
| C          | 3.54547400  | -5.72926700 |   |

|            |            |             |   |
|------------|------------|-------------|---|
| 0.93057400 |            |             |   |
| H          | 2.14675600 | -4.24849800 |   |
| 1.64522200 |            |             |   |
| C          | 4.23751000 | -5.49058500 | - |
| 1.37154000 |            |             |   |
| H          | 3.36957800 | -3.83083800 | - |
| 2.44446100 |            |             |   |
| C          | 4.30080400 | -6.17621700 | - |
| 0.15619400 |            |             |   |
| H          | 3.59034200 | -6.25671200 |   |
| 1.87979200 |            |             |   |
| H          | 4.81743800 | -5.83580900 | - |
| 2.22333600 |            |             |   |
| H          | 4.93354700 | -7.05407500 | - |
| 0.05715100 |            |             |   |
| C          | 3.72227300 | 2.98080200  | - |
| 0.99722800 |            |             |   |
| C          | 4.14784800 | 3.73552500  |   |
| 0.10741400 |            |             |   |
| C          | 4.45740500 | 3.05143800  | - |
| 2.18927700 |            |             |   |
| C          | 5.28319300 | 4.54192200  |   |
| 0.02092000 |            |             |   |
| H          | 3.57653600 | 3.68145300  |   |
| 1.02989400 |            |             |   |
| C          | 5.59286100 | 3.85889400  | - |
| 2.27601000 |            |             |   |
| H          | 4.13158100 | 2.46914200  | - |
| 3.04672500 |            |             |   |
| C          | 6.00901000 | 4.60553500  | - |
| 1.17129400 |            |             |   |
| H          | 5.60265300 | 5.11784200  |   |
| 0.88547000 |            |             |   |
| H          | 6.15002300 | 3.90705300  | - |
| 3.20786800 |            |             |   |
| H          | 6.89323500 | 5.23356300  | - |
| 1.23913100 |            |             |   |
| C          | 1.62134300 | -1.44451300 |   |
| 2.74808400 |            |             |   |
| C          | 1.19650500 | -0.22515600 |   |
| 2.18479800 |            |             |   |
| C          | 3.23832400 | 0.74116700  |   |
| 2.58181400 |            |             |   |
| C          | 3.75203600 | -0.41443900 |   |

|            |             |             |  |
|------------|-------------|-------------|--|
| 3.17004300 |             |             |  |
| C          | 2.91302800  | -1.52745800 |  |
| 3.25416000 |             |             |  |
| H          | 0.95162700  | -2.29529100 |  |
| 2.76489000 |             |             |  |
| H          | 3.86039700  | 1.62871700  |  |
| 2.47651500 |             |             |  |
| H          | 4.77289600  | -0.44161500 |  |
| 3.53774000 |             |             |  |
| H          | 3.26879300  | -2.45936500 |  |
| 3.68594900 |             |             |  |
| N          | -0.09763100 | -0.03979700 |  |
| 1.63724400 |             |             |  |
| N          | 1.99208600  | 0.85142000  |  |
| 2.11222300 |             |             |  |
| N          | -2.19387100 | -1.02385300 |  |
| 2.24062600 |             |             |  |
| N          | -1.03948300 | -0.93765600 |  |
| 2.36573400 |             |             |  |

#### **<sup>4</sup>TS3**

|            |             |             |   |
|------------|-------------|-------------|---|
| Mn         | -0.23576100 | 0.06520800  | - |
| 0.29571600 |             |             |   |
| N          | 0.42874500  | 1.95684800  | - |
| 0.54301600 |             |             |   |
| C          | -3.35290600 | -1.37549500 | - |
| 0.64858300 |             |             |   |
| C          | -1.67065300 | 3.15529900  |   |
| 0.00616500 |             |             |   |
| C          | -3.95122800 | 2.09713700  |   |
| 0.05404200 |             |             |   |
| C          | -4.41982700 | 0.84753400  | - |
| 0.21516500 |             |             |   |
| C          | -2.51705800 | 2.04534900  | - |
| 0.06335500 |             |             |   |
| C          | -3.27560100 | 0.00664900  | - |
| 0.45116200 |             |             |   |
| H          | -5.44509600 | 0.50812800  | - |
| 0.21870800 |             |             |   |
| H          | -4.52156200 | 2.98043800  |   |
| 0.30042700 |             |             |   |
| N          | 1.62238600  | -0.59909200 | - |
| 0.76320900 |             |             |   |
| N          | -2.11473700 | 0.75297900  | - |

|            |             |             |  |   |
|------------|-------------|-------------|--|---|
| 0.34941700 |             |             |  |   |
| N          |             |             |  |   |
|            | -0.92189800 | -1.80555500 |  | - |
| 0.50384200 |             |             |  |   |
| C          |             |             |  |   |
|            | 2.81203400  | 1.55328100  |  | - |
| 1.05886600 |             |             |  |   |
| C          |             |             |  |   |
|            | 1.23284600  | -3.01577800 |  | - |
| 0.38952900 |             |             |  |   |
| C          |             |             |  |   |
|            | -1.01908300 | -4.11223600 |  | - |
| 0.54751000 |             |             |  |   |
| C          |             |             |  |   |
|            | 0.52268400  | 4.26364700  |  | - |
| 0.48478700 |             |             |  |   |
| C          |             |             |  |   |
|            | 3.49300900  | -1.94968600 |  | - |
| 0.64610800 |             |             |  |   |
| C          |             |             |  |   |
|            | -2.29214100 | -3.65366800 |  | - |
| 0.70153900 |             |             |  |   |
| C          |             |             |  |   |
|            | 1.75415400  | 3.82191900  |  | - |
| 0.85550400 |             |             |  |   |
| C          |             |             |  |   |
|            | 3.92551900  | -0.68609200 |  | - |
| 0.90704100 |             |             |  |   |
| C          |             |             |  |   |
|            | -0.16485100 | -2.95750300 |  | - |
| 0.43777000 |             |             |  |   |
| C          |             |             |  |   |
|            | -0.30402400 | 3.09700000  |  | - |
| 0.29560500 |             |             |  |   |
| C          |             |             |  |   |
|            | 2.05478000  | -1.89959800 |  | - |
| 0.58188700 |             |             |  |   |
| C          |             |             |  |   |
|            | -2.23471700 | -2.21508500 |  | - |
| 0.64059700 |             |             |  |   |
| C          |             |             |  |   |
|            | 1.70477000  | 2.38029000  |  | - |
| 0.84869900 |             |             |  |   |
| C          |             |             |  |   |
|            | 2.75993400  | 0.15882200  |  | - |
| 0.95518500 |             |             |  |   |
| H          |             |             |  |   |
|            | -3.19461500 | -4.23101900 |  | - |
| 0.83766300 |             |             |  |   |
| H          |             |             |  |   |
|            | 2.62110600  | 4.41192100  |  | - |
| 1.11270800 |             |             |  |   |
| H          |             |             |  |   |
|            | 4.94343400  | -0.34335600 |  | - |
| 1.01765800 |             |             |  |   |
| H          |             |             |  |   |
|            | -0.67556400 | -5.13647400 |  | - |
| 0.54714800 |             |             |  |   |
| H          |             |             |  |   |
|            | 0.18392700  | 5.28394300  |  | - |
| 0.38106500 |             |             |  |   |
| H          |             |             |  |   |
|            | 4.08930700  | -2.83888300 |  | - |
| 0.50637100 |             |             |  |   |
| C          |             |             |  |   |
|            | -2.25095900 | 4.48809500  |  |   |



|            |             |             |   |  |
|------------|-------------|-------------|---|--|
| 0.35002400 |             |             |   |  |
| C          | -3.14850400 | 5.13686600  | - |  |
| 0.51153300 |             |             |   |  |
| C          | -1.88375300 | 5.12190100  |   |  |
| 1.54699400 |             |             |   |  |
| C          | -3.67289300 | 6.38709100  | - |  |
| 0.18046700 |             |             |   |  |
| H          | -3.42672900 | 4.65587200  | - |  |
| 1.44505800 |             |             |   |  |
| C          | -2.40905600 | 6.37152300  |   |  |
| 1.87842900 |             |             |   |  |
| H          | -1.18606100 | 4.62389300  |   |  |
| 2.21435500 |             |             |   |  |
| C          | -3.30551600 | 7.00714000  |   |  |
| 1.01610800 |             |             |   |  |
| H          | -4.36372500 | 6.87886700  | - |  |
| 0.86020200 |             |             |   |  |
| H          | -2.11938800 | 6.84713600  |   |  |
| 2.81164100 |             |             |   |  |
| H          | -3.71396700 | 7.98058600  |   |  |
| 1.27393800 |             |             |   |  |
| C          | -4.70928800 | -1.98971100 | - |  |
| 0.76844800 |             |             |   |  |
| C          | -5.22730100 | -2.78211800 |   |  |
| 0.26742300 |             |             |   |  |
| C          | -5.49420900 | -1.76593200 | - |  |
| 1.90891000 |             |             |   |  |
| C          | -6.49958700 | -3.34507300 |   |  |
| 0.15990500 |             |             |   |  |
| H          | -4.62662300 | -2.94145100 |   |  |
| 1.15820400 |             |             |   |  |
| C          | -6.76667000 | -2.32957700 | - |  |
| 2.01632900 |             |             |   |  |
| H          | -5.09832400 | -1.14856600 | - |  |
| 2.71060400 |             |             |   |  |
| C          | -7.27186600 | -3.12163200 | - |  |
| 0.98274200 |             |             |   |  |
| H          | -6.89011900 | -3.95277100 |   |  |
| 0.97187700 |             |             |   |  |
| H          | -7.36178600 | -2.15151800 | - |  |
| 2.90809800 |             |             |   |  |
| H          | -8.26276400 | -3.56000500 | - |  |
| 1.06587100 |             |             |   |  |
| C          | 1.86514500  | -4.35064700 | - |  |

|            |            |             |   |
|------------|------------|-------------|---|
| 0.17291500 |            |             |   |
| C          | 1.69676600 | -5.01051700 |   |
| 1.05418900 |            |             |   |
| C          | 2.61962500 | -4.97554300 | - |
| 1.17740800 |            |             |   |
| C          | 2.27476700 | -6.26106000 |   |
| 1.27484700 |            |             |   |
| H          | 1.11250500 | -4.53002000 |   |
| 1.83373100 |            |             |   |
| C          | 3.19751100 | -6.22667800 | - |
| 0.95753400 |            |             |   |
| H          | 2.74462000 | -4.47432400 | - |
| 2.13305400 |            |             |   |
| C          | 3.02765100 | -6.87241200 |   |
| 0.26947500 |            |             |   |
| H          | 2.13881900 | -6.75665100 |   |
| 2.23247000 |            |             |   |
| H          | 3.77542800 | -6.69944500 | - |
| 1.74720200 |            |             |   |
| H          | 3.47750700 | -7.84672600 |   |
| 0.44023700 |            |             |   |
| C          | 4.14479900 | 2.18503900  | - |
| 1.28791100 |            |             |   |
| C          | 4.73754900 | 2.97778200  | - |
| 0.29187200 |            |             |   |
| C          | 4.84046700 | 1.97725100  | - |
| 2.48835200 |            |             |   |
| C          | 5.99363400 | 3.55043900  | - |
| 0.49354300 |            |             |   |
| H          | 4.20118200 | 3.13754000  |   |
| 0.63890700 |            |             |   |
| C          | 6.09668200 | 2.55096000  | - |
| 2.69056300 |            |             |   |
| H          | 4.38749300 | 1.36309600  | - |
| 3.26165700 |            |             |   |
| C          | 6.67687200 | 3.33882300  | - |
| 1.69376400 |            |             |   |
| H          | 6.44069400 | 4.15805300  |   |
| 0.28883800 |            |             |   |
| H          | 6.62033300 | 2.38479200  | - |
| 3.62825900 |            |             |   |
| H          | 7.65528600 | 3.78476400  | - |
| 1.85095600 |            |             |   |
| C          | 1.56058100 | -1.40547700 |   |

|            |             |             |  |
|------------|-------------|-------------|--|
| 2.88194500 |             |             |  |
| C          | 1.26321600  | -0.21426100 |  |
| 2.18498400 |             |             |  |
| C          | 3.39692300  | 0.56805200  |  |
| 2.51944200 |             |             |  |
| C          | 3.78168900  | -0.56252600 |  |
| 3.23810600 |             |             |  |
| C          | 2.82827900  | -1.56736500 |  |
| 3.42368300 |             |             |  |
| H          | 0.80740900  | -2.17953700 |  |
| 2.97126500 |             |             |  |
| H          | 4.11166100  | 1.36838600  |  |
| 2.33278200 |             |             |  |
| H          | 4.79006300  | -0.65410200 |  |
| 3.62936000 |             |             |  |
| H          | 3.07848400  | -2.47876700 |  |
| 3.96077100 |             |             |  |
| N          | 0.01043100  | 0.00974400  |  |
| 1.58812500 |             |             |  |
| N          | 2.17154300  | 0.76180600  |  |
| 2.02062900 |             |             |  |
| N          | -2.21778900 | -0.81787800 |  |
| 2.29135500 |             |             |  |
| N          | -1.11011900 | -0.64846800 |  |
| 2.53350000 |             |             |  |

**6TS3**

|            |             |             |   |
|------------|-------------|-------------|---|
| Mn         | -0.23149800 | 0.10742300  | - |
| 0.32220200 |             |             |   |
| N          | 0.24593800  | 2.05159700  | - |
| 0.49887100 |             |             |   |
| C          | -3.21644100 | -1.61942900 | - |
| 0.72543000 |             |             |   |
| C          | -1.96653600 | 3.03800800  |   |
| 0.03460400 |             |             |   |
| C          | -4.13630600 | 1.77125900  |   |
| 0.01246400 |             |             |   |
| C          | -4.48613700 | 0.48951400  | - |
| 0.28490800 |             |             |   |
| C          | -2.70433200 | 1.85793000  | - |
| 0.10188300 |             |             |   |
| C          | -3.26957100 | -0.23615400 | - |
| 0.53467800 |             |             |   |
| H          | -5.47442600 | 0.05424800  | - |

|            |             |             |   |
|------------|-------------|-------------|---|
| 0.29655400 |             |             |   |
| H          | -4.78517600 | 2.59109200  |   |
| 0.28192800 |             |             |   |
| N          | 1.66861900  | -0.38285600 | - |
| 0.83918300 |             |             |   |
| N          | -2.18892800 | 0.61699400  | - |
| 0.42741300 |             |             |   |
| N          | -0.75337400 | -1.81896500 | - |
| 0.60053900 |             |             |   |
| C          | 2.65461700  | 1.88005400  | - |
| 1.05176000 |             |             |   |
| C          | 1.50835100  | -2.82532200 | - |
| 0.48194100 |             |             |   |
| C          | -0.63228300 | -4.11951100 | - |
| 0.61224100 |             |             |   |
| C          | 0.13088700  | 4.34827000  | - |
| 0.36415800 |             |             |   |
| C          | 3.65326800  | -1.55626800 | - |
| 0.77502200 |             |             |   |
| C          | -1.94357200 | -3.78335800 | - |
| 0.76832800 |             |             |   |
| C          | 1.40130400  | 4.02923600  | - |
| 0.73632900 |             |             |   |
| C          | 3.96259500  | -0.25259600 | - |
| 1.01703000 |             |             |   |
| C          | 0.11224500  | -2.89211700 | - |
| 0.52514100 |             |             |   |
| C          | -0.59331600 | 3.11242200  | - |
| 0.22724900 |             |             |   |
| C          | 2.22071600  | -1.63929000 | - |
| 0.67906600 |             |             |   |
| C          | -2.02248400 | -2.34677200 | - |
| 0.72574200 |             |             |   |
| C          | 1.48196500  | 2.59320000  | - |
| 0.79041700 |             |             |   |
| C          | 2.72643100  | 0.48409200  | - |
| 1.01961200 |             |             |   |
| H          | -2.79006900 | -4.44271700 | - |
| 0.89080800 |             |             |   |
| H          | 2.21720900  | 4.70144600  | - |
| 0.95646400 |             |             |   |
| H          | 4.94204100  | 0.18671800  | - |
| 1.13321900 |             |             |   |
| H          | -0.19276000 | -5.10612200 | - |

|            |             |             |   |
|------------|-------------|-------------|---|
| 0.59448200 |             |             |   |
| H          | -0.29717500 | 5.33043400  | - |
| 0.22849000 |             |             |   |
| H          | 4.32824600  | -2.39180300 | - |
| 0.66520100 |             |             |   |
| C          | -2.67309700 | 4.29788700  |   |
| 0.41240500 |             |             |   |
| C          | -3.61419000 | 4.89047100  | - |
| 0.44339600 |             |             |   |
| C          | -2.38415000 | 4.92022900  |   |
| 1.63669600 |             |             |   |
| C          | -4.25757700 | 6.07429900  | - |
| 0.08005800 |             |             |   |
| H          | -3.83228800 | 4.41918300  | - |
| 1.39766700 |             |             |   |
| C          | -3.02821500 | 6.10369000  |   |
| 1.99976700 |             |             |   |
| H          | -1.65535900 | 4.46447000  |   |
| 2.30094400 |             |             |   |
| C          | -3.96695800 | 6.68334700  |   |
| 1.14300800 |             |             |   |
| H          | -4.98104000 | 6.52355500  | - |
| 0.75518800 |             |             |   |
| H          | -2.79860100 | 6.57062700  |   |
| 2.95374700 |             |             |   |
| H          | -4.46807300 | 7.60510900  |   |
| 1.42593100 |             |             |   |
| C          | -4.50754500 | -2.36653700 | - |
| 0.80655200 |             |             |   |
| C          | -4.93757900 | -3.15016700 |   |
| 0.27519400 |             |             |   |
| C          | -5.31530500 | -2.27849700 | - |
| 1.94886300 |             |             |   |
| C          | -6.14908500 | -3.83937000 |   |
| 0.20939600 |             |             |   |
| H          | -4.31901500 | -3.19890700 |   |
| 1.16674800 |             |             |   |
| C          | -6.52709600 | -2.96881000 | - |
| 2.01356000 |             |             |   |
| H          | -4.98620600 | -1.66817500 | - |
| 2.78551000 |             |             |   |
| C          | -6.94558600 | -3.75180000 | - |
| 0.93534300 |             |             |   |
| H          | -6.47394100 | -4.43932900 |   |

|            |             |             |   |  |
|------------|-------------|-------------|---|--|
| 1.05526600 |             |             |   |  |
| H          | -7.14225200 | -2.89624500 | - |  |
| 2.90651500 |             |             |   |  |
| H          | -7.88909300 | -4.28865600 | - |  |
| 0.98548300 |             |             |   |  |
| C          | 2.26343600  | -4.09339000 | - |  |
| 0.25541300 |             |             |   |  |
| C          | 2.23150100  | -4.69967500 |   |  |
| 1.00921700 |             |             |   |  |
| C          | 3.00108300  | -4.69895900 | - |  |
| 1.28286600 |             |             |   |  |
| C          | 2.92687900  | -5.88687300 |   |  |
| 1.24136100 |             |             |   |  |
| H          | 1.67226500  | -4.22043500 |   |  |
| 1.80694100 |             |             |   |  |
| C          | 3.69564800  | -5.88714700 | - |  |
| 1.04997300 |             |             |   |  |
| H          | 3.02215100  | -4.23427400 | - |  |
| 2.26480600 |             |             |   |  |
| C          | 3.65988500  | -6.48368300 |   |  |
| 0.21265500 |             |             |   |  |
| H          | 2.89905900  | -6.34356600 |   |  |
| 2.22710400 |             |             |   |  |
| H          | 4.26040300  | -6.34853100 | - |  |
| 1.85571300 |             |             |   |  |
| H          | 4.20072700  | -7.40865400 |   |  |
| 0.39379900 |             |             |   |  |
| C          | 3.92458400  | 2.63985400  | - |  |
| 1.24666800 |             |             |   |  |
| C          | 4.47264300  | 3.38017900  | - |  |
| 0.18695700 |             |             |   |  |
| C          | 4.60479700  | 2.60367000  | - |  |
| 2.47242800 |             |             |   |  |
| C          | 5.67268500  | 4.07231400  | - |  |
| 0.35281000 |             |             |   |  |
| H          | 3.94959300  | 3.39948700  |   |  |
| 0.76499800 |             |             |   |  |
| C          | 5.80483400  | 3.29731500  | - |  |
| 2.63803200 |             |             |   |  |
| H          | 4.18529600  | 2.02934800  | - |  |
| 3.29383000 |             |             |   |  |
| C          | 6.34139300  | 4.03330300  | - |  |
| 1.57905700 |             |             |   |  |
| H          | 6.08803000  | 4.63717900  |   |  |

|                         |             |             |   |
|-------------------------|-------------|-------------|---|
| 0.47748100              |             |             |   |
| H                       | 6.31876000  | 3.26455700  | - |
| 3.59501900              |             |             |   |
| H                       | 7.27616400  | 4.57217200  | - |
| 1.70803900              |             |             |   |
| C                       | 1.62900800  | -1.51405800 |   |
| 3.08424900              |             |             |   |
| C                       | 1.26159900  | -0.37614900 |   |
| 2.31537000              |             |             |   |
| C                       | 3.43452000  | 0.41178500  |   |
| 2.40807800              |             |             |   |
| C                       | 3.88836700  | -0.67212500 |   |
| 3.15727600              |             |             |   |
| C                       | 2.94453700  | -1.64730200 |   |
| 3.49998400              |             |             |   |
| H                       | 0.88724900  | -2.26327400 |   |
| 3.32939900              |             |             |   |
| H                       | 4.12769800  | 1.19751400  |   |
| 2.10559700              |             |             |   |
| H                       | 4.92887300  | -0.74950300 |   |
| 3.45600900              |             |             |   |
| H                       | 3.23845900  | -2.51821300 |   |
| 4.08197100              |             |             |   |
| N                       | 0.00951500  | -0.12350200 |   |
| 1.79620900              |             |             |   |
| N                       | 2.17411300  | 0.57717500  |   |
| 2.00149400              |             |             |   |
| N                       | -2.19176300 | -1.15858700 |   |
| 2.26103800              |             |             |   |
| N                       | -1.05895400 | -1.22987600 |   |
| 2.43687700              |             |             |   |
| <b><sup>2</sup>INT4</b> |             |             |   |
| Mn                      | 0.26134100  | 0.00942600  | - |
| 0.16837700              |             |             |   |
| N                       | 0.85326700  | -1.89336800 | - |
| 0.49867500              |             |             |   |
| C                       | 1.93951000  | 3.02578300  | - |
| 0.10865800              |             |             |   |
| C                       | 3.31156500  | -1.64241800 | - |
| 0.32460700              |             |             |   |
| C                       | 4.51017900  | 0.52191600  |   |
| 0.07838800              |             |             |   |
| C                       | 4.12483700  | 1.82335400  |   |

|            |             |             |   |  |
|------------|-------------|-------------|---|--|
| 0.16436400 |             |             |   |  |
| C          | 3.32205200  | -0.25055200 | - |  |
| 0.18908100 |             |             |   |  |
| C          | 2.70160900  | 1.85459800  | - |  |
| 0.06632600 |             |             |   |  |
| H          | 4.74083000  | 2.68697500  |   |  |
| 0.36695900 |             |             |   |  |
| H          | 5.50233800  | 0.11249800  |   |  |
| 0.19865100 |             |             |   |  |
| N          | -1.62139600 | -0.53400100 | - |  |
| 0.71186900 |             |             |   |  |
| N          | 2.22053300  | 0.57618600  | - |  |
| 0.26120200 |             |             |   |  |
| N          | -0.25837800 | 1.93645800  | - |  |
| 0.49208400 |             |             |   |  |
| C          | -1.36734300 | -2.98394500 | - |  |
| 0.55535900 |             |             |   |  |
| C          | -2.70080600 | 1.68679400  | - |  |
| 0.83254300 |             |             |   |  |
| C          | -1.49089900 | 3.87725200  | - |  |
| 0.75648900 |             |             |   |  |
| C          | 2.11769700  | -3.83070900 | - |  |
| 0.58283500 |             |             |   |  |
| C          | -3.93489800 | -0.49293300 | - |  |
| 0.82162700 |             |             |   |  |
| C          | -0.20110400 | 4.25003000  | - |  |
| 0.53453000 |             |             |   |  |
| C          | 0.81072100  | -4.20557800 | - |  |
| 0.60184900 |             |             |   |  |
| C          | -3.56308600 | -1.79725000 | - |  |
| 0.71964800 |             |             |   |  |
| C          | -1.52808400 | 2.43842400  | - |  |
| 0.70786900 |             |             |   |  |
| C          | 2.14166400  | -2.39195900 | - |  |
| 0.47753500 |             |             |   |  |
| C          | -2.72509100 | 0.29117000  | - |  |
| 0.80907700 |             |             |   |  |
| C          | 0.56324900  | 3.04199300  | - |  |
| 0.35704500 |             |             |   |  |
| C          | 0.02811800  | -2.99799200 | - |  |
| 0.54503000 |             |             |   |  |
| C          | -2.12474400 | -1.81868800 | - |  |
| 0.65940300 |             |             |   |  |
| H          | 0.20777900  | 5.24935800  | - |  |



|            |             |             |   |  |
|------------|-------------|-------------|---|--|
| 0.51245500 |             |             |   |  |
| H          | 0.40052500  | -5.20276900 | - |  |
| 0.66960000 |             |             |   |  |
| H          | -4.19639900 | -2.67149200 | - |  |
| 0.68383900 |             |             |   |  |
| H          | -2.34336200 | 4.51182400  | - |  |
| 0.94916400 |             |             |   |  |
| H          | 2.99217500  | -4.46240700 | - |  |
| 0.63161600 |             |             |   |  |
| H          | -4.93430200 | -0.08805800 | - |  |
| 0.88111800 |             |             |   |  |
| C          | 4.61894600  | -2.36498700 | - |  |
| 0.27108000 |             |             |   |  |
| C          | 5.56149300  | -2.20885300 | - |  |
| 1.29859000 |             |             |   |  |
| C          | 4.93026300  | -3.20403700 | - |  |
| 0.80976800 |             |             |   |  |
| C          | 6.78509200  | -2.87824700 | - |  |
| 1.24877700 |             |             |   |  |
| H          | 5.32571200  | -1.55953700 | - |  |
| 2.13715900 |             |             |   |  |
| C          | 6.15408300  | -3.87271000 | - |  |
| 0.86038600 |             |             |   |  |
| H          | 4.20571500  | -3.32370700 | - |  |
| 1.61023100 |             |             |   |  |
| C          | 7.08462900  | -3.71217900 | - |  |
| 0.16903100 |             |             |   |  |
| H          | 7.50260300  | -2.75045200 | - |  |
| 2.05499100 |             |             |   |  |
| H          | 6.38199500  | -4.51551800 | - |  |
| 1.70650900 |             |             |   |  |
| H          | 8.03753700  | -4.23307100 | - |  |
| 0.12961100 |             |             |   |  |
| C          | 2.63187400  | 4.33498700  | - |  |
| 0.09250200 |             |             |   |  |
| C          | 2.36190200  | 5.11437000  | - |  |
| 1.22768100 |             |             |   |  |
| C          | 3.55684800  | 4.81164500  | - |  |
| 0.84888100 |             |             |   |  |
| C          | 3.00307700  | 6.33902200  | - |  |
| 1.41868700 |             |             |   |  |
| H          | 1.64738400  | 4.74929000  | - |  |
| 1.96006300 |             |             |   |  |
| C          | 4.19763800  | 6.03675800  | - |  |

|            |             |             |   |
|------------|-------------|-------------|---|
| 0.65900400 |             |             |   |
| H          | 3.76671600  | 4.21432400  | - |
| 1.73170900 |             |             |   |
| C          | 3.92281400  | 6.80371400  |   |
| 0.47565000 |             |             |   |
| H          | 2.78673100  | 6.92804300  |   |
| 2.30600800 |             |             |   |
| H          | 4.90825300  | 6.39370600  | - |
| 1.39976100 |             |             |   |
| H          | 4.42203900  | 7.75748200  |   |
| 0.62386000 |             |             |   |
| C          | -4.00054900 | 2.41388700  | - |
| 0.95170600 |             |             |   |
| C          | -4.50216500 | 3.15224600  |   |
| 0.13099400 |             |             |   |
| C          | -4.74676200 | 2.36306600  | - |
| 2.13825300 |             |             |   |
| C          | -5.71974700 | 3.82584100  |   |
| 0.02928500 |             |             |   |
| H          | -3.92989000 | 3.18575500  |   |
| 1.05344100 |             |             |   |
| C          | -5.96480300 | 3.03696100  | - |
| 2.24099800 |             |             |   |
| H          | -4.36306500 | 1.79209300  | - |
| 2.97912700 |             |             |   |
| C          | -6.45437000 | 3.77036000  | - |
| 1.15773100 |             |             |   |
| H          | -6.09688100 | 4.39020600  |   |
| 0.87813000 |             |             |   |
| H          | -6.52926300 | 2.99164100  | - |
| 3.16857300 |             |             |   |
| H          | -7.40274200 | 4.29481400  | - |
| 1.23770800 |             |             |   |
| C          | -2.08308400 | -4.28502300 | - |
| 0.38972800 |             |             |   |
| C          | -2.13076500 | -4.87375100 |   |
| 0.88303300 |             |             |   |
| C          | -2.71272500 | -4.92563900 | - |
| 1.46467600 |             |             |   |
| C          | -2.79750800 | -6.08454400 |   |
| 1.07432900 |             |             |   |
| H          | -1.64876200 | -4.36196900 |   |
| 1.71165300 |             |             |   |
| C          | -3.37850000 | -6.13820600 | - |

|                         |             |             |   |
|-------------------------|-------------|-------------|---|
| 1.27190200              |             |             |   |
| H                       | -2.67533900 | -4.46983200 | - |
| 2.45039000              |             |             |   |
| C                       | -3.42179500 | -6.71974900 | - |
| 0.00270800              |             |             |   |
| H                       | -2.83139700 | -6.53137900 |   |
| 2.06456800              |             |             |   |
| H                       | -3.86047100 | -6.62895000 | - |
| 2.11340000              |             |             |   |
| H                       | -3.93989900 | -7.66338600 |   |
| 0.14647400              |             |             |   |
| C                       | -1.88213700 | 1.05203300  |   |
| 2.48387500              |             |             |   |
| C                       | -1.19114900 | -0.13523400 |   |
| 2.15245200              |             |             |   |
| C                       | -2.84308500 | -1.43668700 |   |
| 3.06179800              |             |             |   |
| C                       | -3.61129300 | -0.32977000 |   |
| 3.42284700              |             |             |   |
| C                       | -3.10730100 | 0.94077800  |   |
| 3.12606500              |             |             |   |
| H                       | -1.45367100 | 2.01092800  |   |
| 2.21408100              |             |             |   |
| H                       | -3.19994100 | -2.44452900 |   |
| 3.26961700              |             |             |   |
| H                       | -4.56887100 | -0.45973000 |   |
| 3.91673300              |             |             |   |
| H                       | -3.66990400 | 1.83425400  |   |
| 3.38519100              |             |             |   |
| N                       | 0.04995700  | -0.05292000 |   |
| 1.53847100              |             |             |   |
| N                       | -1.65742500 | -1.36436800 |   |
| 2.44683600              |             |             |   |
| <b><sup>4</sup>INT4</b> |             |             |   |
| Mn                      | -0.28590900 | -0.01445300 |   |
| 0.22575600              |             |             |   |
| N                       | -2.09725300 | 0.91537300  |   |
| 0.29348400              |             |             |   |
| C                       | 0.72452900  | -3.26380000 |   |
| 0.38072900              |             |             |   |
| C                       | -3.60896100 | -1.04823700 |   |
| 0.37690800              |             |             |   |
| C                       | -2.86086700 | -3.44551900 |   |

|            |             |             |   |
|------------|-------------|-------------|---|
| 0.42102900 |             |             |   |
| C          | -1.65251400 | -4.06261600 |   |
| 0.34121400 |             |             |   |
| C          | -2.60980500 | -2.02319100 |   |
| 0.43410100 |             |             |   |
| C          | -0.64987200 | -3.02692200 |   |
| 0.37038100 |             |             |   |
| H          | -1.44431000 | -5.12140100 |   |
| 0.29520800 |             |             |   |
| H          | -3.83968300 | -3.90053900 |   |
| 0.45143500 |             |             |   |
| N          | 0.59762200  | 1.77736700  |   |
| 0.53864500 |             |             |   |
| N          | -1.25126100 | -1.78832400 |   |
| 0.43342600 |             |             |   |
| N          | 1.42543000  | -0.91736800 |   |
| 0.75765300 |             |             |   |
| C          | -1.33024700 | 3.25593100  |   |
| 0.04667300 |             |             |   |
| C          | 2.90957100  | 1.04802100  |   |
| 1.02008400 |             |             |   |
| C          | 3.68457600  | -1.33156000 |   |
| 1.00263700 |             |             |   |
| C          | -4.35577500 | 1.31450900  |   |
| 0.01685600 |             |             |   |
| C          | 2.17717700  | 3.43858600  |   |
| 0.81393600 |             |             |   |
| C          | 3.08022800  | -2.52791000 |   |
| 0.77184200 |             |             |   |
| C          | -3.71777100 | 2.50673100  | - |
| 0.13309500 |             |             |   |
| C          | 1.00452200  | 4.05077800  |   |
| 0.49609400 |             |             |   |
| C          | 2.65703300  | -0.32325000 |   |
| 0.96298800 |             |             |   |
| C          | -3.34268600 | 0.32108500  |   |
| 0.26697900 |             |             |   |
| C          | 1.92623300  | 2.01974900  |   |
| 0.81527300 |             |             |   |
| C          | 1.67467400  | -2.26785000 |   |
| 0.60961400 |             |             |   |
| C          | -2.31180600 | 2.25994700  |   |
| 0.05893000 |             |             |   |
| C          | 0.01801400  | 3.01323100  |   |

|            |             |             |             |
|------------|-------------|-------------|-------------|
| 0.32379600 |             |             |             |
| H          |             | 3.53284000  | -3.50710900 |
| 0.72023000 |             |             |             |
| H          | -4.15334700 | 3.47060900  | -           |
| 0.35043000 |             |             |             |
| H          | 0.80615600  | 5.10913300  |             |
| 0.41313900 |             |             |             |
| H          | 4.73365900  | -1.13363900 |             |
| 1.16548000 |             |             |             |
| H          | -5.41356400 | 1.11133100  | -           |
| 0.06132200 |             |             |             |
| H          | 3.13047500  | 3.89581100  |             |
| 1.03455400 |             |             |             |
| N          | 0.03153900  | -0.07332500 | -           |
| 1.50795300 |             |             |             |
| C          | 1.27629900  | -0.08825300 | -           |
| 2.08503000 |             |             |             |
| C          | 1.90599500  | 1.13415200  | -           |
| 2.43854300 |             |             |             |
| C          | 3.06099000  | -1.27832200 | -           |
| 2.93909400 |             |             |             |
| C          | 3.14639400  | 1.11040900  | -           |
| 3.06069400 |             |             |             |
| H          | 1.40228700  | 2.06471900  | -           |
| 2.19983800 |             |             |             |
| C          | 3.75182000  | -0.12362600 | -           |
| 3.31731000 |             |             |             |
| H          | 3.50224200  | -2.25861900 | -           |
| 3.12061400 |             |             |             |
| H          | 3.63923400  | 2.03953100  | -           |
| 3.33882200 |             |             |             |
| H          | 4.72450500  | -0.19324300 | -           |
| 3.79445100 |             |             |             |
| N          | 1.86487400  | -1.28565400 | -           |
| 2.34832400 |             |             |             |
| C          | -1.74169800 | 4.66557200  | -           |
| 0.23101200 |             |             |             |
| C          | -1.32340900 | 5.30245200  | -           |
| 1.40908900 |             |             |             |
| C          | -2.53622700 | 5.37985500  |             |
| 0.67835100 |             |             |             |
| C          | -1.69488700 | 6.62122700  | -           |
| 1.67420800 |             |             |             |
| H          | -0.70848600 | 4.75271800  | -           |

|            |             |             |   |
|------------|-------------|-------------|---|
| 2.11615600 |             |             |   |
| C          | -2.90744900 | 6.69891400  |   |
| 0.41385500 |             |             |   |
| H          | -2.85713300 | 4.89335200  |   |
| 1.59520500 |             |             |   |
| C          | -2.48817100 | 7.32291800  | - |
| 0.76346500 |             |             |   |
| H          | -1.36737500 | 7.09889000  | - |
| 2.59375800 |             |             |   |
| H          | -3.52004800 | 7.24023800  |   |
| 1.12991900 |             |             |   |
| H          | -2.77737700 | 8.34991800  | - |
| 0.96950300 |             |             |   |
| C          | 4.31921300  | 1.49591900  |   |
| 1.23335400 |             |             |   |
| C          | 4.93603100  | 1.35106300  |   |
| 2.48401200 |             |             |   |
| C          | 5.05014800  | 2.05544700  |   |
| 0.17470500 |             |             |   |
| C          | 6.25606600  | 1.76338000  |   |
| 2.67488400 |             |             |   |
| H          | 4.37314600  | 0.91499600  |   |
| 3.30474100 |             |             |   |
| C          | 6.36964000  | 2.46697600  |   |
| 0.36582900 |             |             |   |
| H          | 4.57605600  | 2.14941500  | - |
| 0.79770800 |             |             |   |
| C          | 6.97546100  | 2.32327000  |   |
| 1.61658800 |             |             |   |
| H          | 6.72093500  | 1.64932900  |   |
| 3.65055600 |             |             |   |
| H          | 6.92659700  | 2.89476500  | - |
| 0.46368900 |             |             |   |
| H          | 8.00314700  | 2.64379200  |   |
| 1.76514500 |             |             |   |
| C          | -5.03824900 | -1.48564300 |   |
| 0.37240900 |             |             |   |
| C          | -5.87334500 | -1.18764900 |   |
| 1.45959700 |             |             |   |
| C          | -5.57303500 | -2.18591400 | - |
| 0.71962800 |             |             |   |
| C          | -7.21101500 | -1.58576700 |   |
| 1.45815400 |             |             |   |
| H          | -5.46461100 | -0.64267400 |   |

|                         |             |             |   |
|-------------------------|-------------|-------------|---|
| 2.30602300              |             |             |   |
| C                       | -6.91067400 | -2.58370900 | - |
| 0.72135000              |             |             |   |
| H                       | -4.93217900 | -2.41096000 | - |
| 1.56736500              |             |             |   |
| C                       | -7.73300500 | -2.28548300 |   |
| 0.36780400              |             |             |   |
| H                       | -7.84404400 | -1.35147600 |   |
| 2.30989200              |             |             |   |
| H                       | -7.31125200 | -3.12194300 | - |
| 1.57623600              |             |             |   |
| H                       | -8.77461700 | -2.59516200 |   |
| 0.36609900              |             |             |   |
| C                       | 1.22284500  | -4.64034400 |   |
| 0.08391800              |             |             |   |
| C                       | 1.14487600  | -5.68273800 |   |
| 1.01614800              |             |             |   |
| C                       | 1.79216700  | -4.88293800 | - |
| 1.17593300              |             |             |   |
| C                       | 1.62692000  | -6.95337300 |   |
| 0.69366300              |             |             |   |
| H                       | 0.70986800  | -5.49172200 |   |
| 1.99353300              |             |             |   |
| C                       | 2.27223100  | -6.15348700 | - |
| 1.49528900              |             |             |   |
| H                       | 1.83979700  | -4.06302100 | - |
| 1.88831400              |             |             |   |
| C                       | 2.19099500  | -7.19070200 | - |
| 0.56187900              |             |             |   |
| H                       | 1.56512600  | -7.75550500 |   |
| 1.42442300              |             |             |   |
| H                       | 2.70790700  | -6.33489800 | - |
| 2.47440500              |             |             |   |
| H                       | 2.56603800  | -8.17970600 | - |
| 0.81167100              |             |             |   |
| <b><sup>6</sup>INT4</b> |             |             |   |
| Mn                      | 0.33122600  | -0.01804200 | - |
| 0.28774000              |             |             |   |
| N                       | 1.22003700  | -1.81843100 | - |
| 0.41859000              |             |             |   |
| C                       | 1.45057000  | 3.21796800  |   |
| 0.00663300              |             |             |   |
| C                       | 3.60487100  | -1.14957100 | - |

|            |             |             |   |  |
|------------|-------------|-------------|---|--|
| 0.40072200 |             |             |   |  |
| C          | 4.42381600  | 1.19068800  | - |  |
| 0.04392400 |             |             |   |  |
| C          | 3.82138100  | 2.39859100  |   |  |
| 0.13326100 |             |             |   |  |
| C          | 3.38180800  | 0.22812300  | - |  |
| 0.29034000 |             |             |   |  |
| C          | 2.40646000  | 2.19793500  | - |  |
| 0.04113200 |             |             |   |  |
| H          | 4.28760500  | 3.34504000  |   |  |
| 0.36312600 |             |             |   |  |
| H          | 5.47622500  | 0.95682600  |   |  |
| 0.01905100 |             |             |   |  |
| N          | -1.43409700 | -0.87814400 | - |  |
| 0.78611500 |             |             |   |  |
| N          | 2.15486800  | 0.86225700  | - |  |
| 0.29181900 |             |             |   |  |
| N          | -0.51932900 | 1.79703500  | - |  |
| 0.50296200 |             |             |   |  |
| C          | -0.80992700 | -3.23301300 | - |  |
| 0.35876200 |             |             |   |  |
| C          | -2.84551800 | 1.13619200  | - |  |
| 1.05871000 |             |             |   |  |
| C          | -2.05102000 | 3.49617800  | - |  |
| 0.77600000 |             |             |   |  |
| C          | 2.77309200  | -3.51977500 | - |  |
| 0.39037600 |             |             |   |  |
| C          | -3.69884200 | -1.21912500 | - |  |
| 1.06883700 |             |             |   |  |
| C          | -0.86632600 | 4.07332100  | - |  |
| 0.42666700 |             |             |   |  |
| C          | 1.54246100  | -4.09577900 | - |  |
| 0.28721700 |             |             |   |  |
| C          | -3.13747700 | -2.43222900 | - |  |
| 0.81623900 |             |             |   |  |
| C          | -1.84022800 | 2.07502100  | - |  |
| 0.80240300 |             |             |   |  |
| C          | 2.57375500  | -2.09461500 | - |  |
| 0.42900500 |             |             |   |  |
| C          | -2.63887400 | -0.24430500 | - |  |
| 1.01342800 |             |             |   |  |
| C          | 0.09171900  | 3.01303800  | - |  |
| 0.26420700 |             |             |   |  |
| C          | 0.57290200  | -3.03532400 | - |  |



|            |             |             |   |  |
|------------|-------------|-------------|---|--|
| 0.33451900 |             |             |   |  |
| C          | -1.72665400 | -2.21483300 | - |  |
| 0.62944300 |             |             |   |  |
| H          | -0.64582500 | 5.12488200  | - |  |
| 0.31724500 |             |             |   |  |
| H          | 1.30219200  | -5.14622900 | - |  |
| 0.21422500 |             |             |   |  |
| H          | -3.62328400 | -3.39483000 | - |  |
| 0.75433100 |             |             |   |  |
| H          | -2.98859700 | 3.98375500  | - |  |
| 0.99843300 |             |             |   |  |
| H          | 3.73487000  | -4.00994400 | - |  |
| 0.41687200 |             |             |   |  |
| H          | -4.73894200 | -0.98724700 | - |  |
| 1.24329200 |             |             |   |  |
| C          | 5.02002900  | -1.62982900 | - |  |
| 0.41623800 |             |             |   |  |
| C          | 5.84589600  | -1.36111600 | - |  |
| 1.51810200 |             |             |   |  |
| C          | 5.55233800  | -2.33894500 |   |  |
| 0.67148200 |             |             |   |  |
| C          | 7.17164400  | -1.79693100 | - |  |
| 1.53546300 |             |             |   |  |
| H          | 5.43939200  | -0.80931700 | - |  |
| 2.36121100 |             |             |   |  |
| C          | 6.87782100  | -2.77513900 |   |  |
| 0.65393600 |             |             |   |  |
| H          | 4.91995300  | -2.53949600 |   |  |
| 1.53166700 |             |             |   |  |
| C          | 7.69070500  | -2.50603600 | - |  |
| 0.44980000 |             |             |   |  |
| H          | 7.79748100  | -1.58487200 | - |  |
| 2.39822900 |             |             |   |  |
| H          | 7.27667300  | -3.31975600 |   |  |
| 1.50553200 |             |             |   |  |
| H          | 8.72294300  | -2.84528400 | - |  |
| 0.46285200 |             |             |   |  |
| C          | 1.89720700  | 4.61015800  |   |  |
| 0.31256600 |             |             |   |  |
| C          | 1.48654500  | 5.23526800  |   |  |
| 1.49996000 |             |             |   |  |
| C          | 2.71608100  | 5.32117100  | - |  |
| 0.57789700 |             |             |   |  |
| C          | 1.88987300  | 6.53870900  |   |  |

|            |             |             |   |
|------------|-------------|-------------|---|
| 1.79254700 |             |             |   |
| H          | 0.85310500  | 4.68818900  |   |
| 2.19257700 |             |             |   |
| C          | 3.11949600  | 6.62469200  | - |
| 0.28530600 |             |             |   |
| H          | 3.02928200  | 4.84519700  | - |
| 1.50291600 |             |             |   |
| C          | 2.70786400  | 7.23668900  |   |
| 0.90097100 |             |             |   |
| H          | 1.56802100  | 7.00700000  |   |
| 2.71882100 |             |             |   |
| H          | 3.75052200  | 7.16372500  | - |
| 0.98691300 |             |             |   |
| H          | 3.02190400  | 8.25171300  |   |
| 1.12867600 |             |             |   |
| C          | -4.23425500 | 1.62924700  | - |
| 1.30627600 |             |             |   |
| C          | -4.98159800 | 2.19120900  | - |
| 0.26049800 |             |             |   |
| C          | -4.81576000 | 1.51920800  | - |
| 2.57725200 |             |             |   |
| C          | -6.28325900 | 2.64063800  | - |
| 0.48544100 |             |             |   |
| H          | -4.53636300 | 2.25270400  |   |
| 0.72759500 |             |             |   |
| C          | -6.11789800 | 1.96986700  | - |
| 2.80137200 |             |             |   |
| H          | -4.24002300 | 1.08020400  | - |
| 3.38751600 |             |             |   |
| C          | -6.85393500 | 2.53280900  | - |
| 1.75621300 |             |             |   |
| H          | -6.85435800 | 3.06890200  |   |
| 0.33409500 |             |             |   |
| H          | -6.55576400 | 1.88285400  | - |
| 3.79219800 |             |             |   |
| H          | -7.86789500 | 2.88280000  | - |
| 1.93041400 |             |             |   |
| C          | -1.35419600 | -4.58322100 | - |
| 0.02535600 |             |             |   |
| C          | -1.95026500 | -4.76080000 |   |
| 1.23346100 |             |             |   |
| C          | -1.29471900 | -5.65981600 | - |
| 0.91931100 |             |             |   |
| C          | -2.47523000 | -6.00388200 |   |

|                        |             |             |   |
|------------------------|-------------|-------------|---|
| 1.58853300             |             |             |   |
| H                      | -1.98083400 | -3.91354200 |   |
| 1.91463000             |             |             |   |
| C                      | -1.82228500 | -6.90224700 | - |
| 0.56004600             |             |             |   |
| H                      | -0.84009500 | -5.51755900 | - |
| 1.89618200             |             |             |   |
| C                      | -2.41290800 | -7.07595700 |   |
| 0.69372600             |             |             |   |
| H                      | -2.93157600 | -6.13616500 |   |
| 2.56605400             |             |             |   |
| H                      | -1.77542500 | -7.73163000 | - |
| 1.26088400             |             |             |   |
| H                      | -2.82349800 | -8.04300900 |   |
| 0.97200900             |             |             |   |
| C                      | -2.01142300 | 1.14817100  |   |
| 2.57100400             |             |             |   |
| C                      | -1.37318000 | -0.08485600 |   |
| 2.22823900             |             |             |   |
| C                      | -3.31566000 | -1.24217100 |   |
| 2.70579300             |             |             |   |
| C                      | -4.02464900 | -0.09024800 |   |
| 3.03993100             |             |             |   |
| C                      | -3.33415500 | 1.13043100  |   |
| 2.97161400             |             |             |   |
| H                      | -1.44753300 | 2.07237300  |   |
| 2.49399400             |             |             |   |
| H                      | -3.80903300 | -2.21431300 |   |
| 2.74712600             |             |             |   |
| H                      | -5.06429400 | -0.14386200 |   |
| 3.34606000             |             |             |   |
| H                      | -3.83242500 | 2.06183000  |   |
| 3.23481500             |             |             |   |
| N                      | -0.09673200 | -0.07710600 |   |
| 1.79210400             |             |             |   |
| N                      | -2.03812000 | -1.27321700 |   |
| 2.31287600             |             |             |   |
| <b><sup>2</sup>TS4</b> |             |             |   |
| Mn                     | 0.58353700  | 0.25147300  |   |
| 0.56075000             |             |             |   |
| N                      | 0.92242700  | 2.25219500  |   |
| 0.56457000             |             |             |   |
| C                      | -2.09927300 | -1.72779200 |   |

|            |             |             |   |
|------------|-------------|-------------|---|
| 1.34004300 |             |             |   |
| C          | -1.33802700 | 3.08010400  |   |
| 1.12034500 |             |             |   |
| C          | -3.29925500 | 1.63530900  |   |
| 1.70406800 |             |             |   |
| C          | -3.52488400 | 0.29303800  |   |
| 1.70332400 |             |             |   |
| C          | -1.91437200 | 1.82821400  |   |
| 1.34920900 |             |             |   |
| C          | -2.26990900 | -0.34181000 |   |
| 1.39117500 |             |             |   |
| H          | -4.44558200 | -0.23218200 |   |
| 1.91152800 |             |             |   |
| H          | -4.00046300 | 2.42981200  |   |
| 1.91421600 |             |             |   |
| N          | 2.59879200  | -0.04623300 |   |
| 0.52150600 |             |             |   |
| N          | -1.28651500 | 0.60610900  |   |
| 1.20925500 |             |             |   |
| N          | 0.35781400  | -1.68936300 |   |
| 1.12090600 |             |             |   |
| C          | 3.30794200  | 2.24588300  | - |
| 0.09890900 |             |             |   |
| C          | 2.68452500  | -2.49759100 |   |
| 0.86647200 |             |             |   |
| C          | 0.70728000  | -3.96736700 |   |
| 1.33441900 |             |             |   |
| C          | 0.58652600  | 4.53835700  |   |
| 0.43766600 |             |             |   |
| C          | 4.63200100  | -1.08799500 |   |
| 0.15375900 |             |             |   |
| C          | -0.63576300 | -3.76149300 |   |
| 1.39992500 |             |             |   |
| C          | 1.87905600  | 4.30218600  |   |
| 0.08001200 |             |             |   |
| C          | 4.79799000  | 0.22863100  | - |
| 0.14646100 |             |             |   |
| C          | 1.32130900  | -2.67963200 |   |
| 1.11804500 |             |             |   |
| C          | -0.00507100 | 3.25963600  |   |
| 0.73992800 |             |             |   |
| C          | 3.25879800  | -1.25686900 |   |
| 0.56252800 |             |             |   |
| C          | -0.84735400 | -2.34188800 |   |

|            |             |             |   |
|------------|-------------|-------------|---|
| 1.28426500 |             |             |   |
| C          | 2.08454000  | 2.87661500  |   |
| 0.15872400 |             |             |   |
| C          | 3.53304300  | 0.87871000  |   |
| 0.09368900 |             |             |   |
| H          | -1.41647700 | -4.49608100 |   |
| 1.53108300 |             |             |   |
| H          | 2.63314500  | 5.02329000  | - |
| 0.19930800 |             |             |   |
| H          | 5.69101500  | 0.71978900  | - |
| 0.50373400 |             |             |   |
| H          | 1.23871100  | -4.90448000 |   |
| 1.40722600 |             |             |   |
| H          | 0.07500700  | 5.48793400  |   |
| 0.49810300 |             |             |   |
| H          | 5.36211800  | -1.88109000 |   |
| 0.08758200 |             |             |   |
| N          | 0.30473300  | 0.08013900  | - |
| 1.20513200 |             |             |   |
| C          | 0.10694500  | -1.19119800 | - |
| 1.74233200 |             |             |   |
| C          | 1.24970700  | -1.83969300 | - |
| 2.26963200 |             |             |   |
| C          | -1.22791600 | -2.97464500 | - |
| 2.31689200 |             |             |   |
| C          | 1.10654300  | -3.10730000 | - |
| 2.81628600 |             |             |   |
| H          | 2.20997000  | -1.33852600 | - |
| 2.22179000 |             |             |   |
| C          | -0.16125900 | -3.69974000 | - |
| 2.84520600 |             |             |   |
| H          | -2.23559800 | -3.38879700 | - |
| 2.31800300 |             |             |   |
| H          | 1.97198200  | -3.62556100 | - |
| 3.22227600 |             |             |   |
| H          | -0.31799600 | -4.68862200 | - |
| 3.26463500 |             |             |   |
| N          | -1.11292000 | -1.75879800 | - |
| 1.77103600 |             |             |   |
| C          | -5.78006000 | 0.12425300  | - |
| 1.73158400 |             |             |   |
| C          | -5.94499300 | -0.84963800 | - |
| 2.72092500 |             |             |   |
| C          | -4.86024100 | -1.20355400 | - |

|            |             |             |   |
|------------|-------------|-------------|---|
| 3.53285400 |             |             |   |
| C          | -3.62171400 | -0.59586700 | - |
| 3.35795900 |             |             |   |
| C          | -3.44048100 | 0.38248300  | - |
| 2.35298600 |             |             |   |
| C          | -4.54562700 | 0.74070500  | - |
| 1.54913400 |             |             |   |
| H          | -6.61599300 | 0.40001500  | - |
| 1.09450200 |             |             |   |
| H          | -6.91031100 | -1.32886400 | - |
| 2.86018300 |             |             |   |
| H          | -4.98190400 | -1.96123000 | - |
| 4.30251400 |             |             |   |
| H          | -2.77258400 | -0.88371800 | - |
| 3.96738500 |             |             |   |
| H          | -4.41087800 | 1.48213900  | - |
| 0.77078700 |             |             |   |
| C          | -2.18166800 | 0.99351500  | - |
| 2.15481300 |             |             |   |
| C          | -1.02982600 | 1.39540100  | - |
| 1.93275700 |             |             |   |
| H          | -0.32144200 | 2.19712600  | - |
| 1.94359800 |             |             |   |
| C          | -2.21888300 | 4.28506300  |   |
| 1.20012300 |             |             |   |
| C          | -2.09571500 | 5.20809100  |   |
| 2.24764100 |             |             |   |
| C          | -3.18432400 | 4.50895700  |   |
| 0.20622100 |             |             |   |
| C          | -2.92499600 | 6.33007300  |   |
| 2.30437400 |             |             |   |
| H          | -1.34823200 | 5.03822100  |   |
| 3.01771000 |             |             |   |
| C          | -4.01268000 | 5.63034000  |   |
| 0.26278400 |             |             |   |
| H          | -3.26899200 | 3.79983800  | - |
| 0.61307200 |             |             |   |
| C          | -3.88567700 | 6.54313900  |   |
| 1.31309100 |             |             |   |
| H          | -2.82213400 | 7.03562200  |   |
| 3.12460400 |             |             |   |
| H          | -4.75386700 | 5.79317900  | - |
| 0.51524800 |             |             |   |
| H          | -4.53091600 | 7.41642700  |   |

|            |            |             |   |
|------------|------------|-------------|---|
| 1.35794200 |            |             |   |
| C          | 4.44196600 | 3.09228500  | - |
| 0.58094500 |            |             |   |
| C          | 4.39856900 | 3.67613200  | - |
| 1.85616000 |            |             |   |
| C          | 5.56295400 | 3.32554100  |   |
| 0.23003100 |            |             |   |
| C          | 5.45147000 | 4.47128900  | - |
| 2.31081000 |            |             |   |
| H          | 3.53251800 | 3.49898800  | - |
| 2.48777600 |            |             |   |
| C          | 6.61637600 | 4.12046900  | - |
| 0.22401900 |            |             |   |
| H          | 5.59979500 | 2.87977000  |   |
| 1.22011300 |            |             |   |
| C          | 6.56368100 | 4.69541800  | - |
| 1.49596600 |            |             |   |
| H          | 5.40408200 | 4.91267300  | - |
| 3.30281300 |            |             |   |
| H          | 7.47583500 | 4.29437900  |   |
| 0.41805500 |            |             |   |
| H          | 7.38368200 | 5.31467600  | - |
| 1.84954400 |            |             |   |
| C          | 3.57078100 | -3.70127100 |   |
| 0.84893700 |            |             |   |
| C          | 4.57322700 | -3.86739600 |   |
| 1.81592600 |            |             |   |
| C          | 3.42352800 | -4.67927200 | - |
| 0.14706400 |            |             |   |
| C          | 5.40763900 | -4.98609300 |   |
| 1.79006800 |            |             |   |
| H          | 4.69220100 | -3.11242100 |   |
| 2.58816200 |            |             |   |
| C          | 4.25724100 | -5.79780700 | - |
| 0.17280800 |            |             |   |
| H          | 2.64878700 | -4.55088400 | - |
| 0.89733900 |            |             |   |
| C          | 5.25196300 | -5.95447900 |   |
| 0.79560800 |            |             |   |
| H          | 6.17676500 | -5.10246000 |   |
| 2.54905500 |            |             |   |
| H          | 4.13250800 | -6.54528200 | - |
| 0.95202700 |            |             |   |
| H          | 5.90151500 | -6.82546800 |   |

|                        |             |             |   |
|------------------------|-------------|-------------|---|
| 0.77539400             |             |             |   |
| C                      | -3.32828300 | -2.57401100 |   |
| 1.28978200             |             |             |   |
| C                      | -3.73407500 | -3.37770700 |   |
| 2.36362000             |             |             |   |
| C                      | -4.10298600 | -2.55193300 |   |
| 0.11865400             |             |             |   |
| C                      | -4.89320500 | -4.15106600 |   |
| 2.26802800             |             |             |   |
| H                      | -3.14056300 | -3.38844000 |   |
| 3.27388400             |             |             |   |
| C                      | -5.26120200 | -3.32383000 |   |
| 0.02657800             |             |             |   |
| H                      | -3.78410800 | -1.92962700 | - |
| 0.71112100             |             |             |   |
| C                      | -5.65874600 | -4.12597800 |   |
| 1.09957900             |             |             |   |
| H                      | -5.20078800 | -4.76767800 |   |
| 3.10862200             |             |             |   |
| H                      | -5.85058500 | -3.29043800 | - |
| 0.88556600             |             |             |   |
| H                      | -6.56176300 | -4.72672800 |   |
| 1.02785400             |             |             |   |
| <b><sup>4</sup>TS4</b> |             |             |   |
| Mn                     | 0.57128700  | 0.27661100  |   |
| 0.65435200             |             |             |   |
| N                      | 0.82173700  | 2.27391700  |   |
| 0.61870800             |             |             |   |
| C                      | -2.03992300 | -1.82649600 |   |
| 1.28723500             |             |             |   |
| C                      | -1.46690200 | 3.00599000  |   |
| 1.21847600             |             |             |   |
| C                      | -3.39175300 | 1.47249400  |   |
| 1.70672800             |             |             |   |
| C                      | -3.56594100 | 0.12511900  |   |
| 1.64873500             |             |             |   |
| C                      | -2.00386200 | 1.73092700  |   |
| 1.40291800             |             |             |   |
| C                      | -2.27790400 | -0.45296000 |   |
| 1.35727000             |             |             |   |
| H                      | -4.47139800 | -0.44247300 |   |
| 1.80543800             |             |             |   |
| H                      | -4.12826300 | 2.23337400  |   |



|            |             |             |   |
|------------|-------------|-------------|---|
| 1.91940700 |             |             |   |
| N          | 2.58739400  | 0.05787300  |   |
| 0.51626900 |             |             |   |
| N          | -1.33011500 | 0.53833300  |   |
| 1.24088000 |             |             |   |
| N          | 0.42473600  | -1.66904200 |   |
| 1.16807900 |             |             |   |
| C          | 3.17226300  | 2.36489300  | - |
| 0.16063000 |             |             |   |
| C          | 2.79201600  | -2.37132400 |   |
| 0.94133600 |             |             |   |
| C          | 0.87577500  | -3.92441700 |   |
| 1.38183900 |             |             |   |
| C          | 0.38580000  | 4.54034000  |   |
| 0.51506600 |             |             |   |
| C          | 4.66213800  | -0.89404800 |   |
| 0.15833900 |             |             |   |
| C          | -0.47754400 | -3.78294400 |   |
| 1.39482300 |             |             |   |
| C          | 1.66841200  | 4.35816200  |   |
| 0.09579900 |             |             |   |
| C          | 4.75515400  | 0.41414500  | - |
| 0.20175700 |             |             |   |
| C          | 1.43741800  | -2.61214700 |   |
| 1.18611300 |             |             |   |
| C          | -0.14491100 | 3.23964900  |   |
| 0.83049900 |             |             |   |
| C          | 3.30513300  | -1.11645800 |   |
| 0.59585300 |             |             |   |
| C          | -0.75692700 | -2.37736900 |   |
| 1.27655700 |             |             |   |
| C          | 1.93808700  | 2.94413600  |   |
| 0.15535900 |             |             |   |
| C          | 3.46476600  | 1.01281700  |   |
| 0.03980200 |             |             |   |
| H          | -1.22701300 | -4.55432800 |   |
| 1.49104000 |             |             |   |
| H          | 2.37884400  | 5.10934000  | - |
| 0.21654300 |             |             |   |
| H          | 5.61621200  | 0.93622700  | - |
| 0.59195900 |             |             |   |
| H          | 1.44868400  | -4.83529200 |   |
| 1.46913300 |             |             |   |
| H          | -0.16252100 | 5.46692600  |   |

|            |             |             |             |
|------------|-------------|-------------|-------------|
| 0.60079400 |             |             |             |
| H          |             | 5.43002500  | -1.65227300 |
| 0.11681200 |             |             |             |
| N          | 0.23335800  | 0.06668600  | -           |
| 1.09850300 |             |             |             |
| C          | 0.18235700  | -1.18423100 | -           |
| 1.70060800 |             |             |             |
| C          | 1.38333500  | -1.74715300 | -           |
| 2.19429500 |             |             |             |
| C          | -1.00900000 | -3.03586200 | -           |
| 2.38297200 |             |             |             |
| C          | 1.35049400  | -3.00740700 | -           |
| 2.77717000 |             |             |             |
| H          | 2.30525000  | -1.18533500 | -           |
| 2.09425000 |             |             |             |
| C          | 0.12704700  | -3.67849200 | -           |
| 2.87695000 |             |             |             |
| H          | -1.98592500 | -3.51502800 | -           |
| 2.44337200 |             |             |             |
| H          | 2.26461800  | -3.45788300 | -           |
| 3.15714100 |             |             |             |
| H          | 0.05320000  | -4.66384100 | -           |
| 3.32696800 |             |             |             |
| N          | -0.99766500 | -1.83173100 | -           |
| 1.80415600 |             |             |             |
| C          | -5.76973400 | -0.08242400 | -           |
| 1.81012100 |             |             |             |
| C          | -5.87358400 | -1.07045400 | -           |
| 2.79448400 |             |             |             |
| C          | -4.75820600 | -1.37588500 | -           |
| 3.58417400 |             |             |             |
| C          | -3.55330200 | -0.70755900 | -           |
| 3.39470100 |             |             |             |
| C          | -3.43267700 | 0.28729400  | -           |
| 2.39479400 |             |             |             |
| C          | -4.57024700 | 0.59458200  | -           |
| 1.61261800 |             |             |             |
| H          | -6.62863700 | 0.15846900  | -           |
| 1.18908600 |             |             |             |
| H          | -6.81283800 | -1.59537500 | -           |
| 2.94671600 |             |             |             |
| H          | -4.82910600 | -2.14406100 | -           |
| 4.35019800 |             |             |             |
| H          | -2.68196900 | -0.95918200 | -           |

|            |             |            |   |
|------------|-------------|------------|---|
| 3.98874500 |             |            |   |
| H          | -4.48670300 | 1.34891400 | - |
| 0.83877200 |             |            |   |
| C          | -2.20771300 | 0.95527000 | - |
| 2.18246100 |             |            |   |
| C          | -1.05486800 | 1.33140100 | - |
| 1.90920900 |             |            |   |
| H          | -0.35381600 | 2.14209100 | - |
| 1.91325600 |             |            |   |
| C          | -2.38683900 | 4.17939300 |   |
| 1.32482400 |             |            |   |
| C          | -2.30667500 | 5.07011600 |   |
| 2.40353400 |             |            |   |
| C          | -3.34236100 | 4.40583200 |   |
| 0.32207700 |             |            |   |
| C          | -3.17066500 | 6.16431000 |   |
| 2.48289800 |             |            |   |
| H          | -1.56583300 | 4.89800200 |   |
| 3.17958100 |             |            |   |
| C          | -4.20518600 | 5.49942100 |   |
| 0.40189800 |             |            |   |
| H          | -3.39167700 | 3.72151500 | - |
| 0.52090900 |             |            |   |
| C          | -4.12200300 | 6.38046000 |   |
| 1.48337100 |             |            |   |
| H          | -3.10175500 | 6.84571300 |   |
| 3.32672100 |             |            |   |
| H          | -4.93893400 | 5.66551800 | - |
| 0.38237300 |             |            |   |
| H          | -4.79415800 | 7.23207500 |   |
| 1.54586000 |             |            |   |
| C          | 4.24209600  | 3.25532000 | - |
| 0.70502900 |             |            |   |
| C          | 4.11078900  | 3.81445900 | - |
| 1.98518900 |             |            |   |
| C          | 5.38545000  | 3.55656200 |   |
| 0.05021500 |             |            |   |
| C          | 5.10155400  | 4.65170000 | - |
| 2.49992900 |             |            |   |
| H          | 3.22647700  | 3.58479000 | - |
| 2.57304500 |             |            |   |
| C          | 6.37649800  | 4.39380800 | - |
| 0.46421600 |             |            |   |
| H          | 5.48888400  | 3.13123100 |   |

|            |             |             |   |
|------------|-------------|-------------|---|
| 1.04456100 |             |             |   |
| C          | 6.23736900  | 4.94326200  | - |
| 1.74091100 |             |             |   |
| H          | 4.98715300  | 5.07342500  | - |
| 3.49494600 |             |             |   |
| H          | 7.25458900  | 4.62063800  |   |
| 0.13461100 |             |             |   |
| H          | 7.00884200  | 5.59540700  | - |
| 2.14137200 |             |             |   |
| C          | 3.73498800  | -3.53136000 |   |
| 0.94925800 |             |             |   |
| C          | 4.72707700  | -3.63993500 |   |
| 1.93430000 |             |             |   |
| C          | 3.65461600  | -4.51934400 | - |
| 0.04437800 |             |             |   |
| C          | 5.61726600  | -4.71527300 |   |
| 1.92969700 |             |             |   |
| H          | 4.79457600  | -2.87542000 |   |
| 2.70342000 |             |             |   |
| C          | 4.54417200  | -5.59428200 | - |
| 0.04844800 |             |             |   |
| H          | 2.88894000  | -4.43264300 | - |
| 0.80998900 |             |             |   |
| C          | 5.52786000  | -5.69531600 |   |
| 0.93858600 |             |             |   |
| H          | 6.37822600  | -4.78842600 |   |
| 2.70213300 |             |             |   |
| H          | 4.47176000  | -6.35086600 | - |
| 0.82540200 |             |             |   |
| H          | 6.22081500  | -6.53239000 |   |
| 0.93496900 |             |             |   |
| C          | -3.22378500 | -2.72921400 |   |
| 1.18214800 |             |             |   |
| C          | -3.62558600 | -3.56729500 |   |
| 2.23110800 |             |             |   |
| C          | -3.95956300 | -2.72210400 | - |
| 0.01386300 |             |             |   |
| C          | -4.74382200 | -4.39122800 |   |
| 2.08628000 |             |             |   |
| H          | -3.06250900 | -3.56455100 |   |
| 3.16065400 |             |             |   |
| C          | -5.07717600 | -3.54517200 | - |
| 0.15407000 |             |             |   |
| H          | -3.64194000 | -2.07424900 | - |

|                        |             |             |   |
|------------------------|-------------|-------------|---|
| 0.82440700             |             |             |   |
| C                      | -5.47122900 | -4.38186900 |   |
| 0.89340500             |             |             |   |
| H                      | -5.04975900 | -5.03443500 |   |
| 2.90730700             |             |             |   |
| H                      | -5.63798200 | -3.52235600 | - |
| 1.08407400             |             |             |   |
| H                      | -6.34289700 | -5.02184300 |   |
| 0.78317100             |             |             |   |
| <b><sup>6</sup>TS4</b> |             |             |   |
| Mn                     | 0.64540800  | 0.27412700  |   |
| 0.62045900             |             |             |   |
| N                      | 0.92309100  | 2.27835700  |   |
| 0.57521500             |             |             |   |
| C                      | -2.00599300 | -1.78319200 |   |
| 1.27715300             |             |             |   |
| C                      | -1.34119300 | 3.05131300  |   |
| 1.21108700             |             |             |   |
| C                      | -3.27193800 | 1.54615300  |   |
| 1.75468300             |             |             |   |
| C                      | -3.47236600 | 0.19980700  |   |
| 1.69709000             |             |             |   |
| C                      | -1.89315200 | 1.78351100  |   |
| 1.41509700             |             |             |   |
| C                      | -2.20809700 | -0.40200100 |   |
| 1.36848700             |             |             |   |
| H                      | -4.38539400 | -0.34924600 |   |
| 1.87296100             |             |             |   |
| H                      | -3.99106800 | 2.31800700  |   |
| 1.98670200             |             |             |   |
| N                      | 2.65149700  | 0.01872700  |   |
| 0.48922000             |             |             |   |
| N                      | -1.24827900 | 0.57782800  |   |
| 1.23300100             |             |             |   |
| N                      | 0.45949200  | -1.68678100 |   |
| 1.12626100             |             |             |   |
| C                      | 3.28076700  | 2.32017300  | - |
| 0.18962100             |             |             |   |
| C                      | 2.81327000  | -2.42314200 |   |
| 0.90376300             |             |             |   |
| C                      | 0.86128000  | -3.95064500 |   |
| 1.29913100             |             |             |   |
| C                      | 0.53358600  | 4.54837300  |   |

|            |             |             |   |
|------------|-------------|-------------|---|
| 0.47827900 |             |             |   |
| C          | 4.70586300  | -0.96789900 |   |
| 0.14425700 |             |             |   |
| C          | -0.48868400 | -3.78096900 |   |
| 1.31398900 |             |             |   |
| C          | 1.81201000  | 4.34099900  |   |
| 0.05581600 |             |             |   |
| C          | 4.82353500  | 0.34076000  | - |
| 0.21466700 |             |             |   |
| C          | 1.45133900  | -2.64657800 |   |
| 1.13067600 |             |             |   |
| C          | -0.02237200 | 3.25987600  |   |
| 0.79872800 |             |             |   |
| C          | 3.34618800  | -1.17230900 |   |
| 0.57074800 |             |             |   |
| C          | -0.73795400 | -2.36626500 |   |
| 1.22785200 |             |             |   |
| C          | 2.05541400  | 2.92264100  |   |
| 0.11705500 |             |             |   |
| C          | 3.54602800  | 0.96159300  |   |
| 0.01684400 |             |             |   |
| H          | -1.25415300 | -4.53848600 |   |
| 1.38863000 |             |             |   |
| H          | 2.53680400  | 5.07768600  | - |
| 0.25778700 |             |             |   |
| H          | 5.69540500  | 0.84664700  | - |
| 0.60186200 |             |             |   |
| H          | 1.41363000  | -4.87603700 |   |
| 1.36198300 |             |             |   |
| H          | 0.00459300  | 5.48600000  |   |
| 0.56637000 |             |             |   |
| H          | 5.46084500  | -1.73879400 |   |
| 0.10052600 |             |             |   |
| N          | 0.27030000  | -0.03672900 | - |
| 1.41653400 |             |             |   |
| C          | 0.03030300  | -1.28240000 | - |
| 1.88991900 |             |             |   |
| C          | 1.15924200  | -2.05950600 | - |
| 2.30567700 |             |             |   |
| C          | -1.36971400 | -3.06704900 | - |
| 2.35891400 |             |             |   |
| C          | 0.97026000  | -3.36564400 | - |
| 2.71820800 |             |             |   |
| H          | 2.14514700  | -1.60715100 | - |

|            |             |             |   |
|------------|-------------|-------------|---|
| 2.27318600 |             |             |   |
| C          | -0.32626600 | -3.90295600 | - |
| 2.74893800 |             |             |   |
| H          | -2.39809200 | -3.43067100 | - |
| 2.37643100 |             |             |   |
| H          | 1.82381600  | -3.96293300 | - |
| 3.03389200 |             |             |   |
| H          | -0.51758000 | -4.92096500 | - |
| 3.07296100 |             |             |   |
| N          | -1.22461100 | -1.80891400 | - |
| 1.93017700 |             |             |   |
| C          | -5.96559700 | 0.15674200  | - |
| 1.59822300 |             |             |   |
| C          | -6.14868300 | -0.84178300 | - |
| 2.55927100 |             |             |   |
| C          | -5.07882100 | -1.21593300 | - |
| 3.38073200 |             |             |   |
| C          | -3.83602400 | -0.60488500 | - |
| 3.24291300 |             |             |   |
| C          | -3.63774500 | 0.39918500  | - |
| 2.26929900 |             |             |   |
| C          | -4.72723900 | 0.77717700  | - |
| 1.45618600 |             |             |   |
| H          | -6.79056400 | 0.45071200  | - |
| 0.95461900 |             |             |   |
| H          | -7.11637000 | -1.32440700 | - |
| 2.66815600 |             |             |   |
| H          | -5.21331400 | -1.99344600 | - |
| 4.12828700 |             |             |   |
| H          | -2.99493800 | -0.91193800 | - |
| 3.85267000 |             |             |   |
| H          | -4.57972600 | 1.54142800  | - |
| 0.70165000 |             |             |   |
| C          | -2.36957400 | 1.01416000  | - |
| 2.11104200 |             |             |   |
| C          | -1.21255700 | 1.40934500  | - |
| 1.95864300 |             |             |   |
| H          | -0.44585900 | 2.15186900  | - |
| 1.94542100 |             |             |   |
| C          | -2.24447300 | 4.23689700  |   |
| 1.31825200 |             |             |   |
| C          | -2.13403700 | 5.14470400  |   |
| 2.37991500 |             |             |   |
| C          | -3.21687900 | 4.45652300  |   |

|            |             |             |   |
|------------|-------------|-------------|---|
| 0.32986600 |             |             |   |
| C          | -2.98507900 | 6.24924800  |   |
| 2.45698100 |             |             |   |
| H          | -1.38070900 | 4.97734500  |   |
| 3.14491600 |             |             |   |
| C          | -4.06666800 | 5.56031000  |   |
| 0.40771000 |             |             |   |
| H          | -3.28722100 | 3.75944600  | - |
| 0.50121400 |             |             |   |
| C          | -3.95346300 | 6.45836700  |   |
| 1.47244000 |             |             |   |
| H          | -2.89303300 | 6.94398000  |   |
| 3.28759900 |             |             |   |
| H          | -4.81336200 | 5.72131400  | - |
| 0.36530000 |             |             |   |
| H          | -4.61553000 | 7.31792900  |   |
| 1.53342300 |             |             |   |
| C          | 4.37043200  | 3.18846600  | - |
| 0.72989300 |             |             |   |
| C          | 4.25803400  | 3.74363700  | - |
| 2.01365500 |             |             |   |
| C          | 5.51332200  | 3.47326400  |   |
| 0.03255300 |             |             |   |
| C          | 5.26683700  | 4.56156100  | - |
| 2.52444800 |             |             |   |
| H          | 3.37511700  | 3.52491700  | - |
| 2.60770200 |             |             |   |
| C          | 6.52257500  | 4.29065300  | - |
| 0.47834400 |             |             |   |
| H          | 5.60199900  | 3.05122400  |   |
| 1.02977400 |             |             |   |
| C          | 6.40197600  | 4.83680400  | - |
| 1.75835600 |             |             |   |
| H          | 5.16724200  | 4.98029400  | - |
| 3.52227800 |             |             |   |
| H          | 7.40016900  | 4.50489000  |   |
| 0.12579700 |             |             |   |
| H          | 7.18755000  | 5.47358700  | - |
| 2.15606500 |             |             |   |
| C          | 3.73959700  | -3.59595100 |   |
| 0.91128800 |             |             |   |
| C          | 4.72546400  | -3.72287000 |   |
| 1.90057800 |             |             |   |
| C          | 3.64903500  | -4.57824600 | - |



|                         |             |             |   |
|-------------------------|-------------|-------------|---|
| 0.08718600              |             |             |   |
| C                       | 5.59977900  | -4.81108800 |   |
| 1.89534500              |             |             |   |
| H                       | 4.80027800  | -2.96307600 |   |
| 2.67373700              |             |             |   |
| C                       | 4.52276200  | -5.66603300 | - |
| 0.09142900              |             |             |   |
| H                       | 2.88863600  | -4.47607900 | - |
| 0.85592400              |             |             |   |
| C                       | 5.50027400  | -5.78556600 |   |
| 0.89967500              |             |             |   |
| H                       | 6.35599900  | -4.89874200 |   |
| 2.67091000              |             |             |   |
| H                       | 4.44299800  | -6.41779600 | - |
| 0.87224100              |             |             |   |
| H                       | 6.18087700  | -6.63269500 |   |
| 0.89561400              |             |             |   |
| C                       | -3.21632100 | -2.65330200 |   |
| 1.21196100              |             |             |   |
| C                       | -3.57583100 | -3.51377300 |   |
| 2.25875500              |             |             |   |
| C                       | -4.02338800 | -2.59187600 |   |
| 0.06449700              |             |             |   |
| C                       | -4.72138200 | -4.30584600 |   |
| 2.15890200              |             |             |   |
| H                       | -2.95834200 | -3.55260800 |   |
| 3.15221800              |             |             |   |
| C                       | -5.16808200 | -3.38343300 | - |
| 0.03088200              |             |             |   |
| H                       | -3.73569700 | -1.93082700 | - |
| 0.74594200              |             |             |   |
| C                       | -5.51934800 | -4.24235100 |   |
| 1.01371500              |             |             |   |
| H                       | -4.99337500 | -4.96632000 |   |
| 2.97813300              |             |             |   |
| H                       | -5.78202000 | -3.32010100 | - |
| 0.92461100              |             |             |   |
| H                       | -6.41192200 | -4.85805600 |   |
| 0.93821800              |             |             |   |
| <b><sup>2</sup>INT5</b> |             |             |   |
| Mn                      | 0.57586700  | 0.27401400  |   |
| 0.61958600              |             |             |   |
| N                       | 0.73487400  | 2.28673800  |   |

|            |             |             |   |
|------------|-------------|-------------|---|
| 0.66239800 |             |             |   |
| C          | -1.88473800 | -1.96095600 |   |
| 1.42648600 |             |             |   |
| C          | -1.56229100 | 2.90155500  |   |
| 1.35201500 |             |             |   |
| C          | -3.39776800 | 1.26667400  |   |
| 1.86082800 |             |             |   |
| C          | -3.49869800 | -0.09028500 |   |
| 1.81920100 |             |             |   |
| C          | -2.03199000 | 1.59615000  |   |
| 1.53119900 |             |             |   |
| C          | -2.18687100 | -0.59811200 |   |
| 1.50587500 |             |             |   |
| H          | -4.36797900 | -0.70307700 |   |
| 2.00918700 |             |             |   |
| H          | -4.17190400 | 1.98464700  |   |
| 2.08764700 |             |             |   |
| N          | 2.58877700  | 0.15290100  |   |
| 0.43047900 |             |             |   |
| N          | -1.29537600 | 0.44149900  |   |
| 1.36201700 |             |             |   |
| N          | 0.55230100  | -1.68554700 |   |
| 1.15446900 |             |             |   |
| C          | 3.05121900  | 2.50364700  | - |
| 0.19181400 |             |             |   |
| C          | 2.93723000  | -2.26726900 |   |
| 0.83044600 |             |             |   |
| C          | 1.13066800  | -3.91192900 |   |
| 1.40386800 |             |             |   |
| C          | 0.21080100  | 4.54019000  |   |
| 0.66378700 |             |             |   |
| C          | 4.68606200  | -0.69700200 | - |
| 0.04766300 |             |             |   |
| C          | -0.22549800 | -3.83963900 |   |
| 1.48875800 |             |             |   |
| C          | 1.48806700  | 4.42519100  |   |
| 0.20576300 |             |             |   |
| C          | 4.70423300  | 0.62297600  | - |
| 0.38161000 |             |             |   |
| C          | 1.60938600  | -2.57571700 |   |
| 1.14459800 |             |             |   |
| C          | -0.25937100 | 3.20671700  |   |
| 0.94036500 |             |             |   |
| C          | 3.36651400  | -0.98736500 |   |

|            |             |             |   |
|------------|-------------|-------------|---|
| 0.45576100 |             |             |   |
| C          | -0.57928100 | -2.45086800 |   |
| 1.35423300 |             |             |   |
| C          | 1.80980800  | 3.02076300  |   |
| 0.19968600 |             |             |   |
| C          | 3.40546600  | 1.15710300  | - |
| 0.05761300 |             |             |   |
| H          | -0.92707200 | -4.64516300 |   |
| 1.64798900 |             |             |   |
| H          | 2.15937700  | 5.21626900  | - |
| 0.09443300 |             |             |   |
| H          | 5.52127700  | 1.18857200  | - |
| 0.80456700 |             |             |   |
| H          | 1.75323900  | -4.79028100 |   |
| 1.48543700 |             |             |   |
| H          | -0.36756600 | 5.44215600  |   |
| 0.79962900 |             |             |   |
| H          | 5.48403300  | -1.41773400 | - |
| 0.14932600 |             |             |   |
| N          | 0.01959700  | 0.12257900  | - |
| 1.21523900 |             |             |   |
| C          | 0.02970300  | -1.19800100 | - |
| 1.70781000 |             |             |   |
| C          | 1.26517000  | -1.72728200 | - |
| 2.12928000 |             |             |   |
| C          | -1.06114400 | -3.13949300 | - |
| 2.28343300 |             |             |   |
| C          | 1.30182000  | -3.01852000 | - |
| 2.63918500 |             |             |   |
| H          | 2.15453800  | -1.11350000 | - |
| 2.04939700 |             |             |   |
| C          | 0.11308300  | -3.75187100 | - |
| 2.71889600 |             |             |   |
| H          | -2.01102400 | -3.67074500 | - |
| 2.31962400 |             |             |   |
| H          | 2.24224300  | -3.44432800 | - |
| 2.97989800 |             |             |   |
| H          | 0.09518800  | -4.76495900 | - |
| 3.10881500 |             |             |   |
| N          | -1.11156400 | -1.89904900 | - |
| 1.78541300 |             |             |   |
| C          | -5.76972600 | -0.50957000 | - |
| 2.27379500 |             |             |   |
| C          | -5.88765200 | -0.78935600 | - |

|            |             |             |   |
|------------|-------------|-------------|---|
| 3.64399600 |             |             |   |
| C          | -4.78542500 | -0.58126900 | - |
| 4.48801300 |             |             |   |
| C          | -3.58380500 | -0.10991700 | - |
| 3.98285800 |             |             |   |
| C          | -3.43914600 | 0.17525800  | - |
| 2.58830700 |             |             |   |
| C          | -4.57967700 | -0.03113900 | - |
| 1.74738600 |             |             |   |
| H          | -6.61887600 | -0.66891800 | - |
| 1.61332600 |             |             |   |
| H          | -6.82428500 | -1.16222600 | - |
| 4.04884000 |             |             |   |
| H          | -4.87067000 | -0.79777400 | - |
| 5.55022400 |             |             |   |
| H          | -2.72737400 | 0.03589100  | - |
| 4.63411100 |             |             |   |
| H          | -4.48507200 | 0.18254100  | - |
| 0.68792300 |             |             |   |
| C          | -2.24520300 | 0.61358300  | - |
| 2.05909600 |             |             |   |
| C          | -1.08118200 | 0.95209800  | - |
| 1.55456000 |             |             |   |
| H          | -0.85650000 | 2.00287800  | - |
| 1.36882200 |             |             |   |
| C          | -2.53046900 | 4.02807300  |   |
| 1.51697600 |             |             |   |
| C          | -2.40848700 | 4.93689100  |   |
| 2.57766700 |             |             |   |
| C          | -3.57535200 | 4.19588800  |   |
| 0.59479500 |             |             |   |
| C          | -3.31349100 | 5.99087200  |   |
| 2.71559800 |             |             |   |
| H          | -1.60085100 | 4.80996600  |   |
| 3.29337000 |             |             |   |
| C          | -4.47988100 | 5.24918200  |   |
| 0.73336900 |             |             |   |
| H          | -3.66922700 | 3.49315200  | - |
| 0.22894700 |             |             |   |
| C          | -4.35113800 | 6.14937600  |   |
| 1.79412900 |             |             |   |
| H          | -3.20959800 | 6.68545500  |   |
| 3.54497300 |             |             |   |
| H          | -5.28234900 | 5.36847000  |   |

|            |             |             |   |
|------------|-------------|-------------|---|
| 0.01033000 |             |             |   |
| H          | -5.05541800 | 6.96991700  |   |
| 1.90182200 |             |             |   |
| C          | 4.06101600  | 3.45618300  | - |
| 0.74570600 |             |             |   |
| C          | 3.84615000  | 4.06730800  | - |
| 1.99050300 |             |             |   |
| C          | 5.23064800  | 3.76448000  | - |
| 0.03460600 |             |             |   |
| C          | 4.78082400  | 4.96170100  | - |
| 2.51387400 |             |             |   |
| H          | 2.94118100  | 3.83268900  | - |
| 2.54394800 |             |             |   |
| C          | 6.16530700  | 4.65935900  | - |
| 0.55742600 |             |             |   |
| H          | 5.39888800  | 3.29903800  |   |
| 0.93254200 |             |             |   |
| C          | 5.94319200  | 5.25990100  | - |
| 1.79887800 |             |             |   |
| H          | 4.60195200  | 5.42305300  | - |
| 3.48144000 |             |             |   |
| H          | 7.06433800  | 4.89089900  |   |
| 0.00759400 |             |             |   |
| H          | 6.67086200  | 5.95675900  | - |
| 2.20599300 |             |             |   |
| C          | 3.94486500  | -3.37097300 |   |
| 0.81972900 |             |             |   |
| C          | 5.00907800  | -3.37313300 |   |
| 1.73402300 |             |             |   |
| C          | 3.85591500  | -4.41431500 | - |
| 0.11512500 |             |             |   |
| C          | 5.95931600  | -4.39524700 |   |
| 1.71712800 |             |             |   |
| H          | 5.08405600  | -2.56702900 |   |
| 2.45857300 |             |             |   |
| C          | 4.80588200  | -5.43611200 | - |
| 0.13238200 |             |             |   |
| H          | 3.03453800  | -4.41398000 | - |
| 0.82539100 |             |             |   |
| C          | 5.86047800  | -5.42969900 |   |
| 0.78379500 |             |             |   |
| H          | 6.77473400  | -4.38479400 |   |
| 2.43549800 |             |             |   |
| H          | 4.72454200  | -6.23521700 | - |

|              |             |             |   |
|--------------|-------------|-------------|---|
| 0.86459300   |             |             |   |
| H            | 6.60042000  | -6.22540600 |   |
| 0.77035100   |             |             |   |
| C            | -3.02967600 | -2.91780400 |   |
| 1.36855400   |             |             |   |
| C            | -3.36510300 | -3.76240600 |   |
| 2.43477800   |             |             |   |
| C            | -3.80328000 | -2.95042900 |   |
| 0.19674800   |             |             |   |
| C            | -4.45538800 | -4.62962000 |   |
| 2.33068100   |             |             |   |
| H            | -2.77439200 | -3.73044200 |   |
| 3.34642700   |             |             |   |
| C            | -4.89434900 | -3.81363900 |   |
| 0.09749300   |             |             |   |
| H            | -3.53364500 | -2.29697400 | - |
| 0.62708300   |             |             |   |
| C            | -5.22232200 | -4.65637800 |   |
| 1.16326500   |             |             |   |
| H            | -4.70970500 | -5.27802500 |   |
| 3.16509300   |             |             |   |
| H            | -5.48719300 | -3.82183000 | - |
| 0.81354700   |             |             |   |
| H            | -6.07264300 | -5.32897900 |   |
| 1.08648800   |             |             |   |
| <b>4INT5</b> |             |             |   |
| Mn           | 0.56906300  | 0.27974000  |   |
| 0.62317100   |             |             |   |
| N            | 0.70151200  | 2.29164700  |   |
| 0.66386100   |             |             |   |
| C            | -1.85764800 | -1.98887300 |   |
| 1.41773600   |             |             |   |
| C            | -1.59932000 | 2.87670000  |   |
| 1.37207400   |             |             |   |
| C            | -3.41441500 | 1.21505100  |   |
| 1.87175700   |             |             |   |
| C            | -3.49784600 | -0.14279000 |   |
| 1.81861700   |             |             |   |
| C            | -2.05317000 | 1.56496400  |   |
| 1.54468300   |             |             |   |
| C            | -2.17922200 | -0.63115200 |   |
| 1.50359600   |             |             |   |
| H            | -4.35926900 | -0.76842700 |   |

|            |             |             |   |
|------------|-------------|-------------|---|
| 2.00255900 |             |             |   |
| H          | -4.19805800 | 1.92104000  |   |
| 2.10348000 |             |             |   |
| N          | 2.58180500  | 0.18763200  |   |
| 0.42789800 |             |             |   |
| N          | -1.30126000 | 0.42126800  |   |
| 1.36762600 |             |             |   |
| N          | 0.57691300  | -1.67739300 |   |
| 1.15958700 |             |             |   |
| C          | 3.00683900  | 2.54103300  | - |
| 0.20976600 |             |             |   |
| C          | 2.97040400  | -2.22400800 |   |
| 0.84411700 |             |             |   |
| C          | 1.18619700  | -3.89512900 |   |
| 1.41228300 |             |             |   |
| C          | 0.14632200  | 4.53787100  |   |
| 0.67028800 |             |             |   |
| C          | 4.69160800  | -0.63227300 | - |
| 0.04816800 |             |             |   |
| C          | -0.17156300 | -3.84286700 |   |
| 1.48710300 |             |             |   |
| C          | 1.42047300  | 4.44050300  |   |
| 0.19978900 |             |             |   |
| C          | 4.68723500  | 0.68444900  | - |
| 0.39513000 |             |             |   |
| C          | 1.64678700  | -2.55231700 |   |
| 1.15508500 |             |             |   |
| C          | -0.30340600 | 3.19826400  |   |
| 0.95094100 |             |             |   |
| C          | 3.37830600  | -0.93969700 |   |
| 0.46117500 |             |             |   |
| C          | -0.54476600 | -2.45946700 |   |
| 1.35123200 |             |             |   |
| C          | 1.76168800  | 3.04095300  |   |
| 0.19109000 |             |             |   |
| C          | 3.38141200  | 1.20066100  | - |
| 0.07103100 |             |             |   |
| H          | -0.86257800 | -4.65848900 |   |
| 1.64112000 |             |             |   |
| H          | 2.07796200  | 5.24062800  | - |
| 0.10695800 |             |             |   |
| H          | 5.49378100  | 1.25935900  | - |
| 0.82557600 |             |             |   |
| H          | 1.82106600  | -4.76420600 |   |

|            |             |             |   |
|------------|-------------|-------------|---|
| 1.49820300 |             |             |   |
| H          | -0.44319900 | 5.43173800  |   |
| 0.81160000 |             |             |   |
| H          | 5.50093000  | -1.34088800 | - |
| 0.14518200 |             |             |   |
| N          | 0.00348700  | 0.10400600  | - |
| 1.20035200 |             |             |   |
| C          | 0.05371500  | -1.20857600 | - |
| 1.70862300 |             |             |   |
| C          | 1.30499600  | -1.71076800 | - |
| 2.11576400 |             |             |   |
| C          | -0.98858700 | -3.17028700 | - |
| 2.30685600 |             |             |   |
| C          | 1.37603700  | -3.00056000 | - |
| 2.62597400 |             |             |   |
| H          | 2.18024400  | -1.07867900 | - |
| 2.02478300 |             |             |   |
| C          | 0.20463500  | -3.75895300 | - |
| 2.72349500 |             |             |   |
| H          | -1.92733300 | -3.71961100 | - |
| 2.36157300 |             |             |   |
| H          | 2.32996200  | -3.40528500 | - |
| 2.95476000 |             |             |   |
| H          | 0.21328700  | -4.77113100 | - |
| 3.11605500 |             |             |   |
| N          | -1.07232100 | -1.93206900 | - |
| 1.80842800 |             |             |   |
| C          | -5.77173900 | -0.57455300 | - |
| 2.29224600 |             |             |   |
| C          | -5.89340000 | -0.83087800 | - |
| 3.66704400 |             |             |   |
| C          | -4.79639400 | -0.59879800 | - |
| 4.51201500 |             |             |   |
| C          | -3.59732700 | -0.12429900 | - |
| 4.00442900 |             |             |   |
| C          | -3.44736100 | 0.13508900  | - |
| 2.60461200 |             |             |   |
| C          | -4.58278700 | -0.09869900 | - |
| 1.76201600 |             |             |   |
| H          | -6.61674900 | -0.75290100 | - |
| 1.63126400 |             |             |   |
| H          | -6.82865900 | -1.20440000 | - |
| 4.07444900 |             |             |   |
| H          | -4.88491500 | -0.79693000 | - |



|            |             |            |   |
|------------|-------------|------------|---|
| 5.57756500 |             |            |   |
| H          | -2.74592200 | 0.04298100 | - |
| 4.65711900 |             |            |   |
| H          | -4.48438800 | 0.09483800 | - |
| 0.69896000 |             |            |   |
| C          | -2.25621000 | 0.57075200 | - |
| 2.07141300 |             |            |   |
| C          | -1.10790300 | 0.91566800 | - |
| 1.53760700 |             |            |   |
| H          | -0.90901800 | 1.96785500 | - |
| 1.32923700 |             |            |   |
| C          | -2.57788500 | 3.99187100 |   |
| 1.55220900 |             |            |   |
| C          | -2.45596400 | 4.89421000 |   |
| 2.61845500 |             |            |   |
| C          | -3.63180400 | 4.15622100 |   |
| 0.63980300 |             |            |   |
| C          | -3.37003200 | 5.93820200 |   |
| 2.77154500 |             |            |   |
| H          | -1.64111600 | 4.77018000 |   |
| 3.32645300 |             |            |   |
| C          | -4.54542600 | 5.19954100 |   |
| 0.79352400 |             |            |   |
| H          | -3.72562700 | 3.45888500 | - |
| 0.18848500 |             |            |   |
| C          | -4.41677200 | 6.09316900 |   |
| 1.85980800 |             |            |   |
| H          | -3.26600200 | 6.62779500 |   |
| 3.60505000 |             |            |   |
| H          | -5.35484900 | 5.31625900 |   |
| 0.07786900 |             |            |   |
| H          | -5.12810400 | 6.90595400 |   |
| 1.97926000 |             |            |   |
| C          | 3.99746000  | 3.50611200 | - |
| 0.77622600 |             |            |   |
| C          | 3.76212200  | 4.10857300 | - |
| 2.02154800 |             |            |   |
| C          | 5.16828800  | 3.83549600 | - |
| 0.07666900 |             |            |   |
| C          | 4.67831600  | 5.01491200 | - |
| 2.55689800 |             |            |   |
| H          | 2.85602200  | 3.85775600 | - |
| 2.56596700 |             |            |   |
| C          | 6.08440900  | 4.74237300 | - |

|            |             |             |   |
|------------|-------------|-------------|---|
| 0.61148800 |             |             |   |
| H          | 5.35208000  | 3.37710600  |   |
| 0.89101700 |             |             |   |
| C          | 5.84219600  | 5.33398300  | - |
| 1.85346900 |             |             |   |
| H          | 4.48384000  | 5.46931500  | - |
| 3.52473300 |             |             |   |
| H          | 6.98463200  | 4.99023400  | - |
| 0.05536900 |             |             |   |
| H          | 6.55544700  | 6.04016200  | - |
| 2.26992000 |             |             |   |
| C          | 3.99654100  | -3.31051400 |   |
| 0.84191800 |             |             |   |
| C          | 5.05841400  | -3.28873600 |   |
| 1.75866200 |             |             |   |
| C          | 3.92815900  | -4.36038500 | - |
| 0.08733600 |             |             |   |
| C          | 6.02639100  | -4.29416500 |   |
| 1.74987300 |             |             |   |
| H          | 5.11761000  | -2.47728400 |   |
| 2.47869900 |             |             |   |
| C          | 4.89594100  | -5.36543500 | - |
| 0.09648300 |             |             |   |
| H          | 3.10893800  | -4.37829200 | - |
| 0.79983700 |             |             |   |
| C          | 5.94793700  | -5.33543800 |   |
| 0.82221100 |             |             |   |
| H          | 6.83976700  | -4.26533900 |   |
| 2.47004800 |             |             |   |
| H          | 4.83048700  | -6.16985700 | - |
| 0.82443900 |             |             |   |
| H          | 6.70171200  | -6.11813100 |   |
| 0.81503300 |             |             |   |
| C          | -2.98863900 | -2.96163600 |   |
| 1.35082700 |             |             |   |
| C          | -3.32220900 | -3.80853400 |   |
| 2.41577700 |             |             |   |
| C          | -3.75101700 | -3.00634200 |   |
| 0.17209100 |             |             |   |
| C          | -4.40030600 | -4.68989500 |   |
| 2.30390200 |             |             |   |
| H          | -2.73984600 | -3.76729500 |   |
| 3.33243000 |             |             |   |
| C          | -4.83009200 | -3.88367400 |   |

|              |             |             |   |
|--------------|-------------|-------------|---|
| 0.06529100   |             |             |   |
| H            | -3.48151800 | -2.35196700 | - |
| 0.65109400   |             |             |   |
| C            | -5.15663200 | -4.72840800 |   |
| 1.12991000   |             |             |   |
| H            | -4.65349800 | -5.34010400 |   |
| 3.13725000   |             |             |   |
| H            | -5.41488700 | -3.90121900 | - |
| 0.85078500   |             |             |   |
| H            | -5.99764300 | -5.41191000 |   |
| 1.04705300   |             |             |   |
| <b>6INT5</b> |             |             |   |
| Mn           | 0.63730800  | 0.29496500  |   |
| 0.61636600   |             |             |   |
| N            | 0.30170400  | 2.28075700  |   |
| 0.70285300   |             |             |   |
| C            | -1.22762100 | -2.48030500 |   |
| 1.22785900   |             |             |   |
| C            | -2.01800000 | 2.31545500  |   |
| 1.58240600   |             |             |   |
| C            | -3.35880600 | 0.26543900  |   |
| 2.15076400   |             |             |   |
| C            | -3.16108800 | -1.06973200 |   |
| 1.96952900   |             |             |   |
| C            | -2.14727100 | 0.93187900  |   |
| 1.74108400   |             |             |   |
| C            | -1.81073600 | -1.23667700 |   |
| 1.49785600   |             |             |   |
| H            | -3.85049800 | -1.88014000 |   |
| 2.15550300   |             |             |   |
| H            | -4.24800500 | 0.76377400  |   |
| 2.50689700   |             |             |   |
| N            | 2.60681800  | 0.66298700  |   |
| 0.37144900   |             |             |   |
| N            | -1.19334800 | -0.00965900 |   |
| 1.41450400   |             |             |   |
| N            | 1.08630100  | -1.63598800 |   |
| 1.02242100   |             |             |   |
| C            | 2.44958300  | 3.04994600  | - |
| 0.27029300   |             |             |   |
| C            | 3.54835300  | -1.59749400 |   |
| 0.76923400   |             |             |   |
| C            | 2.16149300  | -3.67168800 |   |

|            |             |             |   |
|------------|-------------|-------------|---|
| 1.07388600 |             |             |   |
| C          | -0.76063500 | 4.32379400  |   |
| 0.74630100 |             |             |   |
| C          | 4.86341000  | 0.39239700  | - |
| 0.00851400 |             |             |   |
| C          | 0.82271000  | -3.92449900 |   |
| 1.07737900 |             |             |   |
| C          | 0.46585300  | 4.51879500  |   |
| 0.18423100 |             |             |   |
| C          | 4.54361800  | 1.66363700  | - |
| 0.37812900 |             |             |   |
| C          | 2.32513800  | -2.24388100 |   |
| 0.98381600 |             |             |   |
| C          | -0.86707500 | 2.92496500  |   |
| 1.06530400 |             |             |   |
| C          | 3.65053100  | -0.23946900 |   |
| 0.44443400 |             |             |   |
| C          | 0.15246800  | -2.65270800 |   |
| 1.08566300 |             |             |   |
| C          | 1.13073600  | 3.24361700  |   |
| 0.16124800 |             |             |   |
| C          | 3.13999100  | 1.84386400  | - |
| 0.11256200 |             |             |   |
| H          | 0.32683200  | -4.88318000 |   |
| 1.10081000 |             |             |   |
| H          | 0.89457200  | 5.44386700  | - |
| 0.17190100 |             |             |   |
| H          | 5.19732500  | 2.42080000  | - |
| 0.78483100 |             |             |   |
| H          | 2.96977700  | -4.38713400 |   |
| 1.09437700 |             |             |   |
| H          | -1.53368100 | 5.05656800  |   |
| 0.92406400 |             |             |   |
| H          | 5.82675500  | -0.09275900 | - |
| 0.06350100 |             |             |   |
| N          | -0.11959800 | -0.03981800 | - |
| 1.33303800 |             |             |   |
| C          | 0.10715800  | -1.27819200 | - |
| 1.89843900 |             |             |   |
| C          | 1.44713300  | -1.70056600 | - |
| 2.10063000 |             |             |   |
| C          | -0.67609200 | -3.27576000 | - |
| 2.76025900 |             |             |   |
| C          | 1.68752200  | -2.95587900 | - |

|            |             |             |   |
|------------|-------------|-------------|---|
| 2.62905100 |             |             |   |
| H          | 2.25358300  | -1.02551700 | - |
| 1.83731400 |             |             |   |
| C          | 0.60360000  | -3.78165000 | - |
| 2.96591500 |             |             |   |
| H          | -1.55262700 | -3.87300400 | - |
| 3.01041100 |             |             |   |
| H          | 2.70903000  | -3.29019900 | - |
| 2.79670700 |             |             |   |
| H          | 0.74901500  | -4.77354300 | - |
| 3.38224200 |             |             |   |
| N          | -0.93055200 | -2.06755200 | - |
| 2.24379700 |             |             |   |
| C          | -6.13184000 | -0.69659000 | - |
| 1.70931100 |             |             |   |
| C          | -6.53715900 | -0.59147800 | - |
| 3.04880500 |             |             |   |
| C          | -5.58678800 | -0.26640600 | - |
| 4.03048700 |             |             |   |
| C          | -4.26049900 | -0.04910300 | - |
| 3.69224800 |             |             |   |
| C          | -3.82284500 | -0.14394200 | - |
| 2.33159600 |             |             |   |
| C          | -4.81022400 | -0.48268300 | - |
| 1.34797100 |             |             |   |
| H          | -6.86070300 | -0.94967400 | - |
| 0.94221500 |             |             |   |
| H          | -7.57412600 | -0.76229400 | - |
| 3.32431500 |             |             |   |
| H          | -5.89316900 | -0.18545400 | - |
| 5.07103200 |             |             |   |
| H          | -3.52662400 | 0.19409600  | - |
| 4.45484200 |             |             |   |
| H          | -4.49774900 | -0.56831400 | - |
| 0.31263400 |             |             |   |
| C          | -2.50069500 | 0.03427900  | - |
| 1.97904400 |             |             |   |
| C          | -1.37503400 | 0.54771000  | - |
| 1.51867600 |             |             |   |
| H          | -1.37961600 | 1.59825600  | - |
| 1.21326700 |             |             |   |
| C          | -3.21180900 | 3.17165900  |   |
| 1.85063500 |             |             |   |
| C          | -3.20873400 | 4.11263200  |   |

|            |             |             |   |
|------------|-------------|-------------|---|
| 2.89035800 |             |             |   |
| C          | -4.35454300 | 3.05192800  |   |
| 1.04243600 |             |             |   |
| C          | -4.32687100 | 4.91557100  |   |
| 3.12208200 |             |             |   |
| H          | -2.32603000 | 4.20739100  |   |
| 3.51693500 |             |             |   |
| C          | -5.47087700 | 3.85555500  |   |
| 1.27549700 |             |             |   |
| H          | -4.35922600 | 2.32838700  |   |
| 0.23122500 |             |             |   |
| C          | -5.46017400 | 4.78862000  |   |
| 2.31551900 |             |             |   |
| H          | -4.31334500 | 5.63698300  |   |
| 3.93472800 |             |             |   |
| H          | -6.34657000 | 3.75462400  |   |
| 0.64015400 |             |             |   |
| H          | -6.33021800 | 5.41416300  |   |
| 2.49600300 |             |             |   |
| C          | 3.16486900  | 4.21701300  | - |
| 0.87003700 |             |             |   |
| C          | 2.78742400  | 4.69537000  | - |
| 2.13386500 |             |             |   |
| C          | 4.20535500  | 4.86138200  | - |
| 0.18424300 |             |             |   |
| C          | 3.44057500  | 5.79024700  | - |
| 2.70160900 |             |             |   |
| H          | 1.98093700  | 4.19977600  | - |
| 2.66707100 |             |             |   |
| C          | 4.85899100  | 5.95573200  | - |
| 0.75263500 |             |             |   |
| H          | 4.49435100  | 4.50050700  |   |
| 0.79898200 |             |             |   |
| C          | 4.47846400  | 6.42252800  | - |
| 2.01297500 |             |             |   |
| H          | 3.14015500  | 6.14678100  | - |
| 3.68315300 |             |             |   |
| H          | 5.66109400  | 6.44680100  | - |
| 0.20813100 |             |             |   |
| H          | 4.98685300  | 7.27501300  | - |
| 2.45517700 |             |             |   |
| C          | 4.80353300  | -2.40838800 |   |
| 0.77701400 |             |             |   |
| C          | 5.76865300  | -2.21152000 |   |

|            |             |             |   |
|------------|-------------|-------------|---|
| 1.77566300 |             |             |   |
| C          | 5.05000700  | -3.36024700 | - |
| 0.22433200 |             |             |   |
| C          | 6.95089300  | -2.95353800 |   |
| 1.77680200 |             |             |   |
| H          | 5.58409100  | -1.47325400 |   |
| 2.55119100 |             |             |   |
| C          | 6.23117000  | -4.10292900 | - |
| 0.22260400 |             |             |   |
| H          | 4.30714200  | -3.51005200 | - |
| 1.00238700 |             |             |   |
| C          | 7.18481500  | -3.90166100 |   |
| 0.77822900 |             |             |   |
| H          | 7.68727200  | -2.79270200 |   |
| 2.55962100 |             |             |   |
| H          | 6.40881400  | -4.83430400 | - |
| 1.00650300 |             |             |   |
| H          | 8.10514400  | -4.47931100 |   |
| 0.77905700 |             |             |   |
| C          | -2.14636400 | -3.64635300 |   |
| 1.08535200 |             |             |   |
| C          | -2.17963400 | -4.69894300 |   |
| 2.01050400 |             |             |   |
| C          | -3.02535500 | -3.66507500 | - |
| 0.01138900 |             |             |   |
| C          | -3.07222000 | -5.75915700 |   |
| 1.84007600 |             |             |   |
| H          | -1.51375900 | -4.67576400 |   |
| 2.86903800 |             |             |   |
| C          | -3.91673000 | -4.72520700 | - |
| 0.17623500 |             |             |   |
| H          | -2.98399900 | -2.85460200 | - |
| 0.73339900 |             |             |   |
| C          | -3.94186100 | -5.77424500 |   |
| 0.74685500 |             |             |   |
| H          | -3.09368600 | -6.56775100 |   |
| 2.56598800 |             |             |   |
| H          | -4.59203800 | -4.72746200 | - |
| 1.02759200 |             |             |   |
| H          | -4.63783300 | -6.59889200 |   |
| 0.61718700 |             |             |   |
| <b>4</b>   |             |             |   |
| N          | 1.82299500  | 2.06980900  |   |

|            |             |             |   |
|------------|-------------|-------------|---|
| 0.33941500 |             |             |   |
| C          | 2.22416700  | 0.81598300  |   |
| 0.13565300 |             |             |   |
| C          | 3.52674400  | 0.27567700  |   |
| 0.04253600 |             |             |   |
| C          | 1.29131000  | -1.38954800 | - |
| 0.29953700 |             |             |   |
| C          | 3.69225300  | -1.06459600 | - |
| 0.21205300 |             |             |   |
| H          | 4.36293300  | 0.95383600  |   |
| 0.17025500 |             |             |   |
| C          | 2.55481400  | -1.90215000 | - |
| 0.39556800 |             |             |   |
| H          | 0.39015900  | -1.96831000 | - |
| 0.45238600 |             |             |   |
| H          | 4.68829700  | -1.48959500 | - |
| 0.28513500 |             |             |   |
| H          | 2.67532200  | -2.95594300 | - |
| 0.62174200 |             |             |   |
| N          | 1.12217100  | -0.05507800 | - |
| 0.01125000 |             |             |   |
| C          | -3.70011800 | 0.57767300  | - |
| 0.66660100 |             |             |   |
| C          | -4.08405300 | -0.61129100 | - |
| 0.04093500 |             |             |   |
| C          | -3.12841000 | -1.37170300 |   |
| 0.63686000 |             |             |   |
| C          | -1.80055200 | -0.94929300 |   |
| 0.68967600 |             |             |   |
| C          | -1.39766600 | 0.23752600  |   |
| 0.04874400 |             |             |   |
| C          | -2.37084500 | 0.99434100  | - |
| 0.62937100 |             |             |   |
| H          | -4.43594100 | 1.17652500  | - |
| 1.19668200 |             |             |   |
| H          | -5.11865500 | -0.94065400 | - |
| 0.07901100 |             |             |   |
| H          | -3.41961700 | -2.28996100 |   |
| 1.14003500 |             |             |   |
| H          | -1.07729400 | -1.52493300 |   |
| 1.26031400 |             |             |   |
| H          | -2.06889700 | 1.90521800  | - |
| 1.13846000 |             |             |   |
| C          | -0.02040100 | 0.72880400  |   |



|            |  |             |            |
|------------|--|-------------|------------|
| 0.11073000 |  |             |            |
| C          |  | 0.46692700  | 2.01405300 |
| 0.31736000 |  |             |            |
| H          |  | -0.13747600 | 2.89784300 |
| 0.48070500 |  |             |            |

**<sup>2</sup>TS5**

|            |             |            |             |   |
|------------|-------------|------------|-------------|---|
| Mn         | 1.00572000  | 0.19679600 | -0.69385400 |   |
| N          | 0.89719200  |            | 2.23319600  | - |
| 0.64019700 |             |            |             |   |
| C          | 3.54569400  |            | -2.11671300 | - |
| 0.29131000 |             |            |             |   |
| C          | 3.28014600  |            | 2.74538200  | - |
| 0.11825100 |             |            |             |   |
| C          | 5.16708000  |            | 1.08295800  | - |
| 0.02839200 |             |            |             |   |
| C          | 5.23843600  |            | -0.27221400 | - |
| 0.06522000 |             |            |             |   |
| C          | 3.77400900  |            | 1.44129500  | - |
| 0.19044600 |             |            |             |   |
| C          | 3.89317900  |            | -0.76440000 | - |
| 0.27884000 |             |            |             |   |
| H          |             | 6.11682600 | -0.89069500 |   |
| 0.04454900 |             |            |             |   |
| H          |             | 5.97852100 | 1.78332600  |   |
| 0.10245500 |             |            |             |   |
| N          | -0.96581300 |            | 0.09376200  | - |
| 1.15020100 |             |            |             |   |
| N          | 3.01114900  |            | 0.29821600  | - |
| 0.37608500 |             |            |             |   |
| N          | 1.11419900  |            | -1.83867500 | - |
| 0.74748700 |             |            |             |   |
| C          | -1.53509700 |            | 2.50310800  | - |
| 1.08325200 |             |            |             |   |
| C          | -1.25615000 |            | -2.35764400 | - |
| 1.32079800 |             |            |             |   |
| C          | 0.50833500  |            | -4.05693100 | - |
| 0.71868500 |             |            |             |   |
| C          | 1.38317600  |            | 4.40854100  | - |
| 0.06920200 |             |            |             |   |
| C          | -3.02005900 |            | -0.66682800 | - |
| 1.91564900 |             |            |             |   |
| C          | 1.86273200  |            | -3.99203100 | - |
| 0.44394100 |             |            |             |   |

|            |             |             |   |
|------------|-------------|-------------|---|
| C          | 0.02633500  | 4.33858200  | - |
| 0.33039000 |             |             |   |
| C          | -3.09130500 | 0.68718100  | - |
| 1.85216800 |             |             |   |
| C          | 0.07036800  | -2.72450200 | - |
| 0.92924200 |             |             |   |
| C          | 1.90642600  | 3.10576400  | - |
| 0.27736000 |             |             |   |
| C          | -1.70211100 | -1.04231200 | - |
| 1.45146100 |             |             |   |
| C          | 2.21802800  | -2.61809000 | - |
| 0.46714300 |             |             |   |
| C          | -0.24850200 | 2.99499400  | - |
| 0.69410100 |             |             |   |
| C          | -1.82219700 | 1.16210500  | - |
| 1.34695500 |             |             |   |
| H          | 2.53581600  | -4.81681100 | - |
| 0.26349000 |             |             |   |
| H          | -0.69910300 | 5.13593800  | - |
| 0.26566400 |             |             |   |
| H          | -3.91304800 | 1.32402800  | - |
| 2.13326100 |             |             |   |
| H          | -0.11028100 | -4.93997500 | - |
| 0.77632800 |             |             |   |
| H          | 1.94819700  | 5.27327700  |   |
| 0.24568800 |             |             |   |
| H          | -3.78085000 | -1.35577800 | - |
| 2.25047500 |             |             |   |
| C          | -2.64121400 | 3.49296100  | - |
| 1.20579000 |             |             |   |
| C          | -3.76830000 | 3.40679900  | - |
| 0.37269300 |             |             |   |
| C          | -2.58357600 | 4.52747300  | - |
| 2.15408300 |             |             |   |
| C          | -4.81857200 | 4.31672400  | - |
| 0.49285700 |             |             |   |
| H          | -3.81802600 | 2.62563500  |   |
| 0.37813200 |             |             |   |
| C          | -3.63541300 | 5.43523000  | - |
| 2.27807500 |             |             |   |
| H          | -1.71166000 | 4.60678100  | - |
| 2.79669600 |             |             |   |
| C          | -4.75670300 | 5.33219100  | - |
| 1.44974800 |             |             |   |

|            |             |             |   |
|------------|-------------|-------------|---|
| H          | -5.68022600 | 4.22734800  |   |
| 0.16339100 |             |             |   |
| H          | -3.58107100 | 6.22229000  | - |
| 3.02548100 |             |             |   |
| H          | -5.57432900 | 6.04114500  | - |
| 1.54818200 |             |             |   |
| C          | 4.24001000  | 3.84920800  |   |
| 0.16474100 |             |             |   |
| C          | 4.43577300  | 4.87918700  | - |
| 0.77027800 |             |             |   |
| C          | 4.95680300  | 3.88971500  |   |
| 1.37159600 |             |             |   |
| C          | 5.33558000  | 5.91236100  | - |
| 0.51079600 |             |             |   |
| H          | 3.87812800  | 4.85839400  | - |
| 1.70183600 |             |             |   |
| C          | 5.84997600  | 4.92871200  |   |
| 1.63492900 |             |             |   |
| H          | 4.80261000  | 3.10228500  |   |
| 2.10379200 |             |             |   |
| C          | 6.04447200  | 5.94140100  |   |
| 0.69315000 |             |             |   |
| H          | 5.48356300  | 6.69537300  | - |
| 1.24963900 |             |             |   |
| H          | 6.39065800  | 4.94832800  |   |
| 2.57738900 |             |             |   |
| H          | 6.74191600  | 6.74942800  |   |
| 0.89656500 |             |             |   |
| C          | 4.63566800  | -3.11837500 | - |
| 0.10760200 |             |             |   |
| C          | 5.62726300  | -3.28334500 | - |
| 1.08731200 |             |             |   |
| C          | 4.69249200  | -3.91341800 |   |
| 1.04774000 |             |             |   |
| C          | 6.64991300  | -4.21697800 | - |
| 0.91450200 |             |             |   |
| H          | 5.58679400  | -2.67489500 | - |
| 1.98628200 |             |             |   |
| C          | 5.71685900  | -4.84367500 |   |
| 1.22319000 |             |             |   |
| H          | 3.92544900  | -3.79556800 |   |
| 1.80696100 |             |             |   |
| C          | 6.69893300  | -4.99880100 |   |
| 0.24175600 |             |             |   |

|            |             |             |   |
|------------|-------------|-------------|---|
| H          | 7.40657800  | -4.33521600 | - |
| 1.68548700 |             |             |   |
| H          | 5.74897200  | -5.44607900 |   |
| 2.12716400 |             |             |   |
| H          | 7.49584500  | -5.72496500 |   |
| 0.37684100 |             |             |   |
| C          | -2.20721700 | -3.46064800 | - |
| 1.63083200 |             |             |   |
| C          | -3.38597800 | -3.62936100 | - |
| 0.88657700 |             |             |   |
| C          | -1.93552000 | -4.35272500 | - |
| 2.68275900 |             |             |   |
| C          | -4.27155100 | -4.66390700 | - |
| 1.19013400 |             |             |   |
| H          | -3.59695000 | -2.96624800 | - |
| 0.05629300 |             |             |   |
| C          | -2.82851500 | -5.37762900 | - |
| 2.99175100 |             |             |   |
| H          | -1.02248500 | -4.22954800 | - |
| 3.25777400 |             |             |   |
| C          | -3.99914700 | -5.53748400 | - |
| 2.24481300 |             |             |   |
| H          | -5.17185300 | -4.78633700 | - |
| 0.59439600 |             |             |   |
| H          | -2.61040000 | -6.05131200 | - |
| 3.81619200 |             |             |   |
| H          | -4.69194600 | -6.34045800 | - |
| 2.48217800 |             |             |   |
| N          | -1.94822000 | -1.14426600 |   |
| 2.02023600 |             |             |   |
| N          | -2.61581100 | -2.27964500 |   |
| 2.36693800 |             |             |   |
| N          | -3.88298800 | -2.03694900 |   |
| 2.24134400 |             |             |   |
| C          | -0.54348300 | -1.05928400 |   |
| 2.20886200 |             |             |   |
| C          | 0.18282400  | -2.19912000 |   |
| 2.56510500 |             |             |   |
| C          | 1.30288800  | 0.28618500  |   |
| 2.28506200 |             |             |   |
| C          | 1.54390200  | -2.03679000 |   |
| 2.80150000 |             |             |   |
| H          | -0.30977700 | -3.15885800 |   |
| 2.64310900 |             |             |   |

|            |             |             |   |
|------------|-------------|-------------|---|
| C          | 2.12219600  | -0.77292500 |   |
| 2.67321400 |             |             |   |
| H          | 1.70683700  | 1.28210600  |   |
| 2.12758500 |             |             |   |
| H          | 2.14584400  | -2.89590900 |   |
| 3.08025000 |             |             |   |
| H          | 3.18411600  | -0.61466700 |   |
| 2.82589400 |             |             |   |
| N          | -0.01343000 | 0.15367300  |   |
| 2.05241500 |             |             |   |
| C          | -4.06932300 | -0.74070200 |   |
| 1.80728800 |             |             |   |
| C          | -2.82408600 | -0.16265000 |   |
| 1.66332900 |             |             |   |
| C          | -5.42559000 | -0.17145400 |   |
| 1.71856800 |             |             |   |
| C          | -6.32845500 | -0.47895500 |   |
| 2.75316000 |             |             |   |
| C          | -5.85833600 | 0.66623800  |   |
| 0.67953400 |             |             |   |
| C          | -7.61442600 | 0.05602500  |   |
| 2.76613300 |             |             |   |
| H          | -6.00179600 | -1.13997100 |   |
| 3.54971500 |             |             |   |
| C          | -7.14624100 | 1.20976600  |   |
| 0.70333400 |             |             |   |
| H          | -5.25061300 | 0.88154300  | - |
| 0.19208200 |             |             |   |
| C          | -8.02662300 | 0.91515300  |   |
| 1.74453400 |             |             |   |
| H          | -8.29211400 | -0.19253900 |   |
| 3.57856900 |             |             |   |
| H          | -7.46230900 | 1.85562500  | - |
| 0.11209100 |             |             |   |
| H          | -9.02643300 | 1.34086400  |   |
| 1.75513300 |             |             |   |
| H          | -2.48317300 | 0.81493000  |   |
| 1.36833900 |             |             |   |

**<sup>4</sup>TS5**

|            |            |            |             |
|------------|------------|------------|-------------|
| Mn         | 0.82662100 | 0.23574700 | -0.69656300 |
| N          | 1.23811400 | 2.21431700 | -           |
| 0.54164000 |            |            |             |

|            |             |             |   |
|------------|-------------|-------------|---|
| C          | 2.69387900  | -2.64788500 | - |
| 0.58293700 |             |             |   |
| C          | 3.70857100  | 2.11609500  | - |
| 0.34964400 |             |             |   |
| C          | 5.11301500  | 0.02405100  | - |
| 0.47302900 |             |             |   |
| C          | 4.82583200  | -1.30755600 | - |
| 0.49047600 |             |             |   |
| C          | 3.85193100  | 0.72820300  | - |
| 0.51889700 |             |             |   |
| C          | 3.39066600  | -1.42936400 | - |
| 0.59309200 |             |             |   |
| H          | 5.51983400  | -2.13410000 | - |
| 0.44425500 |             |             |   |
| H          | 6.08611400  | 0.48963200  | - |
| 0.41709300 |             |             |   |
| N          | -1.11647700 | 0.66592400  | - |
| 1.06662400 |             |             |   |
| N          | 2.81806500  | -0.17629700 | - |
| 0.63116000 |             |             |   |
| N          | 0.42550200  | -1.73179300 | - |
| 0.96725600 |             |             |   |
| C          | -1.06343600 | 3.11164400  | - |
| 0.67192900 |             |             |   |
| C          | -1.99359200 | -1.61271300 | - |
| 1.48860400 |             |             |   |
| C          | -0.70522500 | -3.74112400 | - |
| 1.07558000 |             |             |   |
| C          | 2.31030200  | 4.17867500  |   |
| 0.02701400 |             |             |   |
| C          | -3.29696600 | 0.51968300  | - |
| 1.81119900 |             |             |   |
| C          | 0.59951000  | -4.02864800 | - |
| 0.80777000 |             |             |   |
| C          | 0.97608000  | 4.44892400  | - |
| 0.01963100 |             |             |   |
| C          | -3.04416200 | 1.83475800  | - |
| 1.56172900 |             |             |   |
| C          | -0.80701500 | -2.30510300 | - |
| 1.19208800 |             |             |   |
| C          | 2.47123400  | 2.78227100  | - |
| 0.30694200 |             |             |   |
| C          | -2.10182600 | -0.21300600 | - |
| 1.46687900 |             |             |   |

|            |             |             |   |
|------------|-------------|-------------|---|
| C          | 1.30586400  | -2.77007200 | - |
| 0.75518000 |             |             |   |
| C          | 0.31135000  | 3.22727800  | - |
| 0.40965100 |             |             |   |
| C          | -1.68642400 | 1.91887300  | - |
| 1.07940400 |             |             |   |
| H          | 1.04912200  | -5.00141900 | - |
| 0.67117100 |             |             |   |
| H          | 0.48435400  | 5.38827900  |   |
| 0.18689500 |             |             |   |
| H          | -3.70556500 | 2.67621000  | - |
| 1.70926100 |             |             |   |
| H          | -1.52692300 | -4.43357900 | - |
| 1.18486300 |             |             |   |
| H          | 3.11385800  | 4.85489300  |   |
| 0.28027000 |             |             |   |
| H          | -4.20857100 | 0.08302500  | - |
| 2.19081900 |             |             |   |
| C          | -1.93280400 | 4.31551000  | - |
| 0.51942400 |             |             |   |
| C          | -2.97975300 | 4.30657200  |   |
| 0.41829900 |             |             |   |
| C          | -1.74576300 | 5.46349600  | - |
| 1.30491200 |             |             |   |
| C          | -3.81375500 | 5.41461900  |   |
| 0.56799700 |             |             |   |
| H          | -3.13005500 | 3.42269300  |   |
| 1.03251300 |             |             |   |
| C          | -2.57975600 | 6.57269400  | - |
| 1.15554100 |             |             |   |
| H          | -0.94604300 | 5.47461200  | - |
| 2.03994300 |             |             |   |
| C          | -3.61597600 | 6.55197600  | - |
| 0.21903000 |             |             |   |
| H          | -4.61521800 | 5.38998300  |   |
| 1.30170600 |             |             |   |
| H          | -2.42411800 | 7.45080400  | - |
| 1.77680300 |             |             |   |
| H          | -4.26546900 | 7.41564600  | - |
| 0.10418900 |             |             |   |
| C          | 4.94314000  | 2.93795600  | - |
| 0.16169800 |             |             |   |
| C          | 5.30804900  | 3.90141600  | - |
| 1.11511400 |             |             |   |

|            |             |             |   |
|------------|-------------|-------------|---|
| C          | 5.75460800  | 2.77677200  |   |
| 0.97238200 |             |             |   |
| C          | 6.45412300  | 4.67858200  | - |
| 0.94200600 |             |             |   |
| H          | 4.68396700  | 4.03377800  | - |
| 1.99440000 |             |             |   |
| C          | 6.90110500  | 3.55273400  |   |
| 1.14702200 |             |             |   |
| H          | 5.47683500  | 2.03733300  |   |
| 1.71848200 |             |             |   |
| C          | 7.25473600  | 4.50628900  |   |
| 0.18952800 |             |             |   |
| H          | 6.72323800  | 5.41644000  | - |
| 1.69323700 |             |             |   |
| H          | 7.51472700  | 3.41638000  |   |
| 2.03370800 |             |             |   |
| H          | 8.14715700  | 5.11141400  |   |
| 0.32486000 |             |             |   |
| C          | 3.47777300  | -3.90325500 | - |
| 0.36787300 |             |             |   |
| C          | 4.33873800  | -4.40283200 | - |
| 1.35581100 |             |             |   |
| C          | 3.35743200  | -4.60594500 |   |
| 0.84080800 |             |             |   |
| C          | 5.06624100  | -5.57445000 | - |
| 1.13901100 |             |             |   |
| H          | 4.43135100  | -3.86573900 | - |
| 2.29571300 |             |             |   |
| C          | 4.08151500  | -5.77914600 |   |
| 1.05692000 |             |             |   |
| H          | 2.69074600  | -4.21970500 |   |
| 1.60659800 |             |             |   |
| C          | 4.93950100  | -6.26620900 |   |
| 0.06783300 |             |             |   |
| H          | 5.72738600  | -5.94983300 | - |
| 1.91569800 |             |             |   |
| H          | 3.97835000  | -6.31159900 |   |
| 1.99906600 |             |             |   |
| H          | 5.50426600  | -7.17936600 |   |
| 0.23568500 |             |             |   |
| C          | -3.21305400 | -2.40879200 | - |
| 1.81984100 |             |             |   |
| C          | -4.36806400 | -2.31357900 | - |
| 1.02653900 |             |             |   |



|            |             |             |   |
|------------|-------------|-------------|---|
| C          | -3.23140700 | -3.26754200 | - |
| 2.93106600 |             |             |   |
| C          | -5.50883300 | -3.05406200 | - |
| 1.33460900 |             |             |   |
| H          | -4.36588000 | -1.66043600 | - |
| 0.16316000 |             |             |   |
| C          | -4.37255000 | -4.00925200 | - |
| 3.23955100 |             |             |   |
| H          | -2.34456200 | -3.34387300 | - |
| 3.55393800 |             |             |   |
| C          | -5.51533900 | -3.90500500 | - |
| 2.44231200 |             |             |   |
| H          | -6.38780500 | -2.96432400 | - |
| 0.70163900 |             |             |   |
| H          | -4.37036100 | -4.66438900 | - |
| 4.10687400 |             |             |   |
| H          | -6.40367900 | -4.48283100 | - |
| 2.68375200 |             |             |   |
| N          | -1.09173400 | -1.22405400 |   |
| 1.84491000 |             |             |   |
| N          | -1.95501000 | -2.11925100 |   |
| 2.08056200 |             |             |   |
| N          | -3.11765300 | -2.19814300 |   |
| 2.12958500 |             |             |   |
| C          | 0.21977700  | -1.30150600 |   |
| 2.31087800 |             |             |   |
| C          | 0.70549500  | -2.31637600 |   |
| 3.15473100 |             |             |   |
| C          | 2.23199800  | -0.19333100 |   |
| 2.34451900 |             |             |   |
| C          | 2.02337400  | -2.22790200 |   |
| 3.58512600 |             |             |   |
| H          | 0.05984800  | -3.13654500 |   |
| 3.44917800 |             |             |   |
| C          | 2.80634600  | -1.13856200 |   |
| 3.18884200 |             |             |   |
| H          | 2.80083500  | 0.65563700  |   |
| 1.97982800 |             |             |   |
| H          | 2.43465200  | -2.99843700 |   |
| 4.23162400 |             |             |   |
| H          | 3.83742500  | -1.03434600 |   |
| 3.50831500 |             |             |   |
| N          | 0.97372500  | -0.27519000 |   |
| 1.88850300 |             |             |   |

|            |             |             |
|------------|-------------|-------------|
| C          | -3.56319700 | 0.01883000  |
| 1.87904900 |             |             |
| C          | -2.41812300 | 0.48873000  |
| 1.81531700 |             |             |
| C          | -5.00363800 | 0.05258600  |
| 1.78618000 |             |             |
| C          | -5.83076700 | -0.86462500 |
| 2.45690000 |             |             |
| C          | -5.59854800 | 1.04022700  |
| 0.97472100 |             |             |
| C          | -7.21643900 | -0.79265300 |
| 2.32036200 |             |             |
| H          | -5.37997600 | -1.63351700 |
| 3.07306600 |             |             |
| C          | -6.98295000 | 1.10076400  |
| 0.83820700 |             |             |
| H          | -4.95974800 | 1.73648500  |
| 0.44259300 |             |             |
| C          | -7.79804300 | 0.18535800  |
| 1.50989900 |             |             |
| H          | -7.84368300 | -1.50778800 |
| 2.84583500 |             |             |
| H          | -7.42595200 | 1.86330700  |
| 0.20307100 |             |             |
| H          | -8.87814200 | 0.23274400  |
| 1.40066000 |             |             |
| H          | -1.57825200 | 1.13982800  |
| 1.70757000 |             |             |

**<sup>6</sup>TS5**

|            |            |             |   |
|------------|------------|-------------|---|
| Mn         | 0.78011200 | 0.23089600  | - |
| 0.41038900 |            |             |   |
| N          | 0.93710900 | 2.33481500  | - |
| 0.60739200 |            |             |   |
| C          | 3.11152100 | -2.33750900 | - |
| 0.60170700 |            |             |   |
| C          | 3.38841500 | 2.55102200  | - |
| 0.28352700 |            |             |   |
| C          | 5.10451000 | 0.67254000  | - |
| 0.22382900 |            |             |   |
| C          | 5.02259000 | -0.68866600 | - |
| 0.28190400 |            |             |   |
| C          | 3.75902700 | 1.18844200  | - |
| 0.38844600 |            |             |   |

|            |             |             |   |
|------------|-------------|-------------|---|
| C          | 3.63189600  | -1.02415000 | - |
| 0.51721000 |             |             |   |
| H          | 5.83137500  | -1.39783900 | - |
| 0.18011200 |             |             |   |
| H          | 5.99235700  | 1.27051700  | - |
| 0.07635300 |             |             |   |
| N          | -1.21516100 | 0.39885500  | - |
| 1.11541900 |             |             |   |
| N          | 2.89997300  | 0.13599200  | - |
| 0.58660100 |             |             |   |
| N          | 0.71063800  | -1.81620200 | - |
| 0.94071500 |             |             |   |
| C          | -1.46962200 | 2.85647100  | - |
| 0.88391700 |             |             |   |
| C          | -1.69254300 | -2.00461300 | - |
| 1.51115100 |             |             |   |
| C          | -0.05353100 | -3.94240900 | - |
| 1.35443400 |             |             |   |
| C          | 1.70987700  | 4.45835100  | - |
| 0.18582300 |             |             |   |
| C          | -3.35577300 | -0.10787300 | - |
| 1.78345500 |             |             |   |
| C          | 1.28104600  | -4.03644200 | - |
| 1.08611500 |             |             |   |
| C          | 0.35605000  | 4.54219700  | - |
| 0.32965800 |             |             |   |
| C          | -3.29005900 | 1.24478600  | - |
| 1.62275100 |             |             |   |
| C          | -0.40911600 | -2.53984300 | - |
| 1.26043100 |             |             |   |
| C          | 2.07460600  | 3.06648700  | - |
| 0.36917200 |             |             |   |
| C          | -2.04390200 | -0.63799600 | - |
| 1.46912100 |             |             |   |
| C          | 1.76184200  | -2.68964200 | - |
| 0.83865100 |             |             |   |
| C          | -0.12604500 | 3.20505200  | - |
| 0.61615400 |             |             |   |
| C          | -1.94290000 | 1.55818200  | - |
| 1.18883400 |             |             |   |
| H          | 1.89204700  | -4.92784200 | - |
| 1.09101700 |             |             |   |
| H          | -0.25947800 | 5.42669200  | - |
| 0.24933000 |             |             |   |

|            |             |             |   |
|------------|-------------|-------------|---|
| H          | -4.07419600 | 1.96744800  | - |
| 1.79799100 |             |             |   |
| H          | -0.73261500 | -4.74268300 | - |
| 1.61233300 |             |             |   |
| H          | 2.39788900  | 5.26280300  |   |
| 0.03146100 |             |             |   |
| H          | -4.21002800 | -0.69316300 | - |
| 2.09138700 |             |             |   |
| C          | -2.49421800 | 3.94405400  | - |
| 0.84106000 |             |             |   |
| C          | -3.51288800 | 3.90639900  |   |
| 0.12582900 |             |             |   |
| C          | -2.47783400 | 5.00671900  | - |
| 1.75706600 |             |             |   |
| C          | -4.49081800 | 4.90017700  |   |
| 0.17306600 |             |             |   |
| H          | -3.52790900 | 3.09161600  |   |
| 0.84428900 |             |             |   |
| C          | -3.45436300 | 6.00324600  | - |
| 1.70930100 |             |             |   |
| H          | -1.69713000 | 5.03979400  | - |
| 2.51174400 |             |             |   |
| C          | -4.46457100 | 5.95239600  | - |
| 0.74576900 |             |             |   |
| H          | -5.26984600 | 4.85253900  |   |
| 0.92955700 |             |             |   |
| H          | -3.42990700 | 6.81594200  | - |
| 2.43061000 |             |             |   |
| H          | -5.22568500 | 6.72734400  | - |
| 0.71132400 |             |             |   |
| C          | 4.48602900  | 3.53951000  | - |
| 0.04177700 |             |             |   |
| C          | 4.82654700  | 4.48164500  | - |
| 1.02483200 |             |             |   |
| C          | 5.19237500  | 3.55201700  |   |
| 1.17098500 |             |             |   |
| C          | 5.84571700  | 5.40881100  | - |
| 0.80251200 |             |             |   |
| H          | 4.28429900  | 4.47851400  | - |
| 1.96616600 |             |             |   |
| C          | 6.21278100  | 4.47733400  |   |
| 1.39471400 |             |             |   |
| H          | 4.93223800  | 2.82964300  |   |
| 1.93990400 |             |             |   |

|            |             |             |   |
|------------|-------------|-------------|---|
| C          | 6.54274100  | 5.40919200  |   |
| 0.40792600 |             |             |   |
| H          | 6.09773600  | 6.12838100  | - |
| 1.57711000 |             |             |   |
| H          | 6.74601300  | 4.47383400  |   |
| 2.34186700 |             |             |   |
| H          | 7.33662200  | 6.13074600  |   |
| 0.58134000 |             |             |   |
| C          | 4.07173500  | -3.46717300 | - |
| 0.41031300 |             |             |   |
| C          | 5.10294500  | -3.71672100 | - |
| 1.32857600 |             |             |   |
| C          | 3.95015300  | -4.30646800 |   |
| 0.70888400 |             |             |   |
| C          | 5.99162900  | -4.77482000 | - |
| 1.13157500 |             |             |   |
| H          | 5.19836000  | -3.07549100 | - |
| 2.20029000 |             |             |   |
| C          | 4.83725400  | -5.36526100 |   |
| 0.90606800 |             |             |   |
| H          | 3.15355000  | -4.11501000 |   |
| 1.42278200 |             |             |   |
| C          | 5.86178100  | -5.60232300 | - |
| 0.01363300 |             |             |   |
| H          | 6.78175900  | -4.95661600 | - |
| 1.85541200 |             |             |   |
| H          | 4.73037000  | -6.00393300 |   |
| 1.77926600 |             |             |   |
| H          | 6.55293200  | -6.42702600 |   |
| 0.13866100 |             |             |   |
| C          | -2.76838500 | -2.97234500 | - |
| 1.89873900 |             |             |   |
| C          | -3.33053700 | -3.84274300 | - |
| 0.95366700 |             |             |   |
| C          | -3.23101000 | -3.02534000 | - |
| 3.22254600 |             |             |   |
| C          | -4.33153200 | -4.74292400 | - |
| 1.32279000 |             |             |   |
| H          | -2.99088900 | -3.79929000 |   |
| 0.07560100 |             |             |   |
| C          | -4.23198700 | -3.92477300 | - |
| 3.59230400 |             |             |   |
| H          | -2.79728500 | -2.35482400 | - |
| 3.95926600 |             |             |   |

|            |             |             |   |
|------------|-------------|-------------|---|
| C          | -4.78505000 | -4.78726700 | - |
| 2.64280900 |             |             |   |
| H          | -4.76143200 | -5.40477400 | - |
| 0.57547100 |             |             |   |
| H          | -4.57675000 | -3.95394800 | - |
| 4.62269500 |             |             |   |
| H          | -5.56509600 | -5.48757100 | - |
| 2.92961100 |             |             |   |
| N          | -1.06974900 | -1.24779000 |   |
| 1.87514800 |             |             |   |
| N          | -1.95283500 | -2.12460900 |   |
| 2.12746700 |             |             |   |
| N          | -3.11831200 | -2.16811900 |   |
| 2.18305000 |             |             |   |
| C          | 0.22559200  | -1.36660700 |   |
| 2.37531400 |             |             |   |
| C          | 0.63508000  | -2.34732700 |   |
| 3.29544500 |             |             |   |
| C          | 2.31081100  | -0.38262600 |   |
| 2.38639100 |             |             |   |
| C          | 1.94693700  | -2.31414300 |   |
| 3.74952500 |             |             |   |
| H          | -0.06591300 | -3.10458600 |   |
| 3.62848700 |             |             |   |
| C          | 2.80414400  | -1.30316100 |   |
| 3.30382200 |             |             |   |
| H          | 2.94136600  | 0.40097600  |   |
| 1.98199800 |             |             |   |
| H          | 2.29537100  | -3.06494000 |   |
| 4.45332500 |             |             |   |
| H          | 3.83373300  | -1.24118900 |   |
| 3.63779600 |             |             |   |
| N          | 1.05584100  | -0.41746600 |   |
| 1.90641100 |             |             |   |
| C          | -3.57392500 | -0.00818500 |   |
| 1.94225600 |             |             |   |
| C          | -2.44172500 | 0.48243400  |   |
| 1.82976900 |             |             |   |
| C          | -5.01822800 | -0.00193300 |   |
| 1.97515000 |             |             |   |
| C          | -5.74388000 | -0.77830600 |   |
| 2.89397400 |             |             |   |
| C          | -5.71631800 | 0.83039700  |   |
| 1.07963500 |             |             |   |

|            |             |             |
|------------|-------------|-------------|
| C          | -7.13568600 | -0.71306000 |
| 2.92324700 |             |             |
| H          | -5.21031700 | -1.42960500 |
| 3.57733800 |             |             |
| C          | -7.10797800 | 0.88383300  |
| 1.11031300 |             |             |
| H          | -5.15726000 | 1.41651700  |
| 0.35984800 |             |             |
| C          | -7.82299900 | 0.11526600  |
| 2.03252300 |             |             |
| H          | -7.68551800 | -1.31567000 |
| 3.64116300 |             |             |
| H          | -7.63428100 | 1.52747200  |
| 0.41044900 |             |             |
| H          | -8.90852400 | 0.15893800  |
| 2.05484900 |             |             |
| H          | -1.62255000 | 1.14968400  |
| 1.67866700 |             |             |

**cssFe (TPP)**

|            |             |             |   |
|------------|-------------|-------------|---|
| Fe         | -0.00138100 | -0.00000800 | - |
| 0.00004800 |             |             |   |
| N          | 1.41913800  | -1.41978800 |   |
| 0.00285500 |             |             |   |
| C          | -3.44964700 | -0.00095100 | - |
| 0.00026800 |             |             |   |
| C          | -0.00118300 | -3.44953000 |   |
| 0.01695200 |             |             |   |
| C          | -2.50635600 | -3.46616400 | - |
| 0.08594500 |             |             |   |
| C          | -3.46701900 | -2.50553000 | - |
| 0.07894700 |             |             |   |
| C          | -1.23298700 | -2.78900900 | - |
| 0.02971500 |             |             |   |
| C          | -2.78888100 | -1.23238700 | - |
| 0.03988700 |             |             |   |
| H          | -4.53895100 | -2.63558500 | - |
| 0.09833500 |             |             |   |
| H          | -2.63716400 | -4.53754000 | - |
| 0.12080600 |             |             |   |
| N          | 1.41836500  | 1.42054500  | - |
| 0.00285600 |             |             |   |
| N          | -1.42090700 | -1.42077500 | - |
| 0.01638100 |             |             |   |

|            |             |             |   |
|------------|-------------|-------------|---|
| N          | -1.42168800 | 1.41999600  |   |
| 0.01629400 |             |             |   |
| C          | 3.44820000  | 0.00094100  | - |
| 0.00022500 |             |             |   |
| C          | -0.00307400 | 3.44952000  | - |
| 0.01651500 |             |             |   |
| C          | -2.50828800 | 3.46476200  |   |
| 0.08612300 |             |             |   |
| C          | 2.50036000  | -3.46131900 |   |
| 0.17201000 |             |             |   |
| C          | 2.49841700  | 3.46270800  | - |
| 0.17178800 |             |             |   |
| C          | -3.46841100 | 2.50359300  |   |
| 0.07872400 |             |             |   |
| C          | 3.46102300  | -2.50050700 |   |
| 0.17106700 |             |             |   |
| C          | 3.45961700  | 2.50243200  | - |
| 0.17130200 |             |             |   |
| C          | -1.23453400 | 2.78832900  |   |
| 0.02989800 |             |             |   |
| C          | 1.23009000  | -2.78687900 |   |
| 0.05477300 |             |             |   |
| C          | 1.22854500  | 2.78753800  | - |
| 0.05453000 |             |             |   |
| C          | -2.78956500 | 1.23083600  |   |
| 0.03957100 |             |             |   |
| C          | 2.78640600  | -1.23040500 |   |
| 0.05164000 |             |             |   |
| C          | 2.78572900  | 1.23193500  | - |
| 0.05188600 |             |             |   |
| H          | -4.54042300 | 2.63304200  |   |
| 0.09798900 |             |             |   |
| H          | 4.52996200  | -2.62856500 |   |
| 0.25568600 |             |             |   |
| H          | 4.52846400  | 2.63112500  | - |
| 0.25609900 |             |             |   |
| H          | -2.63972400 | 4.53604900  |   |
| 0.12119500 |             |             |   |
| H          | 2.62827800  | -4.53023100 |   |
| 0.25765900 |             |             |   |
| H          | 2.62569000  | 4.53171500  | - |
| 0.25722500 |             |             |   |
| C          | 0.00179200  | -4.94475000 |   |
| 0.03378700 |             |             |   |



|            |             |             |   |
|------------|-------------|-------------|---|
| C          | 0.50229100  | -5.67069400 | - |
| 1.05778000 |             |             |   |
| C          | -0.49214100 | -5.65002900 |   |
| 1.14183300 |             |             |   |
| C          | 0.50815800  | -7.06619100 | - |
| 1.04271500 |             |             |   |
| H          | 0.88602300  | -5.13054400 | - |
| 1.91874500 |             |             |   |
| C          | -0.48705200 | -7.04550300 |   |
| 1.15786900 |             |             |   |
| H          | -0.87891500 | -5.09390600 |   |
| 1.99117000 |             |             |   |
| C          | 0.01319000  | -7.75775600 |   |
| 0.06535000 |             |             |   |
| H          | 0.89600600  | -7.61281100 | - |
| 1.89827700 |             |             |   |
| H          | -0.86998600 | -7.57585600 |   |
| 2.02578000 |             |             |   |
| H          | 0.01753600  | -8.84438200 |   |
| 0.07754400 |             |             |   |
| C          | 4.94294900  | 0.00134900  | - |
| 0.00048400 |             |             |   |
| C          | 5.65910600  | 0.53668100  |   |
| 1.08128800 |             |             |   |
| C          | 5.65899800  | -0.53346400 | - |
| 1.08257900 |             |             |   |
| C          | 7.05459300  | 0.53744500  |   |
| 1.08149900 |             |             |   |
| H          | 5.11105900  | 0.95075500  |   |
| 1.92294100 |             |             |   |
| C          | 7.05448900  | -0.53313800 | - |
| 1.08347000 |             |             |   |
| H          | 5.11085400  | -0.94794200 | - |
| 1.92396900 |             |             |   |
| C          | 7.75655400  | 0.00244100  | - |
| 0.00116300 |             |             |   |
| H          | 7.59313400  | 0.95225200  |   |
| 1.92949600 |             |             |   |
| H          | 7.59293800  | -0.94753100 | - |
| 1.93172700 |             |             |   |
| H          | 8.84325400  | 0.00287800  | - |
| 0.00142900 |             |             |   |
| C          | -0.00089900 | 4.94475200  | - |
| 0.03277900 |             |             |   |

|            |             |             |   |
|------------|-------------|-------------|---|
| C          | 0.49893000  | 5.67049500  |   |
| 1.05922500 |             |             |   |
| C          | -0.49512200 | 5.65023700  | - |
| 1.14056500 |             |             |   |
| C          | 0.50371800  | 7.06600500  |   |
| 1.04490700 |             |             |   |
| H          | 0.88293100  | 5.13016700  |   |
| 1.91995900 |             |             |   |
| C          | -0.49111300 | 7.04572300  | - |
| 1.15585400 |             |             |   |
| H          | -0.88131500 | 5.09428800  | - |
| 1.99028100 |             |             |   |
| C          | 0.00836300  | 7.75777800  | - |
| 0.06285500 |             |             |   |
| H          | 0.89101700  | 7.61246700  |   |
| 1.90081900 |             |             |   |
| H          | -0.87429200 | 7.57624900  | - |
| 2.02355100 |             |             |   |
| H          | 0.01183800  | 8.84441400  | - |
| 0.07445700 |             |             |   |
| C          | -4.94591300 | -0.00139400 | - |
| 0.00055000 |             |             |   |
| C          | -5.66024700 | -0.35302100 | - |
| 1.15547200 |             |             |   |
| C          | -5.66096500 | 0.34975600  |   |
| 1.15407500 |             |             |   |
| C          | -7.05602400 | -0.35468100 | - |
| 1.15604400 |             |             |   |
| H          | -5.11160600 | -0.62503900 | - |
| 2.05293400 |             |             |   |
| C          | -7.05674100 | 0.35043600  |   |
| 1.15406600 |             |             |   |
| H          | -5.11289400 | 0.62213700  |   |
| 2.05177700 |             |             |   |
| C          | -7.75822400 | -0.00236700 | - |
| 0.00113300 |             |             |   |
| H          | -7.59437000 | -0.62730700 | - |
| 2.05996100 |             |             |   |
| H          | -7.59565500 | 0.62267900  |   |
| 2.05776100 |             |             |   |
| H          | -8.84492700 | -0.00275500 | - |
| 0.00134900 |             |             |   |

<sup>oss</sup>Fe (TPP)

|            |             |             |   |
|------------|-------------|-------------|---|
| Fe         | -0.00120900 | -0.00002500 | - |
| 0.00004600 |             |             |   |
| N          | 1.43672800  | -1.39793700 | - |
| 0.00419600 |             |             |   |
| C          | -3.45030400 | -0.04919400 | - |
| 0.00009200 |             |             |   |
| C          | 0.04682000  | -3.45039200 |   |
| 0.01483900 |             |             |   |
| C          | -2.45475800 | -3.49862100 | - |
| 0.08809700 |             |             |   |
| C          | -3.42977400 | -2.55038500 | - |
| 0.07908000 |             |             |   |
| C          | -1.19289000 | -2.80503100 | - |
| 0.03035400 |             |             |   |
| C          | -2.77040100 | -1.27002000 | - |
| 0.03813200 |             |             |   |
| H          | -4.49970300 | -2.69609100 | - |
| 0.09927100 |             |             |   |
| H          | -2.57155600 | -4.57153500 | - |
| 0.12571900 |             |             |   |
| N          | 1.39629100  | 1.43830700  |   |
| 0.00411400 |             |             |   |
| N          | -1.39894700 | -1.43849500 | - |
| 0.01400300 |             |             |   |
| N          | -1.43939900 | 1.39801800  |   |
| 0.01393300 |             |             |   |
| C          | 3.44875900  | 0.04915600  | - |
| 0.00007400 |             |             |   |
| C          | -0.05155700 | 3.45030800  | - |
| 0.01478200 |             |             |   |
| C          | -2.55350900 | 3.42720700  |   |
| 0.08817900 |             |             |   |
| C          | 2.54452000  | -3.42362100 |   |
| 0.17616000 |             |             |   |
| C          | 2.44585400  | 3.49476500  | - |
| 0.17614000 |             |             |   |
| C          | -3.50109000 | 2.45155700  |   |
| 0.07907700 |             |             |   |
| C          | 3.49269900  | -2.44831600 |   |
| 0.17686400 |             |             |   |
| C          | 3.42147100  | 2.54690600  | - |
| 0.17693900 |             |             |   |
| C          | -1.27237700 | 2.76988000  |   |
| 0.03036300 |             |             |   |

|            |             |             |   |
|------------|-------------|-------------|---|
| C          | 1.26746300  | -2.76839600 |   |
| 0.05219900 |             |             |   |
| C          | 1.18801900  | 2.80337600  | - |
| 0.05222500 |             |             |   |
| C          | -2.80549100 | 1.19051800  |   |
| 0.03803900 |             |             |   |
| C          | 2.80201500  | -1.19012600 |   |
| 0.05114400 |             |             |   |
| C          | 2.76695700  | 1.26951200  | - |
| 0.05123500 |             |             |   |
| H          | -4.57473800 | 2.56669000  |   |
| 0.09934500 |             |             |   |
| H          | 4.56276400  | -2.56198300 |   |
| 0.26778300 |             |             |   |
| H          | 4.48785400  | 2.69109200  | - |
| 0.26781800 |             |             |   |
| H          | -2.70088600 | 4.49634300  |   |
| 0.12589600 |             |             |   |
| H          | 2.68783900  | -4.49020300 |   |
| 0.26653200 |             |             |   |
| H          | 2.55864900  | 4.56500900  | - |
| 0.26647900 |             |             |   |
| C          | 0.07098000  | -4.94501200 |   |
| 0.03198700 |             |             |   |
| C          | 0.58565900  | -5.66362800 | - |
| 1.05795300 |             |             |   |
| C          | -0.41648400 | -5.65706700 |   |
| 1.13868400 |             |             |   |
| C          | 0.61148500  | -7.05887500 | - |
| 1.04255300 |             |             |   |
| H          | 0.96368400  | -5.11802800 | - |
| 1.91799800 |             |             |   |
| C          | -0.39126200 | -7.05229800 |   |
| 1.15484300 |             |             |   |
| H          | -0.81316600 | -5.10638300 |   |
| 1.98698600 |             |             |   |
| C          | 0.12282700  | -7.75730200 |   |
| 0.06402800 |             |             |   |
| H          | 1.00979700  | -7.59997600 | - |
| 1.89679200 |             |             |   |
| H          | -0.76911400 | -7.58804700 |   |
| 2.02164500 |             |             |   |
| H          | 0.14279400  | -8.84374000 |   |
| 0.07640800 |             |             |   |

|            |             |             |   |
|------------|-------------|-------------|---|
| C          | 4.94288100  | 0.07046000  | - |
| 0.00024200 |             |             |   |
| C          | 5.65121000  | 0.62258300  |   |
| 1.07839700 |             |             |   |
| C          | 5.66640300  | -0.46112800 | - |
| 1.07910900 |             |             |   |
| C          | 7.04652100  | 0.64277300  |   |
| 1.07859200 |             |             |   |
| H          | 5.09725100  | 1.03328700  |   |
| 1.91781400 |             |             |   |
| C          | 7.06171700  | -0.44115100 | - |
| 1.07983000 |             |             |   |
| H          | 5.12416000  | -0.88759000 | - |
| 1.91831800 |             |             |   |
| C          | 7.75597900  | 0.11093400  | - |
| 0.00076200 |             |             |   |
| H          | 7.57911400  | 1.07004700  |   |
| 1.92412700 |             |             |   |
| H          | 7.60606400  | -0.85294100 | - |
| 1.92556200 |             |             |   |
| H          | 8.84255500  | 0.12658900  | - |
| 0.00097400 |             |             |   |
| C          | -0.07002600 | 4.94501500  | - |
| 0.03149500 |             |             |   |
| C          | 0.42375400  | 5.67764200  |   |
| 1.05878400 |             |             |   |
| C          | -0.57765400 | 5.64325600  | - |
| 1.13793000 |             |             |   |
| C          | 0.40937100  | 7.07306000  |   |
| 1.04404900 |             |             |   |
| H          | 0.81729300  | 5.14273100  |   |
| 1.91858200 |             |             |   |
| C          | -0.59263900 | 7.03864400  | - |
| 1.15342500 |             |             |   |
| H          | -0.95824000 | 5.08180100  | - |
| 1.98654800 |             |             |   |
| C          | -0.09919200 | 7.75764600  | - |
| 0.06221400 |             |             |   |
| H          | 0.79189600  | 7.62500500  |   |
| 1.89856500 |             |             |   |
| H          | -0.98569600 | 7.56369700  | - |
| 2.02000800 |             |             |   |
| H          | -0.11057600 | 8.84421400  | - |
| 0.07405800 |             |             |   |

|                             |             |             |   |
|-----------------------------|-------------|-------------|---|
| C                           | -4.94620400 | -0.07055900 | - |
| 0.00031400                  |             |             |   |
| C                           | -5.65535600 | -0.42855000 | - |
| 1.15651100                  |             |             |   |
| C                           | -5.66571200 | 0.26697900  |   |
| 1.15563700                  |             |             |   |
| C                           | -7.05098100 | -0.44969800 | - |
| 1.15690600                  |             |             |   |
| H                           | -5.10291600 | -0.68941600 | - |
| 2.05495300                  |             |             |   |
| C                           | -7.06137200 | 0.24814000  |   |
| 1.15554600                  |             |             |   |
| H                           | -5.12130000 | 0.54352400  |   |
| 2.05429200                  |             |             |   |
| C                           | -7.75784400 | -0.11082600 | - |
| 0.00080100                  |             |             |   |
| H                           | -7.58558500 | -0.72686800 | - |
| 2.06164200                  |             |             |   |
| H                           | -7.60401000 | 0.50985700  |   |
| 2.06010100                  |             |             |   |
| H                           | -8.84442700 | -0.12639500 | - |
| 0.00098400                  |             |             |   |
| <b><sup>3</sup>Fe (TPP)</b> |             |             |   |
| Fe                          | -0.00000500 | 0.00000000  | - |
| 0.00076400                  |             |             |   |
| N                           | -0.37131200 | -1.96976200 | - |
| 0.00070300                  |             |             |   |
| C                           | -1.94517700 | 2.84885500  | - |
| 0.00076100                  |             |             |   |
| C                           | -2.84885400 | -1.94517000 | - |
| 0.00010000                  |             |             |   |
| C                           | -4.27147600 | 0.11326600  | - |
| 0.00402800                  |             |             |   |
| C                           | -4.01959000 | 1.44957300  |   |
| 0.00404000                  |             |             |   |
| C                           | -2.99489100 | -0.55504500 |   |
| 0.00311200                  |             |             |   |
| C                           | -2.58730600 | 1.60729400  | - |
| 0.00382300                  |             |             |   |
| H                           | -4.73195700 | 2.26122200  |   |
| 0.01247800                  |             |             |   |
| H                           | -5.23044300 | -0.38335300 | - |
| 0.01204400                  |             |             |   |

|            |             |             |   |
|------------|-------------|-------------|---|
| N          | 1.96975100  | -0.37130800 | - |
| 0.00076400 |             |             |   |
| N          | -1.96976300 | 0.37130800  | - |
| 0.00058400 |             |             |   |
| N          | 0.37130300  | 1.96976300  | - |
| 0.00084500 |             |             |   |
| C          | 1.94516800  | -2.84885400 | - |
| 0.00078300 |             |             |   |
| C          | 2.84884200  | 1.94516900  | - |
| 0.00049600 |             |             |   |
| C          | 1.44957500  | 4.01959000  |   |
| 0.00307900 |             |             |   |
| C          | -1.44958000 | -4.01958900 |   |
| 0.00360400 |             |             |   |
| C          | 4.27146500  | -0.11326300 | - |
| 0.00438100 |             |             |   |
| C          | 0.11326800  | 4.27147400  | - |
| 0.00534000 |             |             |   |
| C          | -0.11327500 | -4.27147400 | - |
| 0.00493100 |             |             |   |
| C          | 4.01958100  | -1.44957200 |   |
| 0.00374200 |             |             |   |
| C          | 1.60729000  | 2.58730300  | - |
| 0.00412400 |             |             |   |
| C          | -1.60729900 | -2.58730300 | - |
| 0.00376400 |             |             |   |
| C          | 2.99487900  | 0.55504500  |   |
| 0.00281300 |             |             |   |
| C          | -0.55504900 | 2.99489400  |   |
| 0.00230600 |             |             |   |
| C          | 0.55504200  | -2.99489300 |   |
| 0.00246900 |             |             |   |
| C          | 2.58729600  | -1.60729200 | - |
| 0.00399500 |             |             |   |
| H          | -0.38334500 | 5.23044000  | - |
| 0.01387600 |             |             |   |
| H          | 0.38333600  | -5.23044200 | - |
| 0.01339400 |             |             |   |
| H          | 4.73194800  | -2.26122000 |   |
| 0.01215000 |             |             |   |
| H          | 2.26122500  | 4.73195600  |   |
| 0.01132600 |             |             |   |
| H          | -2.26122800 | -4.73195700 |   |
| 0.01204200 |             |             |   |

|            |             |            |   |
|------------|-------------|------------|---|
| H          | 5.23042900  | 0.38336100 | - |
| 0.01247200 |             |            |   |
| C          | 4.08415600  | 2.78864600 |   |
| 0.00015200 |             |            |   |
| C          | 4.44832700  | 3.52348500 | - |
| 1.13807900 |             |            |   |
| C          | 4.90017000  | 2.85988000 |   |
| 1.13911500 |             |            |   |
| C          | 5.60032200  | 4.31150100 | - |
| 1.13750500 |             |            |   |
| H          | 3.82077800  | 3.47073400 | - |
| 2.02339200 |             |            |   |
| C          | 6.05312100  | 3.64649700 |   |
| 1.14006900 |             |            |   |
| H          | 4.62199000  | 2.29394600 |   |
| 2.02382500 |             |            |   |
| C          | 6.40614000  | 4.37487600 |   |
| 0.00167700 |             |            |   |
| H          | 5.87006000  | 4.87245400 | - |
| 2.02842300 |             |            |   |
| H          | 6.67294800  | 3.69325000 |   |
| 2.03157800 |             |            |   |
| H          | 7.30342700  | 4.98788800 |   |
| 0.00227300 |             |            |   |
| C          | -2.78867100 | 4.08415200 | - |
| 0.00038300 |             |            |   |
| C          | -2.85946200 | 4.90074900 |   |
| 1.13819300 |             |            |   |
| C          | -3.52400400 | 4.44771800 | - |
| 1.13849200 |             |            |   |
| C          | -3.64611700 | 6.05367300 |   |
| 1.13888600 |             |            |   |
| H          | -2.29315500 | 4.62303700 |   |
| 2.02281000 |             |            |   |
| C          | -4.31205200 | 5.59969100 | - |
| 1.13818100 |             |            |   |
| H          | -3.47160600 | 3.81971600 | - |
| 2.02350300 |             |            |   |
| C          | -4.37497800 | 6.40608900 |   |
| 0.00061500 |             |            |   |
| H          | -3.69252500 | 6.67395000 |   |
| 2.03010000 |             |            |   |
| H          | -4.87338200 | 5.86895600 | - |
| 2.02900400 |             |            |   |



|            |             |             |   |
|------------|-------------|-------------|---|
| H          | -4.98801900 | 7.30335600  |   |
| 0.00100800 |             |             |   |
| C          | -4.08416200 | -2.78865300 |   |
| 0.00069900 |             |             |   |
| C          | -4.90016100 | -2.85972400 |   |
| 1.13968300 |             |             |   |
| C          | -4.44833900 | -3.52367400 | - |
| 1.13741400 |             |             |   |
| C          | -6.05310300 | -3.64635200 |   |
| 1.14077300 |             |             |   |
| H          | -4.62197400 | -2.29365300 |   |
| 2.02430400 |             |             |   |
| C          | -5.60032800 | -4.31170000 | - |
| 1.13670500 |             |             |   |
| H          | -3.82080400 | -3.47105500 | - |
| 2.02274200 |             |             |   |
| C          | -6.40613100 | -4.37490800 |   |
| 0.00249700 |             |             |   |
| H          | -6.67291700 | -3.69297700 |   |
| 2.03229800 |             |             |   |
| H          | -5.87007200 | -4.87279200 | - |
| 2.02753300 |             |             |   |
| H          | -7.30341200 | -4.98792900 |   |
| 0.00319900 |             |             |   |
| C          | 2.78867100  | -4.08414500 | - |
| 0.00043300 |             |             |   |
| C          | 3.52384200  | -4.44777900 | - |
| 1.13862500 |             |             |   |
| C          | 2.85964500  | -4.90065800 |   |
| 1.13819100 |             |             |   |
| C          | 4.31190500  | -5.59974200 | - |
| 1.13834900 |             |             |   |
| H          | 3.47130600  | -3.81984100 | - |
| 2.02367200 |             |             |   |
| C          | 3.64631500  | -6.05357100 |   |
| 1.13884900 |             |             |   |
| H          | 2.29346900  | -4.62288900 |   |
| 2.02287400 |             |             |   |
| C          | 4.37501200  | -6.40606000 |   |
| 0.00049500 |             |             |   |
| H          | 4.87310900  | -5.86906300 | - |
| 2.02923500 |             |             |   |
| H          | 3.69286600  | -6.67378200 |   |
| 2.03010100 |             |             |   |

|                             |             |             |   |
|-----------------------------|-------------|-------------|---|
| H                           | 4.98806500  | -7.30331800 |   |
| 0.00086100                  |             |             |   |
| <b><sup>5</sup>Fe (TPP)</b> |             |             |   |
| Fe                          | 0.00003400  | 0.00001300  |   |
| 0.00002100                  |             |             |   |
| N                           | -2.08130600 | 0.00012900  | - |
| 0.04388100                  |             |             |   |
| C                           | 2.45802000  | -2.44587700 | - |
| 0.00928100                  |             |             |   |
| C                           | -2.45829900 | -2.44552300 |   |
| 0.00930400                  |             |             |   |
| C                           | -0.68269700 | -4.24595000 | - |
| 0.00479700                  |             |             |   |
| C                           | 0.68215000  | -4.24604800 |   |
| 0.00540400                  |             |             |   |
| C                           | -1.11215500 | -2.86864400 |   |
| 0.00329700                  |             |             |   |
| C                           | 1.11182300  | -2.86880100 | - |
| 0.00316300                  |             |             |   |
| H                           | 1.33840600  | -5.10386500 |   |
| 0.01654300                  |             |             |   |
| H                           | -1.33910900 | -5.10364800 | - |
| 0.01559100                  |             |             |   |
| N                           | 0.00016000  | 2.05077800  |   |
| 0.00003700                  |             |             |   |
| N                           | -0.00011300 | -2.05077800 | - |
| 0.00009000                  |             |             |   |
| N                           | 2.08137300  | -0.00013200 |   |
| 0.04389000                  |             |             |   |
| C                           | -2.45798900 | 2.44586000  |   |
| 0.00933800                  |             |             |   |
| C                           | 2.45836000  | 2.44553900  | - |
| 0.00931400                  |             |             |   |
| C                           | 4.27750800  | 0.68015200  | - |
| 0.09471300                  |             |             |   |
| C                           | -4.27747600 | -0.68019200 |   |
| 0.09415600                  |             |             |   |
| C                           | 0.68273500  | 4.24594400  |   |
| 0.00529600                  |             |             |   |
| C                           | 4.27741500  | -0.68071400 | - |
| 0.09474100                  |             |             |   |
| C                           | -4.27739700 | 0.68067300  |   |
| 0.09419300                  |             |             |   |

|            |             |             |   |
|------------|-------------|-------------|---|
| C          | -0.68211600 | 4.24603700  | - |
| 0.00484800 |             |             |   |
| C          | 2.89418000  | 1.10640900  | - |
| 0.00424300 |             |             |   |
| C          | -2.89411600 | -1.10641400 |   |
| 0.00406800 |             |             |   |
| C          | 1.11220400  | 2.86864600  | - |
| 0.00313900 |             |             |   |
| C          | 2.89402200  | -1.10678900 | - |
| 0.00422300 |             |             |   |
| C          | -2.89398100 | 1.10677100  |   |
| 0.00408000 |             |             |   |
| C          | -1.11178600 | 2.86879200  |   |
| 0.00337600 |             |             |   |
| H          | 5.12933000  | -1.34089100 | - |
| 0.16819100 |             |             |   |
| H          | -5.12934100 | 1.34084000  |   |
| 0.16740200 |             |             |   |
| H          | -1.33836300 | 5.10386200  | - |
| 0.01574500 |             |             |   |
| H          | 5.12951300  | 1.34022200  | - |
| 0.16812900 |             |             |   |
| H          | -5.12948200 | -1.34030000 |   |
| 0.16728500 |             |             |   |
| H          | 1.33912500  | 5.10365500  |   |
| 0.01631700 |             |             |   |
| C          | -3.51262300 | -3.50664900 |   |
| 0.03335500 |             |             |   |
| C          | -4.37322600 | -3.68291900 | - |
| 1.06115500 |             |             |   |
| C          | -3.66706200 | -4.34105200 |   |
| 1.15133800 |             |             |   |
| C          | -5.36127000 | -4.66825700 | - |
| 1.03956200 |             |             |   |
| H          | -4.25909200 | -3.04077600 | - |
| 1.92998900 |             |             |   |
| C          | -4.65422200 | -5.32717000 |   |
| 1.17368300 |             |             |   |
| H          | -3.00740900 | -4.20736700 |   |
| 2.00410500 |             |             |   |
| C          | -5.50444000 | -5.49383300 |   |
| 0.07798200 |             |             |   |
| H          | -6.01638700 | -4.79330900 | - |
| 1.89769600 |             |             |   |

|            |             |             |   |
|------------|-------------|-------------|---|
| H          | -4.76216500 | -5.96169000 |   |
| 2.04942800 |             |             |   |
| H          | -6.27356800 | -6.26132400 |   |
| 0.09521700 |             |             |   |
| C          | -3.51217700 | 3.50710500  |   |
| 0.03339400 |             |             |   |
| C          | -4.37293900 | 3.68333400  | - |
| 1.06101500 |             |             |   |
| C          | -3.66640000 | 4.34167200  |   |
| 1.15128800 |             |             |   |
| C          | -5.36094400 | 4.66870200  | - |
| 1.03937500 |             |             |   |
| H          | -4.25894600 | 3.04111800  | - |
| 1.92981400 |             |             |   |
| C          | -4.65352500 | 5.32782200  |   |
| 1.17368200 |             |             |   |
| H          | -3.00661800 | 4.20806300  |   |
| 2.00396700 |             |             |   |
| C          | -5.50392600 | 5.49439200  |   |
| 0.07811300 |             |             |   |
| H          | -6.01617400 | 4.79369500  | - |
| 1.89743200 |             |             |   |
| H          | -4.76130200 | 5.96243400  |   |
| 2.04938100 |             |             |   |
| H          | -6.27304300 | 6.26189200  |   |
| 0.09540400 |             |             |   |
| C          | 3.51217900  | -3.50715000 | - |
| 0.03332000 |             |             |   |
| C          | 4.37324700  | -3.68308800 |   |
| 1.06089600 |             |             |   |
| C          | 3.66601800  | -4.34207500 | - |
| 1.15100100 |             |             |   |
| C          | 5.36120200  | -4.66850600 |   |
| 1.03926000 |             |             |   |
| H          | 4.25953800  | -3.04059800 |   |
| 1.92952700 |             |             |   |
| C          | 4.65309700  | -5.32827100 | - |
| 1.17339000 |             |             |   |
| H          | 3.00597300  | -4.20870800 | - |
| 2.00351200 |             |             |   |
| C          | 5.50381800  | -5.49453700 | - |
| 0.07802200 |             |             |   |
| H          | 6.01667900  | -4.79327700 |   |
| 1.89716100 |             |             |   |

|            |             |             |   |
|------------|-------------|-------------|---|
| H          | 4.76059200  | -5.96315800 | - |
| 2.04892300 |             |             |   |
| H          | 6.27289500  | -6.26207800 | - |
| 0.09530300 |             |             |   |
| C          | 3.51264200  | 3.50668700  | - |
| 0.03341100 |             |             |   |
| C          | 3.66654400  | 4.34157000  | - |
| 1.15111800 |             |             |   |
| C          | 4.37371600  | 3.68259300  |   |
| 1.06079800 |             |             |   |
| C          | 4.65365300  | 5.32773400  | - |
| 1.17351100 |             |             |   |
| H          | 3.00651100  | 4.20820300  | - |
| 2.00364000 |             |             |   |
| C          | 5.36170500  | 4.66798000  |   |
| 1.03915900 |             |             |   |
| H          | 4.25998000  | 3.04011400  |   |
| 1.92943600 |             |             |   |
| C          | 5.50435600  | 5.49399800  | - |
| 0.07812600 |             |             |   |
| H          | 4.76117800  | 5.96260300  | - |
| 2.04905400 |             |             |   |
| H          | 6.01718400  | 4.79272700  |   |
| 1.89706100 |             |             |   |
| H          | 6.27344200  | 6.26152900  | - |
| 0.09539700 |             |             |   |
| <b>CSS</b> |             |             |   |
| <b>TS6</b> |             |             |   |
| Fe         | -0.33030200 | 0.06281800  | - |
| 0.45822200 |             |             |   |
| N          | -1.89443300 | 1.32931500  | - |
| 0.36128200 |             |             |   |
| C          | 0.01409300  | -3.36721000 | - |
| 0.69498200 |             |             |   |
| C          | -3.75095800 | -0.29330600 | - |
| 0.12939900 |             |             |   |
| C          | -3.46460500 | -2.79313800 |   |
| 0.04944500 |             |             |   |
| C          | -2.41207700 | -3.65458400 | - |
| 0.13037100 |             |             |   |
| C          | -2.95560800 | -1.47231300 | - |
| 0.16774700 |             |             |   |
| C          | -1.27435400 | -2.85616400 | - |
| 0.44627300 |             |             |   |

|            |             |             |   |
|------------|-------------|-------------|---|
| H          | -2.41570400 | -4.73059200 | - |
| 0.03827100 |             |             |   |
| H          | -4.48227700 | -3.03758000 |   |
| 0.31347600 |             |             |   |
| N          | 0.94091900  | 1.63298700  | - |
| 0.63509200 |             |             |   |
| N          | -1.61215200 | -1.50778000 | - |
| 0.44167300 |             |             |   |
| N          | 1.21915000  | -1.20303300 | - |
| 0.76930800 |             |             |   |
| C          | -0.70016500 | 3.49610900  | - |
| 0.46386900 |             |             |   |
| C          | 3.09532100  | 0.41241000  | - |
| 0.83098300 |             |             |   |
| C          | 3.32292400  | -2.06591800 | - |
| 1.19903300 |             |             |   |
| C          | -4.04269900 | 2.19109100  | - |
| 0.39722200 |             |             |   |
| C          | 2.86212600  | 2.90151600  | - |
| 0.50530400 |             |             |   |
| C          | 2.45987300  | -3.12022200 | - |
| 1.17495400 |             |             |   |
| C          | -3.19279700 | 3.24857700  | - |
| 0.50228200 |             |             |   |
| C          | 1.79656000  | 3.76422200  | - |
| 0.38994200 |             |             |   |
| C          | 2.54554700  | -0.88223300 | - |
| 0.92357400 |             |             |   |
| C          | -3.22590400 | 1.00526600  | - |
| 0.28605300 |             |             |   |
| C          | 2.31389100  | 1.59288200  | - |
| 0.67600400 |             |             |   |
| C          | 1.15808200  | -2.59045800 | - |
| 0.88283400 |             |             |   |
| C          | -1.85616000 | 2.72018400  | - |
| 0.45287300 |             |             |   |
| C          | 0.61515100  | 2.97760400  | - |
| 0.49109300 |             |             |   |
| H          | 2.68266900  | -4.16283400 | - |
| 1.34736900 |             |             |   |
| H          | -3.44605800 | 4.29217400  | - |
| 0.61661300 |             |             |   |
| H          | 1.82748000  | 4.83437200  | - |
| 0.24715800 |             |             |   |

|            |             |             |   |
|------------|-------------|-------------|---|
| H          | 4.38326400  | -2.08039300 | - |
| 1.40161400 |             |             |   |
| H          | -5.12208400 | 2.20327900  | - |
| 0.41158800 |             |             |   |
| H          | 3.91367100  | 3.14220000  | - |
| 0.46786800 |             |             |   |
| N          | 0.08905600  | -0.37432500 |   |
| 1.95189800 |             |             |   |
| N          | -0.04432100 | -1.65326500 |   |
| 2.18757600 |             |             |   |
| N          | 0.64038300  | -2.46849100 |   |
| 2.67718600 |             |             |   |
| C          | 1.36424100  | -0.04256200 |   |
| 2.45284400 |             |             |   |
| C          | 1.86187500  | 1.27245600  |   |
| 2.38868100 |             |             |   |
| C          | 3.31482200  | -0.82786900 |   |
| 3.45736400 |             |             |   |
| C          | 3.14051200  | 1.49409400  |   |
| 2.86878400 |             |             |   |
| H          | 1.26048400  | 2.05613400  |   |
| 1.94607600 |             |             |   |
| C          | 3.88930800  | 0.43335600  |   |
| 3.41345800 |             |             |   |
| H          | 3.82631400  | -1.69298000 |   |
| 3.86877700 |             |             |   |
| H          | 3.56797800  | 2.48979900  |   |
| 2.80722100 |             |             |   |
| H          | 4.89485900  | 0.58820100  |   |
| 3.78924700 |             |             |   |
| N          | 2.07756100  | -1.03037000 |   |
| 2.98108100 |             |             |   |
| C          | -0.85118700 | 4.97912000  | - |
| 0.44082300 |             |             |   |
| C          | -1.47146400 | 5.61816700  |   |
| 0.64449800 |             |             |   |
| C          | -0.37136200 | 5.76220400  | - |
| 1.50316100 |             |             |   |
| C          | -1.60739900 | 7.00658700  |   |
| 0.66768700 |             |             |   |
| H          | -1.84138400 | 5.01645600  |   |
| 1.46943000 |             |             |   |
| C          | -0.51820400 | 7.14897600  | - |
| 1.48447400 |             |             |   |

|            |             |             |   |
|------------|-------------|-------------|---|
| H          | 0.11101900  | 5.27218200  | - |
| 2.34353000 |             |             |   |
| C          | -1.13397300 | 7.77551100  | - |
| 0.39783000 |             |             |   |
| H          | -2.08261500 | 7.48698100  |   |
| 1.51877400 |             |             |   |
| H          | -0.15247500 | 7.74032300  | - |
| 2.31961000 |             |             |   |
| H          | -1.24384700 | 8.85650600  | - |
| 0.38186500 |             |             |   |
| C          | -5.21736400 | -0.44016600 |   |
| 0.06773700 |             |             |   |
| C          | -5.85557100 | 0.15545200  |   |
| 1.16942400 |             |             |   |
| C          | -5.99870500 | -1.17282500 | - |
| 0.84277400 |             |             |   |
| C          | -7.23123600 | 0.02118800  |   |
| 1.35620700 |             |             |   |
| H          | -5.25953300 | 0.72055900  |   |
| 1.88018000 |             |             |   |
| C          | -7.37506400 | -1.30135900 | - |
| 0.65954500 |             |             |   |
| H          | -5.51537300 | -1.63560700 | - |
| 1.69813900 |             |             |   |
| C          | -7.99640000 | -0.70640300 |   |
| 0.44157700 |             |             |   |
| H          | -7.70493500 | 0.48223700  |   |
| 2.21894300 |             |             |   |
| H          | -7.96359700 | -1.86379500 | - |
| 1.37964500 |             |             |   |
| H          | -9.06858300 | -0.80937800 |   |
| 0.58563300 |             |             |   |
| C          | 0.17140700  | -4.84973800 | - |
| 0.71308200 |             |             |   |
| C          | 0.93440400  | -5.48940900 |   |
| 0.27635900 |             |             |   |
| C          | -0.44745000 | -5.62553700 | - |
| 1.70482000 |             |             |   |
| C          | 1.07592600  | -6.87734100 |   |
| 0.27126900 |             |             |   |
| H          | 1.39963300  | -4.88861500 |   |
| 1.05227100 |             |             |   |
| C          | -0.29481400 | -7.01227200 | - |
| 1.71490900 |             |             |   |



|                |             |             |   |
|----------------|-------------|-------------|---|
| H              | -1.04310600 | -5.13193500 | - |
| 2.46704600     |             |             |   |
| C              | 0.46570900  | -7.64167400 | - |
| 0.72624500     |             |             |   |
| H              | 1.66106000  | -7.36166900 |   |
| 1.04849500     |             |             |   |
| H              | -0.77023600 | -7.60089200 | - |
| 2.49494600     |             |             |   |
| H              | 0.58003100  | -8.72236500 | - |
| 0.73201100     |             |             |   |
| C              | 4.57462600  | 0.55348600  | - |
| 0.87292800     |             |             |   |
| C              | 5.37593900  | -0.06563700 |   |
| 0.10227700     |             |             |   |
| C              | 5.20585900  | 1.30943000  | - |
| 1.87554300     |             |             |   |
| C              | 6.76379200  | 0.06968000  |   |
| 0.07771300     |             |             |   |
| H              | 4.89585300  | -0.64637200 |   |
| 0.88358400     |             |             |   |
| C              | 6.59418500  | 1.44057900  | - |
| 1.90301900     |             |             |   |
| H              | 4.59617600  | 1.78940400  | - |
| 2.63541800     |             |             |   |
| C              | 7.37865300  | 0.82298000  | - |
| 0.92542900     |             |             |   |
| H              | 7.36573200  | -0.41197400 |   |
| 0.84422000     |             |             |   |
| H              | 7.06429000  | 2.02199900  | - |
| 2.69182700     |             |             |   |
| H              | 8.46018300  | 0.92693300  | - |
| 0.94644800     |             |             |   |
| <b>oss-TS6</b> |             |             |   |
| Fe             | -0.33030200 | 0.06281800  | - |
| 0.45822200     |             |             |   |
| N              | -1.89443300 | 1.32931500  | - |
| 0.36128200     |             |             |   |
| C              | 0.01409300  | -3.36721000 | - |
| 0.69498200     |             |             |   |
| C              | -3.75095800 | -0.29330600 | - |
| 0.12939900     |             |             |   |
| C              | -3.46460500 | -2.79313800 |   |
| 0.04944500     |             |             |   |

|            |             |             |   |
|------------|-------------|-------------|---|
| C          | -2.41207700 | -3.65458400 | - |
| 0.13037100 |             |             |   |
| C          | -2.95560800 | -1.47231300 | - |
| 0.16774700 |             |             |   |
| C          | -1.27435400 | -2.85616400 | - |
| 0.44627300 |             |             |   |
| H          | -2.41570400 | -4.73059200 | - |
| 0.03827100 |             |             |   |
| H          | -4.48227700 | -3.03758000 |   |
| 0.31347600 |             |             |   |
| N          | 0.94091900  | 1.63298700  | - |
| 0.63509200 |             |             |   |
| N          | -1.61215200 | -1.50778000 | - |
| 0.44167300 |             |             |   |
| N          | 1.21915000  | -1.20303300 | - |
| 0.76930800 |             |             |   |
| C          | -0.70016500 | 3.49610900  | - |
| 0.46386900 |             |             |   |
| C          | 3.09532100  | 0.41241000  | - |
| 0.83098300 |             |             |   |
| C          | 3.32292400  | -2.06591800 | - |
| 1.19903300 |             |             |   |
| C          | -4.04269900 | 2.19109100  | - |
| 0.39722200 |             |             |   |
| C          | 2.86212600  | 2.90151600  | - |
| 0.50530400 |             |             |   |
| C          | 2.45987300  | -3.12022200 | - |
| 1.17495400 |             |             |   |
| C          | -3.19279700 | 3.24857700  | - |
| 0.50228200 |             |             |   |
| C          | 1.79656000  | 3.76422200  | - |
| 0.38994200 |             |             |   |
| C          | 2.54554700  | -0.88223300 | - |
| 0.92357400 |             |             |   |
| C          | -3.22590400 | 1.00526600  | - |
| 0.28605300 |             |             |   |
| C          | 2.31389100  | 1.59288200  | - |
| 0.67600400 |             |             |   |
| C          | 1.15808200  | -2.59045800 | - |
| 0.88283400 |             |             |   |
| C          | -1.85616000 | 2.72018400  | - |
| 0.45287300 |             |             |   |
| C          | 0.61515100  | 2.97760400  | - |
| 0.49109300 |             |             |   |

|            |             |             |   |
|------------|-------------|-------------|---|
| H          | 2.68266900  | -4.16283400 | - |
| 1.34736900 |             |             |   |
| H          | -3.44605800 | 4.29217400  | - |
| 0.61661300 |             |             |   |
| H          | 1.82748000  | 4.83437200  | - |
| 0.24715800 |             |             |   |
| H          | 4.38326400  | -2.08039300 | - |
| 1.40161400 |             |             |   |
| H          | -5.12208400 | 2.20327900  | - |
| 0.41158800 |             |             |   |
| H          | 3.91367100  | 3.14220000  | - |
| 0.46786800 |             |             |   |
| N          | 0.08905600  | -0.37432500 |   |
| 1.95189800 |             |             |   |
| N          | -0.04432100 | -1.65326500 |   |
| 2.18757600 |             |             |   |
| N          | 0.64038300  | -2.46849100 |   |
| 2.67718600 |             |             |   |
| C          | 1.36424100  | -0.04256200 |   |
| 2.45284400 |             |             |   |
| C          | 1.86187500  | 1.27245600  |   |
| 2.38868100 |             |             |   |
| C          | 3.31482200  | -0.82786900 |   |
| 3.45736400 |             |             |   |
| C          | 3.14051200  | 1.49409400  |   |
| 2.86878400 |             |             |   |
| H          | 1.26048400  | 2.05613400  |   |
| 1.94607600 |             |             |   |
| C          | 3.88930800  | 0.43335600  |   |
| 3.41345800 |             |             |   |
| H          | 3.82631400  | -1.69298000 |   |
| 3.86877700 |             |             |   |
| H          | 3.56797800  | 2.48979900  |   |
| 2.80722100 |             |             |   |
| H          | 4.89485900  | 0.58820100  |   |
| 3.78924700 |             |             |   |
| N          | 2.07756100  | -1.03037000 |   |
| 2.98108100 |             |             |   |
| C          | -0.85118700 | 4.97912000  | - |
| 0.44082300 |             |             |   |
| C          | -1.47146400 | 5.61816700  |   |
| 0.64449800 |             |             |   |
| C          | -0.37136200 | 5.76220400  | - |
| 1.50316100 |             |             |   |

|            |             |             |   |
|------------|-------------|-------------|---|
| C          | -1.60739900 | 7.00658700  |   |
| 0.66768700 |             |             |   |
| H          | -1.84138400 | 5.01645600  |   |
| 1.46943000 |             |             |   |
| C          | -0.51820400 | 7.14897600  | - |
| 1.48447400 |             |             |   |
| H          | 0.11101900  | 5.27218200  | - |
| 2.34353000 |             |             |   |
| C          | -1.13397300 | 7.77551100  | - |
| 0.39783000 |             |             |   |
| H          | -2.08261500 | 7.48698100  |   |
| 1.51877400 |             |             |   |
| H          | -0.15247500 | 7.74032300  | - |
| 2.31961000 |             |             |   |
| H          | -1.24384700 | 8.85650600  | - |
| 0.38186500 |             |             |   |
| C          | -5.21736400 | -0.44016600 |   |
| 0.06773700 |             |             |   |
| C          | -5.85557100 | 0.15545200  |   |
| 1.16942400 |             |             |   |
| C          | -5.99870500 | -1.17282500 | - |
| 0.84277400 |             |             |   |
| C          | -7.23123600 | 0.02118800  |   |
| 1.35620700 |             |             |   |
| H          | -5.25953300 | 0.72055900  |   |
| 1.88018000 |             |             |   |
| C          | -7.37506400 | -1.30135900 | - |
| 0.65954500 |             |             |   |
| H          | -5.51537300 | -1.63560700 | - |
| 1.69813900 |             |             |   |
| C          | -7.99640000 | -0.70640300 |   |
| 0.44157700 |             |             |   |
| H          | -7.70493500 | 0.48223700  |   |
| 2.21894300 |             |             |   |
| H          | -7.96359700 | -1.86379500 | - |
| 1.37964500 |             |             |   |
| H          | -9.06858300 | -0.80937800 |   |
| 0.58563300 |             |             |   |
| C          | 0.17140700  | -4.84973800 | - |
| 0.71308200 |             |             |   |
| C          | 0.93440400  | -5.48940900 |   |
| 0.27635900 |             |             |   |
| C          | -0.44745000 | -5.62553700 | - |
| 1.70482000 |             |             |   |

|                        |             |             |   |
|------------------------|-------------|-------------|---|
| C                      | 1.07592600  | -6.87734100 |   |
| 0.27126900             |             |             |   |
| H                      | 1.39963300  | -4.88861500 |   |
| 1.05227100             |             |             |   |
| C                      | -0.29481400 | -7.01227200 | - |
| 1.71490900             |             |             |   |
| H                      | -1.04310600 | -5.13193500 | - |
| 2.46704600             |             |             |   |
| C                      | 0.46570900  | -7.64167400 | - |
| 0.72624500             |             |             |   |
| H                      | 1.66106000  | -7.36166900 |   |
| 1.04849500             |             |             |   |
| H                      | -0.77023600 | -7.60089200 | - |
| 2.49494600             |             |             |   |
| H                      | 0.58003100  | -8.72236500 | - |
| 0.73201100             |             |             |   |
| C                      | 4.57462600  | 0.55348600  | - |
| 0.87292800             |             |             |   |
| C                      | 5.37593900  | -0.06563700 |   |
| 0.10227700             |             |             |   |
| C                      | 5.20585900  | 1.30943000  | - |
| 1.87554300             |             |             |   |
| C                      | 6.76379200  | 0.06968000  |   |
| 0.07771300             |             |             |   |
| H                      | 4.89585300  | -0.64637200 |   |
| 0.88358400             |             |             |   |
| C                      | 6.59418500  | 1.44057900  | - |
| 1.90301900             |             |             |   |
| H                      | 4.59617600  | 1.78940400  | - |
| 2.63541800             |             |             |   |
| C                      | 7.37865300  | 0.82298000  | - |
| 0.92542900             |             |             |   |
| H                      | 7.36573200  | -0.41197400 |   |
| 0.84422000             |             |             |   |
| H                      | 7.06429000  | 2.02199900  | - |
| 2.69182700             |             |             |   |
| H                      | 8.46018300  | 0.92693300  | - |
| 0.94644800             |             |             |   |
| <b><sup>3</sup>TS6</b> |             |             |   |
| Fe                     | -0.33226400 | 0.08293100  | - |
| 0.46410700             |             |             |   |
| N                      | -1.88496500 | 1.34744600  | - |
| 0.33746300             |             |             |   |

|            |             |             |   |
|------------|-------------|-------------|---|
| C          | 0.01366000  | -3.34075800 | - |
| 0.51873000 |             |             |   |
| C          | -3.76448100 | -0.26387700 | - |
| 0.32415500 |             |             |   |
| C          | -3.51795900 | -2.75644500 | - |
| 0.19430800 |             |             |   |
| C          | -2.46282800 | -3.61241800 | - |
| 0.22880500 |             |             |   |
| C          | -2.98200000 | -1.42397800 | - |
| 0.34064300 |             |             |   |
| C          | -1.27585800 | -2.81114800 | - |
| 0.41140100 |             |             |   |
| H          | -2.47528900 | -4.68807200 | - |
| 0.13235300 |             |             |   |
| H          | -4.56330400 | -2.99350000 | - |
| 0.06275300 |             |             |   |
| N          | 0.93388200  | 1.63878600  | - |
| 0.62976100 |             |             |   |
| N          | -1.60844000 | -1.47363400 | - |
| 0.45807000 |             |             |   |
| N          | 1.21789300  | -1.18269600 | - |
| 0.70198100 |             |             |   |
| C          | -0.66161500 | 3.49951400  | - |
| 0.26380100 |             |             |   |
| C          | 3.07394800  | 0.43213200  | - |
| 0.97017000 |             |             |   |
| C          | 3.32155200  | -2.06261900 | - |
| 1.10477900 |             |             |   |
| C          | -4.02500100 | 2.23168500  | - |
| 0.32990600 |             |             |   |
| C          | 2.86779000  | 2.90886000  | - |
| 0.65310500 |             |             |   |
| C          | 2.47130800  | -3.11181700 | - |
| 0.94753900 |             |             |   |
| C          | -3.15936600 | 3.27821900  | - |
| 0.28302400 |             |             |   |
| C          | 1.83209800  | 3.75927200  | - |
| 0.41302300 |             |             |   |
| C          | 2.54145200  | -0.86081300 | - |
| 0.93137600 |             |             |   |
| C          | -3.22771500 | 1.02829000  | - |
| 0.33895900 |             |             |   |
| C          | 2.30529100  | 1.58892800  | - |
| 0.79057900 |             |             |   |

|            |             |             |   |
|------------|-------------|-------------|---|
| C          | 1.16175800  | -2.55997100 | - |
| 0.69690900 |             |             |   |
| C          | -1.82600600 | 2.72301100  | - |
| 0.28199200 |             |             |   |
| C          | 0.62514900  | 2.96901500  | - |
| 0.42516100 |             |             |   |
| H          | 2.69496600  | -4.16631300 | - |
| 1.01634700 |             |             |   |
| H          | -3.39151300 | 4.33303500  | - |
| 0.27358800 |             |             |   |
| H          | 1.87511300  | 4.82503300  | - |
| 0.24318500 |             |             |   |
| H          | 4.37762100  | -2.09104600 | - |
| 1.32833400 |             |             |   |
| H          | -5.10396200 | 2.26189200  | - |
| 0.36253500 |             |             |   |
| H          | 3.91997200  | 3.14486500  | - |
| 0.71255900 |             |             |   |
| N          | 0.04836300  | -0.28600300 |   |
| 2.07117800 |             |             |   |
| N          | -0.22344300 | -1.53309900 |   |
| 2.34722500 |             |             |   |
| N          | 0.39171300  | -2.42275000 |   |
| 2.80138900 |             |             |   |
| C          | 1.38961400  | -0.11264600 |   |
| 2.46322500 |             |             |   |
| C          | 2.03476300  | 1.13308600  |   |
| 2.34231100 |             |             |   |
| C          | 3.30472900  | -1.12151000 |   |
| 3.32523700 |             |             |   |
| C          | 3.36258400  | 1.20348600  |   |
| 2.72274300 |             |             |   |
| H          | 1.49581400  | 1.98101600  |   |
| 1.94017400 |             |             |   |
| C          | 4.01954100  | 0.06214700  |   |
| 3.22344400 |             |             |   |
| H          | 3.74085300  | -2.03982700 |   |
| 3.70695300 |             |             |   |
| H          | 3.89977300  | 2.14124800  |   |
| 2.62028900 |             |             |   |
| H          | 5.06073700  | 0.09860400  |   |
| 3.52558500 |             |             |   |
| N          | 2.01832700  | -1.17612400 |   |
| 2.95024800 |             |             |   |

|            |             |             |   |
|------------|-------------|-------------|---|
| C          | -0.80546900 | 4.97651300  | - |
| 0.09096700 |             |             |   |
| C          | -1.31189700 | 5.50567500  |   |
| 1.10662400 |             |             |   |
| C          | -0.44662500 | 5.86309000  | - |
| 1.11850900 |             |             |   |
| C          | -1.45219800 | 6.88391900  |   |
| 1.27428200 |             |             |   |
| H          | -1.59448500 | 4.82478300  |   |
| 1.90466800 |             |             |   |
| C          | -0.58653900 | 7.24148800  | - |
| 0.95189700 |             |             |   |
| H          | -0.06097100 | 5.46035000  | - |
| 2.05079300 |             |             |   |
| C          | -1.08913200 | 7.75627400  |   |
| 0.24551500 |             |             |   |
| H          | -1.84250700 | 7.27609800  |   |
| 2.20976800 |             |             |   |
| H          | -0.30842200 | 7.91286100  | - |
| 1.76008600 |             |             |   |
| H          | -1.19874300 | 8.82964700  |   |
| 0.37523500 |             |             |   |
| C          | -5.24964800 | -0.41706200 | - |
| 0.26138900 |             |             |   |
| C          | -5.96814800 | 0.00257500  |   |
| 0.86896600 |             |             |   |
| C          | -5.95377400 | -0.99090600 | - |
| 1.33129400 |             |             |   |
| C          | -7.35452100 | -0.14536200 |   |
| 0.92716800 |             |             |   |
| H          | -5.42831200 | 0.44307600  |   |
| 1.70240900 |             |             |   |
| C          | -7.34021000 | -1.13924900 | - |
| 1.27404500 |             |             |   |
| H          | -5.40353500 | -1.31818000 | - |
| 2.20902300 |             |             |   |
| C          | -8.04486800 | -0.71655000 | - |
| 0.14450000 |             |             |   |
| H          | -7.89457700 | 0.18108700  |   |
| 1.81206300 |             |             |   |
| H          | -7.86999900 | -1.58163300 | - |
| 2.11360900 |             |             |   |
| H          | -9.12450800 | -0.83205800 | - |
| 0.09938300 |             |             |   |



|            |             |             |   |
|------------|-------------|-------------|---|
| C          | 0.18382800  | -4.82296900 | - |
| 0.43221400 |             |             |   |
| C          | 0.82506900  | -5.39227200 |   |
| 0.67888300 |             |             |   |
| C          | -0.28615300 | -5.66735000 | - |
| 1.44900400 |             |             |   |
| C          | 0.99144000  | -6.77491000 |   |
| 0.76963000 |             |             |   |
| H          | 1.17908700  | -4.73998700 |   |
| 1.47182700 |             |             |   |
| C          | -0.11887800 | -7.05010500 | - |
| 1.35831200 |             |             |   |
| H          | -0.78082100 | -5.22983300 | - |
| 2.31174100 |             |             |   |
| C          | 0.52094600  | -7.60755600 | - |
| 0.24870900 |             |             |   |
| H          | 1.48464200  | -7.20230300 |   |
| 1.63885300 |             |             |   |
| H          | -0.48453500 | -7.69106800 | - |
| 2.15629900 |             |             |   |
| H          | 0.65120500  | -8.68419800 | - |
| 0.17786100 |             |             |   |
| C          | 4.54653900  | 0.59242600  | - |
| 1.16230500 |             |             |   |
| C          | 5.45226500  | 0.10741700  | - |
| 0.20518900 |             |             |   |
| C          | 5.05421600  | 1.24378000  | - |
| 2.29728900 |             |             |   |
| C          | 6.82735100  | 0.26857400  | - |
| 0.37891900 |             |             |   |
| H          | 5.06529500  | -0.39274000 |   |
| 0.67711200 |             |             |   |
| C          | 6.42933000  | 1.40616000  | - |
| 2.47126800 |             |             |   |
| H          | 4.35965800  | 1.62051300  | - |
| 3.04279000 |             |             |   |
| C          | 7.32073400  | 0.91910900  | - |
| 1.51237600 |             |             |   |
| H          | 7.51393200  | -0.11101700 |   |
| 0.37365300 |             |             |   |
| H          | 6.80436600  | 1.90900200  | - |
| 3.35879000 |             |             |   |
| H          | 8.39160400  | 1.04485000  | - |
| 1.64800100 |             |             |   |

**<sup>5</sup>TS6**

|            |             |             |   |
|------------|-------------|-------------|---|
| Fe         | -0.31446500 | 0.08329600  | - |
| 0.34425000 |             |             |   |
| N          | -1.78384400 | 1.52405200  | - |
| 0.30499500 |             |             |   |
| C          | -0.31564800 | -3.37686800 | - |
| 0.64207100 |             |             |   |
| C          | -3.77957200 | 0.04345700  | - |
| 0.18450000 |             |             |   |
| C          | -3.79166000 | -2.49916400 | - |
| 0.14484300 |             |             |   |
| C          | -2.82758000 | -3.45093100 | - |
| 0.27463500 |             |             |   |
| C          | -3.13480900 | -1.20840600 | - |
| 0.26192900 |             |             |   |
| C          | -1.56883400 | -2.75538500 | - |
| 0.47371300 |             |             |   |
| H          | -2.94884000 | -4.52364500 | - |
| 0.23231500 |             |             |   |
| H          | -4.84753300 | -2.65008600 |   |
| 0.02674300 |             |             |   |
| N          | 1.13097500  | 1.56452300  | - |
| 0.68863200 |             |             |   |
| N          | -1.79004900 | -1.40219800 | - |
| 0.44289700 |             |             |   |
| N          | 1.12986800  | -1.35453400 | - |
| 0.75725100 |             |             |   |
| C          | -0.33966900 | 3.54482500  | - |
| 0.42981300 |             |             |   |
| C          | 3.12599000  | 0.11639000  | - |
| 0.90587300 |             |             |   |
| C          | 3.14336800  | -2.41018500 | - |
| 1.09739700 |             |             |   |
| C          | -3.82641700 | 2.57471900  | - |
| 0.28372700 |             |             |   |
| C          | 3.16057300  | 2.64774700  | - |
| 0.71209500 |             |             |   |
| C          | 2.18581900  | -3.37891600 | - |
| 1.02640000 |             |             |   |
| C          | -2.87172700 | 3.54726200  | - |
| 0.34882800 |             |             |   |
| C          | 2.19649800  | 3.60104700  | - |
| 0.56936600 |             |             |   |

|            |             |             |   |
|------------|-------------|-------------|---|
| C          | 2.47891400  | -1.13823100 | - |
| 0.91511300 |             |             |   |
| C          | -3.14046300 | 1.30261000  | - |
| 0.24633500 |             |             |   |
| C          | 2.48533300  | 1.36797200  | - |
| 0.79743100 |             |             |   |
| C          | 0.92160800  | -2.71447000 | - |
| 0.79892500 |             |             |   |
| C          | -1.58672800 | 2.88497900  | - |
| 0.35554600 |             |             |   |
| C          | 0.91703400  | 2.91708400  | - |
| 0.56857000 |             |             |   |
| H          | 2.31905600  | -4.44587100 | - |
| 1.13114100 |             |             |   |
| H          | -3.02463600 | 4.61485300  | - |
| 0.41127200 |             |             |   |
| H          | 2.33573100  | 4.66771400  | - |
| 0.46878700 |             |             |   |
| H          | 4.20100600  | -2.54224900 | - |
| 1.27417600 |             |             |   |
| H          | -4.89867800 | 2.70609200  | - |
| 0.28158700 |             |             |   |
| H          | 4.23035100  | 2.79478900  | - |
| 0.74878300 |             |             |   |
| N          | 0.07552400  | -0.36600000 |   |
| 1.92131400 |             |             |   |
| N          | -0.19982500 | -1.60786000 |   |
| 2.22440900 |             |             |   |
| N          | 0.36817400  | -2.46269600 |   |
| 2.78253600 |             |             |   |
| C          | 1.36497700  | -0.12950700 |   |
| 2.45174100 |             |             |   |
| C          | 1.98527900  | 1.12772600  |   |
| 2.33501700 |             |             |   |
| C          | 3.20057700  | -1.03944300 |   |
| 3.55389800 |             |             |   |
| C          | 3.26923700  | 1.25180000  |   |
| 2.83683600 |             |             |   |
| H          | 1.46954900  | 1.94004500  |   |
| 1.84046300 |             |             |   |
| C          | 3.89860700  | 0.15508400  |   |
| 3.45505000 |             |             |   |
| H          | 3.61448600  | -1.92391900 |   |
| 4.02865800 |             |             |   |

|            |             |             |   |
|------------|-------------|-------------|---|
| H          | 3.79123100  | 2.19841100  |   |
| 2.73892900 |             |             |   |
| H          | 4.90537800  | 0.23279300  |   |
| 3.85099700 |             |             |   |
| N          | 1.95983200  | -1.14863900 |   |
| 3.05655100 |             |             |   |
| C          | -0.35532700 | 5.03837900  | - |
| 0.36923500 |             |             |   |
| C          | -0.81605500 | 5.70354900  |   |
| 0.77837400 |             |             |   |
| C          | 0.08899600  | 5.80785700  | - |
| 1.45650300 |             |             |   |
| C          | -0.83052800 | 7.09754400  |   |
| 0.83864000 |             |             |   |
| H          | -1.16265000 | 5.11555100  |   |
| 1.62363500 |             |             |   |
| C          | 0.07527800  | 7.20191500  | - |
| 1.39742700 |             |             |   |
| H          | 0.44133300  | 5.30114200  | - |
| 2.35042500 |             |             |   |
| C          | -0.38416800 | 7.85151300  | - |
| 0.24926200 |             |             |   |
| H          | -1.18723600 | 7.59446700  |   |
| 1.73708100 |             |             |   |
| H          | 0.41804500  | 7.78060400  | - |
| 2.25120200 |             |             |   |
| H          | -0.39564300 | 8.93720800  | - |
| 0.20325400 |             |             |   |
| C          | -5.26721500 | 0.04151100  | - |
| 0.03798300 |             |             |   |
| C          | -5.87397600 | 0.57050300  |   |
| 1.11241000 |             |             |   |
| C          | -6.08851700 | -0.48788500 | - |
| 1.04618100 |             |             |   |
| C          | -7.26234200 | 0.56916900  |   |
| 1.25182600 |             |             |   |
| H          | -5.24505400 | 0.97995100  |   |
| 1.89785400 |             |             |   |
| C          | -7.47703600 | -0.48979000 | - |
| 0.90779100 |             |             |   |
| H          | -5.62691200 | -0.89479700 | - |
| 1.94138500 |             |             |   |
| C          | -8.06857800 | 0.03867000  |   |
| 0.24199100 |             |             |   |

|            |             |             |   |
|------------|-------------|-------------|---|
| H          | -7.71387000 | 0.97847800  |   |
| 2.15179500 |             |             |   |
| H          | -8.09685600 | -0.89959900 | - |
| 1.70100500 |             |             |   |
| H          | -9.14993300 | 0.03741200  |   |
| 0.35007800 |             |             |   |
| C          | -0.28602100 | -4.87228300 | - |
| 0.62079400 |             |             |   |
| C          | 0.32013300  | -5.55057000 |   |
| 0.44831300 |             |             |   |
| C          | -0.86445600 | -5.62264700 | - |
| 1.65531700 |             |             |   |
| C          | 0.34826100  | -6.94539000 |   |
| 0.48030800 |             |             |   |
| H          | 0.76018800  | -4.97212500 |   |
| 1.25593400 |             |             |   |
| C          | -0.83635800 | -7.01783600 | - |
| 1.62368400 |             |             |   |
| H          | -1.33395600 | -5.10212200 | - |
| 2.48536700 |             |             |   |
| C          | -0.22926800 | -7.68314400 | - |
| 0.55598500 |             |             |   |
| H          | 0.81702400  | -7.45595700 |   |
| 1.31759000 |             |             |   |
| H          | -1.28512900 | -7.58465200 | - |
| 2.43526900 |             |             |   |
| H          | -0.20724000 | -8.76943100 | - |
| 0.53126800 |             |             |   |
| C          | 4.61845600  | 0.11701100  | - |
| 0.98454600 |             |             |   |
| C          | 5.38363400  | -0.44450500 |   |
| 0.05059000 |             |             |   |
| C          | 5.28673700  | 0.68479100  | - |
| 2.08041500 |             |             |   |
| C          | 6.77765900  | -0.43777900 | - |
| 0.00821400 |             |             |   |
| H          | 4.87265100  | -0.88053200 |   |
| 0.90376500 |             |             |   |
| C          | 6.68115900  | 0.69305400  | - |
| 2.13956800 |             |             |   |
| H          | 4.70166700  | 1.11727200  | - |
| 2.88708200 |             |             |   |
| C          | 7.43143600  | 0.13191900  | - |
| 1.10347100 |             |             |   |

|                |             |             |   |
|----------------|-------------|-------------|---|
| H              | 7.35385700  | -0.87480600 |   |
| 0.80351800     |             |             |   |
| H              | 7.18129400  | 1.13293600  | - |
| 2.99843000     |             |             |   |
| H              | 8.51716200  | 0.13733000  | - |
| 1.15009700     |             |             |   |
| <b>CSSINT6</b> |             |             |   |
| Fe             | -0.20464400 | 0.11867100  | - |
| 0.42921100     |             |             |   |
| N              | 1.70586000  | -0.40415500 | - |
| 0.75747600     |             |             |   |
| C              | -3.21705400 | -1.54299500 | - |
| 0.70194900     |             |             |   |
| C              | 1.46939600  | -2.84980600 | - |
| 0.51974800     |             |             |   |
| C              | -0.69111100 | -4.10133600 | - |
| 0.78412600     |             |             |   |
| C              | -1.99369200 | -3.73427500 | - |
| 0.91819400     |             |             |   |
| C              | 0.07376000  | -2.88584000 | - |
| 0.62924000     |             |             |   |
| C              | -2.03893600 | -2.29460500 | - |
| 0.79333300     |             |             |   |
| H              | -2.85186000 | -4.37132400 | - |
| 1.07370400     |             |             |   |
| H              | -0.27059100 | -5.09609000 | - |
| 0.81719700     |             |             |   |
| N              | 0.33658700  | 2.04750900  | - |
| 0.44685100     |             |             |   |
| N              | -0.76160600 | -1.79184400 | - |
| 0.66256400     |             |             |   |
| N              | -2.13502100 | 0.65819800  | - |
| 0.35380500     |             |             |   |
| C              | 2.74498900  | 1.83045100  | - |
| 0.97365200     |             |             |   |
| C              | -1.85660800 | 3.07685100  |   |
| 0.06974200     |             |             |   |
| C              | -4.05519300 | 1.85181500  |   |
| 0.14447500     |             |             |   |
| C              | 3.66601000  | -1.63387500 | - |
| 0.68044600     |             |             |   |
| C              | 0.25245500  | 4.36019200  | - |
| 0.38514200     |             |             |   |

|            |             |             |   |
|------------|-------------|-------------|---|
| C          | -4.43809800 | 0.57762400  | - |
| 0.13515500 |             |             |   |
| C          | 4.01533500  | -0.33591000 | - |
| 0.88761900 |             |             |   |
| C          | 1.51993700  | 4.01767600  | - |
| 0.73769500 |             |             |   |
| C          | -2.62084200 | 1.90732600  | - |
| 0.02452300 |             |             |   |
| C          | 2.22337100  | -1.67696100 | - |
| 0.63287500 |             |             |   |
| C          | -0.48403500 | 3.12905900  | - |
| 0.21133700 |             |             |   |
| C          | -3.23757000 | -0.16557200 | - |
| 0.44118300 |             |             |   |
| C          | 2.79029200  | 0.43023300  | - |
| 0.91856700 |             |             |   |
| C          | 1.57869000  | 2.57349400  | - |
| 0.74752600 |             |             |   |
| H          | -5.43516600 | 0.16270000  | - |
| 0.11451900 |             |             |   |
| H          | 5.00873200  | 0.07758700  | - |
| 0.98233300 |             |             |   |
| H          | 2.34253700  | 4.67471300  | - |
| 0.97897700 |             |             |   |
| H          | -4.68055500 | 2.68379800  |   |
| 0.43264800 |             |             |   |
| H          | 4.31712300  | -2.48991100 | - |
| 0.58129900 |             |             |   |
| H          | -0.16536400 | 5.35143200  | - |
| 0.28633000 |             |             |   |
| C          | 2.17804100  | -4.14228400 | - |
| 0.27908000 |             |             |   |
| C          | 2.02647100  | -4.78459600 |   |
| 0.95998200 |             |             |   |
| C          | 2.98801800  | -4.73771500 | - |
| 1.25667700 |             |             |   |
| C          | 2.67562000  | -5.99288200 |   |
| 1.21621900 |             |             |   |
| H          | 1.40127900  | -4.31899500 |   |
| 1.71703800 |             |             |   |
| C          | 3.63688200  | -5.94696400 | - |
| 1.00018700 |             |             |   |
| H          | 3.10102800  | -4.24767800 | - |
| 2.21971900 |             |             |   |

|            |             |             |   |
|------------|-------------|-------------|---|
| C          | 3.48288600  | -6.57722900 |   |
| 0.23688400 |             |             |   |
| H          | 2.55189100  | -6.47790200 |   |
| 2.18113500 |             |             |   |
| H          | 4.25793000  | -6.39929900 | - |
| 1.76896600 |             |             |   |
| H          | 3.98735800  | -7.51912000 |   |
| 0.43558200 |             |             |   |
| C          | -2.54263500 | 4.35897700  |   |
| 0.41320800 |             |             |   |
| C          | -3.50367600 | 4.92134500  | - |
| 0.44155600 |             |             |   |
| C          | -2.21856400 | 5.03774100  |   |
| 1.59825800 |             |             |   |
| C          | -4.12941500 | 6.12546300  | - |
| 0.11629000 |             |             |   |
| H          | -3.75166100 | 4.40762400  | - |
| 1.36596700 |             |             |   |
| C          | -2.84393400 | 6.24171200  |   |
| 1.92486100 |             |             |   |
| H          | -1.47169100 | 4.61081600  |   |
| 2.26184100 |             |             |   |
| C          | -3.80236200 | 6.78889100  |   |
| 1.06871600 |             |             |   |
| H          | -4.86813600 | 6.54836600  | - |
| 0.79208800 |             |             |   |
| H          | -2.58422900 | 6.75078100  |   |
| 2.84936800 |             |             |   |
| H          | -4.28950200 | 7.72670900  |   |
| 1.32201800 |             |             |   |
| C          | 4.02786300  | 2.55933600  | - |
| 1.20439200 |             |             |   |
| C          | 4.58171500  | 3.37885400  | - |
| 0.20778700 |             |             |   |
| C          | 4.71978900  | 2.41849800  | - |
| 2.41739900 |             |             |   |
| C          | 5.79052800  | 4.04299100  | - |
| 0.41893800 |             |             |   |
| H          | 4.05380000  | 3.49156800  |   |
| 0.73537400 |             |             |   |
| C          | 5.92899200  | 3.08186300  | - |
| 2.63005000 |             |             |   |
| H          | 4.29900300  | 1.78392800  | - |
| 3.19219900 |             |             |   |



|            |             |             |   |
|------------|-------------|-------------|---|
| C          | 6.46820600  | 3.89648800  | - |
| 1.63163900 |             |             |   |
| H          | 6.20507100  | 4.67117400  |   |
| 0.36524600 |             |             |   |
| H          | 6.44817600  | 2.96481500  | - |
| 3.57763600 |             |             |   |
| H          | 7.40972100  | 4.41322700  | - |
| 1.79719000 |             |             |   |
| C          | -4.52816100 | -2.25195700 | - |
| 0.80828300 |             |             |   |
| C          | -5.38672500 | -2.00021300 | - |
| 1.88900800 |             |             |   |
| C          | -4.93309400 | -3.16631400 |   |
| 0.17646800 |             |             |   |
| C          | -6.61695900 | -2.65196400 | - |
| 1.98735200 |             |             |   |
| H          | -5.08003800 | -1.28983600 | - |
| 2.65171300 |             |             |   |
| C          | -6.16313600 | -3.81803100 |   |
| 0.07883900 |             |             |   |
| H          | -4.27625300 | -3.35568700 |   |
| 1.02064600 |             |             |   |
| C          | -7.00824200 | -3.56352800 | - |
| 1.00401700 |             |             |   |
| H          | -7.26823900 | -2.44933200 | - |
| 2.83353900 |             |             |   |
| H          | -6.46363400 | -4.52033400 |   |
| 0.85199100 |             |             |   |
| H          | -7.96628700 | -4.07088700 | - |
| 1.08000200 |             |             |   |
| C          | 2.15674900  | 0.49008500  |   |
| 2.18348900 |             |             |   |
| C          | 1.13142500  | -0.44988000 |   |
| 2.30334700 |             |             |   |
| C          | 2.38009200  | -1.84122800 |   |
| 3.60216300 |             |             |   |
| C          | 3.48849400  | -1.00066400 |   |
| 3.52111300 |             |             |   |
| C          | 3.36690100  | 0.18956200  |   |
| 2.79690000 |             |             |   |
| H          | 1.99870700  | 1.39092900  |   |
| 1.60610900 |             |             |   |
| H          | 2.42558500  | -2.77224500 |   |
| 4.16255800 |             |             |   |

|            |             |             |
|------------|-------------|-------------|
| H          | 4.41883200  | -1.27194100 |
| 4.00923200 |             |             |
| H          | 4.20437800  | 0.87499700  |
| 2.70615000 |             |             |
| N          | -0.08815200 | -0.18620200 |
| 1.59735800 |             |             |
| N          | 1.21153200  | -1.58154100 |
| 2.99745500 |             |             |
| N          | -2.04245500 | -1.32657800 |
| 2.35613300 |             |             |
| N          | -1.08451400 | -0.82388000 |
| 2.03228400 |             |             |

**oss-INT6**

|            |             |             |   |
|------------|-------------|-------------|---|
| Fe         | -0.24541700 | 0.14585900  | - |
| 0.48676600 |             |             |   |
| N          | 1.70988100  | -0.21261300 | - |
| 0.78211900 |             |             |   |
| C          | -3.10478300 | -1.78145200 | - |
| 0.68253200 |             |             |   |
| C          | 1.68367600  | -2.67617100 | - |
| 0.58071600 |             |             |   |
| C          | -0.36543800 | -4.10572200 | - |
| 0.81488300 |             |             |   |
| C          | -1.69800500 | -3.85379400 | - |
| 0.92198600 |             |             |   |
| C          | 0.29375900  | -2.83031600 | - |
| 0.66338800 |             |             |   |
| C          | -1.86663200 | -2.42622700 | - |
| 0.78699600 |             |             |   |
| H          | -2.49979200 | -4.56310100 | - |
| 1.06433000 |             |             |   |
| H          | 0.13874100  | -5.06011900 | - |
| 0.86120700 |             |             |   |
| N          | 0.13471400  | 2.11196900  | - |
| 0.43940300 |             |             |   |
| N          | -0.63522100 | -1.81437800 | - |
| 0.66999700 |             |             |   |
| N          | -2.21325500 | 0.50765800  | - |
| 0.35289700 |             |             |   |
| C          | 2.56087300  | 2.10715800  | - |
| 0.93257600 |             |             |   |
| C          | -2.14479200 | 2.94482800  | - |
| 0.06325600 |             |             |   |

|            |             |             |   |
|------------|-------------|-------------|---|
| C          | -4.22308000 | 1.53031100  |   |
| 0.16072700 |             |             |   |
| C          | 3.76453900  | -1.27305900 | - |
| 0.72739000 |             |             |   |
| C          | -0.14331800 | 4.40546600  | - |
| 0.33693400 |             |             |   |
| C          | -4.49619100 | 0.22441000  | - |
| 0.10314900 |             |             |   |
| C          | 4.00436500  | 0.05475700  | - |
| 0.90125600 |             |             |   |
| C          | 1.15690600  | 4.17644900  | - |
| 0.66439400 |             |             |   |
| C          | -2.80211300 | 1.71090700  | - |
| 0.02621900 |             |             |   |
| C          | 2.33201000  | -1.44017900 | - |
| 0.68281500 |             |             |   |
| C          | -0.77893300 | 3.11611700  | - |
| 0.20136000 |             |             |   |
| C          | -3.24038200 | -0.41198800 | - |
| 0.42043800 |             |             |   |
| C          | 2.72124600  | 0.71513500  | - |
| 0.91628800 |             |             |   |
| C          | 1.33474100  | 2.74457500  | - |
| 0.70413900 |             |             |   |
| H          | -5.45199900 | -0.27701500 | - |
| 0.06358500 |             |             |   |
| H          | 4.95978900  | 0.55266400  | - |
| 0.97735000 |             |             |   |
| H          | 1.92811800  | 4.90420700  | - |
| 0.86957900 |             |             |   |
| H          | -4.91486600 | 2.30602900  |   |
| 0.45407600 |             |             |   |
| H          | 4.48589200  | -2.07176800 | - |
| 0.63842900 |             |             |   |
| H          | -0.64252700 | 5.35688500  | - |
| 0.22568800 |             |             |   |
| C          | 2.50419400  | -3.90562000 | - |
| 0.36862100 |             |             |   |
| C          | 2.40662900  | -4.59062300 |   |
| 0.85342200 |             |             |   |
| C          | 3.36806300  | -4.40073500 | - |
| 1.35616600 |             |             |   |
| C          | 3.16212900  | -5.74107700 |   |
| 1.08277400 |             |             |   |

|            |             |             |   |
|------------|-------------|-------------|---|
| H          | 1.74067600  | -4.20142000 |   |
| 1.61833600 |             |             |   |
| C          | 4.12341300  | -5.55204500 | - |
| 1.12597900 |             |             |   |
| H          | 3.43872600  | -3.87926500 | - |
| 2.30666100 |             |             |   |
| C          | 4.02316300  | -6.22458400 |   |
| 0.09422900 |             |             |   |
| H          | 3.07909400  | -6.25969200 |   |
| 2.03450000 |             |             |   |
| H          | 4.78520900  | -5.92683700 | - |
| 1.90242300 |             |             |   |
| H          | 4.61054400  | -7.12144500 |   |
| 0.27242300 |             |             |   |
| C          | -2.94493900 | 4.16044000  |   |
| 0.40162100 |             |             |   |
| C          | -3.94496300 | 4.63446400  | - |
| 0.46192300 |             |             |   |
| C          | -2.69624000 | 4.86261100  |   |
| 1.59131400 |             |             |   |
| C          | -4.68067700 | 5.77613100  | - |
| 0.14160700 |             |             |   |
| H          | -4.13674800 | 4.10158200  | - |
| 1.38889600 |             |             |   |
| C          | -3.43148700 | 6.00428900  |   |
| 1.91270300 |             |             |   |
| H          | -1.92174600 | 4.50268300  |   |
| 2.26284400 |             |             |   |
| C          | -4.42675400 | 6.46418000  |   |
| 1.04727400 |             |             |   |
| H          | -5.44834900 | 6.13133500  | - |
| 0.82405600 |             |             |   |
| H          | -3.22883800 | 6.53245300  |   |
| 2.84073300 |             |             |   |
| H          | -4.99951500 | 7.35337100  |   |
| 1.29672900 |             |             |   |
| C          | 3.78204200  | 2.94654700  | - |
| 1.11983900 |             |             |   |
| C          | 4.25889200  | 3.76355800  | - |
| 0.08224800 |             |             |   |
| C          | 4.49254700  | 2.91499600  | - |
| 2.32963300 |             |             |   |
| C          | 5.41196500  | 4.53119900  | - |
| 0.25028300 |             |             |   |

|            |             |             |   |
|------------|-------------|-------------|---|
| H          | 3.71517400  | 3.79194600  |   |
| 0.85825700 |             |             |   |
| C          | 5.64614500  | 3.68192800  | - |
| 2.49901500 |             |             |   |
| H          | 4.13082400  | 2.28342700  | - |
| 3.13609500 |             |             |   |
| C          | 6.10942900  | 4.49252000  | - |
| 1.46001800 |             |             |   |
| H          | 5.76775900  | 5.15583300  |   |
| 0.56493500 |             |             |   |
| H          | 6.18110300  | 3.64867200  | - |
| 3.44445700 |             |             |   |
| H          | 7.00761100  | 5.08976800  | - |
| 1.59196600 |             |             |   |
| C          | -4.34912300 | -2.60468500 | - |
| 0.76234000 |             |             |   |
| C          | -5.24645900 | -2.43863600 | - |
| 1.82786800 |             |             |   |
| C          | -4.65167700 | -3.54352600 |   |
| 0.23627600 |             |             |   |
| C          | -6.41530900 | -3.19818100 | - |
| 1.89822700 |             |             |   |
| H          | -5.01865300 | -1.70995700 | - |
| 2.60092000 |             |             |   |
| C          | -5.82045800 | -4.30268000 |   |
| 0.16630900 |             |             |   |
| H          | -3.96489900 | -3.66563400 |   |
| 1.06897600 |             |             |   |
| C          | -6.70498700 | -4.13303500 | - |
| 0.90165900 |             |             |   |
| H          | -7.09788500 | -3.06125500 | - |
| 2.73284300 |             |             |   |
| H          | -6.04280800 | -5.02266500 |   |
| 0.94954100 |             |             |   |
| H          | -7.61521000 | -4.72430400 | - |
| 0.95587200 |             |             |   |
| C          | 2.16087000  | 0.53820100  |   |
| 2.22111000 |             |             |   |
| C          | 1.25240000  | -0.51280500 |   |
| 2.38775800 |             |             |   |
| C          | 2.81852900  | -1.87913100 |   |
| 3.32136900 |             |             |   |
| C          | 3.81567100  | -0.91606400 |   |
| 3.18403100 |             |             |   |

|            |             |             |
|------------|-------------|-------------|
| C          | 3.47248900  | 0.31725200  |
| 2.61969900 |             |             |
| H          | 1.83703300  | 1.46092100  |
| 1.75579800 |             |             |
| H          | 3.04153100  | -2.85304300 |
| 3.75140100 |             |             |
| H          | 4.83120500  | -1.12922100 |
| 3.50114800 |             |             |
| H          | 4.21934600  | 1.09306800  |
| 2.47896600 |             |             |
| N          | -0.06540000 | -0.29624200 |
| 1.89594500 |             |             |
| N          | 1.54984000  | -1.69387700 |
| 2.92800900 |             |             |
| N          | -1.77502500 | -1.86627800 |
| 2.40900500 |             |             |
| N          | -0.91087300 | -1.16295500 |
| 2.20941000 |             |             |

**<sup>3</sup>INT6**

|            |             |             |   |
|------------|-------------|-------------|---|
| Fe         | -0.27160100 | 0.16073200  | - |
| 0.52536800 |             |             |   |
| N          | -2.24753700 | 0.44524700  | - |
| 0.36276500 |             |             |   |
| C          | 1.76861700  | -2.59151300 | - |
| 0.61835800 |             |             |   |
| C          | -3.05170500 | -1.88099300 | - |
| 0.65854900 |             |             |   |
| C          | -1.56950300 | -3.89385400 | - |
| 0.91167400 |             |             |   |
| C          | -0.22712200 | -4.09417200 | - |
| 0.82524500 |             |             |   |
| C          | -1.79065900 | -2.47467800 | - |
| 0.77478600 |             |             |   |
| C          | 0.38511500  | -2.79534800 | - |
| 0.68223600 |             |             |   |
| H          | 0.31262600  | -5.02840600 | - |
| 0.87831800 |             |             |   |
| H          | -2.34596300 | -4.63320300 | - |
| 1.03993900 |             |             |   |
| N          | 0.03570100  | 2.13574800  | - |
| 0.43669400 |             |             |   |
| N          | -0.58174500 | -1.81438100 | - |
| 0.67471500 |             |             |   |

|            |             |             |   |
|------------|-------------|-------------|---|
| N          | 1.69733500  | -0.12509600 | - |
| 0.78999400 |             |             |   |
| C          | -2.27729500 | 2.88594900  |   |
| 0.04335500 |             |             |   |
| C          | 2.46688700  | 2.22604800  | - |
| 0.89912000 |             |             |   |
| C          | 3.98083600  | 0.22931000  | - |
| 0.90707300 |             |             |   |
| C          | -4.51490500 | 0.07139200  | - |
| 0.08625000 |             |             |   |
| C          | 0.98881600  | 4.23731100  | - |
| 0.62359400 |             |             |   |
| C          | 3.79023800  | -1.10920800 | - |
| 0.75842900 |             |             |   |
| C          | -4.29297700 | 1.39037100  |   |
| 0.15902300 |             |             |   |
| C          | -0.32473000 | 4.41723900  | - |
| 0.31952200 |             |             |   |
| C          | 2.67552400  | 0.84176700  | - |
| 0.90699700 |             |             |   |
| C          | -3.23792400 | -0.51647800 | - |
| 0.40831200 |             |             |   |
| C          | 1.21708400  | 2.81431900  | - |
| 0.67564700 |             |             |   |
| C          | 2.36609600  | -1.33039600 | - |
| 0.71142700 |             |             |   |
| C          | -2.88283600 | 1.62636100  | - |
| 0.04116800 |             |             |   |
| C          | -0.91679400 | 3.10633500  | - |
| 0.20557300 |             |             |   |
| H          | 4.54025800  | -1.88233000 | - |
| 0.68284300 |             |             |   |
| H          | -5.01240000 | 2.14100000  |   |
| 0.45106100 |             |             |   |
| H          | -0.85903000 | 5.34926600  | - |
| 0.20773500 |             |             |   |
| H          | 4.91690800  | 0.76383700  | - |
| 0.97282200 |             |             |   |
| H          | -5.44857900 | -0.46861900 | - |
| 0.03109900 |             |             |   |
| H          | 1.73849000  | 4.99313200  | - |
| 0.80560100 |             |             |   |
| N          | -0.04837000 | -0.44501300 |   |
| 2.08504100 |             |             |   |

|            |             |             |   |
|------------|-------------|-------------|---|
| N          | -0.76341200 | -1.44301500 |   |
| 2.29879300 |             |             |   |
| N          | -1.52908200 | -2.26942100 |   |
| 2.42611300 |             |             |   |
| C          | 1.31979200  | -0.56597500 |   |
| 2.43630000 |             |             |   |
| C          | 2.11054600  | 0.57629000  |   |
| 2.25705600 |             |             |   |
| C          | 3.08740800  | -1.81907700 |   |
| 3.14660600 |             |             |   |
| C          | 3.46563800  | 0.46738500  |   |
| 2.53736200 |             |             |   |
| H          | 1.66466200  | 1.48285300  |   |
| 1.86546300 |             |             |   |
| C          | 3.97190700  | -0.75380700 |   |
| 2.99622800 |             |             |   |
| H          | 3.43980700  | -2.79039700 |   |
| 3.48666400 |             |             |   |
| H          | 4.12165800  | 1.31876200  |   |
| 2.38091200 |             |             |   |
| H          | 5.02644700  | -0.88067700 |   |
| 3.21792200 |             |             |   |
| N          | 1.77712300  | -1.74039300 |   |
| 2.87211500 |             |             |   |
| C          | -3.12811100 | 4.06969800  |   |
| 0.37038900 |             |             |   |
| C          | -2.92116500 | 4.78405500  |   |
| 1.56080600 |             |             |   |
| C          | -4.13795900 | 4.49942200  | - |
| 0.50475600 |             |             |   |
| C          | -3.70591900 | 5.89549400  |   |
| 1.87086400 |             |             |   |
| H          | -2.14037000 | 4.45733800  |   |
| 2.24190900 |             |             |   |
| C          | -4.92312300 | 5.61084600  | - |
| 0.19567300 |             |             |   |
| H          | -4.29855600 | 3.95601500  | - |
| 1.43157200 |             |             |   |
| C          | -4.70987300 | 6.31197900  |   |
| 0.99354800 |             |             |   |
| H          | -3.53519800 | 6.43369400  |   |
| 2.79952700 |             |             |   |
| H          | -5.69780700 | 5.93218600  | - |
| 0.88690500 |             |             |   |



|            |             |             |   |
|------------|-------------|-------------|---|
| H          | -5.32117800 | 7.17757400  |   |
| 1.23432400 |             |             |   |
| C          | 3.65915200  | 3.11266900  | - |
| 1.05362900 |             |             |   |
| C          | 4.37729500  | 3.14486000  | - |
| 2.25860000 |             |             |   |
| C          | 4.09976700  | 3.91217200  |   |
| 0.01313400 |             |             |   |
| C          | 5.50448400  | 3.95655800  | - |
| 2.39456400 |             |             |   |
| H          | 4.04309200  | 2.52738300  | - |
| 3.08755200 |             |             |   |
| C          | 5.22648000  | 4.72431300  | - |
| 0.12146900 |             |             |   |
| H          | 3.54826100  | 3.89200400  |   |
| 0.94936400 |             |             |   |
| C          | 5.93257700  | 4.74861300  | - |
| 1.32657400 |             |             |   |
| H          | 6.04632500  | 3.97255400  | - |
| 3.33651400 |             |             |   |
| H          | 5.55480500  | 5.33464900  |   |
| 0.71577500 |             |             |   |
| H          | 6.81023700  | 5.38050700  | - |
| 1.43259900 |             |             |   |
| C          | 2.63864400  | -3.79082800 | - |
| 0.43245000 |             |             |   |
| C          | 3.50949200  | -4.23607800 | - |
| 1.43749600 |             |             |   |
| C          | 2.58254000  | -4.49753700 |   |
| 0.77997700 |             |             |   |
| C          | 4.31277800  | -5.35962400 | - |
| 1.23402700 |             |             |   |
| H          | 3.54803300  | -3.69795300 | - |
| 2.38055300 |             |             |   |
| C          | 3.38606300  | -5.62029700 |   |
| 0.98216500 |             |             |   |
| H          | 1.91292300  | -4.14556700 |   |
| 1.55938800 |             |             |   |
| C          | 4.25389100  | -6.05400400 | - |
| 0.02341800 |             |             |   |
| H          | 4.97957600  | -5.69579200 | - |
| 2.02375200 |             |             |   |
| H          | 3.33493900  | -6.15611600 |   |
| 1.92657000 |             |             |   |

|                         |             |             |   |
|-------------------------|-------------|-------------|---|
| H                       | 4.87862200  | -6.92923500 |   |
| 0.13411400              |             |             |   |
| C                       | -4.26172300 | -2.75603800 | - |
| 0.71114300              |             |             |   |
| C                       | -5.18026700 | -2.64162700 | - |
| 1.76517200              |             |             |   |
| C                       | -4.50884700 | -3.69389400 |   |
| 0.30359600              |             |             |   |
| C                       | -6.31673100 | -3.45077900 | - |
| 1.80846300              |             |             |   |
| H                       | -4.99471600 | -1.91417900 | - |
| 2.55060500              |             |             |   |
| C                       | -5.64543300 | -4.50233000 |   |
| 0.26050100              |             |             |   |
| H                       | -3.80463800 | -3.77645700 |   |
| 1.12662700              |             |             |   |
| C                       | -6.55185900 | -4.38387800 | - |
| 0.79600600              |             |             |   |
| H                       | -7.01654400 | -3.35383000 | - |
| 2.63434900              |             |             |   |
| H                       | -5.82552200 | -5.22110500 |   |
| 1.05559500              |             |             |   |
| H                       | -7.43687300 | -5.01371400 | - |
| 0.82918900              |             |             |   |
| <b><sup>5</sup>INT6</b> |             |             |   |
| Fe                      | -0.28731700 | 0.13056400  | - |
| 0.40281500              |             |             |   |
| N                       | -0.17063100 | 2.20726800  | - |
| 0.37673600              |             |             |   |
| C                       | -2.88252100 | -2.17686600 | - |
| 0.51990500              |             |             |   |
| C                       | -2.57676700 | 2.70818400  | - |
| 0.06391500              |             |             |   |
| C                       | -4.45571900 | 1.01773900  |   |
| 0.13180800              |             |             |   |
| C                       | -4.54141100 | -0.33609800 | - |
| 0.01447900              |             |             |   |
| C                       | -3.07734300 | 1.38735700  | - |
| 0.09631500              |             |             |   |
| C                       | -3.21558800 | -0.81844500 | - |
| 0.32507000              |             |             |   |
| H                       | -5.41987700 | -0.95496200 |   |
| 0.09575600              |             |             |   |

|            |             |             |   |
|------------|-------------|-------------|---|
| H          | -5.25247100 | 1.70216200  |   |
| 0.38399000 |             |             |   |
| N          | 1.73339600  | 0.03007500  | - |
| 0.83770600 |             |             |   |
| N          | -2.34444800 | 0.25096400  | - |
| 0.35358500 |             |             |   |
| N          | -0.42846700 | -1.93721300 | - |
| 0.66882400 |             |             |   |
| C          | 2.26082500  | 2.45985700  | - |
| 0.78555300 |             |             |   |
| C          | 1.98889400  | -2.44165400 | - |
| 0.77162100 |             |             |   |
| C          | 0.12501200  | -4.15967900 | - |
| 0.88918100 |             |             |   |
| C          | -0.74787800 | 4.43552800  | - |
| 0.39444900 |             |             |   |
| C          | 3.88823200  | -0.77224000 | - |
| 0.83109300 |             |             |   |
| C          | -1.23438900 | -4.08435200 | - |
| 0.86166500 |             |             |   |
| C          | 0.59547400  | 4.36683800  | - |
| 0.60653600 |             |             |   |
| C          | 3.96268400  | 0.58941500  | - |
| 0.87236600 |             |             |   |
| C          | 0.62757500  | -2.80467200 | - |
| 0.76730600 |             |             |   |
| C          | -1.22821400 | 3.07478000  | - |
| 0.25071600 |             |             |   |
| C          | 2.48779300  | -1.12390100 | - |
| 0.82062400 |             |             |   |
| C          | -1.57893200 | -2.68430300 | - |
| 0.69339700 |             |             |   |
| C          | 0.95818100  | 2.96310800  | - |
| 0.59290400 |             |             |   |
| C          | 2.60841300  | 1.09284800  | - |
| 0.86315000 |             |             |   |
| H          | -1.94260200 | -4.89576200 | - |
| 0.94443100 |             |             |   |
| H          | 1.27770000  | 5.18563900  | - |
| 0.78382500 |             |             |   |
| H          | 4.85526200  | 1.19767200  | - |
| 0.87598400 |             |             |   |
| H          | 0.73781700  | -5.04247900 | - |
| 1.00281700 |             |             |   |

|            |             |             |   |
|------------|-------------|-------------|---|
| H          | -1.36600100 | 5.32114200  | - |
| 0.36566400 |             |             |   |
| H          | 4.70775400  | -1.47514000 | - |
| 0.79810200 |             |             |   |
| N          | 0.07705300  | -0.51075800 |   |
| 1.98387400 |             |             |   |
| N          | -0.53056100 | -1.56711500 |   |
| 2.26567200 |             |             |   |
| N          | -1.19550000 | -2.46286000 |   |
| 2.45698600 |             |             |   |
| C          | 1.44147100  | -0.46352900 |   |
| 2.39137200 |             |             |   |
| C          | 2.09258200  | 0.76676200  |   |
| 2.25506300 |             |             |   |
| C          | 3.31554300  | -1.51077300 |   |
| 3.15325100 |             |             |   |
| C          | 3.44241000  | 0.81328700  |   |
| 2.57969400 |             |             |   |
| H          | 1.55390400  | 1.62298800  |   |
| 1.86685200 |             |             |   |
| C          | 4.07293100  | -0.34647700 |   |
| 3.04195800 |             |             |   |
| H          | 3.76651900  | -2.43730500 |   |
| 3.50154400 |             |             |   |
| H          | 3.99676800  | 1.73914700  |   |
| 2.45672200 |             |             |   |
| H          | 5.12719100  | -0.35176100 |   |
| 3.29839200 |             |             |   |
| N          | 2.01588300  | -1.58217400 |   |
| 2.83152600 |             |             |   |
| C          | 3.37690300  | 3.45035000  | - |
| 0.85857000 |             |             |   |
| C          | 3.66365100  | 4.28253700  |   |
| 0.23623600 |             |             |   |
| C          | 4.17261400  | 3.56103400  | - |
| 2.00975900 |             |             |   |
| C          | 4.71605000  | 5.19723900  |   |
| 0.18322300 |             |             |   |
| H          | 3.05002600  | 4.20650500  |   |
| 1.12998000 |             |             |   |
| C          | 5.22524700  | 4.47549500  | - |
| 2.06437000 |             |             |   |
| H          | 3.95594000  | 2.92348200  | - |
| 2.86210500 |             |             |   |

|            |             |             |   |
|------------|-------------|-------------|---|
| C          | 5.50115300  | 5.29600000  | - |
| 0.96792500 |             |             |   |
| H          | 4.92441400  | 5.83019600  |   |
| 1.04188600 |             |             |   |
| H          | 5.82724500  | 4.55030000  | - |
| 2.96613200 |             |             |   |
| H          | 6.32091100  | 6.00802000  | - |
| 1.01082300 |             |             |   |
| C          | -3.55823000 | 3.81329900  |   |
| 0.15615100 |             |             |   |
| C          | -3.45770000 | 4.64233900  |   |
| 1.28498400 |             |             |   |
| C          | -4.59347200 | 4.05343900  | - |
| 0.76174400 |             |             |   |
| C          | -4.36765600 | 5.67956600  |   |
| 1.49249500 |             |             |   |
| H          | -2.66004600 | 4.46266600  |   |
| 2.00025700 |             |             |   |
| C          | -5.50385000 | 5.09044400  | - |
| 0.55533300 |             |             |   |
| H          | -4.67405200 | 3.42154100  | - |
| 1.64162000 |             |             |   |
| C          | -5.39425000 | 5.90674100  |   |
| 0.57294800 |             |             |   |
| H          | -4.27701900 | 6.30742300  |   |
| 2.37502800 |             |             |   |
| H          | -6.29545600 | 5.26426200  | - |
| 1.27947900 |             |             |   |
| H          | -6.10317800 | 6.71449300  |   |
| 0.73386600 |             |             |   |
| C          | -4.00409900 | -3.16520000 | - |
| 0.48826300 |             |             |   |
| C          | -4.09010100 | -4.11364700 |   |
| 0.54333900 |             |             |   |
| C          | -4.99389000 | -3.15934000 | - |
| 1.48313700 |             |             |   |
| C          | -5.13834300 | -5.03415900 |   |
| 0.57667100 |             |             |   |
| H          | -3.33045900 | -4.11720100 |   |
| 1.31976800 |             |             |   |
| C          | -6.04190900 | -4.08028000 | - |
| 1.45021900 |             |             |   |
| H          | -4.93220100 | -2.42762900 | - |
| 2.28384800 |             |             |   |

|                 |             |             |   |
|-----------------|-------------|-------------|---|
| C               | -6.11696300 | -5.02075600 | - |
| 0.42013500      |             |             |   |
| H               | -5.19291300 | -5.75889300 |   |
| 1.38480900      |             |             |   |
| H               | -6.79730900 | -4.06536400 | - |
| 2.23151400      |             |             |   |
| H               | -6.93302300 | -5.73797600 | - |
| 0.39407400      |             |             |   |
| C               | 2.98267300  | -3.55334500 | - |
| 0.66832000      |             |             |   |
| C               | 3.06822300  | -4.28925900 |   |
| 0.52468000      |             |             |   |
| C               | 3.83853800  | -3.88009500 | - |
| 1.72987200      |             |             |   |
| C               | 3.99141900  | -5.32790400 |   |
| 0.65103300      |             |             |   |
| H               | 2.41281500  | -4.02507500 |   |
| 1.35002500      |             |             |   |
| C               | 4.76141300  | -4.91999700 | - |
| 1.60287800      |             |             |   |
| H               | 3.77184600  | -3.31542200 | - |
| 2.65570200      |             |             |   |
| C               | 4.84018100  | -5.64638900 | - |
| 0.41231400      |             |             |   |
| H               | 4.04940600  | -5.88750300 |   |
| 1.58114900      |             |             |   |
| H               | 5.41498200  | -5.16574000 | - |
| 2.43581100      |             |             |   |
| H               | 5.55812400  | -6.45638700 | - |
| 0.31427200      |             |             |   |
| <b>CSS-INT7</b> |             |             |   |
| Fe              | -0.13139400 | 0.00038900  | - |
| 0.33636500      |             |             |   |
| N               | -1.66705500 | -1.28326600 | - |
| 0.47181100      |             |             |   |
| C               | 3.24032700  | -0.30379700 | - |
| 0.98406800      |             |             |   |
| C               | -0.42687400 | -3.40495600 | - |
| 0.17433400      |             |             |   |
| C               | 2.08066000  | -3.63646200 | - |
| 0.28120900      |             |             |   |
| C               | 3.09066100  | -2.78124900 | - |
| 0.59452700      |             |             |   |

|            |             |             |   |
|------------|-------------|-------------|---|
| C          | 0.85891200  | -2.86266800 | - |
| 0.29201400 |             |             |   |
| C          | 2.50065500  | -1.47073300 | - |
| 0.74782700 |             |             |   |
| H          | 4.14349000  | -3.00318100 | - |
| 0.69190300 |             |             |   |
| H          | 2.14665800  | -4.69574900 | - |
| 0.08080400 |             |             |   |
| N          | -1.41920400 | 1.53885600  | - |
| 0.47446600 |             |             |   |
| N          | 1.14207100  | -1.53566100 | - |
| 0.53623300 |             |             |   |
| N          | 1.38905500  | 1.28050900  | - |
| 0.56854000 |             |             |   |
| C          | -3.54738300 | 0.30074500  | - |
| 0.74245000 |             |             |   |
| C          | 0.17376400  | 3.40591900  | - |
| 0.20902600 |             |             |   |
| C          | 2.62769400  | 3.23066400  | - |
| 0.71719900 |             |             |   |
| C          | -2.90610600 | -3.23626700 | - |
| 0.54548400 |             |             |   |
| C          | -2.33518300 | 3.64178800  | - |
| 0.16414600 |             |             |   |
| C          | 3.46541600  | 2.20243100  | - |
| 1.01535100 |             |             |   |
| C          | -3.76714700 | -2.21004000 | - |
| 0.77906500 |             |             |   |
| C          | -3.36779000 | 2.78518400  | - |
| 0.38792400 |             |             |   |
| C          | 1.32991300  | 2.65036000  | - |
| 0.45107100 |             |             |   |
| C          | -1.59677700 | -2.65371100 | - |
| 0.35846300 |             |             |   |
| C          | -1.11841700 | 2.86715500  | - |
| 0.25583000 |             |             |   |
| C          | 2.69871300  | 0.98326400  | - |
| 0.88528700 |             |             |   |
| C          | -2.99828100 | -0.98869000 | - |
| 0.69357600 |             |             |   |
| C          | -2.79246400 | 1.47264000  | - |
| 0.57574400 |             |             |   |
| H          | 4.50607200  | 2.25492300  | - |
| 1.29994100 |             |             |   |

|            |             |             |   |
|------------|-------------|-------------|---|
| H          | -4.82432700 | -2.26622400 | - |
| 0.99297500 |             |             |   |
| H          | -4.42466900 | 3.00831400  | - |
| 0.40349800 |             |             |   |
| H          | 2.84547900  | 4.28884600  | - |
| 0.71844900 |             |             |   |
| H          | -3.12006000 | -4.29522600 | - |
| 0.53729100 |             |             |   |
| H          | -2.38549400 | 4.70261800  |   |
| 0.03249900 |             |             |   |
| C          | 0.72250400  | 0.03551000  |   |
| 3.90755900 |             |             |   |
| C          | 0.86075800  | -0.01748100 |   |
| 2.51102300 |             |             |   |
| C          | -1.42329200 | 0.11346500  |   |
| 2.23159500 |             |             |   |
| C          | -1.64494200 | 0.17037300  |   |
| 3.60023300 |             |             |   |
| C          | -0.54578600 | 0.13218000  |   |
| 4.45920100 |             |             |   |
| H          | 1.60633400  | -0.00218600 |   |
| 4.53607000 |             |             |   |
| H          | -2.24976200 | 0.14160000  |   |
| 1.53901500 |             |             |   |
| H          | -2.65996500 | 0.24536100  |   |
| 3.97425800 |             |             |   |
| H          | -0.67219300 | 0.17507700  |   |
| 5.53694900 |             |             |   |
| N          | 2.10383300  | -0.12424400 |   |
| 1.88316300 |             |             |   |
| N          | -0.19685300 | 0.02418000  |   |
| 1.67124100 |             |             |   |
| N          | 4.17576100  | -0.13011700 |   |
| 3.02733600 |             |             |   |
| N          | 3.13495100  | -0.12126600 |   |
| 2.56053000 |             |             |   |
| C          | -0.57742000 | -4.87096100 |   |
| 0.06890300 |             |             |   |
| C          | -1.19001200 | -5.32965900 |   |
| 1.24574400 |             |             |   |
| C          | -0.13818600 | -5.81686200 | - |
| 0.87086000 |             |             |   |
| C          | -1.34991800 | -6.69553600 |   |
| 1.48241700 |             |             |   |



|            |             |             |   |
|------------|-------------|-------------|---|
| H          | -1.53955100 | -4.60288800 |   |
| 1.97389400 |             |             |   |
| C          | -0.29764300 | -7.18308400 | - |
| 0.63565200 |             |             |   |
| H          | 0.32387100  | -5.47000100 | - |
| 1.79061100 |             |             |   |
| C          | -0.90262500 | -7.62701600 |   |
| 0.54259300 |             |             |   |
| H          | -1.82225800 | -7.03209900 |   |
| 2.40170300 |             |             |   |
| H          | 0.04472200  | -7.90069100 | - |
| 1.37669800 |             |             |   |
| H          | -1.02725600 | -8.69099500 |   |
| 0.72547100 |             |             |   |
| C          | 4.69677600  | -0.45259700 | - |
| 1.28243900 |             |             |   |
| C          | 5.11726700  | -1.07766900 | - |
| 2.46682000 |             |             |   |
| C          | 5.67259100  | 0.00360200  | - |
| 0.38201900 |             |             |   |
| C          | 6.47512500  | -1.23608000 | - |
| 2.74709100 |             |             |   |
| H          | 4.36775800  | -1.43719800 | - |
| 3.16620800 |             |             |   |
| C          | 7.03064800  | -0.15488900 | - |
| 0.66060200 |             |             |   |
| H          | 5.35925200  | 0.47765200  |   |
| 0.54367200 |             |             |   |
| C          | 7.43640500  | -0.77420500 | - |
| 1.84503700 |             |             |   |
| H          | 6.78182500  | -1.71802500 | - |
| 3.67175000 |             |             |   |
| H          | 7.77114000  | 0.19990800  |   |
| 0.05148600 |             |             |   |
| H          | 8.49398400  | -0.89803200 | - |
| 2.06234900 |             |             |   |
| C          | 0.34010300  | 4.87207300  |   |
| 0.02167000 |             |             |   |
| C          | 1.02050900  | 5.33224000  |   |
| 1.16007100 |             |             |   |
| C          | -0.15135400 | 5.81694700  | - |
| 0.89296600 |             |             |   |
| C          | 1.19618700  | 6.69824000  |   |
| 1.38424800 |             |             |   |

|                |             |             |   |
|----------------|-------------|-------------|---|
| H              | 1.41079100  | 4.60629100  |   |
| 1.86803500     |             |             |   |
| C              | 0.02343400  | 7.18336000  | - |
| 0.67009900     |             |             |   |
| H              | -0.66589400 | 5.46915200  | - |
| 1.78408800     |             |             |   |
| C              | 0.69647600  | 7.62864500  |   |
| 0.47011000     |             |             |   |
| H              | 1.72193000  | 7.03574100  |   |
| 2.27370300     |             |             |   |
| H              | -0.35997300 | 7.90008000  | - |
| 1.39165700     |             |             |   |
| H              | 0.83336000  | 8.69275700  |   |
| 0.64315000     |             |             |   |
| C              | -5.02268000 | 0.44531000  | - |
| 0.92806500     |             |             |   |
| C              | -5.53363600 | 1.08924400  | - |
| 2.06604100     |             |             |   |
| C              | -5.92696500 | -0.03997400 |   |
| 0.02977000     |             |             |   |
| C              | -6.90951300 | 1.23894100  | - |
| 2.24409000     |             |             |   |
| H              | -4.84013100 | 1.47014100  | - |
| 2.81038100     |             |             |   |
| C              | -7.30310600 | 0.10859100  | - |
| 0.14689200     |             |             |   |
| H              | -5.54014600 | -0.53517500 |   |
| 0.91608700     |             |             |   |
| C              | -7.79897600 | 0.74846600  | - |
| 1.28522200     |             |             |   |
| H              | -7.28658500 | 1.73583000  | - |
| 3.13411900     |             |             |   |
| H              | -7.98763500 | -0.27094200 |   |
| 0.60729400     |             |             |   |
| H              | -8.87056700 | 0.86476400  | - |
| 1.42351800     |             |             |   |
| <b>ossINT7</b> |             |             |   |
| Fe             | 0.13297400  | 0.01290100  | - |
| 0.39396000     |             |             |   |
| N              | 1.66065200  | 1.32133900  | - |
| 0.47818100     |             |             |   |
| C              | -3.26382000 | 0.26466900  | - |
| 0.95571400     |             |             |   |

|            |             |             |   |
|------------|-------------|-------------|---|
| C          | 0.37760700  | 3.42606400  | - |
| 0.23542800 |             |             |   |
| C          | -2.13368900 | 3.61763300  | - |
| 0.30246400 |             |             |   |
| C          | -3.14093900 | 2.74454700  | - |
| 0.57468400 |             |             |   |
| C          | -0.90141400 | 2.86298200  | - |
| 0.34265400 |             |             |   |
| C          | -2.53580900 | 1.44362200  | - |
| 0.74098800 |             |             |   |
| H          | -4.19987000 | 2.94958400  | - |
| 0.63497700 |             |             |   |
| H          | -2.21051300 | 4.67624400  | - |
| 0.10233200 |             |             |   |
| N          | 1.45600500  | -1.50748000 | - |
| 0.51162400 |             |             |   |
| N          | -1.17232400 | 1.53222900  | - |
| 0.57554400 |             |             |   |
| N          | -1.37680900 | -1.29336700 | - |
| 0.60439900 |             |             |   |
| C          | 3.57138000  | -0.23340500 | - |
| 0.70761700 |             |             |   |
| C          | -0.11656200 | -3.40273600 | - |
| 0.29914400 |             |             |   |
| C          | -2.58083700 | -3.26227700 | - |
| 0.76890300 |             |             |   |
| C          | 2.86623000  | 3.29373900  | - |
| 0.55637600 |             |             |   |
| C          | 2.39325500  | -3.59888700 | - |
| 0.20504000 |             |             |   |
| C          | -3.44579500 | -2.24424700 | - |
| 1.02010700 |             |             |   |
| C          | 3.75055400  | 2.27947900  | - |
| 0.75197500 |             |             |   |
| C          | 3.41959700  | -2.72309300 | - |
| 0.38304600 |             |             |   |
| C          | -1.28821800 | -2.66340400 | - |
| 0.51730300 |             |             |   |
| C          | 1.56287700  | 2.69136000  | - |
| 0.38918900 |             |             |   |
| C          | 1.16822000  | -2.84192500 | - |
| 0.31957700 |             |             |   |
| C          | -2.69799700 | -1.01405200 | - |
| 0.88390800 |             |             |   |

|            |             |             |   |
|------------|-------------|-------------|---|
| C          | 3.00021800  | 1.04673200  | - |
| 0.66967700 |             |             |   |
| C          | 2.83023700  | -1.41816100 | - |
| 0.57131200 |             |             |   |
| H          | -4.49241900 | -2.31067700 | - |
| 1.27842500 |             |             |   |
| H          | 4.81157000  | 2.35112300  | - |
| 0.94062600 |             |             |   |
| H          | 4.47966600  | -2.93020900 | - |
| 0.36663800 |             |             |   |
| H          | -2.77972700 | -4.32395400 | - |
| 0.78783000 |             |             |   |
| H          | 3.06257800  | 4.35606800  | - |
| 0.55913600 |             |             |   |
| H          | 2.45455000  | -4.66116200 | - |
| 0.01957300 |             |             |   |
| C          | -0.73874600 | -0.15027700 |   |
| 4.01675800 |             |             |   |
| C          | -0.86649500 | -0.03665100 |   |
| 2.62264100 |             |             |   |
| C          | 1.41510400  | -0.13177000 |   |
| 2.33947500 |             |             |   |
| C          | 1.63880800  | -0.24698900 |   |
| 3.70672200 |             |             |   |
| C          | 0.53400400  | -0.25898800 |   |
| 4.56046900 |             |             |   |
| H          | -1.62158500 | -0.14903500 |   |
| 4.64808500 |             |             |   |
| H          | 2.23598200  | -0.11965400 |   |
| 1.63558500 |             |             |   |
| H          | 2.65189000  | -0.32753200 |   |
| 4.08518100 |             |             |   |
| H          | 0.66006800  | -0.34906100 |   |
| 5.63561900 |             |             |   |
| N          | -2.10263500 | 0.09332600  |   |
| 1.97371800 |             |             |   |
| N          | 0.19039400  | -0.03298200 |   |
| 1.79394300 |             |             |   |
| N          | -4.18900900 | 0.00184100  |   |
| 3.08995700 |             |             |   |
| N          | -3.14402700 | 0.03577300  |   |
| 2.63439500 |             |             |   |
| C          | 0.50002900  | 4.89886300  | - |
| 0.01862100 |             |             |   |

|            |             |             |   |
|------------|-------------|-------------|---|
| C          | 1.10272800  | 5.39296500  |   |
| 1.14910700 |             |             |   |
| C          | 0.03878400  | 5.81749400  | - |
| 0.97491300 |             |             |   |
| C          | 1.23313000  | 6.76617400  |   |
| 1.35985500 |             |             |   |
| H          | 1.46755500  | 4.68783200  |   |
| 1.89084000 |             |             |   |
| C          | 0.16860500  | 7.19100400  | - |
| 0.76556600 |             |             |   |
| H          | -0.41748700 | 5.44343300  | - |
| 1.88688300 |             |             |   |
| C          | 0.76507100  | 7.67000000  |   |
| 0.40325600 |             |             |   |
| H          | 1.69819000  | 7.13005100  |   |
| 2.27242100 |             |             |   |
| H          | -0.19038300 | 7.88696700  | - |
| 1.51928300 |             |             |   |
| H          | 0.86664500  | 8.73967200  |   |
| 0.56608700 |             |             |   |
| C          | -4.73081600 | 0.38953600  | - |
| 1.20970100 |             |             |   |
| C          | -5.19771500 | 1.02258500  | - |
| 2.37248400 |             |             |   |
| C          | -5.67150000 | -0.10005200 | - |
| 0.28954100 |             |             |   |
| C          | -6.56584600 | 1.15725100  | - |
| 2.61190900 |             |             |   |
| H          | -4.47596100 | 1.40697800  | - |
| 3.08763900 |             |             |   |
| C          | -7.03983300 | 0.03458900  | - |
| 0.52732800 |             |             |   |
| H          | -5.32302100 | -0.58181100 |   |
| 0.61931000 |             |             |   |
| C          | -7.49163100 | 0.66279800  | - |
| 1.69018200 |             |             |   |
| H          | -6.90829800 | 1.64584800  | - |
| 3.52038300 |             |             |   |
| H          | -7.75233200 | -0.34583900 |   |
| 0.19991500 |             |             |   |
| H          | -8.55724200 | 0.76806700  | - |
| 1.87569400 |             |             |   |
| C          | -0.25402900 | -4.87732800 | - |
| 0.10469100 |             |             |   |

|            |             |             |   |
|------------|-------------|-------------|---|
| C          | -0.92539700 | -5.38113400 |   |
| 1.02060800 |             |             |   |
| C          | 0.26134900  | -5.78790500 | - |
| 1.04076800 |             |             |   |
| C          | -1.07070000 | -6.75592500 |   |
| 1.21010000 |             |             |   |
| H          | -1.33256400 | -4.68214800 |   |
| 1.74595000 |             |             |   |
| C          | 0.11704700  | -7.16305600 | - |
| 0.85255300 |             |             |   |
| H          | 0.77110100  | -5.40631500 | - |
| 1.92076500 |             |             |   |
| C          | -0.54843000 | -7.65173400 |   |
| 0.27425500 |             |             |   |
| H          | -1.59000400 | -7.12729500 |   |
| 2.08979200 |             |             |   |
| H          | 0.51858800  | -7.85270400 | - |
| 1.59044500 |             |             |   |
| H          | -0.66158900 | -8.72264800 |   |
| 0.42038200 |             |             |   |
| C          | 5.05344900  | -0.35260700 | - |
| 0.85117700 |             |             |   |
| C          | 5.60919700  | -0.98799600 | - |
| 1.97295800 |             |             |   |
| C          | 5.92068800  | 0.15024000  |   |
| 0.13171500 |             |             |   |
| C          | 6.99215100  | -1.11294700 | - |
| 2.11051200 |             |             |   |
| H          | 4.94478300  | -1.38160900 | - |
| 2.73693300 |             |             |   |
| C          | 7.30384100  | 0.02653400  | - |
| 0.00450900 |             |             |   |
| H          | 5.49923400  | 0.63950700  |   |
| 1.00545800 |             |             |   |
| C          | 7.84424700  | -0.60552700 | - |
| 1.12683600 |             |             |   |
| H          | 7.40398700  | -1.60352000 | - |
| 2.98856000 |             |             |   |
| H          | 7.95908800  | 0.41935800  |   |
| 0.76864700 |             |             |   |
| H          | 8.92134900  | -0.70246700 | - |
| 1.23367100 |             |             |   |

**<sup>3</sup>INT7**

|            |             |             |   |
|------------|-------------|-------------|---|
| Fe         | 0.18245400  | 0.19438300  | - |
| 0.45980400 |             |             |   |
| N          | 2.00385600  | 1.02690300  | - |
| 0.36554200 |             |             |   |
| C          | -3.02816300 | 1.39469400  | - |
| 0.84541700 |             |             |   |
| C          | 1.33858800  | 3.37810200  |   |
| 0.04257000 |             |             |   |
| C          | -1.02474600 | 4.23799200  |   |
| 0.06491400 |             |             |   |
| C          | -2.23396400 | 3.69591600  | - |
| 0.23934500 |             |             |   |
| C          | -0.04323700 | 3.18793400  | - |
| 0.08010200 |             |             |   |
| C          | -2.00603500 | 2.30198300  | - |
| 0.53703000 |             |             |   |
| H          | -3.19959200 | 4.17972800  | - |
| 0.23800300 |             |             |   |
| H          | -0.80872700 | 5.25402400  |   |
| 0.36054600 |             |             |   |
| N          | 1.03992300  | -1.61991900 | - |
| 0.65698300 |             |             |   |
| N          | -0.66575900 | 2.00522200  | - |
| 0.41594100 |             |             |   |
| N          | -1.62637000 | -0.63567900 | - |
| 0.69656400 |             |             |   |
| C          | 3.42897000  | -0.96662400 | - |
| 0.71443900 |             |             |   |
| C          | -0.99149600 | -3.02367100 | - |
| 0.53097500 |             |             |   |
| C          | -3.32240600 | -2.18713200 | - |
| 0.94127600 |             |             |   |
| C          | 3.70099100  | 2.59425700  | - |
| 0.28216700 |             |             |   |
| C          | 1.36486400  | -3.89890700 | - |
| 0.44473900 |             |             |   |
| C          | -3.88114300 | -0.95720700 | - |
| 1.10319900 |             |             |   |
| C          | 4.28221000  | 1.39384000  | - |
| 0.54868500 |             |             |   |
| C          | 2.59531100  | -3.32893100 | - |
| 0.56194800 |             |             |   |
| C          | -1.91454900 | -1.98174800 | - |
| 0.69420500 |             |             |   |

|            |             |             |   |
|------------|-------------|-------------|---|
| C          | 2.28040700  | 2.36156100  | - |
| 0.17007500 |             |             |   |
| C          | 0.39576300  | -2.83370400 | - |
| 0.53520300 |             |             |   |
| C          | -2.82793500 | 0.01083000  | - |
| 0.90828200 |             |             |   |
| C          | 3.22475600  | 0.41149100  | - |
| 0.57023100 |             |             |   |
| C          | 2.38854600  | -1.90639000 | - |
| 0.68365700 |             |             |   |
| H          | -4.91113000 | -0.72016700 | - |
| 1.32404100 |             |             |   |
| H          | 5.32799500  | 1.18577100  | - |
| 0.71973600 |             |             |   |
| H          | 3.55886800  | -3.81655100 | - |
| 0.53938000 |             |             |   |
| H          | -3.80476700 | -3.15107300 | - |
| 1.01307300 |             |             |   |
| H          | 4.17894400  | 3.55922900  | - |
| 0.19706400 |             |             |   |
| H          | 1.12915400  | -4.94456200 | - |
| 0.31229100 |             |             |   |
| C          | -1.18094000 | -1.93522600 |   |
| 3.28144500 |             |             |   |
| C          | -1.04033200 | -0.75776700 |   |
| 2.52892100 |             |             |   |
| C          | 1.22099400  | -1.06575400 |   |
| 2.31233400 |             |             |   |
| C          | 1.19471600  | -2.24344800 |   |
| 3.05389500 |             |             |   |
| C          | -0.03966400 | -2.68872200 |   |
| 3.53329800 |             |             |   |
| H          | -2.15229400 | -2.24396400 |   |
| 3.65550100 |             |             |   |
| H          | 2.14141700  | -0.69235200 |   |
| 1.87512300 |             |             |   |
| H          | 2.10722600  | -2.80293500 |   |
| 3.22732000 |             |             |   |
| H          | -0.11494600 | -3.61237600 |   |
| 4.10005200 |             |             |   |
| N          | -2.11740000 | 0.10878300  |   |
| 2.23217600 |             |             |   |
| N          | 0.12791500  | -0.34067900 |   |
| 2.03462600 |             |             |   |



|            |             |             |   |
|------------|-------------|-------------|---|
| N          | -4.37366700 | -0.53213400 |   |
| 2.57407700 |             |             |   |
| N          | -3.26635400 | -0.29530200 |   |
| 2.43825400 |             |             |   |
| C          | 1.85027200  | 4.74477900  |   |
| 0.36083500 |             |             |   |
| C          | 2.54963400  | 4.97800200  |   |
| 1.55550400 |             |             |   |
| C          | 1.65975000  | 5.81619300  | - |
| 0.52607700 |             |             |   |
| C          | 3.03984600  | 6.24881500  |   |
| 1.85856800 |             |             |   |
| H          | 2.70178900  | 4.15277200  |   |
| 2.24545300 |             |             |   |
| C          | 2.14999700  | 7.08729200  | - |
| 0.22415600 |             |             |   |
| H          | 1.12770000  | 5.64128700  | - |
| 1.45681400 |             |             |   |
| C          | 2.84095700  | 7.30780200  |   |
| 0.96968400 |             |             |   |
| H          | 3.57416200  | 6.41225100  |   |
| 2.79082500 |             |             |   |
| H          | 1.99717300  | 7.90402700  | - |
| 0.92477000 |             |             |   |
| H          | 3.22289100  | 8.29764900  |   |
| 1.20490400 |             |             |   |
| C          | -4.40148100 | 1.93952200  | - |
| 1.06875900 |             |             |   |
| C          | -4.65047300 | 2.78923000  | - |
| 2.15861500 |             |             |   |
| C          | -5.46131600 | 1.63525500  | - |
| 0.19993100 |             |             |   |
| C          | -5.92405600 | 3.31517500  | - |
| 2.37779600 |             |             |   |
| H          | -3.83448800 | 3.03182500  | - |
| 2.83351500 |             |             |   |
| C          | -6.73534600 | 2.16112700  | - |
| 0.41834700 |             |             |   |
| H          | -5.28144600 | 0.98550400  |   |
| 0.65085400 |             |             |   |
| C          | -6.97134300 | 3.00214000  | - |
| 1.50814400 |             |             |   |
| H          | -6.09844400 | 3.96706200  | - |
| 3.22978800 |             |             |   |

|            |             |             |   |
|------------|-------------|-------------|---|
| H          | -7.54207700 | 1.91713000  |   |
| 0.26785900 |             |             |   |
| H          | -7.96357900 | 3.41168200  | - |
| 1.67769900 |             |             |   |
| C          | -1.52846900 | -4.40745100 | - |
| 0.37116200 |             |             |   |
| C          | -2.29525800 | -4.73275100 |   |
| 0.75914500 |             |             |   |
| C          | -1.29525900 | -5.40210200 | - |
| 1.33338300 |             |             |   |
| C          | -2.81010200 | -6.01850200 |   |
| 0.92674300 |             |             |   |
| H          | -2.47824500 | -3.96524600 |   |
| 1.50575900 |             |             |   |
| C          | -1.80943800 | -6.68884000 | - |
| 1.16674500 |             |             |   |
| H          | -0.71214300 | -5.15501900 | - |
| 2.21590600 |             |             |   |
| C          | -2.56767200 | -7.00138700 | - |
| 0.03591300 |             |             |   |
| H          | -3.39932600 | -6.25347100 |   |
| 1.80944800 |             |             |   |
| H          | -1.62345900 | -7.44548800 | - |
| 1.92444900 |             |             |   |
| H          | -2.96908900 | -8.00300300 |   |
| 0.09274900 |             |             |   |
| C          | 4.82598300  | -1.47771200 | - |
| 0.84557100 |             |             |   |
| C          | 5.76140100  | -1.30488100 |   |
| 0.18712200 |             |             |   |
| C          | 5.22561000  | -2.16174700 | - |
| 2.00462200 |             |             |   |
| C          | 7.06133300  | -1.79640500 |   |
| 0.06271200 |             |             |   |
| H          | 5.45883400  | -0.78218100 |   |
| 1.09024600 |             |             |   |
| C          | 6.52521000  | -2.65401500 | - |
| 2.13024600 |             |             |   |
| H          | 4.50680000  | -2.30153200 | - |
| 2.80701900 |             |             |   |
| C          | 7.44759700  | -2.47238200 | - |
| 1.09709300 |             |             |   |
| H          | 7.77071600  | -1.65586700 |   |
| 0.87410100 |             |             |   |

|                         |             |             |   |
|-------------------------|-------------|-------------|---|
| H                       | 6.81812500  | -3.17620900 | - |
| 3.03727400              |             |             |   |
| H                       | 8.45985500  | -2.85543700 | - |
| 1.19465800              |             |             |   |
| <b><sup>5</sup>INT7</b> |             |             |   |
| Fe                      | 0.11157000  | 0.04073800  | - |
| 0.28076600              |             |             |   |
| N                       | 1.70902900  | 1.40469400  | - |
| 0.42327100              |             |             |   |
| C                       | -3.32511500 | 0.27657600  | - |
| 0.77105800              |             |             |   |
| C                       | 0.37495300  | 3.49115300  | - |
| 0.41641500              |             |             |   |
| C                       | -2.15155000 | 3.67666400  | - |
| 0.34006600              |             |             |   |
| C                       | -3.17803400 | 2.78558000  | - |
| 0.46178500              |             |             |   |
| C                       | -0.92042400 | 2.92702400  | - |
| 0.44902700              |             |             |   |
| C                       | -2.59024900 | 1.47665400  | - |
| 0.63398700              |             |             |   |
| H                       | -4.23711000 | 2.99472900  | - |
| 0.41918900              |             |             |   |
| H                       | -2.22342200 | 4.74277400  | - |
| 0.18131900              |             |             |   |
| N                       | 1.48010400  | -1.50630900 | - |
| 0.57751100              |             |             |   |
| N                       | -1.22008700 | 1.59205300  | - |
| 0.60503600              |             |             |   |
| N                       | -1.45109000 | -1.32586200 | - |
| 0.57829600              |             |             |   |
| C                       | 3.59390800  | -0.19052900 | - |
| 0.55160400              |             |             |   |
| C                       | -0.12204700 | -3.41159900 | - |
| 0.54873800              |             |             |   |
| C                       | -2.62850000 | -3.27330000 | - |
| 0.93320900              |             |             |   |
| C                       | 2.89850400  | 3.36282800  | - |
| 0.65824200              |             |             |   |
| C                       | 2.39308000  | -3.60112200 | - |
| 0.32023200              |             |             |   |
| C                       | -3.51671700 | -2.24564500 | - |
| 1.01524400              |             |             |   |

|            |             |             |   |
|------------|-------------|-------------|---|
| C          | 3.79452000  | 2.33985800  | - |
| 0.71452400 |             |             |   |
| C          | 3.42603900  | -2.70957100 | - |
| 0.34318400 |             |             |   |
| C          | -1.32721200 | -2.68797200 | - |
| 0.66033500 |             |             |   |
| C          | 1.58567700  | 2.76947400  | - |
| 0.47622200 |             |             |   |
| C          | 1.17179100  | -2.84603200 | - |
| 0.48465000 |             |             |   |
| C          | -2.77259900 | -1.01997600 | - |
| 0.78172600 |             |             |   |
| C          | 3.04180400  | 1.10808400  | - |
| 0.55816400 |             |             |   |
| C          | 2.85144200  | -1.39431500 | - |
| 0.51196900 |             |             |   |
| H          | -4.57223500 | -2.30322400 | - |
| 1.23844500 |             |             |   |
| H          | 4.86106300  | 2.40524700  | - |
| 0.87424300 |             |             |   |
| H          | 4.47982300  | -2.92297500 | - |
| 0.23748900 |             |             |   |
| H          | -2.82233000 | -4.32639000 | - |
| 1.07746900 |             |             |   |
| H          | 3.09691900  | 4.41967000  | - |
| 0.76364700 |             |             |   |
| H          | 2.45426800  | -4.67220300 | - |
| 0.19380500 |             |             |   |
| C          | -0.67264700 | -0.41396000 |   |
| 4.20210300 |             |             |   |
| C          | -0.80488200 | -0.14697700 |   |
| 2.83078700 |             |             |   |
| C          | 1.47342500  | -0.25468300 |   |
| 2.51246200 |             |             |   |
| C          | 1.70517100  | -0.52529800 |   |
| 3.85735900 |             |             |   |
| C          | 0.60488900  | -0.60930100 |   |
| 4.71381500 |             |             |   |
| H          | -1.54857100 | -0.46190900 |   |
| 4.84123800 |             |             |   |
| H          | 2.28618100  | -0.17876500 |   |
| 1.80002200 |             |             |   |
| H          | 2.71809400  | -0.66703800 |   |
| 4.21782900 |             |             |   |

|            |             |             |   |
|------------|-------------|-------------|---|
| H          | 0.73843000  | -0.81987800 |   |
| 5.77106700 |             |             |   |
| N          | -2.03367300 | 0.09116300  |   |
| 2.19164500 |             |             |   |
| N          | 0.24522900  | -0.07761100 |   |
| 2.00057100 |             |             |   |
| N          | -4.12425500 | -0.12578600 |   |
| 3.28535200 |             |             |   |
| N          | -3.08066000 | -0.04219200 |   |
| 2.83486700 |             |             |   |
| C          | 0.47689900  | 4.98022700  | - |
| 0.34756100 |             |             |   |
| C          | 1.11446800  | 5.60185900  |   |
| 0.73842200 |             |             |   |
| C          | -0.04907500 | 5.79017000  | - |
| 1.36729100 |             |             |   |
| C          | 1.21942600  | 6.99153100  |   |
| 0.80606300 |             |             |   |
| H          | 1.52533800  | 4.98262200  |   |
| 1.53083100 |             |             |   |
| C          | 0.05561900  | 7.17988500  | - |
| 1.30121800 |             |             |   |
| H          | -0.53622500 | 5.31770300  | - |
| 2.21534900 |             |             |   |
| C          | 0.68961600  | 7.78556400  | - |
| 0.21371400 |             |             |   |
| H          | 1.71195100  | 7.45416100  |   |
| 1.65744900 |             |             |   |
| H          | -0.35284300 | 7.78942800  | - |
| 2.10306400 |             |             |   |
| H          | 0.77142300  | 8.86801300  | - |
| 0.16219000 |             |             |   |
| C          | -4.80796200 | 0.39652400  | - |
| 0.90885700 |             |             |   |
| C          | -5.67121500 | -0.18106700 |   |
| 0.03665600 |             |             |   |
| C          | -5.37270800 | 1.09472100  | - |
| 1.98915500 |             |             |   |
| C          | -7.05546900 | -0.06301000 | - |
| 0.09180600 |             |             |   |
| H          | -5.24907300 | -0.72038200 |   |
| 0.87916600 |             |             |   |
| C          | -6.75668200 | 1.21266600  | - |
| 2.11954200 |             |             |   |

|            |             |             |   |
|------------|-------------|-------------|---|
| H          | -4.71352300 | 1.54103700  | - |
| 2.72811200 |             |             |   |
| C          | -7.60338000 | 0.63434200  | - |
| 1.17079000 |             |             |   |
| H          | -7.70507400 | -0.51144900 |   |
| 0.65531200 |             |             |   |
| H          | -7.17370000 | 1.75233900  | - |
| 2.96582800 |             |             |   |
| H          | -8.68149900 | 0.72665500  | - |
| 1.27150200 |             |             |   |
| C          | 5.08288200  | -0.30490200 | - |
| 0.58092900 |             |             |   |
| C          | 5.86743500  | 0.25024700  |   |
| 0.44336600 |             |             |   |
| C          | 5.73276900  | -0.97025500 | - |
| 1.63346700 |             |             |   |
| C          | 7.25830300  | 0.14359700  |   |
| 0.41776100 |             |             |   |
| H          | 5.37446600  | 0.76784200  |   |
| 1.26166200 |             |             |   |
| C          | 7.12348700  | -1.07817100 | - |
| 1.66039200 |             |             |   |
| H          | 5.13491000  | -1.39840300 | - |
| 2.43283700 |             |             |   |
| C          | 7.89140900  | -0.52187500 | - |
| 0.63457800 |             |             |   |
| H          | 7.84716700  | 0.57674900  |   |
| 1.22217700 |             |             |   |
| H          | 7.60769500  | -1.59215300 | - |
| 2.48661200 |             |             |   |
| H          | 8.97470700  | -0.60537600 | - |
| 0.65569400 |             |             |   |
| C          | -0.22554700 | -4.90201700 | - |
| 0.52938100 |             |             |   |
| C          | -0.92603800 | -5.55475100 |   |
| 0.49800800 |             |             |   |
| C          | 0.36124300  | -5.68251500 | - |
| 1.53885800 |             |             |   |
| C          | -1.03335200 | -6.94572600 |   |
| 0.51904400 |             |             |   |
| H          | -1.38504900 | -4.95853400 |   |
| 1.28164000 |             |             |   |
| C          | 0.25478200  | -7.07354000 | - |
| 1.51923700 |             |             |   |

|                |             |             |   |
|----------------|-------------|-------------|---|
| H              | 0.89715900  | -5.18600200 | - |
| 2.34263700     |             |             |   |
| C              | -0.44234300 | -7.71021800 | - |
| 0.48961200     |             |             |   |
| H              | -1.57587600 | -7.43250100 |   |
| 1.32539000     |             |             |   |
| H              | 0.71105800  | -7.65978800 | - |
| 2.31263200     |             |             |   |
| H              | -0.52589600 | -8.79364600 | - |
| 0.47450900     |             |             |   |
| <b>CSS-TS7</b> |             |             |   |
| Fe             | -0.35112700 | 0.14373400  | - |
| 0.73017600     |             |             |   |
| N              | -2.00914600 | -1.01147200 | - |
| 0.80356800     |             |             |   |
| C              | 0.23787400  | 3.51879100  | - |
| 0.66671800     |             |             |   |
| C              | -3.75989900 | 0.74056800  | - |
| 0.77344700     |             |             |   |
| C              | -3.34021800 | 3.20055700  | - |
| 0.47173800     |             |             |   |
| C              | -2.22262500 | 3.96796600  | - |
| 0.37387600     |             |             |   |
| C              | -2.89795600 | 1.84020100  | - |
| 0.68111300     |             |             |   |
| C              | -1.09187600 | 3.09059500  | - |
| 0.57998000     |             |             |   |
| H              | -2.16256000 | 5.03295300  | - |
| 0.20491400     |             |             |   |
| H              | -4.37111900 | 3.51565200  | - |
| 0.40273400     |             |             |   |
| N              | 0.76762900  | -1.50116600 | - |
| 1.04598700     |             |             |   |
| N              | -1.52233700 | 1.79188500  | - |
| 0.74628400     |             |             |   |
| N              | 1.23813700  | 1.29915200  | - |
| 1.10774900     |             |             |   |
| C              | -0.95991300 | -3.25278000 | - |
| 0.79060100     |             |             |   |
| C              | 2.95068100  | -0.43494700 | - |
| 1.51888800     |             |             |   |
| C              | 3.37253200  | 2.03700200  | - |
| 1.61991000     |             |             |   |

|            |             |             |   |
|------------|-------------|-------------|---|
| C          | -4.21523900 | -1.72613900 | - |
| 0.86032600 |             |             |   |
| C          | 2.57833800  | -2.91218400 | - |
| 1.35489300 |             |             |   |
| C          | 2.62945800  | 3.13695900  | - |
| 1.32952300 |             |             |   |
| C          | -3.43530800 | -2.83803500 | - |
| 0.81324900 |             |             |   |
| C          | 1.49270600  | -3.69962000 | - |
| 1.12795100 |             |             |   |
| C          | 2.51162600  | 0.88988700  | - |
| 1.44154500 |             |             |   |
| C          | -3.32513800 | -0.58817600 | - |
| 0.84698600 |             |             |   |
| C          | 2.12001000  | -1.54217300 | - |
| 1.31010500 |             |             |   |
| C          | 1.29977600  | 2.67004000  | - |
| 1.00632100 |             |             |   |
| C          | -2.06153900 | -2.38898200 | - |
| 0.77792400 |             |             |   |
| C          | 0.36054800  | -2.81588400 | - |
| 0.96019400 |             |             |   |
| H          | 2.93446500  | 4.17280100  | - |
| 1.35528800 |             |             |   |
| H          | -3.75136800 | -3.87083100 | - |
| 0.82419200 |             |             |   |
| H          | 1.45623800  | -4.77798900 | - |
| 1.08115600 |             |             |   |
| H          | 4.40898500  | 1.99525300  | - |
| 1.92037400 |             |             |   |
| H          | -5.29328500 | -1.67034400 | - |
| 0.90033400 |             |             |   |
| H          | 3.59798800  | -3.22134900 | - |
| 1.53229300 |             |             |   |
| C          | 4.39509900  | -0.68530300 | - |
| 1.81349800 |             |             |   |
| C          | 4.79008900  | -1.27308900 | - |
| 3.02468300 |             |             |   |
| C          | 5.38201400  | -0.34121200 | - |
| 0.87693100 |             |             |   |
| C          | 6.13869300  | -1.51196000 | - |
| 3.29393800 |             |             |   |
| H          | 4.03006900  | -1.54002900 | - |
| 3.75377800 |             |             |   |



|            |             |             |   |
|------------|-------------|-------------|---|
| C          | 6.73033700  | -0.57934700 | - |
| 1.14619700 |             |             |   |
| H          | 5.08193800  | 0.11339400  |   |
| 0.06174000 |             |             |   |
| C          | 7.11310600  | -1.16592200 | - |
| 2.35484400 |             |             |   |
| H          | 6.42797400  | -1.96422000 | - |
| 4.23902000 |             |             |   |
| H          | 7.48216900  | -0.30853700 | - |
| 0.40927100 |             |             |   |
| H          | 8.16338900  | -1.35111800 | - |
| 2.56415800 |             |             |   |
| C          | 0.55503700  | 4.95755800  | - |
| 0.42272800 |             |             |   |
| C          | 1.36332200  | 5.31665000  |   |
| 0.66784800 |             |             |   |
| C          | 0.07912300  | 5.97086000  | - |
| 1.26885000 |             |             |   |
| C          | 1.67916000  | 6.65345500  |   |
| 0.91199300 |             |             |   |
| H          | 1.74466800  | 4.53445500  |   |
| 1.31872100 |             |             |   |
| C          | 0.39418600  | 7.30854900  | - |
| 1.02528600 |             |             |   |
| H          | -0.53471700 | 5.69945500  | - |
| 2.12297500 |             |             |   |
| C          | 1.19360700  | 7.65419500  |   |
| 0.06678900 |             |             |   |
| H          | 2.30446000  | 6.91341900  |   |
| 1.76221100 |             |             |   |
| H          | 0.02089300  | 8.08011800  | - |
| 1.69361500 |             |             |   |
| H          | 1.43993100  | 8.69574000  |   |
| 0.25535600 |             |             |   |
| C          | -5.23440900 | 0.99262100  | - |
| 0.74312600 |             |             |   |
| C          | -5.86826400 | 1.38918100  |   |
| 0.44385200 |             |             |   |
| C          | -6.01216000 | 0.82665600  | - |
| 1.89829800 |             |             |   |
| C          | -7.24462700 | 1.61810000  |   |
| 0.47573700 |             |             |   |
| H          | -5.26968800 | 1.51957400  |   |
| 1.34159800 |             |             |   |

|            |             |             |   |
|------------|-------------|-------------|---|
| C          | -7.38950500 | 1.05186700  | - |
| 1.86762800 |             |             |   |
| H          | -5.52714200 | 0.51848100  | - |
| 2.82037000 |             |             |   |
| C          | -8.00962900 | 1.44896900  | - |
| 0.68073100 |             |             |   |
| H          | -7.71984400 | 1.92430000  |   |
| 1.40412500 |             |             |   |
| H          | -7.97730600 | 0.92070300  | - |
| 2.77236600 |             |             |   |
| H          | -9.08165600 | 1.62551700  | - |
| 0.65706400 |             |             |   |
| C          | -1.22781400 | -4.71827700 | - |
| 0.67370600 |             |             |   |
| C          | -0.95843100 | -5.60081800 | - |
| 1.73141800 |             |             |   |
| C          | -1.77854800 | -5.24027700 |   |
| 0.50861400 |             |             |   |
| C          | -1.21601900 | -6.96666100 | - |
| 1.60484500 |             |             |   |
| H          | -0.54869000 | -5.20506800 | - |
| 2.65618600 |             |             |   |
| C          | -2.03701900 | -6.60562600 |   |
| 0.63660600 |             |             |   |
| H          | -2.00149800 | -4.56014600 |   |
| 1.32566900 |             |             |   |
| C          | -1.75341600 | -7.47439600 | - |
| 0.41965200 |             |             |   |
| H          | -1.00312700 | -7.63364400 | - |
| 2.43615000 |             |             |   |
| H          | -2.45863400 | -6.99036800 |   |
| 1.56163300 |             |             |   |
| H          | -1.95354400 | -8.53797300 | - |
| 0.32174200 |             |             |   |
| N          | 2.01435100  | 0.71201300  |   |
| 1.55387500 |             |             |   |
| N          | 2.92350700  | 1.58616600  |   |
| 1.69931500 |             |             |   |
| N          | 4.05607700  | 1.59831000  |   |
| 2.02204100 |             |             |   |
| C          | 0.71822200  | 0.96130700  |   |
| 1.99377400 |             |             |   |
| C          | 0.49292500  | 1.64714100  |   |
| 3.20072100 |             |             |   |

|            |             |             |
|------------|-------------|-------------|
| C          | -1.49982100 | 0.33811100  |
| 1.89600700 |             |             |
| C          | -0.77829700 | 1.66820100  |
| 3.75182700 |             |             |
| H          | 1.33485900  | 2.12055500  |
| 3.69510000 |             |             |
| C          | -1.79010500 | 0.95825900  |
| 3.10305900 |             |             |
| H          | -2.26722700 | -0.17982500 |
| 1.34174300 |             |             |
| H          | -0.96817900 | 2.19653400  |
| 4.68165200 |             |             |
| H          | -2.79626200 | 0.90123200  |
| 3.50418000 |             |             |
| N          | -0.28683000 | 0.37253800  |
| 1.30248100 |             |             |
| C          | 3.25391500  | -0.89876600 |
| 2.81834200 |             |             |
| C          | 4.31426500  | -0.25130700 |
| 2.78787700 |             |             |
| C          | 2.14698500  | -1.77081500 |
| 3.04018300 |             |             |
| C          | 1.87267400  | -2.82082200 |
| 2.14783200 |             |             |
| C          | 1.29885000  | -1.56224200 |
| 4.14714000 |             |             |
| C          | 0.77484600  | -3.64831100 |
| 2.36136200 |             |             |
| H          | 2.50612500  | -2.96401200 |
| 1.28113900 |             |             |
| C          | 0.19675700  | -2.38948700 |
| 4.34643100 |             |             |
| H          | 1.50816800  | -0.74695200 |
| 4.83197300 |             |             |
| C          | -0.06781600 | -3.43428200 |
| 3.45533700 |             |             |
| H          | 0.56683400  | -4.45001600 |
| 1.66124700 |             |             |
| H          | -0.45637200 | -2.21858100 |
| 5.19780500 |             |             |
| H          | -0.92763100 | -4.08009900 |
| 3.61287100 |             |             |
| H          | 5.35326300  | -0.17653500 |
| 3.03681300 |             |             |

**oss-TS7**

|            |             |             |   |
|------------|-------------|-------------|---|
| Fe         | -0.31693800 | 0.08349200  | - |
| 0.85303000 |             |             |   |
| N          | -2.11211800 | -0.84100900 | - |
| 0.82857000 |             |             |   |
| C          | 0.71311800  | 3.36260700  | - |
| 0.86768300 |             |             |   |
| C          | -3.61688000 | 1.12654100  | - |
| 0.78492800 |             |             |   |
| C          | -2.87479600 | 3.51993800  | - |
| 0.62902600 |             |             |   |
| C          | -1.66472100 | 4.13926600  | - |
| 0.59780900 |             |             |   |
| C          | -2.61776600 | 2.10683300  | - |
| 0.77958500 |             |             |   |
| C          | -0.66229700 | 3.11402300  | - |
| 0.77741200 |             |             |   |
| H          | -1.46300500 | 5.19364800  | - |
| 0.48008100 |             |             |   |
| H          | -3.85368600 | 3.96916900  | - |
| 0.54795700 |             |             |   |
| N          | 0.58704900  | -1.70171300 | - |
| 1.10363200 |             |             |   |
| N          | -1.26211300 | 1.87787300  | - |
| 0.87504200 |             |             |   |
| N          | 1.43313900  | 1.01328700  | - |
| 1.17121600 |             |             |   |
| C          | -1.36171200 | -3.20076200 | - |
| 0.81422300 |             |             |   |
| C          | 2.92007400  | -0.94471000 | - |
| 1.44079100 |             |             |   |
| C          | 3.67458000  | 1.44428100  | - |
| 1.56029400 |             |             |   |
| C          | -4.39054400 | -1.26031600 | - |
| 0.77066600 |             |             |   |
| C          | 2.20722000  | -3.34509300 | - |
| 1.27390000 |             |             |   |
| C          | 3.06366600  | 2.64315100  | - |
| 1.37416400 |             |             |   |
| C          | -3.76055700 | -2.46461000 | - |
| 0.74598500 |             |             |   |
| C          | 1.01557500  | -3.97446500 | - |
| 1.08385100 |             |             |   |

|            |             |             |   |
|------------|-------------|-------------|---|
| C          | 2.65904200  | 0.42822000  | - |
| 1.40353200 |             |             |   |
| C          | -3.36077700 | -0.24917200 | - |
| 0.82282000 |             |             |   |
| C          | 1.93446100  | -1.92739100 | - |
| 1.28841100 |             |             |   |
| C          | 1.66668700  | 2.36788300  | - |
| 1.12095600 |             |             |   |
| C          | -2.34009300 | -2.19972100 | - |
| 0.78036000 |             |             |   |
| C          | 0.00516900  | -2.94590300 | - |
| 0.99305600 |             |             |   |
| H          | 3.50425700  | 3.62812100  | - |
| 1.41979500 |             |             |   |
| H          | -4.20894500 | -3.44697100 | - |
| 0.72362000 |             |             |   |
| H          | 0.83435500  | -5.03628700 | - |
| 1.00561500 |             |             |   |
| H          | 4.71408100  | 1.25509500  | - |
| 1.78304700 |             |             |   |
| H          | -5.45272000 | -1.06461600 | - |
| 0.75771500 |             |             |   |
| H          | 3.18437900  | -3.79205800 | - |
| 1.38300000 |             |             |   |
| C          | 4.33665700  | -1.38888700 | - |
| 1.61478200 |             |             |   |
| C          | 4.74717200  | -2.05461300 | - |
| 2.77942300 |             |             |   |
| C          | 5.28102100  | -1.14922500 | - |
| 0.60450800 |             |             |   |
| C          | 6.07055200  | -2.47172600 | - |
| 2.93139200 |             |             |   |
| H          | 4.02017200  | -2.24053600 | - |
| 3.56519000 |             |             |   |
| C          | 6.60403900  | -1.56550800 | - |
| 0.75691900 |             |             |   |
| H          | 4.96512300  | -0.63857300 | - |
| 0.29990600 |             |             |   |
| C          | 7.00300700  | -2.22824900 | - |
| 1.92021400 |             |             |   |
| H          | 6.37377700  | -2.98242400 | - |
| 3.84166900 |             |             |   |
| H          | 7.32302700  | -1.37472600 | - |
| 0.03573900 |             |             |   |

|            |             |             |   |
|------------|-------------|-------------|---|
| H          | 8.03362700  | -2.55227400 | - |
| 2.03852900 |             |             |   |
| C          | 1.20273700  | 4.76248500  | - |
| 0.68821700 |             |             |   |
| C          | 2.01719200  | 5.08259400  |   |
| 0.40995500 |             |             |   |
| C          | 0.87603400  | 5.77701800  | - |
| 1.60088500 |             |             |   |
| C          | 2.48615000  | 6.38345000  |   |
| 0.59486700 |             |             |   |
| H          | 2.28337200  | 4.29816500  |   |
| 1.11311300 |             |             |   |
| C          | 1.34403400  | 7.07895900  | - |
| 1.41639300 |             |             |   |
| H          | 0.25579400  | 5.53421800  | - |
| 2.45905700 |             |             |   |
| C          | 2.14921300  | 7.38657100  | - |
| 0.31719700 |             |             |   |
| H          | 3.11458000  | 6.61352300  |   |
| 1.45137200 |             |             |   |
| H          | 1.08502300  | 7.85145300  | - |
| 2.13574700 |             |             |   |
| H          | 2.51477800  | 8.40000200  | - |
| 0.17458300 |             |             |   |
| C          | -5.04240300 | 1.57094900  | - |
| 0.69208500 |             |             |   |
| C          | -5.54773300 | 2.09474900  |   |
| 0.50736000 |             |             |   |
| C          | -5.90182100 | 1.46470100  | - |
| 1.79517200 |             |             |   |
| C          | -6.87824100 | 2.50492500  |   |
| 0.60219500 |             |             |   |
| H          | -4.88400900 | 2.18086300  |   |
| 1.36376600 |             |             |   |
| C          | -7.23390000 | 1.87168000  | - |
| 1.70134200 |             |             |   |
| H          | -5.51636700 | 1.05965800  | - |
| 2.72672600 |             |             |   |
| C          | -7.72576800 | 2.39339400  | - |
| 0.50265800 |             |             |   |
| H          | -7.25389700 | 2.90778300  |   |
| 1.53925400 |             |             |   |
| H          | -7.88618100 | 1.78476300  | - |
| 2.56633300 |             |             |   |

|            |             |             |   |
|------------|-------------|-------------|---|
| H          | -8.76240100 | 2.71129100  | - |
| 0.42997300 |             |             |   |
| C          | -1.80943400 | -4.61837700 | - |
| 0.66521900 |             |             |   |
| C          | -1.66753000 | -5.54393000 | - |
| 1.71084400 |             |             |   |
| C          | -2.39162700 | -5.05133900 |   |
| 0.53764200 |             |             |   |
| C          | -2.08444200 | -6.86656500 | - |
| 1.55436400 |             |             |   |
| H          | -1.22940700 | -5.21548400 | - |
| 2.64895900 |             |             |   |
| C          | -2.80918400 | -6.37347800 |   |
| 0.69542700 |             |             |   |
| H          | -2.51430500 | -4.33642700 |   |
| 1.34615600 |             |             |   |
| C          | -2.65458900 | -7.28651200 | - |
| 0.35015200 |             |             |   |
| H          | -1.96931600 | -7.56803600 | - |
| 2.37650500 |             |             |   |
| H          | -3.25289400 | -6.69033200 |   |
| 1.63569600 |             |             |   |
| H          | -2.97862400 | -8.31661200 | - |
| 0.22884000 |             |             |   |
| N          | 2.03871200  | 0.76017500  |   |
| 1.68010100 |             |             |   |
| N          | 3.03487000  | 1.53010400  |   |
| 1.83850900 |             |             |   |
| N          | 4.15483700  | 1.42410400  |   |
| 2.17914400 |             |             |   |
| C          | 0.75592200  | 1.16336700  |   |
| 2.04090000 |             |             |   |
| C          | 0.51288600  | 2.14104500  |   |
| 3.02382200 |             |             |   |
| C          | -1.47344200 | 0.59810400  |   |
| 1.96544200 |             |             |   |
| C          | -0.78751200 | 2.32764600  |   |
| 3.47014700 |             |             |   |
| H          | 1.34090400  | 2.71451300  |   |
| 3.42756200 |             |             |   |
| C          | -1.80292800 | 1.51475000  |   |
| 2.95752900 |             |             |   |
| H          | -2.22944100 | -0.01983400 |   |
| 1.49776800 |             |             |   |

|            |             |             |
|------------|-------------|-------------|
| H          | -1.00314800 | 3.07983200  |
| 4.22389500 |             |             |
| H          | -2.82905900 | 1.60255800  |
| 3.29879100 |             |             |
| N          | -0.23203900 | 0.44301200  |
| 1.47736700 |             |             |
| C          | 3.03217900  | -0.99260600 |
| 2.91567800 |             |             |
| C          | 4.16606800  | -0.48679000 |
| 2.93889600 |             |             |
| C          | 1.82352600  | -1.73635300 |
| 3.08624700 |             |             |
| C          | 1.48132800  | -2.77050800 |
| 2.19908400 |             |             |
| C          | 0.94954700  | -1.41202600 |
| 4.14328500 |             |             |
| C          | 0.29330600  | -3.47458300 |
| 2.37608300 |             |             |
| H          | 2.13662100  | -3.00356400 |
| 1.36826400 |             |             |
| C          | -0.24092200 | -2.11470900 |
| 4.30554500 |             |             |
| H          | 1.20827800  | -0.60138000 |
| 4.81739900 |             |             |
| C          | -0.57102400 | -3.14869400 |
| 3.42385300 |             |             |
| H          | 0.03611700  | -4.26866500 |
| 1.68371000 |             |             |
| H          | -0.91212600 | -1.85460800 |
| 5.11944500 |             |             |
| H          | -1.49912300 | -3.69917600 |
| 3.55383100 |             |             |
| H          | 5.19731800  | -0.52752800 |
| 3.22299900 |             |             |

**<sup>3</sup>TS7**

|            |            |             |   |
|------------|------------|-------------|---|
| Fe         | 0.31836300 | 0.03991300  | - |
| 0.93573700 |            |             |   |
| N          | 1.81182600 | 1.38320400  | - |
| 0.84517100 |            |             |   |
| C          | 0.14577500 | -3.39826000 | - |
| 0.89332300 |            |             |   |
| C          | 3.76798400 | -0.13602800 | - |
| 0.77935700 |            |             |   |



|            |             |             |   |
|------------|-------------|-------------|---|
| C          | 3.65682700  | -2.63956100 | - |
| 0.70095300 |             |             |   |
| C          | 2.64402900  | -3.54570600 | - |
| 0.67899400 |             |             |   |
| C          | 3.04894800  | -1.33516200 | - |
| 0.80917200 |             |             |   |
| C          | 1.41214900  | -2.80576100 | - |
| 0.82202200 |             |             |   |
| H          | 2.71718600  | -4.61903300 | - |
| 0.58619700 |             |             |   |
| H          | 4.71819200  | -2.82779500 | - |
| 0.63665600 |             |             |   |
| N          | -1.01103500 | 1.53168100  | - |
| 1.15650700 |             |             |   |
| N          | 1.67651700  | -1.45496900 | - |
| 0.89230700 |             |             |   |
| N          | -1.14991400 | -1.30517700 | - |
| 1.16377700 |             |             |   |
| C          | 0.48514300  | 3.47435100  | - |
| 0.82247200 |             |             |   |
| C          | -3.08599300 | 0.21160300  | - |
| 1.43909900 |             |             |   |
| C          | -3.22627900 | -2.28822600 | - |
| 1.45734200 |             |             |   |
| C          | 3.90110500  | 2.36471100  | - |
| 0.65795500 |             |             |   |
| C          | -2.99229600 | 2.71369400  | - |
| 1.34844900 |             |             |   |
| C          | -2.32739400 | -3.29316800 | - |
| 1.29217300 |             |             |   |
| C          | 2.98314700  | 3.36786100  | - |
| 0.63731900 |             |             |   |
| C          | -1.99881700 | 3.62324900  | - |
| 1.15711300 |             |             |   |
| C          | -2.49169000 | -1.04995100 | - |
| 1.35828700 |             |             |   |
| C          | 3.16851400  | 1.12848200  | - |
| 0.78895500 |             |             |   |
| C          | -2.37284800 | 1.41037600  | - |
| 1.34080100 |             |             |   |
| C          | -1.03519600 | -2.67574100 | - |
| 1.09966800 |             |             |   |
| C          | 1.68226300  | 2.75318000  | - |
| 0.75563000 |             |             |   |

|            |             |             |   |
|------------|-------------|-------------|---|
| C          | -0.76398500 | 2.88303800  | - |
| 1.04500000 |             |             |   |
| H          | -2.51016000 | -4.35727500 | - |
| 1.30922200 |             |             |   |
| H          | 3.16244500  | 4.43037300  | - |
| 0.56261300 |             |             |   |
| H          | -2.08890300 | 4.69734400  | - |
| 1.08834000 |             |             |   |
| H          | -4.28877800 | -2.36703300 | - |
| 1.63274800 |             |             |   |
| H          | 4.97586200  | 2.44515900  | - |
| 0.58903900 |             |             |   |
| H          | -4.04990100 | 2.89790600  | - |
| 1.46665200 |             |             |   |
| C          | -4.57198500 | 0.28604500  | - |
| 1.58553500 |             |             |   |
| C          | -5.15923100 | 0.74219100  | - |
| 2.77454900 |             |             |   |
| C          | -5.40291400 | -0.09295000 | - |
| 0.52012000 |             |             |   |
| C          | -6.54780000 | 0.81734600  | - |
| 2.89723900 |             |             |   |
| H          | -4.51879600 | 1.03593800  | - |
| 3.60173400 |             |             |   |
| C          | -6.79089300 | -0.01803600 | - |
| 0.64348600 |             |             |   |
| H          | -4.94803600 | -0.43959300 |   |
| 0.40315500 |             |             |   |
| C          | -7.36737900 | 0.43711500  | - |
| 1.83186600 |             |             |   |
| H          | -6.98889600 | 1.16914700  | - |
| 3.82620900 |             |             |   |
| H          | -7.42237600 | -0.31176000 |   |
| 0.19112400 |             |             |   |
| H          | -8.44840600 | 0.49531200  | - |
| 1.92742200 |             |             |   |
| C          | 0.04042100  | -4.88132300 | - |
| 0.74302900 |             |             |   |
| C          | -0.62184500 | -5.43078500 |   |
| 0.36635000 |             |             |   |
| C          | 0.58757400  | -5.75197200 | - |
| 1.69788600 |             |             |   |
| C          | -0.72765000 | -6.81338000 |   |
| 0.52089700 |             |             |   |

|            |             |             |   |
|------------|-------------|-------------|---|
| H          | -1.06132100 | -4.76251900 |   |
| 1.10106100 |             |             |   |
| C          | 0.48363100  | -7.13520700 | - |
| 1.54341700 |             |             |   |
| H          | 1.09222600  | -5.33403100 | - |
| 2.56437800 |             |             |   |
| C          | -0.17286700 | -7.67032000 | - |
| 0.43262800 |             |             |   |
| H          | -1.24351500 | -7.22081600 |   |
| 1.38650600 |             |             |   |
| H          | 0.90986200  | -7.79459000 | - |
| 2.29495500 |             |             |   |
| H          | -0.25522300 | -8.74733000 | - |
| 0.31326800 |             |             |   |
| C          | 5.25836400  | -0.20369600 | - |
| 0.67568100 |             |             |   |
| C          | 5.87204200  | -0.66161500 |   |
| 0.50022000 |             |             |   |
| C          | 6.07108500  | 0.19990400  | - |
| 1.74534600 |             |             |   |
| C          | 7.26241400  | -0.71753800 |   |
| 0.60430600 |             |             |   |
| H          | 5.24569600  | -0.97763600 |   |
| 1.32992300 |             |             |   |
| C          | 7.46212600  | 0.14658300  | - |
| 1.64219300 |             |             |   |
| H          | 5.60221500  | 0.55626700  | - |
| 2.65832200 |             |             |   |
| C          | 8.06189300  | -0.31252600 | - |
| 0.46724300 |             |             |   |
| H          | 7.72123600  | -1.07330400 |   |
| 1.52320200 |             |             |   |
| H          | 8.07708800  | 0.46006500  | - |
| 2.48168000 |             |             |   |
| H          | 9.14481600  | -0.35471200 | - |
| 0.38718600 |             |             |   |
| C          | 0.54739000  | 4.95576500  | - |
| 0.63700200 |             |             |   |
| C          | 0.25132500  | 5.83733800  | - |
| 1.68756600 |             |             |   |
| C          | 0.90571300  | 5.49242700  |   |
| 0.61015500 |             |             |   |
| C          | 0.30318300  | 7.21866000  | - |
| 1.49396100 |             |             |   |

|            |             |             |   |
|------------|-------------|-------------|---|
| H          | -0.01891600 | 5.42974300  | - |
| 2.65760300 |             |             |   |
| C          | 0.95856700  | 6.87328700  |   |
| 0.80465900 |             |             |   |
| H          | 1.14171900  | 4.81232400  |   |
| 1.42336700 |             |             |   |
| C          | 0.65536700  | 7.74099800  | - |
| 0.24711900 |             |             |   |
| H          | 0.07342500  | 7.88712500  | - |
| 2.31953300 |             |             |   |
| H          | 1.23354500  | 7.27083800  |   |
| 1.77817200 |             |             |   |
| H          | 0.69522200  | 8.81650400  | - |
| 0.09704900 |             |             |   |
| N          | -1.60875600 | -1.41420400 |   |
| 1.83290300 |             |             |   |
| N          | -2.31413800 | -2.45733500 |   |
| 1.97212500 |             |             |   |
| N          | -3.41931900 | -2.71518000 |   |
| 2.27426100 |             |             |   |
| C          | -0.24133800 | -1.42121000 |   |
| 2.10719400 |             |             |   |
| C          | 0.40690600  | -2.44002400 |   |
| 2.83112100 |             |             |   |
| C          | 1.66508300  | -0.14216800 |   |
| 2.05460100 |             |             |   |
| C          | 1.74477000  | -2.26426500 |   |
| 3.15698300 |             |             |   |
| H          | -0.13619100 | -3.33293000 |   |
| 3.12233000 |             |             |   |
| C          | 2.38734300  | -1.07745800 |   |
| 2.78993000 |             |             |   |
| H          | 2.12873700  | 0.77272600  |   |
| 1.70110900 |             |             |   |
| H          | 2.27704100  | -3.03763300 |   |
| 3.70388000 |             |             |   |
| H          | 3.42407700  | -0.88951400 |   |
| 3.04907600 |             |             |   |
| N          | 0.38871300  | -0.31316800 |   |
| 1.68511700 |             |             |   |
| C          | -3.16964800 | -0.02299100 |   |
| 2.92189100 |             |             |   |
| C          | -4.07939100 | -0.86649500 |   |
| 2.94987100 |             |             |   |

|            |             |             |
|------------|-------------|-------------|
| C          | -2.28551900 | 1.09167600  |
| 3.07343900 |             |             |
| C          | -2.28024600 | 2.14372300  |
| 2.14204200 |             |             |
| C          | -1.40102500 | 1.13139700  |
| 4.16884300 |             |             |
| C          | -1.41411000 | 3.22034700  |
| 2.31432600 |             |             |
| H          | -2.94114500 | 2.10504300  |
| 1.28402100 |             |             |
| C          | -0.53571900 | 2.20938200  |
| 4.33004900 |             |             |
| H          | -1.39610300 | 0.30853800  |
| 4.87728700 |             |             |
| C          | -0.54131700 | 3.25689000  |
| 3.40441600 |             |             |
| H          | -1.41202300 | 4.02540400  |
| 1.58743800 |             |             |
| H          | 0.14435600  | 2.23150900  |
| 5.17726500 |             |             |
| H          | 0.13066800  | 4.10119200  |
| 3.53393500 |             |             |
| H          | -5.07585400 | -1.16324200 |
| 3.20257800 |             |             |

**<sup>5</sup>TS7**

|            |             |            |   |
|------------|-------------|------------|---|
| N          | -1.63107500 | 1.15105600 | - |
| 1.13011800 |             |            |   |
| C          | 3.51808800  | 0.98746600 | - |
| 0.89444200 |             |            |   |
| C          | -0.73174800 | 3.44669600 | - |
| 0.96829400 |             |            |   |
| C          | 1.70116200  | 4.12033700 | - |
| 0.80536600 |             |            |   |
| C          | 2.88485500  | 3.43860100 | - |
| 0.80417900 |             |            |   |
| C          | 0.64597700  | 3.14193300 | - |
| 0.93461800 |             |            |   |
| C          | 2.57010800  | 2.03410500 | - |
| 0.93895600 |             |            |   |
| H          | 3.87919700  | 3.85093500 | - |
| 0.71287100 |             |            |   |
| H          | 1.55544600  | 5.18847200 | - |
| 0.72951500 |             |            |   |

|            |             |             |   |
|------------|-------------|-------------|---|
| N          | -0.85738100 | -1.66042300 | - |
| 1.16256300 |             |             |   |
| N          | 1.20345400  | 1.88633300  | - |
| 1.02120800 |             |             |   |
| N          | 1.96936200  | -0.94061100 | - |
| 0.92502000 |             |             |   |
| C          | -3.17697800 | -0.77105300 | - |
| 1.23707800 |             |             |   |
| C          | 1.06293200  | -3.23541400 | - |
| 1.02891000 |             |             |   |
| C          | 3.53048400  | -2.63075500 | - |
| 1.01562400 |             |             |   |
| C          | -3.18590000 | 2.84882100  | - |
| 1.20208200 |             |             |   |
| C          | -1.37326600 | -3.90310600 | - |
| 1.12035500 |             |             |   |
| C          | 4.21351900  | -1.45400000 | - |
| 0.98287600 |             |             |   |
| C          | -3.86870000 | 1.67307600  | - |
| 1.28620400 |             |             |   |
| C          | -2.55017600 | -3.21899000 | - |
| 1.17825500 |             |             |   |
| C          | 2.11648100  | -2.30006000 | - |
| 0.97855200 |             |             |   |
| C          | -1.77596300 | 2.51516000  | - |
| 1.10862200 |             |             |   |
| C          | -0.30927100 | -2.92272600 | - |
| 1.11625100 |             |             |   |
| C          | 3.22446400  | -0.39089300 | - |
| 0.92356000 |             |             |   |
| C          | -2.88377200 | 0.60637600  | - |
| 1.24421400 |             |             |   |
| C          | -2.22385500 | -1.80966800 | - |
| 1.19196200 |             |             |   |
| H          | 5.28367100  | -1.31004800 | - |
| 1.02231100 |             |             |   |
| H          | -4.93734000 | 1.53500500  | - |
| 1.36573000 |             |             |   |
| H          | -3.54917000 | -3.62885400 | - |
| 1.20585700 |             |             |   |
| H          | 3.93614500  | -3.62974800 | - |
| 1.08680200 |             |             |   |
| H          | -3.59263200 | 3.85012300  | - |
| 1.20412400 |             |             |   |

|            |             |             |   |
|------------|-------------|-------------|---|
| H          | -1.23654800 | -4.97344300 | - |
| 1.07535300 |             |             |   |
| C          | -4.62089100 | -1.16311000 | - |
| 1.22230800 |             |             |   |
| C          | -5.18155700 | -1.73388500 | - |
| 0.06828900 |             |             |   |
| C          | -5.44206600 | -0.95780100 | - |
| 2.34067800 |             |             |   |
| C          | -6.53115600 | -2.08754100 | - |
| 0.03438200 |             |             |   |
| H          | -4.54730300 | -1.89730100 |   |
| 0.79900000 |             |             |   |
| C          | -6.79226000 | -1.31077400 | - |
| 2.30637600 |             |             |   |
| H          | -5.01223200 | -0.52026700 | - |
| 3.23749500 |             |             |   |
| C          | -7.34092700 | -1.87623100 | - |
| 1.15290300 |             |             |   |
| H          | -6.95109000 | -2.52488800 |   |
| 0.86785800 |             |             |   |
| H          | -7.41434100 | -1.14798100 | - |
| 3.18267100 |             |             |   |
| H          | -8.39201100 | -2.15116300 | - |
| 1.12647100 |             |             |   |
| C          | -1.11622500 | 4.88381000  | - |
| 0.80273500 |             |             |   |
| C          | -1.59751500 | 5.64043400  | - |
| 1.88046200 |             |             |   |
| C          | -1.00952400 | 5.49475700  |   |
| 0.45634100 |             |             |   |
| C          | -1.96712300 | 6.97525000  | - |
| 1.70331900 |             |             |   |
| H          | -1.67970900 | 5.17329000  | - |
| 2.85791700 |             |             |   |
| C          | -1.37618400 | 6.82946900  |   |
| 0.63430800 |             |             |   |
| H          | -0.63796700 | 4.90904700  |   |
| 1.29305900 |             |             |   |
| C          | -1.85736500 | 7.57341300  | - |
| 0.44588100 |             |             |   |
| H          | -2.33691700 | 7.54891200  | - |
| 2.54916500 |             |             |   |
| H          | -1.28990300 | 7.28731200  |   |
| 1.61642900 |             |             |   |

|            |             |             |   |
|------------|-------------|-------------|---|
| H          | -2.14448100 | 8.61249300  | - |
| 0.30865400 |             |             |   |
| C          | 4.95623300  | 1.37284000  | - |
| 0.76656400 |             |             |   |
| C          | 5.61533900  | 2.07797200  | - |
| 1.78522000 |             |             |   |
| C          | 5.67518400  | 1.03526700  |   |
| 0.39152900 |             |             |   |
| C          | 6.95724200  | 2.43686500  | - |
| 1.64985800 |             |             |   |
| H          | 5.06594700  | 2.33899700  | - |
| 2.68534000 |             |             |   |
| C          | 7.01687600  | 1.39330600  |   |
| 0.52753900 |             |             |   |
| H          | 5.16669600  | 0.49192500  |   |
| 1.18332500 |             |             |   |
| C          | 7.66227800  | 2.09577400  | - |
| 0.49310700 |             |             |   |
| H          | 7.45358600  | 2.97824500  | - |
| 2.45100200 |             |             |   |
| H          | 7.55786500  | 1.12650500  |   |
| 1.43189800 |             |             |   |
| H          | 8.70745100  | 2.37445600  | - |
| 0.38840800 |             |             |   |
| C          | 1.43778500  | -4.68116000 | - |
| 0.96683500 |             |             |   |
| C          | 2.01665100  | -5.20943500 |   |
| 0.19758300 |             |             |   |
| C          | 1.22332000  | -5.53588600 | - |
| 2.05872800 |             |             |   |
| C          | 2.37021100  | -6.55711300 |   |
| 0.26998100 |             |             |   |
| H          | 2.17910400  | -4.55243300 |   |
| 1.04730200 |             |             |   |
| C          | 1.57694800  | -6.88408000 | - |
| 1.98781100 |             |             |   |
| H          | 0.77881700  | -5.13222500 | - |
| 2.96406100 |             |             |   |
| C          | 2.15136800  | -7.39882800 | - |
| 0.82314300 |             |             |   |
| H          | 2.81182700  | -6.95092500 |   |
| 1.18173700 |             |             |   |
| H          | 1.40772500  | -7.53133100 | - |
| 2.84439100 |             |             |   |



|            |             |             |   |
|------------|-------------|-------------|---|
| H          | 2.42630800  | -8.44876800 | - |
| 0.76776900 |             |             |   |
| N          | -0.29423500 | -1.85020600 |   |
| 1.87253700 |             |             |   |
| N          | -0.30016100 | -3.09541200 |   |
| 2.12947900 |             |             |   |
| N          | -1.10902100 | -3.88458800 |   |
| 2.45188500 |             |             |   |
| C          | 0.78186100  | -1.03713200 |   |
| 2.19893000 |             |             |   |
| C          | 1.75416400  | -1.35642700 |   |
| 3.16226500 |             |             |   |
| C          | 1.59605000  | 1.10640200  |   |
| 1.98041000 |             |             |   |
| C          | 2.67562400  | -0.37938800 |   |
| 3.51816400 |             |             |   |
| H          | 1.76210500  | -2.34232200 |   |
| 3.61531300 |             |             |   |
| C          | 2.58101200  | 0.89038300  |   |
| 2.94134100 |             |             |   |
| H          | 1.49894800  | 2.06436500  |   |
| 1.48378600 |             |             |   |
| H          | 3.44425200  | -0.59866100 |   |
| 4.25424900 |             |             |   |
| H          | 3.26375300  | 1.68951800  |   |
| 3.20929700 |             |             |   |
| N          | 0.73599600  | 0.15948400  |   |
| 1.58069100 |             |             |   |
| C          | -2.39640900 | -1.47540100 |   |
| 2.89189100 |             |             |   |
| C          | -2.69605400 | -2.68056900 |   |
| 2.93829100 |             |             |   |
| C          | -2.22714200 | -0.06157700 |   |
| 3.03144400 |             |             |   |
| C          | -2.80181600 | 0.83714500  |   |
| 2.11693000 |             |             |   |
| C          | -1.44160100 | 0.43843700  |   |
| 4.09037500 |             |             |   |
| C          | -2.58338000 | 2.20649400  |   |
| 2.25302800 |             |             |   |
| H          | -3.40129200 | 0.45907400  |   |
| 1.29847300 |             |             |   |
| C          | -1.22799900 | 1.80733600  |   |
| 4.21804700 |             |             |   |

|                |             |             |   |
|----------------|-------------|-------------|---|
| H              | -0.98979800 | -0.25756100 |   |
| 4.79047100     |             |             |   |
| C              | -1.79367000 | 2.69449900  |   |
| 3.29633900     |             |             |   |
| H              | -3.01964400 | 2.88657300  |   |
| 1.52945600     |             |             |   |
| H              | -0.61459000 | 2.18197000  |   |
| 5.03285600     |             |             |   |
| H              | -1.62358200 | 3.76364300  |   |
| 3.39271800     |             |             |   |
| H              | -3.39057900 | -3.45611800 |   |
| 3.18735800     |             |             |   |
| Fe             | 0.15189900  | 0.11181600  | - |
| 0.76972600     |             |             |   |
| <b>CSSINT8</b> |             |             |   |
| Fe             | -0.23750900 | 0.06902300  | - |
| 0.42277900     |             |             |   |
| N              | -2.24343500 | 0.27384600  | - |
| 0.36199400     |             |             |   |
| C              | 1.91657900  | -2.61197400 | - |
| 0.68712600     |             |             |   |
| C              | -2.92529200 | -2.10660700 | - |
| 0.37720900     |             |             |   |
| C              | -1.37331200 | -4.06382900 | - |
| 0.62083000     |             |             |   |
| C              | -0.02276700 | -4.20555500 | - |
| 0.68561300     |             |             |   |
| C              | -1.64228800 | -2.64958100 | - |
| 0.50903500     |             |             |   |
| C              | 0.54266600  | -2.87762300 | - |
| 0.62596900     |             |             |   |
| H              | 0.54601500  | -5.11784000 | - |
| 0.79113200     |             |             |   |
| H              | -2.12637000 | -4.83728100 | - |
| 0.65709700     |             |             |   |
| N              | -0.03960000 | 2.06199800  | - |
| 0.52781800     |             |             |   |
| N              | -0.46079400 | -1.93517500 | - |
| 0.53478500     |             |             |   |
| N              | 1.74261200  | -0.14344500 | - |
| 0.74866600     |             |             |   |
| C              | -2.40385300 | 2.74068400  | - |
| 0.25313600     |             |             |   |

|            |             |             |   |
|------------|-------------|-------------|---|
| C          | 2.41694100  | 2.23555900  | - |
| 0.75305400 |             |             |   |
| C          | 4.01523700  | 0.30296000  | - |
| 0.80814300 |             |             |   |
| C          | -4.49922100 | -0.17646200 | - |
| 0.07544400 |             |             |   |
| C          | 0.85078000  | 4.19333400  | - |
| 0.70717000 |             |             |   |
| C          | 3.87622600  | -1.04811700 | - |
| 0.78132900 |             |             |   |
| C          | -4.35202200 | 1.17344800  | - |
| 0.02265200 |             |             |   |
| C          | -0.49205200 | 4.33482200  | - |
| 0.56605800 |             |             |   |
| C          | 2.68407600  | 0.86365400  | - |
| 0.79011600 |             |             |   |
| C          | -3.18501500 | -0.73360400 | - |
| 0.29372700 |             |             |   |
| C          | 1.12969100  | 2.77523000  | - |
| 0.66502600 |             |             |   |
| C          | 2.45831300  | -1.32420100 | - |
| 0.75171700 |             |             |   |
| C          | -2.94799600 | 1.45187900  | - |
| 0.21654200 |             |             |   |
| C          | -1.04169300 | 3.00356200  | - |
| 0.43518000 |             |             |   |
| H          | 4.65601900  | -1.79511100 | - |
| 0.77002900 |             |             |   |
| H          | -5.11648700 | 1.91911400  |   |
| 0.13835200 |             |             |   |
| H          | -1.06946800 | 5.24752500  | - |
| 0.56621300 |             |             |   |
| H          | 4.93094800  | 0.87520900  | - |
| 0.82163400 |             |             |   |
| H          | -5.40627100 | -0.75213600 |   |
| 0.03571000 |             |             |   |
| H          | 1.59097500  | 4.96757200  | - |
| 0.84610900 |             |             |   |
| C          | 1.74569300  | -1.38402600 |   |
| 2.59048000 |             |             |   |
| C          | 1.25721900  | -0.12882800 |   |
| 2.21631600 |             |             |   |
| C          | 3.18372200  | 0.92944400  |   |
| 2.78494200 |             |             |   |

|            |             |             |   |
|------------|-------------|-------------|---|
| C          | 3.77860200  | -0.26225800 |   |
| 3.20053800 |             |             |   |
| C          | 3.03931100  | -1.44200100 |   |
| 3.10123700 |             |             |   |
| H          | 1.14916000  | -2.27731200 |   |
| 2.43796400 |             |             |   |
| H          | 3.73220700  | 1.86771800  |   |
| 2.82278700 |             |             |   |
| H          | 4.79679300  | -0.26489700 |   |
| 3.57578400 |             |             |   |
| H          | 3.47035100  | -2.39671300 |   |
| 3.38802900 |             |             |   |
| N          | -0.04671200 | -0.00772000 |   |
| 1.59836900 |             |             |   |
| N          | 1.93579500  | 1.00562900  |   |
| 2.30524900 |             |             |   |
| N          | -1.86729500 | -1.17900900 |   |
| 2.59954200 |             |             |   |
| N          | -0.96452800 | -0.65354400 |   |
| 2.16041000 |             |             |   |
| C          | -4.08402200 | -3.04779200 | - |
| 0.29893700 |             |             |   |
| C          | -5.02500600 | -3.11509300 | - |
| 1.33726000 |             |             |   |
| C          | -4.25280800 | -3.87870800 |   |
| 0.81907300 |             |             |   |
| C          | -6.10705900 | -3.99339500 | - |
| 1.26120000 |             |             |   |
| H          | -4.89942300 | -2.47326900 | - |
| 2.20478700 |             |             |   |
| C          | -5.33437500 | -4.75719200 |   |
| 0.89615200 |             |             |   |
| H          | -3.52991900 | -3.82468700 |   |
| 1.62818700 |             |             |   |
| C          | -6.26452400 | -4.81741200 | - |
| 0.14432800 |             |             |   |
| H          | -6.82490700 | -4.03624600 | - |
| 2.07614700 |             |             |   |
| H          | -5.45299400 | -5.39111900 |   |
| 1.77105300 |             |             |   |
| H          | -7.10699200 | -5.50133800 | - |
| 0.08480500 |             |             |   |
| C          | -3.33033800 | 3.90450600  | - |
| 0.10441200 |             |             |   |

|            |             |             |   |
|------------|-------------|-------------|---|
| C          | -3.25439000 | 4.73665000  |   |
| 1.02308300 |             |             |   |
| C          | -4.28923200 | 4.19086600  | - |
| 1.08827800 |             |             |   |
| C          | -4.11593700 | 5.82532000  |   |
| 1.16472400 |             |             |   |
| H          | -2.51278000 | 4.52112700  |   |
| 1.78717400 |             |             |   |
| C          | -5.15126100 | 5.27934500  | - |
| 0.94779800 |             |             |   |
| H          | -4.35091000 | 3.55264300  | - |
| 1.96524800 |             |             |   |
| C          | -5.06746500 | 6.09977900  |   |
| 0.17961400 |             |             |   |
| H          | -4.04578500 | 6.45708800  |   |
| 2.04637300 |             |             |   |
| H          | -5.88521700 | 5.48888400  | - |
| 1.72157100 |             |             |   |
| H          | -5.73850700 | 6.94755500  |   |
| 0.28929700 |             |             |   |
| C          | 3.57455900  | 3.17914600  | - |
| 0.73719800 |             |             |   |
| C          | 4.42860500  | 3.31199800  | - |
| 1.84178100 |             |             |   |
| C          | 3.83171500  | 3.94721500  |   |
| 0.41019000 |             |             |   |
| C          | 5.51527000  | 4.18743600  | - |
| 1.79988800 |             |             |   |
| H          | 4.23249000  | 2.72369600  | - |
| 2.73379900 |             |             |   |
| C          | 4.91754500  | 4.82241900  |   |
| 0.45280900 |             |             |   |
| H          | 3.16523600  | 3.84989400  |   |
| 1.26282300 |             |             |   |
| C          | 5.76373200  | 4.94418300  | - |
| 0.65240800 |             |             |   |
| H          | 6.16487500  | 4.28182800  | - |
| 2.66617000 |             |             |   |
| H          | 5.10370700  | 5.40845500  |   |
| 1.34921600 |             |             |   |
| H          | 6.60939000  | 5.62602300  | - |
| 0.62057400 |             |             |   |
| C          | 2.85588900  | -3.77426400 | - |
| 0.67210700 |             |             |   |

|            |            |             |   |
|------------|------------|-------------|---|
| C          | 2.96126500 | -4.58708100 |   |
| 0.46747000 |            |             |   |
| C          | 3.65249000 | -4.07772100 | - |
| 1.78674200 |            |             |   |
| C          | 3.83993300 | -5.67065600 |   |
| 0.49526200 |            |             |   |
| H          | 2.34283100 | -4.36275800 |   |
| 1.33233200 |            |             |   |
| C          | 4.53278400 | -5.16045800 | - |
| 1.76100700 |            |             |   |
| H          | 3.57356700 | -3.45628500 | - |
| 2.67417700 |            |             |   |
| C          | 4.63005100 | -5.96002000 | - |
| 0.61973000 |            |             |   |
| H          | 3.90882100 | -6.28767300 |   |
| 1.38752600 |            |             |   |
| H          | 5.13905400 | -5.38255500 | - |
| 2.63526200 |            |             |   |
| H          | 5.31472500 | -6.80365800 | - |
| 0.60018200 |            |             |   |

**ossINT8**

|            |             |             |   |
|------------|-------------|-------------|---|
| Fe         | -0.26176200 | 0.10447200  | - |
| 0.48295600 |             |             |   |
| N          | -2.27223900 | 0.13346200  | - |
| 0.36673800 |             |             |   |
| C          | 2.12068000  | -2.37982300 | - |
| 0.66626300 |             |             |   |
| C          | -2.75642600 | -2.29331800 | - |
| 0.49405200 |             |             |   |
| C          | -1.03539500 | -4.10576300 | - |
| 0.71650700 |             |             |   |
| C          | 0.32476900  | -4.13097900 | - |
| 0.72522000 |             |             |   |
| C          | -1.42896100 | -2.72343300 | - |
| 0.59868500 |             |             |   |
| C          | 0.77317600  | -2.76198700 | - |
| 0.63499300 |             |             |   |
| H          | 0.97258800  | -4.99083500 | - |
| 0.81377600 |             |             |   |
| H          | -1.71676100 | -4.94063000 | - |
| 0.78841700 |             |             |   |
| N          | -0.22738300 | 2.10753900  | - |
| 0.49644200 |             |             |   |

|            |             |             |   |
|------------|-------------|-------------|---|
| N          | -0.31107900 | -1.91159900 | - |
| 0.56937600 |             |             |   |
| N          | 1.73243500  | 0.06331200  | - |
| 0.76466300 |             |             |   |
| C          | -2.63424500 | 2.57220100  | - |
| 0.14596300 |             |             |   |
| C          | 2.19774600  | 2.49356200  | - |
| 0.79206500 |             |             |   |
| C          | 3.95353500  | 0.70966800  | - |
| 0.85130400 |             |             |   |
| C          | -4.48040100 | -0.51542000 | - |
| 0.10689400 |             |             |   |
| C          | 0.47717500  | 4.30860500  | - |
| 0.62814700 |             |             |   |
| C          | 3.93506400  | -0.64757600 | - |
| 0.78094600 |             |             |   |
| C          | -4.44266900 | 0.83758300  |   |
| 0.02110500 |             |             |   |
| C          | -0.86784500 | 4.33061900  | - |
| 0.43534200 |             |             |   |
| C          | 2.57976600  | 1.14956500  | - |
| 0.83097500 |             |             |   |
| C          | -3.12711000 | -0.95163700 | - |
| 0.35156800 |             |             |   |
| C          | 0.87466700  | 2.92097500  | - |
| 0.64884000 |             |             |   |
| C          | 2.54822300  | -1.04908200 | - |
| 0.74087500 |             |             |   |
| C          | -3.06841700 | 1.24115500  | - |
| 0.16226900 |             |             |   |
| C          | -1.30205100 | 2.95561700  | - |
| 0.34160000 |             |             |   |
| H          | 4.77838700  | -1.32103900 | - |
| 0.74618900 |             |             |   |
| H          | -5.26425000 | 1.50788800  |   |
| 0.22623400 |             |             |   |
| H          | -1.51762900 | 5.19135800  | - |
| 0.37680700 |             |             |   |
| H          | 4.81380700  | 1.36163700  | - |
| 0.88527000 |             |             |   |
| H          | -5.33655400 | -1.16850200 | - |
| 0.02387600 |             |             |   |
| H          | 1.14571500  | 5.14718800  | - |
| 0.75664000 |             |             |   |

|            |             |             |   |
|------------|-------------|-------------|---|
| C          | 1.81875800  | -1.48637000 |   |
| 2.79360200 |             |             |   |
| C          | 1.30544200  | -0.25359100 |   |
| 2.36792700 |             |             |   |
| C          | 3.32264600  | 0.78157000  |   |
| 2.57587500 |             |             |   |
| C          | 3.94490700  | -0.38817100 |   |
| 3.01355600 |             |             |   |
| C          | 3.16894000  | -1.54276000 |   |
| 3.12532500 |             |             |   |
| H          | 1.19151500  | -2.37137600 |   |
| 2.83047800 |             |             |   |
| H          | 3.89004700  | 1.70175400  |   |
| 2.45442800 |             |             |   |
| H          | 5.00487300  | -0.39467100 |   |
| 3.24508700 |             |             |   |
| H          | 3.61171800  | -2.48213100 |   |
| 3.44332200 |             |             |   |
| N          | -0.04782400 | -0.09838300 |   |
| 1.92751800 |             |             |   |
| N          | 2.02502900  | 0.85943100  |   |
| 2.26352000 |             |             |   |
| N          | -1.70900500 | -1.67223100 |   |
| 2.56986400 |             |             |   |
| N          | -0.86427100 | -0.96057400 |   |
| 2.30671100 |             |             |   |
| C          | -3.83684800 | -3.32585000 | - |
| 0.47597100 |             |             |   |
| C          | -4.75181400 | -3.42404900 | - |
| 1.53478700 |             |             |   |
| C          | -3.96132400 | -4.20825800 |   |
| 0.60817400 |             |             |   |
| C          | -5.76461000 | -4.38422400 | - |
| 1.51303800 |             |             |   |
| H          | -4.66101100 | -2.74151100 | - |
| 2.37520400 |             |             |   |
| C          | -4.97363400 | -5.16851600 |   |
| 0.63047900 |             |             |   |
| H          | -3.26059900 | -4.12774400 |   |
| 1.43426600 |             |             |   |
| C          | -5.87778200 | -5.25976400 | - |
| 0.43057400 |             |             |   |
| H          | -6.46299100 | -4.45013700 | - |
| 2.34321100 |             |             |   |



|            |             |             |   |
|------------|-------------|-------------|---|
| H          | -5.05949700 | -5.84178700 |   |
| 1.47943300 |             |             |   |
| H          | -6.66635100 | -6.00737300 | - |
| 0.41327200 |             |             |   |
| C          | -3.64912200 | 3.64763100  |   |
| 0.07246500 |             |             |   |
| C          | -3.61516400 | 4.43183300  |   |
| 1.23596300 |             |             |   |
| C          | -4.64925400 | 3.89938400  | - |
| 0.87939100 |             |             |   |
| C          | -4.55779400 | 5.43969700  |   |
| 1.44374100 |             |             |   |
| H          | -2.84252700 | 4.24253700  |   |
| 1.97587200 |             |             |   |
| C          | -5.59259100 | 4.90679900  | - |
| 0.67242000 |             |             |   |
| H          | -4.67834300 | 3.29915700  | - |
| 1.78443400 |             |             |   |
| C          | -5.54985900 | 5.67992000  |   |
| 0.49019200 |             |             |   |
| H          | -4.51902900 | 6.03483200  |   |
| 2.35237900 |             |             |   |
| H          | -6.35776900 | 5.09081200  | - |
| 1.42204400 |             |             |   |
| H          | -6.28408000 | 6.46472100  |   |
| 0.65152300 |             |             |   |
| C          | 3.27514700  | 3.52853100  | - |
| 0.81712900 |             |             |   |
| C          | 4.03684600  | 3.76057600  | - |
| 1.97134200 |             |             |   |
| C          | 3.55382800  | 4.27537000  |   |
| 0.33865300 |             |             |   |
| C          | 5.05364700  | 4.71730600  | - |
| 1.97133800 |             |             |   |
| H          | 3.82505700  | 3.18502800  | - |
| 2.86816900 |             |             |   |
| C          | 4.57014300  | 5.23167800  |   |
| 0.33922800 |             |             |   |
| H          | 2.96333200  | 4.09479900  |   |
| 1.23288500 |             |             |   |
| C          | 5.32323900  | 5.45510100  | - |
| 0.81630200 |             |             |   |
| H          | 5.63263400  | 4.88865300  | - |
| 2.87507200 |             |             |   |

|                         |             |             |   |
|-------------------------|-------------|-------------|---|
| H                       | 4.77554300  | 5.80047200  |   |
| 1.24243800              |             |             |   |
| H                       | 6.11456400  | 6.19998900  | - |
| 0.81684800              |             |             |   |
| C                       | 3.15419600  | -3.45727600 | - |
| 0.61731700              |             |             |   |
| C                       | 3.28479900  | -4.26014700 |   |
| 0.52700000              |             |             |   |
| C                       | 4.01219900  | -3.69367900 | - |
| 1.70243200              |             |             |   |
| C                       | 4.24890700  | -5.26682400 |   |
| 0.58860800              |             |             |   |
| H                       | 2.62014100  | -4.08565000 |   |
| 1.36787900              |             |             |   |
| C                       | 4.97804500  | -4.69933600 | - |
| 1.64235900              |             |             |   |
| H                       | 3.91258800  | -3.08236900 | - |
| 2.59479700              |             |             |   |
| C                       | 5.10050300  | -5.48849200 | - |
| 0.49626800              |             |             |   |
| H                       | 4.33622900  | -5.87703800 |   |
| 1.48397300              |             |             |   |
| H                       | 5.63098900  | -4.87043400 | - |
| 2.49417600              |             |             |   |
| H                       | 5.85177700  | -6.27229700 | - |
| 0.45018300              |             |             |   |
| <b><sup>3</sup>INT8</b> |             |             |   |
| Fe                      | -0.27103600 | 0.11222100  | - |
| 0.52107800              |             |             |   |
| N                       | -2.27637500 | 0.08490400  | - |
| 0.38293700              |             |             |   |
| C                       | 2.18468000  | -2.30528600 | - |
| 0.69279700              |             |             |   |
| C                       | -2.69188600 | -2.35561300 | - |
| 0.48579500              |             |             |   |
| C                       | -0.92247300 | -4.11569900 | - |
| 0.70588700              |             |             |   |
| C                       | 0.43739300  | -4.10265300 | - |
| 0.72802800              |             |             |   |
| C                       | -1.35343700 | -2.74554400 | - |
| 0.59040000              |             |             |   |
| C                       | 0.84891100  | -2.72224200 | - |
| 0.64513300              |             |             |   |

|            |             |             |   |
|------------|-------------|-------------|---|
| H          | 1.10788900  | -4.94438500 | - |
| 0.82043100 |             |             |   |
| H          | -1.58123300 | -4.96918600 | - |
| 0.76776500 |             |             |   |
| N          | -0.28946700 | 2.11303400  | - |
| 0.49413200 |             |             |   |
| N          | -0.25809400 | -1.90113700 | - |
| 0.57027200 |             |             |   |
| N          | 1.72551400  | 0.12720700  | - |
| 0.76311500 |             |             |   |
| C          | -2.71167100 | 2.51305400  | - |
| 0.17103900 |             |             |   |
| C          | 2.12761600  | 2.56980100  | - |
| 0.75859500 |             |             |   |
| C          | 3.92810300  | 0.83590500  | - |
| 0.84855900 |             |             |   |
| C          | -4.46416300 | -0.62676800 | - |
| 0.11252300 |             |             |   |
| C          | 0.35885100  | 4.33368900  | - |
| 0.59118300 |             |             |   |
| C          | 3.94650200  | -0.52217100 | - |
| 0.80066800 |             |             |   |
| C          | -4.46602200 | 0.72802500  | - |
| 0.00117500 |             |             |   |
| C          | -0.98929000 | 4.31777800  | - |
| 0.42131300 |             |             |   |
| C          | 2.54416400  | 1.23773100  | - |
| 0.81519000 |             |             |   |
| C          | -3.09983100 | -1.02494400 | - |
| 0.35441600 |             |             |   |
| C          | 0.79289400  | 2.95833600  | - |
| 0.62211300 |             |             |   |
| C          | 2.57255200  | -0.96264300 | - |
| 0.75809800 |             |             |   |
| C          | -3.10501900 | 1.17010200  | - |
| 0.18605500 |             |             |   |
| C          | -1.38864000 | 2.93182800  | - |
| 0.34779600 |             |             |   |
| H          | 4.80780900  | -1.17283300 | - |
| 0.77778700 |             |             |   |
| H          | -5.30609500 | 1.37644700  | - |
| 0.20160300 |             |             |   |
| H          | -1.66273300 | 5.16011900  | - |
| 0.36333100 |             |             |   |

|            |             |             |   |
|------------|-------------|-------------|---|
| H          | 4.76984100  | 1.51190700  | - |
| 0.87375100 |             |             |   |
| H          | -5.29992900 | -1.30457600 | - |
| 0.02110400 |             |             |   |
| H          | 1.00762600  | 5.19056200  | - |
| 0.69798900 |             |             |   |
| C          | 1.89628000  | -1.50219200 |   |
| 2.78276600 |             |             |   |
| C          | 1.30087000  | -0.27559600 |   |
| 2.45270800 |             |             |   |
| C          | 3.29131200  | 0.83072500  |   |
| 2.53878900 |             |             |   |
| C          | 3.99175200  | -0.32903200 |   |
| 2.87265500 |             |             |   |
| C          | 3.27072600  | -1.51717700 |   |
| 2.99726600 |             |             |   |
| H          | 1.30782700  | -2.41236500 |   |
| 2.84127800 |             |             |   |
| H          | 3.81324500  | 1.77668400  |   |
| 2.41047300 |             |             |   |
| H          | 5.06697700  | -0.30181500 |   |
| 3.01487100 |             |             |   |
| H          | 3.77307900  | -2.44991800 |   |
| 3.23635500 |             |             |   |
| N          | -0.08631000 | -0.14597400 |   |
| 2.15229900 |             |             |   |
| N          | 1.97099700  | 0.86923100  |   |
| 2.33576100 |             |             |   |
| N          | -1.60568800 | -1.91389400 |   |
| 2.60227700 |             |             |   |
| N          | -0.82147700 | -1.11099100 |   |
| 2.41885800 |             |             |   |
| C          | -3.74083200 | -3.41983400 | - |
| 0.45369300 |             |             |   |
| C          | -4.65077500 | -3.56125300 | - |
| 1.51176900 |             |             |   |
| C          | -3.83881800 | -4.28894700 |   |
| 0.64381900 |             |             |   |
| C          | -5.63373200 | -4.55160700 | - |
| 1.47642400 |             |             |   |
| H          | -4.57977500 | -2.88892300 | - |
| 2.36229800 |             |             |   |
| C          | -4.82156000 | -5.27911000 |   |
| 0.67938300 |             |             |   |

|            |             |             |   |
|------------|-------------|-------------|---|
| H          | -3.14207500 | -4.17358300 |   |
| 1.46900600 |             |             |   |
| C          | -5.72117200 | -5.41380700 | - |
| 0.38094700 |             |             |   |
| H          | -6.32880100 | -4.65135700 | - |
| 2.30599100 |             |             |   |
| H          | -4.88800300 | -5.94194400 |   |
| 1.53822900 |             |             |   |
| H          | -6.48652700 | -6.18486200 | - |
| 0.35303900 |             |             |   |
| C          | -3.76018900 | 3.55804100  |   |
| 0.03497700 |             |             |   |
| C          | -3.76621800 | 4.34046000  |   |
| 1.20012800 |             |             |   |
| C          | -4.75448300 | 3.78010700  | - |
| 0.93021300 |             |             |   |
| C          | -4.74205700 | 5.31867500  |   |
| 1.39596000 |             |             |   |
| H          | -2.99910100 | 4.17273200  |   |
| 1.95087500 |             |             |   |
| C          | -5.73091200 | 4.75793300  | - |
| 0.73505900 |             |             |   |
| H          | -4.75311000 | 3.18028900  | - |
| 1.83601700 |             |             |   |
| C          | -5.72764800 | 5.53011200  |   |
| 0.42894800 |             |             |   |
| H          | -4.73436000 | 5.91286100  |   |
| 2.30598600 |             |             |   |
| H          | -6.49120300 | 4.91949700  | - |
| 1.49474200 |             |             |   |
| H          | -6.48771100 | 6.29177900  |   |
| 0.58115100 |             |             |   |
| C          | 3.17667200  | 3.63403400  | - |
| 0.75973800 |             |             |   |
| C          | 3.93047200  | 3.91469200  | - |
| 1.90814600 |             |             |   |
| C          | 3.43447800  | 4.36037300  |   |
| 0.41372600 |             |             |   |
| C          | 4.92032900  | 4.89905400  | - |
| 1.88494400 |             |             |   |
| H          | 3.73414000  | 3.35535700  | - |
| 2.81865700 |             |             |   |
| C          | 4.42391100  | 5.34424500  |   |
| 0.43735800 |             |             |   |

|                         |             |             |   |
|-------------------------|-------------|-------------|---|
| H                       | 2.84922600  | 4.14266600  |   |
| 1.30317700              |             |             |   |
| C                       | 5.16991900  | 5.61596600  | - |
| 0.71239100              |             |             |   |
| H                       | 5.49385900  | 5.10815200  | - |
| 2.78418100              |             |             |   |
| H                       | 4.61372400  | 5.89682500  |   |
| 1.35390100              |             |             |   |
| H                       | 5.94030000  | 6.38227700  | - |
| 0.69493000              |             |             |   |
| C                       | 3.24850900  | -3.35338100 | - |
| 0.66662800              |             |             |   |
| C                       | 3.40981300  | -4.17096700 |   |
| 0.46343900              |             |             |   |
| C                       | 4.10636700  | -3.54684500 | - |
| 1.76041300              |             |             |   |
| C                       | 4.40379400  | -5.14925900 |   |
| 0.50298100              |             |             |   |
| H                       | 2.74477500  | -4.03098800 |   |
| 1.31020900              |             |             |   |
| C                       | 5.10221300  | -4.52388800 | - |
| 1.72221900              |             |             |   |
| H                       | 3.98308200  | -2.92479700 | - |
| 2.64233200              |             |             |   |
| C                       | 5.25534500  | -5.32742900 | - |
| 0.58993300              |             |             |   |
| H                       | 4.51428700  | -5.77125500 |   |
| 1.38758900              |             |             |   |
| H                       | 5.75457700  | -4.66153800 | - |
| 2.58050100              |             |             |   |
| H                       | 6.03004000  | -6.08890500 | - |
| 0.56086300              |             |             |   |
| <b><sup>5</sup>INT8</b> |             |             |   |
| Fe                      | 0.26639000  | 0.10295500  | - |
| 0.41558300              |             |             |   |
| N                       | 2.33143800  | -0.21153000 | - |
| 0.36242500              |             |             |   |
| C                       | -1.77074300 | 2.85978000  | - |
| 0.67314500              |             |             |   |
| C                       | 3.06332500  | 2.14937100  | - |
| 0.21507700              |             |             |   |
| C                       | 1.58320200  | 4.19763300  | - |
| 0.43196300              |             |             |   |

|            |             |             |   |
|------------|-------------|-------------|---|
| C          | 0.23832200  | 4.39244100  | - |
| 0.55071600 |             |             |   |
| C          | 1.80343200  | 2.77005700  | - |
| 0.35452400 |             |             |   |
| C          | -0.38389900 | 3.08752100  | - |
| 0.55662800 |             |             |   |
| H          | -0.28522900 | 5.33275900  | - |
| 0.64566800 |             |             |   |
| H          | 2.35755300  | 4.95063300  | - |
| 0.41115100 |             |             |   |
| N          | -0.03221600 | -1.94783200 | - |
| 0.56934600 |             |             |   |
| N          | 0.59301500  | 2.12498300  | - |
| 0.45106300 |             |             |   |
| N          | -1.76690900 | 0.38271500  | - |
| 0.77209400 |             |             |   |
| C          | 2.34020600  | -2.68848700 | - |
| 0.42907800 |             |             |   |
| C          | -2.50991500 | -1.97587400 | - |
| 0.77034800 |             |             |   |
| C          | -4.04308700 | 0.05010900  | - |
| 0.81058300 |             |             |   |
| C          | 4.58346800  | 0.12246100  | - |
| 0.02750600 |             |             |   |
| C          | -1.00710600 | -4.01590900 | - |
| 0.80404800 |             |             |   |
| C          | -3.83279200 | 1.39543800  | - |
| 0.79684000 |             |             |   |
| C          | 4.38293900  | -1.22273900 | - |
| 0.09528300 |             |             |   |
| C          | 0.34134100  | -4.21151000 | - |
| 0.72548600 |             |             |   |
| C          | -2.73941500 | -0.58548100 | - |
| 0.80003100 |             |             |   |
| C          | 3.29175500  | 0.75705500  | - |
| 0.21003700 |             |             |   |
| C          | -1.24065900 | -2.59291100 | - |
| 0.70363700 |             |             |   |
| C          | -2.39863700 | 1.60267600  | - |
| 0.76736500 |             |             |   |
| C          | 2.96507000  | -1.43057800 | - |
| 0.31500600 |             |             |   |
| C          | 0.95335200  | -2.91260100 | - |
| 0.56695400 |             |             |   |

|            |             |             |   |
|------------|-------------|-------------|---|
| H          | -4.57744000 | 2.17796700  | - |
| 0.78485800 |             |             |   |
| H          | 5.11988800  | -2.00587100 |   |
| 0.00764400 |             |             |   |
| H          | 0.87489300  | -5.14897200 | - |
| 0.78423800 |             |             |   |
| H          | -4.99130000 | -0.46721800 | - |
| 0.80815800 |             |             |   |
| H          | 5.51577900  | 0.64139700  |   |
| 0.14159100 |             |             |   |
| H          | -1.77246400 | -4.76538500 | - |
| 0.94486100 |             |             |   |
| C          | -2.01482200 | -1.37634400 |   |
| 2.74659400 |             |             |   |
| C          | -1.33542000 | -0.20209700 |   |
| 2.39712300 |             |             |   |
| C          | -3.21201000 | 1.07344700  |   |
| 2.58036700 |             |             |   |
| C          | -3.99288400 | -0.02491100 |   |
| 2.94298500 |             |             |   |
| C          | -3.37396000 | -1.27248200 |   |
| 3.02862100 |             |             |   |
| H          | -1.50655700 | -2.33517400 |   |
| 2.76302000 |             |             |   |
| H          | -3.65345800 | 2.06240700  |   |
| 2.48073800 |             |             |   |
| H          | -5.05377600 | 0.09394400  |   |
| 3.13645200 |             |             |   |
| H          | -3.94467700 | -2.15937600 |   |
| 3.28763000 |             |             |   |
| N          | 0.04408300  | -0.19785000 |   |
| 2.00944400 |             |             |   |
| N          | -1.90377500 | 0.99685100  |   |
| 2.31680200 |             |             |   |
| N          | 1.47110100  | -1.99306400 |   |
| 2.63556200 |             |             |   |
| N          | 0.73468100  | -1.16984800 |   |
| 2.37297200 |             |             |   |
| C          | -2.66010100 | 4.06133900  | - |
| 0.63602300 |             |             |   |
| C          | -3.41053300 | 4.44919300  | - |
| 1.75577600 |             |             |   |
| C          | -2.76782800 | 4.81589200  |   |
| 0.54321100 |             |             |   |



|            |             |             |   |
|------------|-------------|-------------|---|
| C          | -4.24883700 | 5.56399500  | - |
| 1.69892800 |             |             |   |
| H          | -3.32983700 | 3.86971300  | - |
| 2.67121300 |             |             |   |
| C          | -3.60597400 | 5.93023700  |   |
| 0.60076900 |             |             |   |
| H          | -2.18790700 | 4.51529600  |   |
| 1.41160300 |             |             |   |
| C          | -4.34919800 | 6.30744600  | - |
| 0.52057000 |             |             |   |
| H          | -4.82024800 | 5.85407800  | - |
| 2.57681600 |             |             |   |
| H          | -3.68051200 | 6.50225500  |   |
| 1.52204400 |             |             |   |
| H          | -5.00153100 | 7.17555000  | - |
| 0.47674700 |             |             |   |
| C          | 4.25306200  | 3.04226500  | - |
| 0.06626700 |             |             |   |
| C          | 4.38908200  | 3.87161500  |   |
| 1.05834600 |             |             |   |
| C          | 5.25767700  | 3.07076100  | - |
| 1.04649500 |             |             |   |
| C          | 5.49877300  | 4.70580500  |   |
| 1.19952700 |             |             |   |
| H          | 3.61677000  | 3.85331500  |   |
| 1.82211800 |             |             |   |
| C          | 6.36805700  | 3.90416500  | - |
| 0.90599800 |             |             |   |
| H          | 5.15754600  | 2.43498500  | - |
| 1.92165000 |             |             |   |
| C          | 6.49218900  | 4.72452100  |   |
| 0.21774000 |             |             |   |
| H          | 5.58924200  | 5.33774000  |   |
| 2.07918900 |             |             |   |
| H          | 7.13364000  | 3.91616400  | - |
| 1.67739100 |             |             |   |
| H          | 7.35664700  | 5.37390500  |   |
| 0.32735400 |             |             |   |
| C          | 3.22247700  | -3.89496100 | - |
| 0.37088700 |             |             |   |
| C          | 3.15206500  | -4.77688000 |   |
| 0.71874400 |             |             |   |
| C          | 4.13977100  | -4.16453100 | - |
| 1.39785000 |             |             |   |

|               |             |             |   |
|---------------|-------------|-------------|---|
| C             | 3.97631000  | -5.90131700 |   |
| 0.77832600    |             |             |   |
| H             | 2.45033000  | -4.56606700 |   |
| 1.52044800    |             |             |   |
| C             | 4.96439400  | -5.28901100 | - |
| 1.33896400    |             |             |   |
| H             | 4.19859400  | -3.48514000 | - |
| 2.24358200    |             |             |   |
| C             | 4.88453500  | -6.16118500 | - |
| 0.25080600    |             |             |   |
| H             | 3.91282800  | -6.57159700 |   |
| 1.63162600    |             |             |   |
| H             | 5.66626100  | -5.48558100 | - |
| 2.14521100    |             |             |   |
| H             | 5.52651600  | -7.03684700 | - |
| 0.20460200    |             |             |   |
| C             | -3.70487800 | -2.87185100 | - |
| 0.79014800    |             |             |   |
| C             | -4.58449300 | -2.88689800 | - |
| 1.88420900    |             |             |   |
| C             | -3.97701000 | -3.71806600 |   |
| 0.29741600    |             |             |   |
| C             | -5.70526500 | -3.71835900 | - |
| 1.88835800    |             |             |   |
| H             | -4.37826200 | -2.24192500 | - |
| 2.73351700    |             |             |   |
| C             | -5.09615600 | -4.55097300 |   |
| 0.29457700    |             |             |   |
| H             | -3.29945100 | -3.71388900 |   |
| 1.14596000    |             |             |   |
| C             | -5.96577700 | -4.55259700 | - |
| 0.79866500    |             |             |   |
| H             | -6.37179500 | -3.71908100 | - |
| 2.74682400    |             |             |   |
| H             | -5.29064200 | -5.19693200 |   |
| 1.14700200    |             |             |   |
| H             | -6.83790700 | -5.20086100 | - |
| 0.80264000    |             |             |   |
| <b>cssTS8</b> |             |             |   |
| Fe            | -0.21856400 | 0.06531000  | - |
| 0.32356300    |             |             |   |
| N             | -0.83201600 | 1.98424400  | - |
| 0.42996200    |             |             |   |

|            |             |             |   |
|------------|-------------|-------------|---|
| C          | -1.82183300 | -2.97287700 | - |
| 0.32362500 |             |             |   |
| C          | -3.27887800 | 1.67581300  | - |
| 0.38212100 |             |             |   |
| C          | -4.43501800 | -0.53118000 | - |
| 0.65601300 |             |             |   |
| C          | -4.02963500 | -1.82840600 | - |
| 0.63104800 |             |             |   |
| C          | -3.25517700 | 0.28231100  | - |
| 0.49698600 |             |             |   |
| C          | -2.59769600 | -1.81815000 | - |
| 0.46755200 |             |             |   |
| H          | -4.63494700 | -2.71784400 | - |
| 0.72610300 |             |             |   |
| H          | -5.43801400 | -0.14955700 | - |
| 0.77657900 |             |             |   |
| N          | 1.65362700  | 0.65438600  | - |
| 0.71541900 |             |             |   |
| N          | -2.12765500 | -0.51829100 | - |
| 0.43328200 |             |             |   |
| N          | 0.36580300  | -1.84339900 | - |
| 0.54094300 |             |             |   |
| C          | 1.36594700  | 3.09994900  | - |
| 0.46936200 |             |             |   |
| C          | 2.79862300  | -1.53283500 | - |
| 0.84980400 |             |             |   |
| C          | 1.68990100  | -3.73497900 | - |
| 0.37994200 |             |             |   |
| C          | -2.11395400 | 3.87753400  | - |
| 0.05945700 |             |             |   |
| C          | 3.92188700  | 0.68360900  | - |
| 1.18754200 |             |             |   |
| C          | 0.40237300  | -4.13320600 | - |
| 0.19067100 |             |             |   |
| C          | -0.81389400 | 4.27131700  | - |
| 0.05963100 |             |             |   |
| C          | 3.52417400  | 1.97613800  | - |
| 1.05210200 |             |             |   |
| C          | 1.66047000  | -2.31226700 | - |
| 0.61353800 |             |             |   |
| C          | -2.11982400 | 2.45246600  | - |
| 0.29923100 |             |             |   |
| C          | 2.76337600  | -0.13968800 | - |
| 0.93639500 |             |             |   |

|            |             |             |   |
|------------|-------------|-------------|---|
| C          | -0.42380900 | -2.95857800 | - |
| 0.32766300 |             |             |   |
| C          | -0.01972300 | 3.09174800  | - |
| 0.31267200 |             |             |   |
| C          | 2.11707900  | 1.95197100  | - |
| 0.73672100 |             |             |   |
| H          | 0.03717100  | -5.12959200 |   |
| 0.01013900 |             |             |   |
| H          | -0.41749200 | 5.26422700  |   |
| 0.09386300 |             |             |   |
| H          | 4.11545000  | 2.87259200  | - |
| 1.16883500 |             |             |   |
| H          | 2.58334700  | -4.34138600 | - |
| 0.35773300 |             |             |   |
| H          | -2.99407300 | 4.48387700  |   |
| 0.09601900 |             |             |   |
| H          | 4.90451100  | 0.31094400  | - |
| 1.43621800 |             |             |   |
| C          | 1.67492400  | -1.38548900 |   |
| 2.42916900 |             |             |   |
| C          | 1.20877100  | -0.10625300 |   |
| 2.09175700 |             |             |   |
| C          | 3.14475500  | 0.88413800  |   |
| 2.79411600 |             |             |   |
| C          | 3.69932500  | -0.33495700 |   |
| 3.18861100 |             |             |   |
| C          | 2.93764100  | -1.49032200 |   |
| 3.00463200 |             |             |   |
| H          | 1.07857700  | -2.26296400 |   |
| 2.20968300 |             |             |   |
| H          | 3.70649700  | 1.80944300  |   |
| 2.90901200 |             |             |   |
| H          | 4.69443800  | -0.37401800 |   |
| 3.62078000 |             |             |   |
| H          | 3.33101700  | -2.46568300 |   |
| 3.27707800 |             |             |   |
| N          | -0.07053300 | 0.14554500  |   |
| 1.49781100 |             |             |   |
| N          | 1.91826600  | 1.01042400  |   |
| 2.27862200 |             |             |   |
| N          | -2.18613600 | -0.93345600 |   |
| 2.43025800 |             |             |   |
| N          | -1.08017000 | -0.80971800 |   |
| 2.25414500 |             |             |   |

|            |             |            |   |
|------------|-------------|------------|---|
| C          | -4.60295200 | 2.36298200 | - |
| 0.32415000 |             |            |   |
| C          | -4.98385200 | 3.27143800 | - |
| 1.32412700 |             |            |   |
| C          | -5.49057600 | 2.11652700 |   |
| 0.73529900 |             |            |   |
| C          | -6.22046400 | 3.91543800 | - |
| 1.26760000 |             |            |   |
| H          | -4.30209800 | 3.46540400 | - |
| 2.14736500 |             |            |   |
| C          | -6.72659100 | 2.76120000 |   |
| 0.79305500 |             |            |   |
| H          | -5.19931800 | 1.41719800 |   |
| 1.51387100 |             |            |   |
| C          | -7.09551100 | 3.66233400 | - |
| 0.20861400 |             |            |   |
| H          | -6.50175600 | 4.61181200 | - |
| 2.05317300 |             |            |   |
| H          | -7.39945500 | 2.56282400 |   |
| 1.62316900 |             |            |   |
| H          | -8.05837300 | 4.16421100 | - |
| 0.16407900 |             |            |   |
| C          | 2.09616300  | 4.39506700 | - |
| 0.33090900 |             |            |   |
| C          | 2.94514400  | 4.59790100 |   |
| 0.76790600 |             |            |   |
| C          | 1.95537600  | 5.42015300 | - |
| 1.27733700 |             |            |   |
| C          | 3.63790300  | 5.79968200 |   |
| 0.91658300 |             |            |   |
| H          | 3.04050000  | 3.80540800 |   |
| 1.50448200 |             |            |   |
| C          | 2.65052100  | 6.62183300 | - |
| 1.13009900 |             |            |   |
| H          | 1.30035700  | 5.26571400 | - |
| 2.13026800 |             |            |   |
| C          | 3.49350200  | 6.81443800 | - |
| 0.03309500 |             |            |   |
| H          | 4.28750900  | 5.94584300 |   |
| 1.77571400 |             |            |   |
| H          | 2.53595000  | 7.40582200 | - |
| 1.87406300 |             |            |   |
| H          | 4.03406000  | 7.75023900 |   |
| 0.08159700 |             |            |   |

|            |             |             |   |
|------------|-------------|-------------|---|
| C          | 4.11712200  | -2.22358300 | - |
| 0.96412200 |             |             |   |
| C          | 4.37099100  | -3.12025100 | - |
| 2.01350200 |             |             |   |
| C          | 5.12448100  | -1.99623800 | - |
| 0.01265300 |             |             |   |
| C          | 5.60114100  | -3.77196700 | - |
| 2.11111900 |             |             |   |
| H          | 3.59580500  | -3.29918600 | - |
| 2.75326100 |             |             |   |
| C          | 6.35386000  | -2.64895500 | - |
| 0.10954700 |             |             |   |
| H          | 4.92882200  | -1.30773900 |   |
| 0.80373900 |             |             |   |
| C          | 6.59631700  | -3.53860000 | - |
| 1.15900600 |             |             |   |
| H          | 5.78340000  | -4.45876900 | - |
| 2.93346800 |             |             |   |
| H          | 7.12199800  | -2.46497800 |   |
| 0.63729000 |             |             |   |
| H          | 7.55424400  | -4.04617000 | - |
| 1.23485200 |             |             |   |
| C          | -2.52719600 | -4.27997200 | - |
| 0.17165900 |             |             |   |
| C          | -3.34240100 | -4.51611500 |   |
| 0.94692200 |             |             |   |
| C          | -2.39755400 | -5.29121700 | - |
| 1.13635700 |             |             |   |
| C          | -4.00649900 | -5.73369000 |   |
| 1.09923800 |             |             |   |
| H          | -3.44765300 | -3.73549400 |   |
| 1.69513400 |             |             |   |
| C          | -3.06321400 | -6.50835800 | - |
| 0.98542700 |             |             |   |
| H          | -1.77406900 | -5.11184300 | - |
| 2.00759900 |             |             |   |
| C          | -3.86867300 | -6.73359100 |   |
| 0.13345200 |             |             |   |
| H          | -4.62962200 | -5.90196900 |   |
| 1.97364400 |             |             |   |
| H          | -2.95667600 | -7.27859300 | - |
| 1.74474800 |             |             |   |
| H          | -4.38681800 | -7.68156000 |   |
| 0.25109900 |             |             |   |

**oss-TS8**

|            |             |             |   |
|------------|-------------|-------------|---|
| Fe         | -0.24294800 | 0.05755700  | - |
| 0.33543600 |             |             |   |
| N          | -1.10373400 | 1.85363300  | - |
| 0.48991400 |             |             |   |
| C          | -1.39354100 | -3.15524400 | - |
| 0.21030000 |             |             |   |
| C          | -3.49271900 | 1.22041000  | - |
| 0.55038500 |             |             |   |
| C          | -4.32190100 | -1.13832000 | - |
| 0.69644300 |             |             |   |
| C          | -3.74044300 | -2.35785800 | - |
| 0.54817800 |             |             |   |
| C          | -3.27272800 | -0.15686200 | - |
| 0.58956500 |             |             |   |
| C          | -2.32757300 | -2.13165300 | - |
| 0.38705700 |             |             |   |
| H          | -4.21107300 | -3.32973500 | - |
| 0.57089800 |             |             |   |
| H          | -5.36507100 | -0.91310900 | - |
| 0.86066200 |             |             |   |
| N          | 1.52921400  | 0.90214000  | - |
| 0.75025800 |             |             |   |
| N          | -2.04549200 | -0.78233500 | - |
| 0.45036800 |             |             |   |
| N          | 0.58957300  | -1.73734900 | - |
| 0.62685500 |             |             |   |
| C          | 0.92064000  | 3.25869800  | - |
| 0.34078700 |             |             |   |
| C          | 2.94814100  | -1.09706300 | - |
| 1.03144600 |             |             |   |
| C          | 2.17560900  | -3.41851300 | - |
| 0.51433500 |             |             |   |
| C          | -2.64828400 | 3.54225400  | - |
| 0.14417200 |             |             |   |
| C          | 3.76426600  | 1.26389000  | - |
| 1.23963000 |             |             |   |
| C          | 0.97285400  | -3.98446900 | - |
| 0.21836900 |             |             |   |
| C          | -1.41375100 | 4.10129600  | - |
| 0.02476700 |             |             |   |
| C          | 3.20708100  | 2.47738600  | - |
| 0.98563500 |             |             |   |

|            |             |             |   |
|------------|-------------|-------------|---|
| C          | 1.93528300  | -2.02234100 | - |
| 0.76125000 |             |             |   |
| C          | -2.45125100 | 2.14312100  | - |
| 0.42292400 |             |             |   |
| C          | 2.72782700  | 0.27991900  | - |
| 1.04172200 |             |             |   |
| C          | -0.01734600 | -2.94557700 | - |
| 0.32165900 |             |             |   |
| C          | -0.45497000 | 3.05574000  | - |
| 0.26775200 |             |             |   |
| C          | 1.82008700  | 2.24306200  | - |
| 0.67177200 |             |             |   |
| H          | 0.76727000  | -5.01330900 |   |
| 0.03734900 |             |             |   |
| H          | -1.16526800 | 5.12814000  |   |
| 0.19950000 |             |             |   |
| H          | 3.67332100  | 3.45098600  | - |
| 1.02676400 |             |             |   |
| H          | 3.14570600  | -3.89228500 | - |
| 0.54167900 |             |             |   |
| H          | -3.61028400 | 4.01985000  | - |
| 0.03103100 |             |             |   |
| H          | 4.78133600  | 1.04225200  | - |
| 1.52688300 |             |             |   |
| C          | 1.79146000  | -1.32232600 |   |
| 2.40073400 |             |             |   |
| C          | 1.28396700  | -0.06024800 |   |
| 2.04711900 |             |             |   |
| C          | 3.25016500  | 0.96522700  |   |
| 2.63127100 |             |             |   |
| C          | 3.84134600  | -0.23728400 |   |
| 3.02271800 |             |             |   |
| C          | 3.08411900  | -1.40511600 |   |
| 2.90578100 |             |             |   |
| H          | 1.18636600  | -2.20799700 |   |
| 2.24720500 |             |             |   |
| H          | 3.80635300  | 1.89938600  |   |
| 2.69515500 |             |             |   |
| H          | 4.85860400  | -0.25504100 |   |
| 3.40225800 |             |             |   |
| H          | 3.50246500  | -2.36977400 |   |
| 3.18007600 |             |             |   |
| N          | -0.02351200 | 0.10793200  |   |
| 1.51151600 |             |             |   |



|            |             |             |   |
|------------|-------------|-------------|---|
| N          | 1.99802100  | 1.06726600  |   |
| 2.17446200 |             |             |   |
| N          | -2.13594300 | -0.79235500 |   |
| 2.35420000 |             |             |   |
| N          | -0.99061800 | -0.68859300 |   |
| 2.42768700 |             |             |   |
| C          | -4.89471400 | 1.73033600  | - |
| 0.57204500 |             |             |   |
| C          | -5.33752300 | 2.55538600  | - |
| 1.61750500 |             |             |   |
| C          | -5.79010200 | 1.40713700  |   |
| 0.46000800 |             |             |   |
| C          | -6.64595600 | 3.04004000  | - |
| 1.63507500 |             |             |   |
| H          | -4.64777600 | 2.81029400  | - |
| 2.41727800 |             |             |   |
| C          | -7.09761100 | 1.89365200  |   |
| 0.44324200 |             |             |   |
| H          | -5.44738100 | 0.77748300  |   |
| 1.27606900 |             |             |   |
| C          | -7.52968000 | 2.71014800  | - |
| 0.60482500 |             |             |   |
| H          | -6.97549000 | 3.67266700  | - |
| 2.45500200 |             |             |   |
| H          | -7.77712100 | 1.63922100  |   |
| 1.25229600 |             |             |   |
| H          | -8.54834700 | 3.08840800  | - |
| 0.61771700 |             |             |   |
| C          | 1.47951800  | 4.60673300  | - |
| 0.03114600 |             |             |   |
| C          | 2.23949600  | 4.76934600  |   |
| 1.13792800 |             |             |   |
| C          | 1.27438400  | 5.70913700  | - |
| 0.87215300 |             |             |   |
| C          | 2.78113100  | 6.01423700  |   |
| 1.45884000 |             |             |   |
| H          | 2.37738800  | 3.91051200  |   |
| 1.78916500 |             |             |   |
| C          | 1.82081600  | 6.95336400  | - |
| 0.55150000 |             |             |   |
| H          | 0.69047600  | 5.58269000  | - |
| 1.77970500 |             |             |   |
| C          | 2.57482900  | 7.10835800  |   |
| 0.61413700 |             |             |   |

|            |             |             |   |
|------------|-------------|-------------|---|
| H          | 3.36171300  | 6.13154500  |   |
| 2.37016900 |             |             |   |
| H          | 1.66030600  | 7.79998300  | - |
| 1.21381600 |             |             |   |
| H          | 2.99893700  | 8.07743500  |   |
| 0.86338600 |             |             |   |
| C          | 4.33587800  | -1.60953200 | - |
| 1.23075300 |             |             |   |
| C          | 4.64884600  | -2.40868500 | - |
| 2.34075800 |             |             |   |
| C          | 5.34545100  | -1.31690500 | - |
| 0.30025700 |             |             |   |
| C          | 5.94325100  | -2.89816100 | - |
| 2.52128200 |             |             |   |
| H          | 3.86966000  | -2.63998900 | - |
| 3.06168300 |             |             |   |
| C          | 6.63875800  | -1.80858300 | - |
| 0.48018300 |             |             |   |
| H          | 5.10063300  | -0.71110000 |   |
| 0.56688800 |             |             |   |
| C          | 6.94189800  | -2.59915700 | - |
| 1.59145400 |             |             |   |
| H          | 6.17188800  | -3.51044100 | - |
| 3.38955300 |             |             |   |
| H          | 7.40928100  | -1.57778000 |   |
| 0.25090000 |             |             |   |
| H          | 7.94966700  | -2.98094100 | - |
| 1.73144600 |             |             |   |
| C          | -1.90459600 | -4.52569700 |   |
| 0.08241700 |             |             |   |
| C          | -2.62134800 | -4.75984000 |   |
| 1.26716500 |             |             |   |
| C          | -1.69855900 | -5.59216200 | - |
| 0.80624500 |             |             |   |
| C          | -3.11191000 | -6.03280700 |   |
| 1.55928200 |             |             |   |
| H          | -2.78490500 | -3.93417800 |   |
| 1.95417100 |             |             |   |
| C          | -2.19197900 | -6.86452800 | - |
| 0.51465000 |             |             |   |
| H          | -1.15564500 | -5.41338200 | - |
| 1.73002100 |             |             |   |
| C          | -2.89821800 | -7.08859700 |   |
| 0.66963200 |             |             |   |

|                        |             |             |   |
|------------------------|-------------|-------------|---|
| H                      | -3.65958000 | -6.19995200 |   |
| 2.48291700             |             |             |   |
| H                      | -2.02989700 | -7.67909100 | - |
| 1.21560300             |             |             |   |
| H                      | -3.28183300 | -8.07969600 |   |
| 0.89655100             |             |             |   |
| <b><sup>3</sup>TS8</b> |             |             |   |
| Fe                     | -0.20312900 | 0.08559900  | - |
| 0.30800400             |             |             |   |
| N                      | -2.03258900 | 0.87867900  | - |
| 0.34982900             |             |             |   |
| C                      | 1.01147500  | -3.08352100 | - |
| 0.28203800             |             |             |   |
| C                      | -3.42723400 | -1.12994300 | - |
| 0.73542300             |             |             |   |
| C                      | -2.53001600 | -3.47643000 | - |
| 0.73550900             |             |             |   |
| C                      | -1.30313000 | -4.01838900 | - |
| 0.50455300             |             |             |   |
| C                      | -2.37175300 | -2.04436700 | - |
| 0.69032500             |             |             |   |
| C                      | -0.37615400 | -2.92121400 | - |
| 0.38004800             |             |             |   |
| H                      | -1.03155900 | -5.06332900 | - |
| 0.46626600             |             |             |   |
| H                      | -3.46308900 | -3.99109500 | - |
| 0.91079700             |             |             |   |
| N                      | 0.57102800  | 1.88842700  | - |
| 0.54442100             |             |             |   |
| N                      | -1.04188600 | -1.72190200 | - |
| 0.50360600             |             |             |   |
| N                      | 1.56325300  | -0.72030700 | - |
| 0.74241800             |             |             |   |
| C                      | -1.41140100 | 3.22375600  |   |
| 0.09775700             |             |             |   |
| C                      | 2.89688900  | 1.32570000  | - |
| 1.14576000             |             |             |   |
| C                      | 3.85296100  | -0.97547800 | - |
| 0.91835600             |             |             |   |
| C                      | -4.32700100 | 1.14957000  | - |
| 0.23192000             |             |             |   |
| C                      | 2.00912100  | 3.66140500  | - |
| 0.90012700             |             |             |   |

|            |             |             |   |
|------------|-------------|-------------|---|
| C          | 3.34013300  | -2.19126800 | - |
| 0.58510400 |             |             |   |
| C          | -3.76478000 | 2.34098700  |   |
| 0.10904700 |             |             |   |
| C          | 0.83335600  | 4.18244700  | - |
| 0.45862400 |             |             |   |
| C          | 2.74725700  | -0.05561700 | - |
| 0.98883000 |             |             |   |
| C          | -3.24706200 | 0.23422300  | - |
| 0.49416200 |             |             |   |
| C          | 1.85837200  | 2.22713400  | - |
| 0.90468800 |             |             |   |
| C          | 1.91027700  | -2.03840000 | - |
| 0.50691400 |             |             |   |
| C          | -2.33716100 | 2.18140200  | - |
| 0.00750600 |             |             |   |
| C          | -0.06431200 | 3.07397900  | - |
| 0.24598900 |             |             |   |
| H          | 3.87621200  | -3.11210700 | - |
| 0.41029100 |             |             |   |
| H          | -4.26544100 | 3.25272000  |   |
| 0.39925700 |             |             |   |
| H          | 0.57236600  | 5.22202400  | - |
| 0.32488500 |             |             |   |
| H          | 4.88939900  | -0.70806300 | - |
| 1.06137900 |             |             |   |
| H          | -5.37532300 | 0.89181600  | - |
| 0.26436800 |             |             |   |
| H          | 2.90306500  | 4.19207600  | - |
| 1.19200500 |             |             |   |
| C          | 1.44643800  | -1.42549300 |   |
| 2.93352100 |             |             |   |
| C          | 1.21112300  | -0.25519800 |   |
| 2.18112500 |             |             |   |
| C          | 3.36898000  | 0.45467700  |   |
| 2.51528400 |             |             |   |
| C          | 3.69702000  | -0.66052100 |   |
| 3.28474700 |             |             |   |
| C          | 2.69976000  | -1.61573200 |   |
| 3.49929800 |             |             |   |
| H          | 0.66012200  | -2.16229200 |   |
| 3.04676400 |             |             |   |
| H          | 4.11710300  | 1.21860600  |   |
| 2.30795000 |             |             |   |

|            |             |             |   |
|------------|-------------|-------------|---|
| H          | 4.69566300  | -0.77775100 |   |
| 3.69355900 |             |             |   |
| H          | 2.90434100  | -2.51252500 |   |
| 4.07843200 |             |             |   |
| N          | -0.01774500 | -0.00868600 |   |
| 1.54376600 |             |             |   |
| N          | 2.15965800  | 0.67594000  |   |
| 1.99075000 |             |             |   |
| N          | -2.30090900 | -0.71519600 |   |
| 2.22479800 |             |             |   |
| N          | -1.19195000 | -0.59964300 |   |
| 2.47531600 |             |             |   |
| C          | -4.82060700 | -1.63290300 | - |
| 0.91919800 |             |             |   |
| C          | -5.54822400 | -1.29855400 | - |
| 2.07090000 |             |             |   |
| C          | -5.43479800 | -2.42266000 |   |
| 0.06511400 |             |             |   |
| C          | -6.85696900 | -1.75290400 | - |
| 2.24079100 |             |             |   |
| H          | -5.07867100 | -0.68177800 | - |
| 2.83222200 |             |             |   |
| C          | -6.74347300 | -2.87602100 | - |
| 0.10461600 |             |             |   |
| H          | -4.87940500 | -2.66648900 |   |
| 0.96605100 |             |             |   |
| C          | -7.45740000 | -2.54403300 | - |
| 1.25874100 |             |             |   |
| H          | -7.40628700 | -1.49014900 | - |
| 3.14097200 |             |             |   |
| H          | -7.20780400 | -3.48275000 |   |
| 0.66830800 |             |             |   |
| H          | -8.47668600 | -2.89714000 | - |
| 1.39036800 |             |             |   |
| C          | -1.87941000 | 4.58176500  |   |
| 0.50534300 |             |             |   |
| C          | -1.42776300 | 5.14012500  |   |
| 1.71108300 |             |             |   |
| C          | -2.74673400 | 5.33130200  | - |
| 0.30407000 |             |             |   |
| C          | -1.84279100 | 6.41342900  |   |
| 2.10324900 |             |             |   |
| H          | -0.75170600 | 4.56474400  |   |
| 2.33723700 |             |             |   |

|            |             |             |   |
|------------|-------------|-------------|---|
| C          | -3.16051900 | 6.60523600  |   |
| 0.08757900 |             |             |   |
| H          | -3.08771800 | 4.91012100  | - |
| 1.24559300 |             |             |   |
| C          | -2.71099000 | 7.14906700  |   |
| 1.29318500 |             |             |   |
| H          | -1.48887800 | 6.82969200  |   |
| 3.04267000 |             |             |   |
| H          | -3.82897400 | 7.17507300  | - |
| 0.55242900 |             |             |   |
| H          | -3.03342600 | 8.14103800  |   |
| 1.59807000 |             |             |   |
| C          | 4.25933700  | 1.85039200  | - |
| 1.45438300 |             |             |   |
| C          | 4.87563700  | 1.55601400  | - |
| 2.67995300 |             |             |   |
| C          | 4.96169700  | 2.62011000  | - |
| 0.51321200 |             |             |   |
| C          | 6.15950300  | 2.02550800  | - |
| 2.96138000 |             |             |   |
| H          | 4.33870400  | 0.95688300  | - |
| 3.41009200 |             |             |   |
| C          | 6.24539700  | 3.08885200  | - |
| 0.79391600 |             |             |   |
| H          | 4.48965500  | 2.84383300  |   |
| 0.43909500 |             |             |   |
| C          | 6.84784200  | 2.79350600  | - |
| 2.01941300 |             |             |   |
| H          | 6.62059200  | 1.79334100  | - |
| 3.91772600 |             |             |   |
| H          | 6.77722100  | 3.68009900  | - |
| 0.05310500 |             |             |   |
| H          | 7.84777800  | 3.15839700  | - |
| 2.23818700 |             |             |   |
| C          | 1.53612300  | -4.45192400 | - |
| 0.00036500 |             |             |   |
| C          | 1.27894600  | -5.05396000 |   |
| 1.24110800 |             |             |   |
| C          | 2.27128400  | -5.16806800 | - |
| 0.95737500 |             |             |   |
| C          | 1.75376100  | -6.33512100 |   |
| 1.52335900 |             |             |   |
| H          | 0.70609000  | -4.50510400 |   |
| 1.98303000 |             |             |   |

|            |            |             |   |
|------------|------------|-------------|---|
| C          | 2.74603000 | -6.44987700 | - |
| 0.67602400 |            |             |   |
| H          | 2.46134300 | -4.71373800 | - |
| 1.92558300 |            |             |   |
| C          | 2.49014700 | -7.03643600 |   |
| 0.56565300 |            |             |   |
| H          | 1.54982700 | -6.78472600 |   |
| 2.49157200 |            |             |   |
| H          | 3.31008800 | -6.99281400 | - |
| 1.42977900 |            |             |   |
| H          | 2.85961100 | -8.03470000 |   |
| 0.78426900 |            |             |   |

**<sup>5</sup>TS8**

|            |             |             |   |
|------------|-------------|-------------|---|
| Fe         | -0.20690100 | 0.09101400  | - |
| 0.11433800 |             |             |   |
| N          | -2.27051800 | 0.29116700  | - |
| 0.33667300 |             |             |   |
| C          | 1.91617700  | -2.58787000 | - |
| 0.68349800 |             |             |   |
| C          | -2.94064300 | -2.09361500 | - |
| 0.50968800 |             |             |   |
| C          | -1.37582900 | -4.06205400 | - |
| 0.73012000 |             |             |   |
| C          | -0.02062800 | -4.20184300 | - |
| 0.73905900 |             |             |   |
| C          | -1.65500700 | -2.64945300 | - |
| 0.60539700 |             |             |   |
| C          | 0.54160600  | -2.87412200 | - |
| 0.64583600 |             |             |   |
| H          | 0.55271200  | -5.11304100 | - |
| 0.83027300 |             |             |   |
| H          | -2.12346400 | -4.83807200 | - |
| 0.80604300 |             |             |   |
| N          | -0.05088300 | 2.12329500  | - |
| 0.48552300 |             |             |   |
| N          | -0.47265700 | -1.94741300 | - |
| 0.57246100 |             |             |   |
| N          | 1.74595300  | -0.11706900 | - |
| 0.82169900 |             |             |   |
| C          | -2.42046900 | 2.76023700  | - |
| 0.14463700 |             |             |   |
| C          | 2.39086800  | 2.27758300  | - |
| 0.86282700 |             |             |   |

|            |             |             |   |
|------------|-------------|-------------|---|
| C          | 4.00101000  | 0.34568600  | - |
| 0.92507600 |             |             |   |
| C          | -4.52376100 | -0.17130200 | - |
| 0.16310000 |             |             |   |
| C          | 0.81982300  | 4.24305300  | - |
| 0.71134000 |             |             |   |
| C          | 3.87250000  | -1.00782400 | - |
| 0.83736100 |             |             |   |
| C          | -4.37747800 | 1.17557700  | - |
| 0.01951300 |             |             |   |
| C          | -0.51805200 | 4.37897200  | - |
| 0.49453500 |             |             |   |
| C          | 2.67056700  | 0.90236200  | - |
| 0.89950700 |             |             |   |
| C          | -3.20741800 | -0.72399000 | - |
| 0.36334500 |             |             |   |
| C          | 1.11205800  | 2.82885400  | - |
| 0.69247300 |             |             |   |
| C          | 2.46039600  | -1.29711500 | - |
| 0.78082700 |             |             |   |
| C          | -2.97104300 | 1.46788100  | - |
| 0.15369900 |             |             |   |
| C          | -1.06066700 | 3.04850700  | - |
| 0.34790500 |             |             |   |
| H          | 4.66017500  | -1.74579500 | - |
| 0.80181900 |             |             |   |
| H          | -5.15031300 | 1.90830900  |   |
| 0.15989700 |             |             |   |
| H          | -1.09420900 | 5.29188000  | - |
| 0.45792000 |             |             |   |
| H          | 4.91434800  | 0.92020400  | - |
| 0.97015400 |             |             |   |
| H          | -5.43685900 | -0.74645500 | - |
| 0.11829900 |             |             |   |
| H          | 1.54502800  | 5.02434100  | - |
| 0.88599900 |             |             |   |
| C          | 1.79245800  | -1.42821000 |   |
| 2.97344000 |             |             |   |
| C          | 1.31818300  | -0.25833000 |   |
| 2.34117300 |             |             |   |
| C          | 3.37442800  | 0.75056200  |   |
| 2.53588600 |             |             |   |
| C          | 3.93568500  | -0.35084000 |   |
| 3.17914500 |             |             |   |



|            |             |             |   |
|------------|-------------|-------------|---|
| C          | 3.11230400  | -1.45833500 |   |
| 3.40324200 |             |             |   |
| H          | 1.13938500  | -2.28370200 |   |
| 3.09797000 |             |             |   |
| H          | 3.97606600  | 1.63236100  |   |
| 2.32030900 |             |             |   |
| H          | 4.97669000  | -0.34366400 |   |
| 3.48567300 |             |             |   |
| H          | 3.50290600  | -2.34909900 |   |
| 3.88871700 |             |             |   |
| N          | 0.03058200  | -0.12671700 |   |
| 1.80149800 |             |             |   |
| N          | 2.09832200  | 0.81831300  |   |
| 2.14312200 |             |             |   |
| N          | -2.09479800 | -1.22200700 |   |
| 2.47545100 |             |             |   |
| N          | -0.96689300 | -1.09716000 |   |
| 2.60392600 |             |             |   |
| C          | -4.10590600 | -3.03035000 | - |
| 0.51303800 |             |             |   |
| C          | -4.99079000 | -3.07070800 | - |
| 1.60040100 |             |             |   |
| C          | -4.33524000 | -3.87987100 |   |
| 0.57987200 |             |             |   |
| C          | -6.07920700 | -3.94464400 | - |
| 1.59770300 |             |             |   |
| H          | -4.81694400 | -2.41359100 | - |
| 2.44801500 |             |             |   |
| C          | -5.42354300 | -4.75335600 |   |
| 0.58262300 |             |             |   |
| H          | -3.65834200 | -3.83979000 |   |
| 1.42837800 |             |             |   |
| C          | -6.29771000 | -4.78882300 | - |
| 0.50654400 |             |             |   |
| H          | -6.75405300 | -3.96797200 | - |
| 2.44928700 |             |             |   |
| H          | -5.59154500 | -5.40211400 |   |
| 1.43820700 |             |             |   |
| H          | -7.14516800 | -5.46909700 | - |
| 0.50419700 |             |             |   |
| C          | -3.34501500 | 3.91788200  |   |
| 0.05569900 |             |             |   |
| C          | -3.24776600 | 4.70830700  |   |
| 1.21119300 |             |             |   |

|            |             |             |   |
|------------|-------------|-------------|---|
| C          | -4.31380200 | 4.24381900  | - |
| 0.90581700 |             |             |   |
| C          | -4.10201700 | 5.79505900  |   |
| 1.40288400 |             |             |   |
| H          | -2.49866200 | 4.46055900  |   |
| 1.95795200 |             |             |   |
| C          | -5.16762300 | 5.33097200  | - |
| 0.71477800 |             |             |   |
| H          | -4.38866500 | 3.63977600  | - |
| 1.80567100 |             |             |   |
| C          | -5.06453900 | 6.10924200  |   |
| 0.44061800 |             |             |   |
| H          | -4.01727500 | 6.39406600  |   |
| 2.30568900 |             |             |   |
| H          | -5.90970100 | 5.57271900  | - |
| 1.47109400 |             |             |   |
| H          | -5.72946900 | 6.95575000  |   |
| 0.58955500 |             |             |   |
| C          | 3.54789700  | 3.21991800  | - |
| 0.92395400 |             |             |   |
| C          | 4.32774800  | 3.34345300  | - |
| 2.08302100 |             |             |   |
| C          | 3.88203200  | 3.98816300  |   |
| 0.20308200 |             |             |   |
| C          | 5.41707700  | 4.21578400  | - |
| 2.11578100 |             |             |   |
| H          | 4.07199100  | 2.75181900  | - |
| 2.95761300 |             |             |   |
| C          | 4.97197800  | 4.85875300  |   |
| 0.17057800 |             |             |   |
| H          | 3.27893200  | 3.88915600  |   |
| 1.10140000 |             |             |   |
| C          | 5.74236200  | 4.97504400  | - |
| 0.98929300 |             |             |   |
| H          | 6.00924500  | 4.30470500  | - |
| 3.02274500 |             |             |   |
| H          | 5.22134200  | 5.44363700  |   |
| 1.05201800 |             |             |   |
| H          | 6.59087100  | 5.65347700  | - |
| 1.01524700 |             |             |   |
| C          | 2.86059700  | -3.74393300 | - |
| 0.61704000 |             |             |   |
| C          | 2.96382000  | -4.49464800 |   |
| 0.56409100 |             |             |   |

|                |             |             |   |
|----------------|-------------|-------------|---|
| C              | 3.65359200  | -4.10188900 | - |
| 1.71731900     |             |             |   |
| C              | 3.84090200  | -5.57682300 |   |
| 0.64393200     |             |             |   |
| H              | 2.35633900  | -4.21327000 |   |
| 1.41948400     |             |             |   |
| C              | 4.53047500  | -5.18495500 | - |
| 1.63826100     |             |             |   |
| H              | 3.57373200  | -3.52635100 | - |
| 2.63526900     |             |             |   |
| C              | 4.62651800  | -5.92515800 | - |
| 0.45749900     |             |             |   |
| H              | 3.91304700  | -6.14600600 |   |
| 1.56703200     |             |             |   |
| H              | 5.13494500  | -5.45314700 | - |
| 2.50069500     |             |             |   |
| H              | 5.30912900  | -6.76847300 | - |
| 0.39624200     |             |             |   |
| <b>CSSINT9</b> |             |             |   |
| Fe             | 0.26693100  | 0.00209500  | - |
| 0.20426400     |             |             |   |
| N              | 2.01444200  | 1.01314100  | - |
| 0.22769700     |             |             |   |
| C              | -0.58716300 | -3.28873200 | - |
| 0.30105100     |             |             |   |
| C              | 3.62037400  | -0.84647000 | - |
| 0.44147400     |             |             |   |
| C              | 2.98911100  | -3.26160200 | - |
| 0.57186200     |             |             |   |
| C              | 1.82139300  | -3.94465900 | - |
| 0.44075800     |             |             |   |
| C              | 2.66226700  | -1.85750500 | - |
| 0.53787900     |             |             |   |
| C              | 0.76581200  | -2.96661900 | - |
| 0.39859000     |             |             |   |
| H              | 1.67427900  | -5.01361200 | - |
| 0.39385600     |             |             |   |
| H              | 3.98862800  | -3.66148100 | - |
| 0.65541200     |             |             |   |
| N              | -0.67795700 | 1.70051900  | - |
| 0.59235000     |             |             |   |
| N              | 1.29117700  | -1.69081900 | - |
| 0.48753500     |             |             |   |

|            |             |             |   |
|------------|-------------|-------------|---|
| N          | -1.41618300 | -0.99648900 | - |
| 0.64713700 |             |             |   |
| C          | 1.13188900  | 3.29613700  |   |
| 0.00625600 |             |             |   |
| C          | -2.96696600 | 0.87119300  | - |
| 1.05762000 |             |             |   |
| C          | -3.65889400 | -1.53011900 | - |
| 0.86811200 |             |             |   |
| C          | 4.25335300  | 1.52687500  |   |
| 0.05745300 |             |             |   |
| C          | -2.32518900 | 3.28216100  | - |
| 0.96602200 |             |             |   |
| C          | -2.99760900 | -2.68620200 | - |
| 0.59630600 |             |             |   |
| C          | 3.55408400  | 2.67550100  |   |
| 0.25263000 |             |             |   |
| C          | -1.19825500 | 3.95592400  | - |
| 0.60820100 |             |             |   |
| C          | -2.67062700 | -0.47912900 | - |
| 0.88644900 |             |             |   |
| C          | 3.28782900  | 0.49370600  | - |
| 0.23565100 |             |             |   |
| C          | -2.01226000 | 1.87920500  | - |
| 0.91421200 |             |             |   |
| C          | -1.60115400 | -2.34838000 | - |
| 0.47372800 |             |             |   |
| C          | 2.16239400  | 2.35638500  |   |
| 0.03776200 |             |             |   |
| C          | -0.17588000 | 2.97202100  | - |
| 0.36635200 |             |             |   |
| H          | -3.39969900 | -3.68491200 | - |
| 0.50786700 |             |             |   |
| H          | 3.93541800  | 3.65484400  |   |
| 0.50138500 |             |             |   |
| H          | -1.05454800 | 5.02381000  | - |
| 0.53436100 |             |             |   |
| H          | -4.71602700 | -1.38562800 | - |
| 1.03636100 |             |             |   |
| H          | 5.32097100  | 1.37545800  |   |
| 0.11998200 |             |             |   |
| H          | -3.28898700 | 3.68874700  | - |
| 1.23472600 |             |             |   |
| N          | 0.10789700  | -0.06163300 |   |
| 1.46232500 |             |             |   |

|            |             |             |   |
|------------|-------------|-------------|---|
| C          | -1.14563900 | -0.11541200 |   |
| 2.06813700 |             |             |   |
| C          | -1.87912500 | 1.07054300  |   |
| 2.29508500 |             |             |   |
| C          | -2.72448500 | -1.37754400 |   |
| 3.15249600 |             |             |   |
| C          | -3.07655100 | 0.98206600  |   |
| 2.99256400 |             |             |   |
| H          | -1.50273600 | 2.01493800  |   |
| 1.92029200 |             |             |   |
| C          | -3.52540300 | -0.26828800 |   |
| 3.42746900 |             |             |   |
| H          | -3.03750400 | -2.37149800 |   |
| 3.46983400 |             |             |   |
| H          | -3.66021900 | 1.87925800  |   |
| 3.18473400 |             |             |   |
| H          | -4.46246400 | -0.38219700 |   |
| 3.96293800 |             |             |   |
| N          | -1.55508900 | -1.32324800 |   |
| 2.50748700 |             |             |   |
| C          | 5.06927000  | -1.21153300 | - |
| 0.48719300 |             |             |   |
| C          | 5.86222500  | -0.81772800 | - |
| 1.57528300 |             |             |   |
| C          | 5.66594700  | -1.93095400 |   |
| 0.55932600 |             |             |   |
| C          | 7.21904200  | -1.14206200 | - |
| 1.62024100 |             |             |   |
| H          | 5.40580600  | -0.25620300 | - |
| 2.38576300 |             |             |   |
| C          | 7.02267200  | -2.25476800 |   |
| 0.51501700 |             |             |   |
| H          | 5.05763900  | -2.22968100 |   |
| 1.40828700 |             |             |   |
| C          | 7.80264300  | -1.86209900 | - |
| 0.57538500 |             |             |   |
| H          | 7.81904700  | -0.83379700 | - |
| 2.47234900 |             |             |   |
| H          | 7.47111200  | -2.80922000 |   |
| 1.33510700 |             |             |   |
| H          | 8.85915000  | -2.11416800 | - |
| 0.60960300 |             |             |   |
| C          | 1.44125500  | 4.72520200  |   |
| 0.31356600 |             |             |   |

|            |             |             |   |
|------------|-------------|-------------|---|
| C          | 0.91599500  | 5.32735000  |   |
| 1.46685900 |             |             |   |
| C          | 2.24431900  | 5.49304700  | - |
| 0.54319800 |             |             |   |
| C          | 1.19190700  | 6.66344800  |   |
| 1.76018800 |             |             |   |
| H          | 0.29320900  | 4.73708900  |   |
| 2.13333500 |             |             |   |
| C          | 2.51994200  | 6.82959300  | - |
| 0.25087900 |             |             |   |
| H          | 2.64701900  | 5.03402000  | - |
| 1.44168600 |             |             |   |
| C          | 1.99505700  | 7.41819500  |   |
| 0.90202400 |             |             |   |
| H          | 0.78209100  | 7.11352700  |   |
| 2.66048600 |             |             |   |
| H          | 3.14067000  | 7.41201200  | - |
| 0.92657800 |             |             |   |
| H          | 2.20984400  | 8.45879700  |   |
| 1.12974100 |             |             |   |
| C          | -4.38826900 | 1.25541000  | - |
| 1.31430400 |             |             |   |
| C          | -4.98052600 | 1.01378400  | - |
| 2.56165900 |             |             |   |
| C          | -5.15730600 | 1.84428500  | - |
| 0.29953300 |             |             |   |
| C          | -6.31289900 | 1.36106400  | - |
| 2.79281600 |             |             |   |
| H          | -4.38894200 | 0.55317800  | - |
| 3.34800800 |             |             |   |
| C          | -6.48911500 | 2.19064700  | - |
| 0.53006400 |             |             |   |
| H          | -4.70149100 | 2.01603100  |   |
| 0.67130900 |             |             |   |
| C          | -7.06981000 | 1.95115600  | - |
| 1.77810200 |             |             |   |
| H          | -6.75840700 | 1.17195000  | - |
| 3.76585500 |             |             |   |
| H          | -7.07487100 | 2.64283400  |   |
| 0.26601200 |             |             |   |
| H          | -8.10703400 | 2.22086600  | - |
| 1.95796900 |             |             |   |
| C          | -0.98461700 | -4.69350300 |   |
| 0.01251600 |             |             |   |

|            |             |             |   |
|------------|-------------|-------------|---|
| C          | -1.46891500 | -4.98017000 |   |
| 1.29808200 |             |             |   |
| C          | -0.90196700 | -5.72281300 | - |
| 0.93440500 |             |             |   |
| C          | -1.85919200 | -6.27825600 |   |
| 1.62918800 |             |             |   |
| H          | -1.52180100 | -4.17290700 |   |
| 2.02399400 |             |             |   |
| C          | -1.29355400 | -7.02116300 | - |
| 0.60091000 |             |             |   |
| H          | -0.53463400 | -5.49894800 | - |
| 1.93231400 |             |             |   |
| C          | -1.77260800 | -7.30119500 |   |
| 0.68094300 |             |             |   |
| H          | -2.22865400 | -6.49208100 |   |
| 2.62878300 |             |             |   |
| H          | -1.22843100 | -7.81191000 | - |
| 1.34369200 |             |             |   |
| H          | -2.07746600 | -8.31182400 |   |
| 0.93944900 |             |             |   |

**ossINT9**

|            |             |             |   |
|------------|-------------|-------------|---|
| Fe         | 0.28114700  | -0.00522300 | - |
| 0.26509100 |             |             |   |
| N          | 2.05523000  | 0.94143500  | - |
| 0.29491500 |             |             |   |
| C          | -0.69415200 | -3.26086100 | - |
| 0.31491000 |             |             |   |
| C          | 3.60261300  | -0.98705000 | - |
| 0.42495600 |             |             |   |
| C          | 2.88798200  | -3.39053500 | - |
| 0.43596400 |             |             |   |
| C          | 1.69060600  | -4.02275000 | - |
| 0.31766200 |             |             |   |
| C          | 2.61454300  | -1.97333600 | - |
| 0.45598700 |             |             |   |
| C          | 0.67501900  | -2.99990000 | - |
| 0.33342800 |             |             |   |
| H          | 1.49743000  | -5.08358600 | - |
| 0.25328500 |             |             |   |
| H          | 3.87209000  | -3.83193400 | - |
| 0.48799900 |             |             |   |
| N          | -0.63551600 | 1.75100700  | - |
| 0.53159600 |             |             |   |

|            |             |             |   |
|------------|-------------|-------------|---|
| N          | 1.25332800  | -1.75203500 | - |
| 0.42715600 |             |             |   |
| N          | -1.42545400 | -0.93363100 | - |
| 0.71400000 |             |             |   |
| C          | 1.25700300  | 3.26155100  | - |
| 0.00446100 |             |             |   |
| C          | -2.93517200 | 0.99790900  | - |
| 1.03613700 |             |             |   |
| C          | -3.68246700 | -1.38742100 | - |
| 0.96410400 |             |             |   |
| C          | 4.31507700  | 1.37906200  | - |
| 0.04380700 |             |             |   |
| C          | -2.23795100 | 3.39367200  | - |
| 0.82568400 |             |             |   |
| C          | -3.06181100 | -2.56966800 | - |
| 0.70632900 |             |             |   |
| C          | 3.65830100  | 2.55482400  |   |
| 0.14090600 |             |             |   |
| C          | -1.08085100 | 4.02088400  | - |
| 0.48004900 |             |             |   |
| C          | -2.66540800 | -0.36701700 | - |
| 0.94290200 |             |             |   |
| C          | 3.31289100  | 0.37390000  | - |
| 0.29649900 |             |             |   |
| C          | -1.96424800 | 1.98007200  | - |
| 0.82895300 |             |             |   |
| C          | -1.65957300 | -2.28244800 | - |
| 0.55113500 |             |             |   |
| C          | 2.25350000  | 2.28346100  | - |
| 0.03904400 |             |             |   |
| C          | -0.08365300 | 2.99564900  | - |
| 0.29956200 |             |             |   |
| H          | -3.49947900 | -3.55460200 | - |
| 0.63393400 |             |             |   |
| H          | 4.07844600  | 3.52197600  |   |
| 0.37397800 |             |             |   |
| H          | -0.89997500 | 5.08141600  | - |
| 0.38449800 |             |             |   |
| H          | -4.73355800 | -1.20677200 | - |
| 1.13438100 |             |             |   |
| H          | 5.37725400  | 1.19231700  |   |
| 0.01358500 |             |             |   |
| H          | -3.19342400 | 3.83851200  | - |
| 1.06159600 |             |             |   |



|            |             |             |   |
|------------|-------------|-------------|---|
| N          | 0.09819100  | -0.08983800 |   |
| 1.53516700 |             |             |   |
| C          | -1.17057700 | -0.10435500 |   |
| 2.09009600 |             |             |   |
| C          | -1.83862400 | 1.11353300  |   |
| 2.35804100 |             |             |   |
| C          | -2.88787500 | -1.32011800 |   |
| 3.00782400 |             |             |   |
| C          | -3.07790700 | 1.06407800  |   |
| 2.98065600 |             |             |   |
| H          | -1.38102500 | 2.05128300  |   |
| 2.06480300 |             |             |   |
| C          | -3.63030300 | -0.17767000 |   |
| 3.31028100 |             |             |   |
| H          | -3.28155900 | -2.30778800 |   |
| 3.24504900 |             |             |   |
| H          | -3.61246100 | 1.98530400  |   |
| 3.19996700 |             |             |   |
| H          | -4.60219600 | -0.26002700 |   |
| 3.78610300 |             |             |   |
| N          | -1.68555900 | -1.30699900 |   |
| 2.42517300 |             |             |   |
| C          | 5.03850200  | -1.40033500 | - |
| 0.45714500 |             |             |   |
| C          | 5.84054900  | -1.08252200 | - |
| 1.56345000 |             |             |   |
| C          | 5.61409300  | -2.09412600 |   |
| 0.61819700 |             |             |   |
| C          | 7.18504200  | -1.45551700 | - |
| 1.59741400 |             |             |   |
| H          | 5.40065100  | -0.54171400 | - |
| 2.39683400 |             |             |   |
| C          | 6.95850800  | -2.46684900 |   |
| 0.58469000 |             |             |   |
| H          | 4.99934600  | -2.33396600 |   |
| 1.48108000 |             |             |   |
| C          | 7.74743400  | -2.14941100 | - |
| 0.52359100 |             |             |   |
| H          | 7.79194500  | -1.20595000 | - |
| 2.46373200 |             |             |   |
| H          | 7.39057100  | -3.00042100 |   |
| 1.42711900 |             |             |   |
| H          | 8.79437600  | -2.43950100 | - |
| 0.54936400 |             |             |   |

|            |             |            |   |
|------------|-------------|------------|---|
| C          | 1.63853100  | 4.67365200 |   |
| 0.30053400 |             |            |   |
| C          | 1.19776800  | 5.28261100 |   |
| 1.48523600 |             |            |   |
| C          | 2.42444400  | 5.42032700 | - |
| 0.59033400 |             |            |   |
| C          | 1.53926400  | 6.60416900 |   |
| 1.77555300 |             |            |   |
| H          | 0.58871600  | 4.70895500 |   |
| 2.17835500 |             |            |   |
| C          | 2.76584500  | 6.74217900 | - |
| 0.30091700 |             |            |   |
| H          | 2.76175000  | 4.95644200 | - |
| 1.51295400 |             |            |   |
| C          | 2.32472400  | 7.33755100 |   |
| 0.88322900 |             |            |   |
| H          | 1.19448800  | 7.05937600 |   |
| 2.70020500 |             |            |   |
| H          | 3.37215100  | 7.30818000 | - |
| 1.00314600 |             |            |   |
| H          | 2.59068300  | 8.36676600 |   |
| 1.10865500 |             |            |   |
| C          | -4.34654100 | 1.42372900 | - |
| 1.27985400 |             |            |   |
| C          | -4.94341000 | 1.23767600 | - |
| 2.53482400 |             |            |   |
| C          | -5.10181400 | 2.00029400 | - |
| 0.24766800 |             |            |   |
| C          | -6.26588000 | 1.62646200 | - |
| 2.75574300 |             |            |   |
| H          | -4.36270500 | 0.78760400 | - |
| 3.33526800 |             |            |   |
| C          | -6.42376300 | 2.38843500 | - |
| 0.46817100 |             |            |   |
| H          | -4.64350400 | 2.12884800 |   |
| 0.72848700 |             |            |   |
| C          | -7.00883100 | 2.20369000 | - |
| 1.72339600 |             |            |   |
| H          | -6.71446200 | 1.48030500 | - |
| 3.73475700 |             |            |   |
| H          | -6.99869400 | 2.83024000 |   |
| 0.34152800 |             |            |   |
| H          | -8.03839700 | 2.50592300 | - |
| 1.89535600 |             |            |   |

|            |             |             |   |
|------------|-------------|-------------|---|
| C          | -1.16434300 | -4.64454100 | - |
| 0.00449900 |             |             |   |
| C          | -1.67981500 | -4.90464400 |   |
| 1.27443700 |             |             |   |
| C          | -1.11342400 | -5.67889200 | - |
| 0.94770400 |             |             |   |
| C          | -2.13422900 | -6.18258700 |   |
| 1.60217500 |             |             |   |
| H          | -1.70545300 | -4.09317800 |   |
| 1.99710100 |             |             |   |
| C          | -1.56950200 | -6.95709500 | - |
| 0.61754800 |             |             |   |
| H          | -0.71929000 | -5.47520100 | - |
| 1.93971500 |             |             |   |
| C          | -2.08061600 | -7.21099500 |   |
| 0.65729100 |             |             |   |
| H          | -2.52811000 | -6.37665600 |   |
| 2.59648800 |             |             |   |
| H          | -1.52844600 | -7.75245000 | - |
| 1.35713500 |             |             |   |
| H          | -2.43551500 | -8.20584200 |   |
| 0.91322500 |             |             |   |

### **<sup>3</sup>INT9**

|            |             |             |   |
|------------|-------------|-------------|---|
| Fe         | 0.26480100  | 0.01486200  | - |
| 0.24158600 |             |             |   |
| N          | 2.22522400  | 0.47854400  | - |
| 0.30553000 |             |             |   |
| C          | -1.51762100 | -2.88593400 | - |
| 0.49783100 |             |             |   |
| C          | 3.21585200  | -1.79173000 | - |
| 0.40422800 |             |             |   |
| C          | 1.90997200  | -3.92541900 | - |
| 0.56061900 |             |             |   |
| C          | 0.58736900  | -4.23099300 | - |
| 0.52533400 |             |             |   |
| C          | 2.00886700  | -2.48597100 | - |
| 0.48740000 |             |             |   |
| C          | -0.12712000 | -2.97919900 | - |
| 0.47549700 |             |             |   |
| H          | 0.12153900  | -5.20489700 | - |
| 0.56412000 |             |             |   |
| H          | 2.74978500  | -4.60058200 | - |
| 0.63000200 |             |             |   |

|            |             |             |   |
|------------|-------------|-------------|---|
| N          | -0.16163200 | 1.97337800  | - |
| 0.44855500 |             |             |   |
| N          | 0.75074000  | -1.92126300 | - |
| 0.46937000 |             |             |   |
| N          | -1.61045800 | -0.42679300 | - |
| 0.76408100 |             |             |   |
| C          | 2.07602300  | 2.93222900  | - |
| 0.01196500 |             |             |   |
| C          | -2.58696200 | 1.85128600  | - |
| 0.88984800 |             |             |   |
| C          | -3.91685900 | -0.25616700 | - |
| 0.91242800 |             |             |   |
| C          | 4.51603500  | 0.30171000  | - |
| 0.00390100 |             |             |   |
| C          | -1.29042600 | 3.98381700  | - |
| 0.67248800 |             |             |   |
| C          | -3.62367000 | -1.57509400 | - |
| 0.76052000 |             |             |   |
| C          | 4.19460700  | 1.61351400  |   |
| 0.14869100 |             |             |   |
| C          | 0.00465300  | 4.28338700  | - |
| 0.39013700 |             |             |   |
| C          | -2.66868400 | 0.45920200  | - |
| 0.88883700 |             |             |   |
| C          | 3.28860600  | -0.40258300 | - |
| 0.27274500 |             |             |   |
| C          | -1.39279500 | 2.54508000  | - |
| 0.68801500 |             |             |   |
| C          | -2.19314300 | -1.68092000 | - |
| 0.67337400 |             |             |   |
| C          | 2.77287000  | 1.72303600  | - |
| 0.05375400 |             |             |   |
| C          | 0.70425700  | 3.02947600  | - |
| 0.25021000 |             |             |   |
| H          | -4.30841000 | -2.40801900 | - |
| 0.70307700 |             |             |   |
| H          | 4.85288900  | 2.43701600  |   |
| 0.38207000 |             |             |   |
| H          | 0.46287300  | 5.25824300  | - |
| 0.31242800 |             |             |   |
| H          | -4.88969800 | 0.20429100  | - |
| 0.99956200 |             |             |   |
| H          | 5.48794700  | -0.16073500 |   |
| 0.08382100 |             |             |   |

|            |             |             |   |
|------------|-------------|-------------|---|
| H          | -2.10639700 | 4.66393800  | - |
| 0.86753000 |             |             |   |
| N          | 0.01444500  | -0.04246500 |   |
| 1.47446600 |             |             |   |
| C          | -1.20243300 | -0.16329800 |   |
| 2.10700800 |             |             |   |
| C          | -1.92937500 | 1.00491600  |   |
| 2.44090400 |             |             |   |
| C          | -2.81872600 | -1.50173100 |   |
| 3.04219400 |             |             |   |
| C          | -3.14738300 | 0.87050300  |   |
| 3.09210400 |             |             |   |
| H          | -1.52523800 | 1.97198100  |   |
| 2.16309600 |             |             |   |
| C          | -3.61380000 | -0.41103400 |   |
| 3.40065500 |             |             |   |
| H          | -3.15109600 | -2.51605000 |   |
| 3.26031500 |             |             |   |
| H          | -3.73166400 | 1.75051700  |   |
| 3.34967800 |             |             |   |
| H          | -4.56388200 | -0.56370000 |   |
| 3.90299500 |             |             |   |
| N          | -1.64277300 | -1.40413300 |   |
| 2.41591500 |             |             |   |
| C          | 4.49247800  | -2.56833400 | - |
| 0.40587000 |             |             |   |
| C          | 5.39370900  | -2.45010200 | - |
| 1.47468200 |             |             |   |
| C          | 4.81762600  | -3.41901300 |   |
| 0.66169900 |             |             |   |
| C          | 6.58964700  | -3.16936300 | - |
| 1.47896000 |             |             |   |
| H          | 5.14758600  | -1.79086000 | - |
| 2.30247100 |             |             |   |
| C          | 6.01401500  | -4.13737000 |   |
| 0.65821400 |             |             |   |
| H          | 4.12595100  | -3.50830300 |   |
| 1.49450400 |             |             |   |
| C          | 6.90288800  | -4.01526700 | - |
| 0.41247700 |             |             |   |
| H          | 7.27490200  | -3.07079200 | - |
| 2.31670700 |             |             |   |
| H          | 6.25347900  | -4.78875600 |   |
| 1.49452400 |             |             |   |

|            |             |             |   |
|------------|-------------|-------------|---|
| H          | 7.83438600  | -4.57492200 | - |
| 0.41511300 |             |             |   |
| C          | 2.83314200  | 4.19135200  |   |
| 0.25987100 |             |             |   |
| C          | 2.60607500  | 4.91214200  |   |
| 1.44205800 |             |             |   |
| C          | 3.77107300  | 4.68231700  | - |
| 0.66107400 |             |             |   |
| C          | 3.30352000  | 6.09311900  |   |
| 1.69965800 |             |             |   |
| H          | 1.88075300  | 4.53579200  |   |
| 2.15790500 |             |             |   |
| C          | 4.46790000  | 5.86384700  | - |
| 0.40444800 |             |             |   |
| H          | 3.94655200  | 4.13110900  | - |
| 1.58063700 |             |             |   |
| C          | 4.23648300  | 6.57220500  |   |
| 0.77707700 |             |             |   |
| H          | 3.12027400  | 6.63681700  |   |
| 2.62263600 |             |             |   |
| H          | 5.18810100  | 6.23308300  | - |
| 1.12976200 |             |             |   |
| H          | 4.77940100  | 7.49202700  |   |
| 0.97718400 |             |             |   |
| C          | -3.84915200 | 2.63414200  | - |
| 1.05091200 |             |             |   |
| C          | -4.53450900 | 2.64565900  | - |
| 2.27444800 |             |             |   |
| C          | -4.37630400 | 3.36206700  |   |
| 0.02655900 |             |             |   |
| C          | -5.71772800 | 3.37194700  | - |
| 2.41887900 |             |             |   |
| H          | -4.13117200 | 2.08177600  | - |
| 3.11092600 |             |             |   |
| C          | -5.55919400 | 4.08797000  | - |
| 0.11684200 |             |             |   |
| H          | -3.85161700 | 3.34729600  |   |
| 0.97758400 |             |             |   |
| C          | -6.23284800 | 4.09533400  | - |
| 1.34074000 |             |             |   |
| H          | -6.23513100 | 3.37489900  | - |
| 3.37456200 |             |             |   |
| H          | -5.95703900 | 4.64396500  |   |
| 0.72803300 |             |             |   |

|            |             |             |   |
|------------|-------------|-------------|---|
| H          | -7.15411300 | 4.66055600  | - |
| 1.45317000 |             |             |   |
| C          | -2.30736300 | -4.13294900 | - |
| 0.27683600 |             |             |   |
| C          | -2.31209200 | -4.70872300 |   |
| 1.00341100 |             |             |   |
| C          | -3.04158100 | -4.74175900 | - |
| 1.30334900 |             |             |   |
| C          | -3.04267000 | -5.87156600 |   |
| 1.25001300 |             |             |   |
| H          | -1.74568500 | -4.22227200 |   |
| 1.79266200 |             |             |   |
| C          | -3.77115600 | -5.90631900 | - |
| 1.05489500 |             |             |   |
| H          | -3.03420600 | -4.29933500 | - |
| 2.29578800 |             |             |   |
| C          | -3.77355300 | -6.47306300 |   |
| 0.22176100 |             |             |   |
| H          | -3.04277800 | -6.30753600 |   |
| 2.24568500 |             |             |   |
| H          | -4.33362500 | -6.37248500 | - |
| 1.85959900 |             |             |   |
| H          | -4.34145500 | -7.37949800 |   |
| 0.41408800 |             |             |   |

**<sup>5</sup>INT9**

|            |             |             |   |
|------------|-------------|-------------|---|
| Fe         | 0.28316100  | -0.00415500 | - |
| 0.01372500 |             |             |   |
| N          | 2.36223600  | 0.12808600  | - |
| 0.21455800 |             |             |   |
| C          | -2.21651200 | 2.31970100  | - |
| 0.75465200 |             |             |   |
| C          | 2.61639900  | 2.59422500  | - |
| 0.10098900 |             |             |   |
| C          | 0.79033900  | 4.30060000  | - |
| 0.46995100 |             |             |   |
| C          | -0.55671900 | 4.22539300  | - |
| 0.65273200 |             |             |   |
| C          | 1.27107800  | 2.94555000  | - |
| 0.30600400 |             |             |   |
| C          | -0.91085300 | 2.82312500  | - |
| 0.60512300 |             |             |   |
| H          | -1.24707500 | 5.03680900  | - |
| 0.83172600 |             |             |   |

|            |             |             |   |
|------------|-------------|-------------|---|
| H          | 1.40957400  | 5.18565200  | - |
| 0.46797500 |             |             |   |
| N          | 0.47186000  | -2.03977600 | - |
| 0.49252900 |             |             |   |
| N          | 0.21793400  | 2.06759300  | - |
| 0.40902900 |             |             |   |
| N          | -1.65911100 | -0.09988900 | - |
| 0.80870500 |             |             |   |
| C          | 2.91705900  | -2.29231600 | - |
| 0.25211800 |             |             |   |
| C          | -1.93077200 | -2.56427400 | - |
| 0.69875100 |             |             |   |
| C          | -3.82101100 | -0.90946100 | - |
| 0.81784600 |             |             |   |
| C          | 4.49114300  | 0.92908700  |   |
| 0.17072000 |             |             |   |
| C          | -0.07085100 | -4.27151500 | - |
| 0.68255100 |             |             |   |
| C          | -3.90077500 | 0.44899000  | - |
| 0.84283000 |             |             |   |
| C          | 4.57537200  | -0.42942700 |   |
| 0.11877600 |             |             |   |
| C          | 1.28435400  | -4.19602400 | - |
| 0.58459600 |             |             |   |
| C          | -2.41912400 | -1.25274500 | - |
| 0.79062300 |             |             |   |
| C          | 3.10742400  | 1.27662800  | - |
| 0.05245600 |             |             |   |
| C          | -0.57281000 | -2.91574900 | - |
| 0.61969800 |             |             |   |
| C          | -2.54759000 | 0.95555100  | - |
| 0.82439400 |             |             |   |
| C          | 3.24336900  | -0.92799400 | - |
| 0.13135800 |             |             |   |
| C          | 1.61895400  | -2.79402900 | - |
| 0.43808000 |             |             |   |
| H          | -4.79296400 | 1.05742900  | - |
| 0.84588800 |             |             |   |
| H          | 5.45551000  | -1.04170400 |   |
| 0.24899900 |             |             |   |
| H          | 1.99744600  | -5.00671100 | - |
| 0.61531300 |             |             |   |
| H          | -4.63464100 | -1.61944000 | - |
| 0.79962600 |             |             |   |



|            |             |             |   |
|------------|-------------|-------------|---|
| H          | 5.28979400  | 1.63337000  |   |
| 0.35111800 |             |             |   |
| H          | -0.68082900 | -5.15404600 | - |
| 0.81108700 |             |             |   |
| C          | -2.14806100 | 1.10635200  |   |
| 2.50138900 |             |             |   |
| C          | -1.47968600 | -0.12070800 |   |
| 2.21387200 |             |             |   |
| C          | -3.31962700 | -1.32599000 |   |
| 2.90209100 |             |             |   |
| C          | -4.05209700 | -0.16409100 |   |
| 3.20062800 |             |             |   |
| C          | -3.44386300 | 1.07639100  |   |
| 2.99508300 |             |             |   |
| H          | -1.62462300 | 2.03429500  |   |
| 2.29989300 |             |             |   |
| H          | -3.77801600 | -2.30429600 |   |
| 3.04412400 |             |             |   |
| H          | -5.06744100 | -0.24143700 |   |
| 3.57697000 |             |             |   |
| H          | -3.97833500 | 2.00015400  |   |
| 3.20019200 |             |             |   |
| N          | -0.23161900 | -0.09412100 |   |
| 1.70786600 |             |             |   |
| N          | -2.07988600 | -1.33309900 |   |
| 2.42841500 |             |             |   |
| C          | 3.60037900  | 3.70897900  |   |
| 0.05370200 |             |             |   |
| C          | 4.59502200  | 3.92876300  | - |
| 0.91182600 |             |             |   |
| C          | 3.54093100  | 4.56185800  |   |
| 1.16665800 |             |             |   |
| C          | 5.50795500  | 4.97416400  | - |
| 0.76753700 |             |             |   |
| H          | 4.64330400  | 3.27460300  | - |
| 1.77774400 |             |             |   |
| C          | 4.45491900  | 5.60622000  |   |
| 1.31239500 |             |             |   |
| H          | 2.77397600  | 4.39554300  |   |
| 1.91778300 |             |             |   |
| C          | 5.44098000  | 5.81559700  |   |
| 0.34548000 |             |             |   |
| H          | 6.26878200  | 5.13363800  | - |
| 1.52702700 |             |             |   |

|            |             |             |   |
|------------|-------------|-------------|---|
| H          | 4.39857800  | 6.25387200  |   |
| 2.18331000 |             |             |   |
| H          | 6.15238600  | 6.62926100  |   |
| 0.45834800 |             |             |   |
| C          | 4.03503900  | -3.28137300 | - |
| 0.16903900 |             |             |   |
| C          | 4.11617000  | -4.17785100 |   |
| 0.90770600 |             |             |   |
| C          | 5.02159100  | -3.33234900 | - |
| 1.16579800 |             |             |   |
| C          | 5.15872800  | -5.10216000 |   |
| 0.98582500 |             |             |   |
| H          | 3.35663600  | -4.14029600 |   |
| 1.68337200 |             |             |   |
| C          | 6.06323000  | -4.25775200 | - |
| 1.08875200 |             |             |   |
| H          | 4.96247000  | -2.64208500 | - |
| 2.00261200 |             |             |   |
| C          | 6.13492300  | -5.14514900 | - |
| 0.01235700 |             |             |   |
| H          | 5.20994200  | -5.78607300 |   |
| 1.82887500 |             |             |   |
| H          | 6.81633800  | -4.28773800 | - |
| 1.87174700 |             |             |   |
| H          | 6.94638400  | -5.86542200 |   |
| 0.04817900 |             |             |   |
| C          | -2.92701200 | -3.67333500 | - |
| 0.60499500 |             |             |   |
| C          | -3.72877600 | -4.04205600 | - |
| 1.69382800 |             |             |   |
| C          | -3.07029900 | -4.35865900 |   |
| 0.61214400 |             |             |   |
| C          | -4.65696600 | -5.07796700 | - |
| 1.57007500 |             |             |   |
| H          | -3.61736300 | -3.51407300 | - |
| 2.63690900 |             |             |   |
| C          | -3.99969900 | -5.39207000 |   |
| 0.73479400 |             |             |   |
| H          | -2.45292500 | -4.05661100 |   |
| 1.45354900 |             |             |   |
| C          | -4.79467400 | -5.75479200 | - |
| 0.35598800 |             |             |   |
| H          | -5.26925700 | -5.35829300 | - |
| 2.42317200 |             |             |   |

|            |             |             |   |
|------------|-------------|-------------|---|
| H          | -4.10470100 | -5.91336300 |   |
| 1.68283200 |             |             |   |
| H          | -5.51730100 | -6.56092200 | - |
| 0.26055000 |             |             |   |
| C          | -3.33393800 | 3.30879200  | - |
| 0.81877500 |             |             |   |
| C          | -3.61225100 | 4.13917400  |   |
| 0.27862200 |             |             |   |
| C          | -4.12965700 | 3.42594400  | - |
| 1.96890800 |             |             |   |
| C          | -4.65900300 | 5.06013400  |   |
| 0.22922300 |             |             |   |
| H          | -2.99941100 | 4.05406600  |   |
| 1.17157400 |             |             |   |
| C          | -5.17617600 | 4.34767500  | - |
| 2.01996500 |             |             |   |
| H          | -3.91775600 | 2.78922600  | - |
| 2.82309000 |             |             |   |
| C          | -5.44473500 | 5.16691600  | - |
| 0.92090300 |             |             |   |
| H          | -4.86263700 | 5.69214400  |   |
| 1.08968200 |             |             |   |
| H          | -5.77894800 | 4.42868500  | - |
| 2.92060700 |             |             |   |
| H          | -6.25988700 | 5.88437000  | - |
| 0.96076600 |             |             |   |

**CSS**TS9

|            |             |             |  |
|------------|-------------|-------------|--|
| Fe         | -0.70976100 | 0.09717600  |  |
| 0.60664700 |             |             |  |
| N          | -2.70007000 | -0.20149000 |  |
| 0.42059100 |             |             |  |
| C          | 1.91363400  | -1.87616400 |  |
| 1.40248200 |             |             |  |
| C          | -2.86324900 | -2.59762300 |  |
| 0.96985300 |             |             |  |
| C          | -0.94417200 | -3.98760700 |  |
| 1.79119700 |             |             |  |
| C          | 0.39843400  | -3.78467900 |  |
| 1.89495800 |             |             |  |
| C          | -1.52175700 | -2.74710200 |  |
| 1.33174800 |             |             |  |
| C          | 0.64433500  | -2.42003800 |  |
| 1.51742900 |             |             |  |

|            |             |             |   |
|------------|-------------|-------------|---|
| H          | 2.75601500  | -2.54040600 |   |
| 1.55741700 |             |             |   |
| H          | 1.16520600  | -4.48411600 |   |
| 2.20376600 |             |             |   |
| H          | -1.50195400 | -4.88908600 |   |
| 1.99748500 |             |             |   |
| N          | -1.01330500 | 2.06708000  |   |
| 0.63719100 |             |             |   |
| N          | -0.53956900 | -1.77804600 |   |
| 1.22274900 |             |             |   |
| N          | 1.21817600  | 0.43325900  |   |
| 1.08109100 |             |             |   |
| C          | -3.36654300 | 2.09907200  | - |
| 0.15678600 |             |             |   |
| C          | 1.30046900  | 2.88638200  |   |
| 1.03041800 |             |             |   |
| C          | 3.32237300  | 1.39073700  |   |
| 1.15120800 |             |             |   |
| C          | -4.75073300 | -1.21015100 |   |
| 0.04900900 |             |             |   |
| C          | -0.65962200 | 4.35336900  |   |
| 0.54619200 |             |             |   |
| C          | 3.51147300  | 0.03798100  |   |
| 1.12295900 |             |             |   |
| C          | -4.88182300 | 0.10003100  | - |
| 0.29076900 |             |             |   |
| C          | -1.94644400 | 4.13411700  |   |
| 0.16671000 |             |             |   |
| C          | 1.90010300  | 1.62708100  |   |
| 1.09652500 |             |             |   |
| C          | -3.39159900 | -1.38904100 |   |
| 0.50540500 |             |             |   |
| C          | -0.06954400 | 3.06464400  |   |
| 0.80848400 |             |             |   |
| C          | 2.17909500  | -0.54342100 |   |
| 1.15086600 |             |             |   |
| C          | -3.60293000 | 0.72514600  | - |
| 0.04366400 |             |             |   |
| C          | -2.16786200 | 2.71049800  |   |
| 0.22034600 |             |             |   |
| H          | -5.76289100 | 0.61034400  | - |
| 0.65157700 |             |             |   |
| H          | -2.68312800 | 4.86406000  | - |
| 0.13452400 |             |             |   |

|            |             |             |   |
|------------|-------------|-------------|---|
| H          | 4.08307700  | 2.15725700  |   |
| 1.14156000 |             |             |   |
| H          | -5.49956400 | -1.98755900 |   |
| 0.00854700 |             |             |   |
| H          | -0.13700300 | 5.29616100  |   |
| 0.61175500 |             |             |   |
| N          | -0.45127400 | -0.06133900 | - |
| 1.11396000 |             |             |   |
| C          | 0.64164100  | 0.57740200  | - |
| 1.70938300 |             |             |   |
| C          | 0.40099400  | 1.88522800  | - |
| 2.19762500 |             |             |   |
| C          | 2.81462600  | 0.64655400  | - |
| 2.46602200 |             |             |   |
| C          | 1.44021900  | 2.56893800  | - |
| 2.81060600 |             |             |   |
| H          | -0.57823500 | 2.33125000  | - |
| 2.07025300 |             |             |   |
| C          | 2.68490100  | 1.94396400  | - |
| 2.95568200 |             |             |   |
| H          | 3.75616100  | 0.10593200  | - |
| 2.55711200 |             |             |   |
| H          | 1.27976900  | 3.57993300  | - |
| 3.17600000 |             |             |   |
| H          | 3.52162000  | 2.44329900  | - |
| 3.43423800 |             |             |   |
| N          | 1.83462200  | -0.02462400 | - |
| 1.85050300 |             |             |   |
| C          | 3.29925500  | -4.80865800 | - |
| 1.40344800 |             |             |   |
| C          | 4.15674700  | -4.44171100 | - |
| 2.44497200 |             |             |   |
| C          | 3.77529700  | -3.43246700 | - |
| 3.33746600 |             |             |   |
| C          | 2.54870200  | -2.79424800 | - |
| 3.19389700 |             |             |   |
| C          | 1.67550600  | -3.15417600 | - |
| 2.14261400 |             |             |   |
| C          | 2.06766900  | -4.17747400 | - |
| 1.25141700 |             |             |   |
| H          | 3.59238900  | -5.58931000 | - |
| 0.70678800 |             |             |   |
| H          | 5.11564500  | -4.93919000 | - |
| 2.56303300 |             |             |   |

|            |             |             |   |
|------------|-------------|-------------|---|
| H          | 4.44137200  | -3.14153900 | - |
| 4.14516700 |             |             |   |
| H          | 2.25571400  | -1.99692300 | - |
| 3.86728800 |             |             |   |
| H          | 1.39564300  | -4.45705200 | - |
| 0.44789800 |             |             |   |
| C          | 0.42058900  | -2.52265700 | - |
| 1.98854200 |             |             |   |
| C          | -0.64890900 | -1.92660200 | - |
| 1.81635500 |             |             |   |
| H          | -1.71759800 | -1.90132900 | - |
| 1.82250100 |             |             |   |
| C          | -3.76100700 | -3.78906500 |   |
| 1.03711100 |             |             |   |
| C          | -4.84109100 | -3.82580000 |   |
| 1.93199900 |             |             |   |
| C          | -3.54435200 | -4.89118900 |   |
| 0.19505600 |             |             |   |
| C          | -5.68245200 | -4.93801300 |   |
| 1.98568700 |             |             |   |
| H          | -5.01354400 | -2.97553300 |   |
| 2.58583700 |             |             |   |
| C          | -4.38565100 | -6.00309100 |   |
| 0.24787100 |             |             |   |
| H          | -2.71078100 | -4.86526800 | - |
| 0.50149100 |             |             |   |
| C          | -5.45714800 | -6.02968000 |   |
| 1.14385100 |             |             |   |
| H          | -6.51180400 | -4.95283800 |   |
| 2.68789000 |             |             |   |
| H          | -4.20671200 | -6.84639600 | - |
| 0.41395000 |             |             |   |
| H          | -6.11262300 | -6.89544500 |   |
| 1.18545600 |             |             |   |
| C          | -4.47623200 | 2.95816700  | - |
| 0.67297500 |             |             |   |
| C          | -4.85420600 | 2.88648900  | - |
| 2.02204500 |             |             |   |
| C          | -5.16559500 | 3.83705300  |   |
| 0.17567600 |             |             |   |
| C          | -5.89416700 | 3.67781100  | - |
| 2.51234100 |             |             |   |
| H          | -4.32516700 | 2.20459300  | - |
| 2.68217900 |             |             |   |

|            |             |             |   |
|------------|-------------|-------------|---|
| C          | -6.20456100 | 4.62994100  | - |
| 0.31418900 |             |             |   |
| H          | -4.88093000 | 3.89168800  |   |
| 1.22277700 |             |             |   |
| C          | -6.57158500 | 4.55263500  | - |
| 1.65977300 |             |             |   |
| H          | -6.17289900 | 3.61275100  | - |
| 3.56081000 |             |             |   |
| H          | -6.73057700 | 5.30397700  |   |
| 0.35678000 |             |             |   |
| H          | -7.38117900 | 5.16916500  | - |
| 2.04105800 |             |             |   |
| C          | 2.16889600  | 4.09931400  |   |
| 1.11653100 |             |             |   |
| C          | 2.09198100  | 4.95629900  |   |
| 2.22402900 |             |             |   |
| C          | 3.06779800  | 4.40628900  |   |
| 0.08330800 |             |             |   |
| C          | 2.89761800  | 6.09379100  |   |
| 2.29959400 |             |             |   |
| H          | 1.39595400  | 4.72308400  |   |
| 3.02517900 |             |             |   |
| C          | 3.87457600  | 5.54235400  |   |
| 0.16036200 |             |             |   |
| H          | 3.12336800  | 3.74694800  | - |
| 0.77788100 |             |             |   |
| C          | 3.79193600  | 6.38947600  |   |
| 1.26820600 |             |             |   |
| H          | 2.82890800  | 6.74649500  |   |
| 3.16590800 |             |             |   |
| H          | 4.56505600  | 5.76842700  | - |
| 0.64818100 |             |             |   |
| H          | 4.41994500  | 7.27444300  |   |
| 1.32727800 |             |             |   |
| C          | 4.77587000  | -0.69859300 |   |
| 1.01288100 |             |             |   |
| C          | 5.90645800  | -0.31154600 |   |
| 1.75263900 |             |             |   |
| C          | 4.89125100  | -1.77765300 |   |
| 0.11547300 |             |             |   |
| C          | 7.11635900  | -0.98856400 |   |
| 1.60783000 |             |             |   |
| H          | 5.82144900  | 0.51552900  |   |
| 2.45247500 |             |             |   |

|                |             |             |   |
|----------------|-------------|-------------|---|
| C              | 6.10241500  | -2.45453700 | - |
| 0.02335900     |             |             |   |
| H              | 4.03649200  | -2.06247900 | - |
| 0.49049600     |             |             |   |
| C              | 7.21797600  | -2.06517800 |   |
| 0.72177700     |             |             |   |
| H              | 7.97981300  | -0.68042300 |   |
| 2.19181700     |             |             |   |
| H              | 6.16968400  | -3.28126200 | - |
| 0.72490400     |             |             |   |
| H              | 8.16125700  | -2.59386000 |   |
| 0.61200300     |             |             |   |
| <b>oss-TS9</b> |             |             |   |
| Fe             | -0.72756600 | 0.10769300  |   |
| 0.62092900     |             |             |   |
| N              | -2.71258200 | -0.17019600 |   |
| 0.46415300     |             |             |   |
| C              | 1.87938300  | -1.90458900 |   |
| 1.36772700     |             |             |   |
| C              | -2.90618500 | -2.57510200 |   |
| 0.99724900     |             |             |   |
| C              | -0.98589800 | -4.01131000 |   |
| 1.73979900     |             |             |   |
| C              | 0.36044600  | -3.82408100 |   |
| 1.81742600     |             |             |   |
| C              | -1.55852400 | -2.75557000 |   |
| 1.31628100     |             |             |   |
| C              | 0.61153900  | -2.45383300 |   |
| 1.46321900     |             |             |   |
| H              | 2.72323400  | -2.57139200 |   |
| 1.50024700     |             |             |   |
| H              | 1.12617200  | -4.53610100 |   |
| 2.09848600     |             |             |   |
| H              | -1.54944000 | -4.90970200 |   |
| 1.94358500     |             |             |   |
| N              | -1.00495200 | 2.09064300  |   |
| 0.62462000     |             |             |   |
| N              | -0.56918400 | -1.79771800 |   |
| 1.19979600     |             |             |   |
| N              | 1.18733400  | 0.42347000  |   |
| 1.11760600     |             |             |   |
| C              | -3.34917200 | 2.12861900  | - |
| 0.17959100     |             |             |   |



|            |             |             |   |
|------------|-------------|-------------|---|
| C          | 1.30283600  | 2.88284200  |   |
| 1.06393700 |             |             |   |
| C          | 3.29738600  | 1.36494500  |   |
| 1.21327600 |             |             |   |
| C          | -4.77726300 | -1.15492700 |   |
| 0.10923800 |             |             |   |
| C          | -0.62384900 | 4.36978500  |   |
| 0.50044100 |             |             |   |
| C          | 3.47699900  | 0.01125200  |   |
| 1.15935500 |             |             |   |
| C          | -4.89029100 | 0.15260100  | - |
| 0.24797100 |             |             |   |
| C          | -1.90442400 | 4.15686600  |   |
| 0.09523000 |             |             |   |
| C          | 1.88058200  | 1.61493600  |   |
| 1.14834900 |             |             |   |
| C          | -3.42002100 | -1.35117100 |   |
| 0.55707300 |             |             |   |
| C          | -0.05674500 | 3.07924800  |   |
| 0.80103900 |             |             |   |
| C          | 2.14343000  | -0.56311200 |   |
| 1.16516200 |             |             |   |
| C          | -3.60349300 | 0.76316300  | - |
| 0.01782500 |             |             |   |
| C          | -2.14287900 | 2.73704600  |   |
| 0.17644800 |             |             |   |
| H          | -5.76425200 | 0.66946000  | - |
| 0.61643800 |             |             |   |
| H          | -2.62720900 | 4.88821000  | - |
| 0.23497700 |             |             |   |
| H          | 4.06427600  | 2.12508600  |   |
| 1.22034200 |             |             |   |
| H          | -5.53685100 | -1.92210800 |   |
| 0.07890200 |             |             |   |
| H          | -0.09140100 | 5.30741400  |   |
| 0.56143100 |             |             |   |
| N          | -0.43137100 | -0.03576200 | - |
| 1.15392500 |             |             |   |
| C          | 0.67465800  | 0.59144200  | - |
| 1.71923400 |             |             |   |
| C          | 0.48114800  | 1.90393700  | - |
| 2.21652900 |             |             |   |
| C          | 2.87110400  | 0.61042600  | - |
| 2.41380200 |             |             |   |

|            |             |             |   |
|------------|-------------|-------------|---|
| C          | 1.54983900  | 2.56322400  | - |
| 2.80724900 |             |             |   |
| H          | -0.49044200 | 2.37288100  | - |
| 2.11170700 |             |             |   |
| C          | 2.78240300  | 1.90923000  | - |
| 2.91520900 |             |             |   |
| H          | 3.80586700  | 0.05382100  | - |
| 2.47558100 |             |             |   |
| H          | 1.42317400  | 3.57645500  | - |
| 3.18022700 |             |             |   |
| H          | 3.64324100  | 2.38655800  | - |
| 3.37342200 |             |             |   |
| N          | 1.86199400  | -0.03805800 | - |
| 1.82580200 |             |             |   |
| C          | 3.36060500  | -4.84009100 | - |
| 1.45449600 |             |             |   |
| C          | 4.21460500  | -4.42994800 | - |
| 2.48297600 |             |             |   |
| C          | 3.80876000  | -3.41576200 | - |
| 3.35837100 |             |             |   |
| C          | 2.56119300  | -2.81810100 | - |
| 3.21339000 |             |             |   |
| C          | 1.69034100  | -3.22381400 | - |
| 2.17751800 |             |             |   |
| C          | 2.10910100  | -4.24916100 | - |
| 1.30156300 |             |             |   |
| H          | 3.67196300  | -5.62401300 | - |
| 0.76922500 |             |             |   |
| H          | 5.18826800  | -4.89741700 | - |
| 2.60354300 |             |             |   |
| H          | 4.47116200  | -3.08927700 | - |
| 4.15566900 |             |             |   |
| H          | 2.24880800  | -2.01895100 | - |
| 3.87590900 |             |             |   |
| H          | 1.44059200  | -4.56331500 | - |
| 0.50762400 |             |             |   |
| C          | 0.41690600  | -2.62604100 | - |
| 2.02183700 |             |             |   |
| C          | -0.63291200 | -2.00365700 | - |
| 1.84042700 |             |             |   |
| H          | -1.69703300 | -1.91130100 | - |
| 1.82309600 |             |             |   |
| C          | -3.82504100 | -3.74955700 |   |
| 1.07157000 |             |             |   |

|            |             |             |   |
|------------|-------------|-------------|---|
| C          | -4.88475700 | -3.77537000 |   |
| 1.99081500 |             |             |   |
| C          | -3.64857800 | -4.84564700 |   |
| 0.21241900 |             |             |   |
| C          | -5.74567200 | -4.87207100 |   |
| 2.05209700 |             |             |   |
| H          | -5.02596700 | -2.92934700 |   |
| 2.65759600 |             |             |   |
| C          | -4.50973800 | -5.94182500 |   |
| 0.27301000 |             |             |   |
| H          | -2.83162200 | -4.82699400 | - |
| 0.50372200 |             |             |   |
| C          | -5.56050200 | -5.95821100 |   |
| 1.19347100 |             |             |   |
| H          | -6.55880800 | -4.87917200 |   |
| 2.77309800 |             |             |   |
| H          | -4.36251100 | -6.78068100 | - |
| 0.40207400 |             |             |   |
| H          | -6.23127800 | -6.81184800 |   |
| 1.24090800 |             |             |   |
| C          | -4.44625800 | 2.98406200  | - |
| 0.72786800 |             |             |   |
| C          | -4.81559400 | 2.87651700  | - |
| 2.07691200 |             |             |   |
| C          | -5.12974500 | 3.89609800  |   |
| 0.08981600 |             |             |   |
| C          | -5.84228300 | 3.66573800  | - |
| 2.59756600 |             |             |   |
| H          | -4.29020500 | 2.16921000  | - |
| 2.71272400 |             |             |   |
| C          | -6.15582200 | 4.68638200  | - |
| 0.43058900 |             |             |   |
| H          | -4.85118900 | 3.97863000  |   |
| 1.13673800 |             |             |   |
| C          | -6.51460700 | 4.57345800  | - |
| 1.77585900 |             |             |   |
| H          | -6.11468100 | 3.57319100  | - |
| 3.64559400 |             |             |   |
| H          | -6.67793500 | 5.38644100  |   |
| 0.21630900 |             |             |   |
| H          | -7.31395900 | 5.18814900  | - |
| 2.18093200 |             |             |   |
| C          | 2.18551000  | 4.08484300  |   |
| 1.15942700 |             |             |   |

|            |            |             |   |
|------------|------------|-------------|---|
| C          | 2.09996600 | 4.94627000  |   |
| 2.26259800 |            |             |   |
| C          | 3.10123900 | 4.37931400  |   |
| 0.13747000 |            |             |   |
| C          | 2.91566800 | 6.07610400  |   |
| 2.34599800 |            |             |   |
| H          | 1.38986400 | 4.72297100  |   |
| 3.05418500 |            |             |   |
| C          | 3.91753700 | 5.50794300  |   |
| 0.22244900 |            |             |   |
| H          | 3.16188200 | 3.71704400  | - |
| 0.72114600 |            |             |   |
| C          | 3.82738900 | 6.35934600  |   |
| 1.32648800 |            |             |   |
| H          | 2.84073500 | 6.73266300  |   |
| 3.20884400 |            |             |   |
| H          | 4.62131000 | 5.72488700  | - |
| 0.57702700 |            |             |   |
| H          | 4.46301800 | 7.23841000  |   |
| 1.39159800 |            |             |   |
| C          | 4.74005300 | -0.72660700 |   |
| 1.03987800 |            |             |   |
| C          | 5.86227800 | -0.36326400 |   |
| 1.80395500 |            |             |   |
| C          | 4.86347800 | -1.77713300 |   |
| 0.11028800 |            |             |   |
| C          | 7.07320700 | -1.03667700 |   |
| 1.65202500 |            |             |   |
| H          | 5.76996400 | 0.44215500  |   |
| 2.52774400 |            |             |   |
| C          | 6.07635600 | -2.44973000 | - |
| 0.03597200 |            |             |   |
| H          | 4.01543600 | -2.04302500 | - |
| 0.51391900 |            |             |   |
| C          | 7.18353700 | -2.08480100 |   |
| 0.73353200 |            |             |   |
| H          | 7.93026600 | -0.74785000 |   |
| 2.25496100 |            |             |   |
| H          | 6.15061000 | -3.25398200 | - |
| 0.76198300 |            |             |   |
| H          | 8.12763100 | -2.61068600 |   |
| 0.61745000 |            |             |   |

**<sup>3</sup>TS9**

|            |             |             |   |
|------------|-------------|-------------|---|
| Fe         | 0.57510300  | 0.27609500  |   |
| 0.65029700 |             |             |   |
| N          | -1.32806000 | 0.48776800  |   |
| 1.23416500 |             |             |   |
| C          | 2.87389700  | -2.28068200 |   |
| 0.97833300 |             |             |   |
| C          | -1.96964300 | -1.89600900 |   |
| 1.24418400 |             |             |   |
| C          | -0.34961400 | -3.80030700 |   |
| 1.37819100 |             |             |   |
| C          | 1.00699900  | -3.89575700 |   |
| 1.39698600 |             |             |   |
| C          | -0.67066000 | -2.40329700 |   |
| 1.24890900 |             |             |   |
| C          | 1.52554800  | -2.56444600 |   |
| 1.20438400 |             |             |   |
| H          | 1.60895700  | -4.78590300 |   |
| 1.50238300 |             |             |   |
| H          | -1.07499600 | -4.59575600 |   |
| 1.46331900 |             |             |   |
| N          | 0.74400100  | 2.27192800  |   |
| 0.61008100 |             |             |   |
| N          | 0.48659200  | -1.65347600 |   |
| 1.15815800 |             |             |   |
| N          | 2.56911900  | 0.12654400  |   |
| 0.50440000 |             |             |   |
| C          | -1.54283700 | 2.94590800  |   |
| 1.26686600 |             |             |   |
| C          | 3.06909600  | 2.43502800  | - |
| 0.22508900 |             |             |   |
| C          | 4.72173000  | 0.54690600  | - |
| 0.23786900 |             |             |   |
| C          | -3.55210800 | -0.00160500 |   |
| 1.64277300 |             |             |   |
| C          | 1.51747400  | 4.38298600  |   |
| 0.05906600 |             |             |   |
| C          | 4.68261500  | -0.75220400 |   |
| 0.16214100 |             |             |   |
| C          | -3.41720900 | 1.34807500  |   |
| 1.73757400 |             |             |   |
| C          | 0.24625200  | 4.53132400  |   |
| 0.52145300 |             |             |   |
| C          | 3.40972300  | 1.09938300  | - |
| 0.00199600 |             |             |   |

|            |             |             |   |
|------------|-------------|-------------|---|
| C          | -2.24604600 | -0.53011700 |   |
| 1.33295800 |             |             |   |
| C          | 1.82473000  | 2.97511800  |   |
| 0.11684000 |             |             |   |
| C          | 3.33630900  | -1.01336700 |   |
| 0.61124400 |             |             |   |
| C          | -2.03886400 | 1.65205000  |   |
| 1.42986700 |             |             |   |
| C          | -0.23691300 | 3.21432700  |   |
| 0.85081700 |             |             |   |
| H          | 5.47913000  | -1.48128200 |   |
| 0.13781300 |             |             |   |
| H          | -4.17333700 | 2.08078300  |   |
| 1.97898800 |             |             |   |
| H          | -0.32406900 | 5.44271700  |   |
| 0.62572000 |             |             |   |
| H          | 5.55923900  | 1.09131500  | - |
| 0.64838400 |             |             |   |
| H          | -4.43825000 | -0.60111900 |   |
| 1.79193200 |             |             |   |
| H          | 2.19810500  | 5.15132700  | - |
| 0.27718600 |             |             |   |
| N          | 0.20386900  | 0.03569600  | - |
| 1.06739900 |             |             |   |
| C          | 0.19446200  | -1.19478700 | - |
| 1.70419900 |             |             |   |
| C          | 1.42265700  | -1.73324000 | - |
| 2.15465900 |             |             |   |
| C          | -0.94858300 | -3.04270300 | - |
| 2.46294200 |             |             |   |
| C          | 1.42668500  | -2.98673900 | - |
| 2.75298100 |             |             |   |
| H          | 2.33352200  | -1.16515700 | - |
| 2.00496900 |             |             |   |
| C          | 0.21582200  | -3.66820800 | - |
| 2.91215100 |             |             |   |
| H          | -1.91700100 | -3.52954100 | - |
| 2.57413600 |             |             |   |
| H          | 2.36083800  | -3.42411800 | - |
| 3.09723000 |             |             |   |
| H          | 0.17199200  | -4.64911000 | - |
| 3.37536300 |             |             |   |
| N          | -0.97497200 | -1.84605600 | - |
| 1.87048300 |             |             |   |

|            |             |             |   |
|------------|-------------|-------------|---|
| C          | -5.77805200 | -0.23152800 | - |
| 1.82310000 |             |             |   |
| C          | -5.85554500 | -1.18896100 | - |
| 2.83912900 |             |             |   |
| C          | -4.73780700 | -1.43640600 | - |
| 3.64500500 |             |             |   |
| C          | -3.55307400 | -0.73652600 | - |
| 3.44051600 |             |             |   |
| C          | -3.46173600 | 0.22712300  | - |
| 2.41062200 |             |             |   |
| C          | -4.59788600 | 0.47446400  | - |
| 1.60927300 |             |             |   |
| H          | -6.63947900 | -0.04026200 | - |
| 1.18897400 |             |             |   |
| H          | -6.77870500 | -1.73855700 | - |
| 3.00226500 |             |             |   |
| H          | -4.79108500 | -2.18166200 | - |
| 4.43437400 |             |             |   |
| H          | -2.67731200 | -0.94010800 | - |
| 4.04629900 |             |             |   |
| H          | -4.52752200 | 1.19950700  | - |
| 0.80674000 |             |             |   |
| C          | -2.25242800 | 0.92235400  | - |
| 2.17757100 |             |             |   |
| C          | -1.13152000 | 1.36584300  | - |
| 1.90722300 |             |             |   |
| H          | -0.41804200 | 2.16022800  | - |
| 1.84713500 |             |             |   |
| C          | 4.09487800  | 3.35267900  | - |
| 0.80764800 |             |             |   |
| C          | 3.91695300  | 3.88317800  | - |
| 2.09432300 |             |             |   |
| C          | 5.24108600  | 3.71124400  | - |
| 0.08226200 |             |             |   |
| C          | 4.86473600  | 4.74695800  | - |
| 2.64498800 |             |             |   |
| H          | 3.02967900  | 3.61069700  | - |
| 2.65907400 |             |             |   |
| C          | 6.18940400  | 4.57491100  | - |
| 0.63235400 |             |             |   |
| H          | 5.38018400  | 3.30938300  |   |
| 0.91745400 |             |             |   |
| C          | 6.00411400  | 5.09470200  | - |
| 1.91558900 |             |             |   |

|            |             |             |   |
|------------|-------------|-------------|---|
| H          | 4.71406700  | 5.14579800  | - |
| 3.64465300 |             |             |   |
| H          | 7.07015600  | 4.84567800  | - |
| 0.05605000 |             |             |   |
| H          | 6.74223500  | 5.76753000  | - |
| 2.34380500 |             |             |   |
| C          | -2.48403800 | 4.09520300  |   |
| 1.42813200 |             |             |   |
| C          | -2.37154900 | 4.97477900  |   |
| 2.51360300 |             |             |   |
| C          | -3.49061600 | 4.31605000  |   |
| 0.47528100 |             |             |   |
| C          | -3.25260800 | 6.04951300  |   |
| 2.64885800 |             |             |   |
| H          | -1.59102200 | 4.80856000  |   |
| 3.25099800 |             |             |   |
| C          | -4.37072200 | 5.39027600  |   |
| 0.61028500 |             |             |   |
| H          | -3.56637000 | 3.64270200  | - |
| 0.37444500 |             |             |   |
| C          | -4.25458200 | 6.25895400  |   |
| 1.69857900 |             |             |   |
| H          | -3.15725500 | 6.72130100  |   |
| 3.49782600 |             |             |   |
| H          | -5.14350600 | 5.55154200  | - |
| 0.13670300 |             |             |   |
| H          | -4.93996100 | 7.09565000  |   |
| 1.80423800 |             |             |   |
| C          | -3.12607100 | -2.83190400 |   |
| 1.12376300 |             |             |   |
| C          | -3.85916600 | -2.83416600 | - |
| 0.07397200 |             |             |   |
| C          | -3.50951900 | -3.69085000 |   |
| 2.16288000 |             |             |   |
| C          | -4.95338400 | -3.68596100 | - |
| 0.22641700 |             |             |   |
| H          | -3.55639600 | -2.16981100 | - |
| 0.87664800 |             |             |   |
| C          | -4.60418000 | -4.54384300 |   |
| 2.00639200 |             |             |   |
| H          | -2.95034600 | -3.68111500 |   |
| 3.09466200 |             |             |   |
| C          | -5.32796800 | -4.54342500 |   |
| 0.81135900 |             |             |   |



|                        |             |             |   |
|------------------------|-------------|-------------|---|
| H                      | -5.51186400 | -3.67059700 | - |
| 1.15817700             |             |             |   |
| H                      | -4.89498700 | -5.20281700 |   |
| 2.82040900             |             |             |   |
| H                      | -6.18131300 | -5.20606900 |   |
| 0.69196500             |             |             |   |
| C                      | 3.86186600  | -3.40141300 |   |
| 1.01883200             |             |             |   |
| C                      | 4.84492200  | -3.45189500 |   |
| 2.01757200             |             |             |   |
| C                      | 3.83690400  | -4.40887300 |   |
| 0.04181100             |             |             |   |
| C                      | 5.77883300  | -4.48920400 |   |
| 2.04331700             |             |             |   |
| H                      | 4.87064700  | -2.67182800 |   |
| 2.77345300             |             |             |   |
| C                      | 4.76988600  | -5.44602000 |   |
| 0.06773600             |             |             |   |
| H                      | 3.07895400  | -4.36732200 | - |
| 0.73541900             |             |             |   |
| C                      | 5.74345800  | -5.48923000 |   |
| 1.06891900             |             |             |   |
| H                      | 6.53198800  | -4.51710400 |   |
| 2.82633000             |             |             |   |
| H                      | 4.73946300  | -6.21805300 | - |
| 0.69675600             |             |             |   |
| H                      | 6.47046000  | -6.29669500 |   |
| 1.08895300             |             |             |   |
| <b><sup>5</sup>TS9</b> |             |             |   |
| Fe                     | 0.57977700  | 0.24128200  |   |
| 0.41101400             |             |             |   |
| N                      | 1.04874300  | 2.27844500  |   |
| 0.51745700             |             |             |   |
| C                      | -2.16987300 | -1.55800500 |   |
| 1.43786600             |             |             |   |
| C                      | -1.19495600 | 3.20481100  |   |
| 1.01807000             |             |             |   |
| C                      | -3.24460800 | 1.87743200  |   |
| 1.67091400             |             |             |   |
| C                      | -3.52468200 | 0.54572700  |   |
| 1.74403400             |             |             |   |
| C                      | -1.85087400 | 1.99491000  |   |
| 1.29588100             |             |             |   |

|            |             |             |   |
|------------|-------------|-------------|---|
| C          | -2.29768600 | -0.15938400 |   |
| 1.44721700 |             |             |   |
| H          | -4.46469000 | 0.07365200  |   |
| 1.99133200 |             |             |   |
| H          | -3.91252900 | 2.70806300  |   |
| 1.84912100 |             |             |   |
| N          | 2.64343500  | -0.14876300 |   |
| 0.51691200 |             |             |   |
| N          | -1.29370200 | 0.74336300  |   |
| 1.20735700 |             |             |   |
| N          | 0.28778600  | -1.68861600 |   |
| 1.17006000 |             |             |   |
| C          | 3.45866900  | 2.12469400  | - |
| 0.04858400 |             |             |   |
| C          | 2.56632200  | -2.60452800 |   |
| 0.84589300 |             |             |   |
| C          | 0.50477100  | -3.97494500 |   |
| 1.35347200 |             |             |   |
| C          | 0.83103700  | 4.56822800  |   |
| 0.38157600 |             |             |   |
| C          | 4.60833500  | -1.29328100 |   |
| 0.14493400 |             |             |   |
| C          | -0.82169600 | -3.68680200 |   |
| 1.46439100 |             |             |   |
| C          | 2.12750100  | 4.26783800  |   |
| 0.08589400 |             |             |   |
| C          | 4.85205100  | 0.01984200  | - |
| 0.12101500 |             |             |   |
| C          | 1.19454800  | -2.72348600 |   |
| 1.12842900 |             |             |   |
| C          | 0.15957800  | 3.32070200  |   |
| 0.66215700 |             |             |   |
| C          | 3.22161500  | -1.39597400 |   |
| 0.54456500 |             |             |   |
| C          | -0.95403700 | -2.25288200 |   |
| 1.35845700 |             |             |   |
| C          | 2.26006400  | 2.83095400  |   |
| 0.16673900 |             |             |   |
| C          | 3.61989400  | 0.73824500  |   |
| 0.11985200 |             |             |   |
| H          | -1.63909400 | -4.37616500 |   |
| 1.61780900 |             |             |   |
| H          | 2.92619600  | 4.95444300  | - |
| 0.15392700 |             |             |   |

|            |             |             |   |
|------------|-------------|-------------|---|
| H          | 5.77722100  | 0.46445200  | - |
| 0.45734800 |             |             |   |
| H          | 0.97548100  | -4.94551400 |   |
| 1.40513200 |             |             |   |
| H          | 0.37018000  | 5.54465400  |   |
| 0.41954500 |             |             |   |
| H          | 5.29713600  | -2.12163800 |   |
| 0.06649100 |             |             |   |
| N          | 0.20937500  | -0.10147300 | - |
| 1.35501500 |             |             |   |
| C          | 0.00450300  | -1.34005000 | - |
| 1.90245700 |             |             |   |
| C          | 1.11658300  | -2.03427000 | - |
| 2.44347400 |             |             |   |
| C          | -1.37252600 | -3.14135400 | - |
| 2.31617300 |             |             |   |
| C          | 0.94667900  | -3.34080900 | - |
| 2.88586500 |             |             |   |
| H          | 2.08115300  | -1.53912500 | - |
| 2.46673700 |             |             |   |
| C          | -0.32426400 | -3.91797500 | - |
| 2.82342200 |             |             |   |
| H          | -2.38322000 | -3.54615500 | - |
| 2.26665400 |             |             |   |
| H          | 1.79145800  | -3.89689400 | - |
| 3.28500200 |             |             |   |
| H          | -0.50564300 | -4.93248300 | - |
| 3.16449200 |             |             |   |
| N          | -1.23181000 | -1.89930300 | - |
| 1.85698900 |             |             |   |
| C          | -5.78103500 | 0.33490100  | - |
| 1.58867600 |             |             |   |
| C          | -6.05533900 | -0.69493100 | - |
| 2.49330400 |             |             |   |
| C          | -5.05104100 | -1.14990500 | - |
| 3.35610300 |             |             |   |
| C          | -3.78274400 | -0.57995800 | - |
| 3.32069000 |             |             |   |
| C          | -3.49524100 | 0.45751300  | - |
| 2.40605900 |             |             |   |
| C          | -4.51496300 | 0.91093500  | - |
| 1.54249200 |             |             |   |
| H          | -6.55367900 | 0.68327500  | - |
| 0.90910000 |             |             |   |

|            |             |             |   |
|------------|-------------|-------------|---|
| H          | -7.04479500 | -1.14300300 | - |
| 2.52492100 |             |             |   |
| H          | -5.25926300 | -1.95377400 | - |
| 4.05703200 |             |             |   |
| H          | -2.99383800 | -0.94031200 | - |
| 3.97102100 |             |             |   |
| H          | -4.29106800 | 1.69196100  | - |
| 0.82579500 |             |             |   |
| C          | -2.20188900 | 1.02839600  | - |
| 2.34841300 |             |             |   |
| C          | -1.03376300 | 1.39737600  | - |
| 2.24031500 |             |             |   |
| H          | -0.20147800 | 2.06336100  | - |
| 2.30165700 |             |             |   |
| C          | -2.01649700 | 4.45383000  |   |
| 1.05376100 |             |             |   |
| C          | -2.97286900 | 4.68867800  |   |
| 0.05358100 |             |             |   |
| C          | -1.85332400 | 5.40445100  |   |
| 2.07126600 |             |             |   |
| C          | -3.75120200 | 5.84667800  |   |
| 0.07309200 |             |             |   |
| H          | -3.08985700 | 3.95882900  | - |
| 0.74320300 |             |             |   |
| C          | -2.63180600 | 6.56332100  |   |
| 2.09101500 |             |             |   |
| H          | -1.11467500 | 5.22586400  |   |
| 2.84777000 |             |             |   |
| C          | -3.58313500 | 6.78675500  |   |
| 1.09294500 |             |             |   |
| H          | -4.48535300 | 6.01648600  | - |
| 0.71016400 |             |             |   |
| H          | -2.49744100 | 7.28940400  |   |
| 2.88848500 |             |             |   |
| H          | -4.18919100 | 7.68865200  |   |
| 1.10916200 |             |             |   |
| C          | 4.65497000  | 2.91624500  | - |
| 0.47106100 |             |             |   |
| C          | 4.68671800  | 3.54573800  | - |
| 1.72505200 |             |             |   |
| C          | 5.76547200  | 3.04911300  |   |
| 0.37675500 |             |             |   |
| C          | 5.80015500  | 4.28728200  | - |
| 2.12227600 |             |             |   |

|            |             |             |   |
|------------|-------------|-------------|---|
| H          | 3.83046600  | 3.44629400  | - |
| 2.38634500 |             |             |   |
| C          | 6.87950300  | 3.79032900  | - |
| 0.01958300 |             |             |   |
| H          | 5.74553100  | 2.56775200  |   |
| 1.35044900 |             |             |   |
| C          | 6.90024800  | 4.41158900  | - |
| 1.27051100 |             |             |   |
| H          | 5.80948500  | 4.76451900  | - |
| 3.09868800 |             |             |   |
| H          | 7.72915400  | 3.88639800  |   |
| 0.65129800 |             |             |   |
| H          | 7.76751200  | 4.98907500  | - |
| 1.57920400 |             |             |   |
| C          | 3.38245400  | -3.85703000 |   |
| 0.81383400 |             |             |   |
| C          | 4.40377200  | -4.07050800 |   |
| 1.75212600 |             |             |   |
| C          | 3.14861600  | -4.83852200 | - |
| 0.16223900 |             |             |   |
| C          | 5.17179200  | -5.23536000 |   |
| 1.71631700 |             |             |   |
| H          | 4.58897500  | -3.31513400 |   |
| 2.51069200 |             |             |   |
| C          | 3.91533500  | -6.00377300 | - |
| 0.19759300 |             |             |   |
| H          | 2.35917200  | -4.67647300 | - |
| 0.88995600 |             |             |   |
| C          | 4.92995700  | -6.20572700 |   |
| 0.74117500 |             |             |   |
| H          | 5.95607900  | -5.38643100 |   |
| 2.45340000 |             |             |   |
| H          | 3.72286300  | -6.75255400 | - |
| 0.96172900 |             |             |   |
| H          | 5.52756900  | -7.11295600 |   |
| 0.71339800 |             |             |   |
| C          | -3.43596000 | -2.35229800 |   |
| 1.44360500 |             |             |   |
| C          | -4.21957300 | -2.36644800 |   |
| 0.27849000 |             |             |   |
| C          | -3.86284800 | -3.07690200 |   |
| 2.56426700 |             |             |   |
| C          | -5.40887900 | -3.09441900 |   |
| 0.23962600 |             |             |   |

|                          |             |             |   |
|--------------------------|-------------|-------------|---|
| H                        | -3.88102000 | -1.80970500 | - |
| 0.58967700               |             |             |   |
| C                        | -5.05359100 | -3.80596300 |   |
| 2.52232200               |             |             |   |
| H                        | -3.25941700 | -3.06204400 |   |
| 3.46789900               |             |             |   |
| C                        | -5.82893000 | -3.81607600 |   |
| 1.36021700               |             |             |   |
| H                        | -6.00485000 | -3.09159300 | - |
| 0.66893200               |             |             |   |
| H                        | -5.37722300 | -4.36126100 |   |
| 3.39887900               |             |             |   |
| H                        | -6.75617600 | -4.38248900 |   |
| 1.32962400               |             |             |   |
| <b><sup>3</sup>INT10</b> |             |             |   |
| Fe                       | 0.52973100  | 0.21731900  |   |
| 0.74118800               |             |             |   |
| N                        | -1.06177000 | 1.30866800  |   |
| 1.28754700               |             |             |   |
| C                        | 1.41785300  | -3.08299800 |   |
| 1.27415000               |             |             |   |
| C                        | -2.71079200 | -0.51842900 |   |
| 1.45408200               |             |             |   |
| C                        | -2.12053900 | -2.91470700 |   |
| 1.84755800               |             |             |   |
| C                        | -0.95882600 | -3.62066500 |   |
| 1.87323000               |             |             |   |
| C                        | -1.77602600 | -1.55275500 |   |
| 1.52736800               |             |             |   |
| C                        | 0.09711000  | -2.70284400 |   |
| 1.51833300               |             |             |   |
| H                        | -0.81956500 | -4.66725300 |   |
| 2.09961500               |             |             |   |
| H                        | -3.12204400 | -3.26437700 |   |
| 2.05234100               |             |             |   |
| N                        | 1.58157300  | 1.90546300  |   |
| 0.56209800               |             |             |   |
| N                        | -0.41546700 | -1.43006600 |   |
| 1.35742300               |             |             |   |
| N                        | 2.22733000  | -0.83640000 |   |
| 0.62431300               |             |             |   |
| C                        | -0.12344500 | 3.59149600  |   |
| 1.17161600               |             |             |   |

|            |             |             |   |
|------------|-------------|-------------|---|
| C          | 3.70431500  | 0.93874900  | - |
| 0.26300900 |             |             |   |
| C          | 4.29702200  | -1.49901800 | - |
| 0.17357200 |             |             |   |
| C          | -3.28081400 | 1.92125100  |   |
| 1.53662000 |             |             |   |
| C          | 3.25406500  | 3.39297700  | - |
| 0.02821500 |             |             |   |
| C          | 3.68392200  | -2.60843200 |   |
| 0.32168200 |             |             |   |
| C          | -2.54637100 | 3.06575800  |   |
| 1.55152100 |             |             |   |
| C          | 2.20897600  | 4.13153100  |   |
| 0.43107200 |             |             |   |
| C          | 3.39905400  | -0.39118200 |   |
| 0.04052200 |             |             |   |
| C          | -2.35025000 | 0.82804900  |   |
| 1.40008500 |             |             |   |
| C          | 2.86086000  | 2.00729200  |   |
| 0.05704200 |             |             |   |
| C          | 2.39151800  | -2.19415700 |   |
| 0.80632800 |             |             |   |
| C          | -1.16964800 | 2.68320700  |   |
| 1.35333000 |             |             |   |
| C          | 1.16132900  | 3.20386100  |   |
| 0.78032100 |             |             |   |
| H          | 4.05518000  | -3.62250100 |   |
| 0.33805500 |             |             |   |
| H          | -2.89711300 | 4.08076800  |   |
| 1.66523900 |             |             |   |
| H          | 2.13749000  | 5.20571800  |   |
| 0.51825700 |             |             |   |
| H          | 5.27067500  | -1.42874200 | - |
| 0.63545600 |             |             |   |
| H          | -4.35076700 | 1.81455700  |   |
| 1.63906600 |             |             |   |
| H          | 4.21463100  | 3.74253700  | - |
| 0.37721000 |             |             |   |
| N          | -0.00441800 | 0.07709000  | - |
| 1.02065000 |             |             |   |
| C          | -0.25913000 | -1.22018800 | - |
| 1.53575300 |             |             |   |
| C          | 0.82897200  | -1.98331400 | - |
| 1.98614200 |             |             |   |

|            |             |             |   |
|------------|-------------|-------------|---|
| C          | -1.73196600 | -2.90494700 | - |
| 2.04461800 |             |             |   |
| C          | 0.59388000  | -3.26581300 | - |
| 2.47160900 |             |             |   |
| H          | 1.82691600  | -1.56482500 | - |
| 1.93969300 |             |             |   |
| C          | -0.71686300 | -3.74626300 | - |
| 2.50282400 |             |             |   |
| H          | -2.76930800 | -3.23639600 | - |
| 2.05428600 |             |             |   |
| H          | 1.42154000  | -3.87923900 | - |
| 2.81743600 |             |             |   |
| H          | -0.94992900 | -4.73981400 | - |
| 2.87402100 |             |             |   |
| N          | -1.52090400 | -1.67384200 | - |
| 1.56915900 |             |             |   |
| C          | -5.10511100 | 0.08142000  | - |
| 3.19939500 |             |             |   |
| C          | -5.03942700 | -0.21515300 | - |
| 4.56966000 |             |             |   |
| C          | -3.82939300 | -0.04735800 | - |
| 5.25833100 |             |             |   |
| C          | -2.69618300 | 0.40693100  | - |
| 4.59769800 |             |             |   |
| C          | -2.73839200 | 0.70101600  | - |
| 3.20359100 |             |             |   |
| C          | -3.98435000 | 0.53698700  | - |
| 2.52346800 |             |             |   |
| H          | -6.03733300 | -0.05226900 | - |
| 2.65579400 |             |             |   |
| H          | -5.92124600 | -0.57152700 | - |
| 5.09502800 |             |             |   |
| H          | -3.77538300 | -0.27756600 | - |
| 6.31954800 |             |             |   |
| H          | -1.75694300 | 0.52945200  | - |
| 5.12882400 |             |             |   |
| H          | -4.02511800 | 0.75567400  | - |
| 1.46176200 |             |             |   |
| C          | -1.62866500 | 1.14876000  | - |
| 2.50152900 |             |             |   |
| C          | -0.65752900 | 1.17319800  | - |
| 1.60734300 |             |             |   |
| H          | -0.24353000 | 2.12392600  | - |
| 1.27687600 |             |             |   |



|            |             |            |   |
|------------|-------------|------------|---|
| C          | 5.01764100  | 1.25171100 | - |
| 0.90241000 |             |            |   |
| C          | 5.05808300  | 1.78176700 | - |
| 2.20122300 |             |            |   |
| C          | 6.22655100  | 1.04103400 | - |
| 0.22159900 |             |            |   |
| C          | 6.27750300  | 2.08692800 | - |
| 2.80729800 |             |            |   |
| H          | 4.12456000  | 1.95075400 | - |
| 2.73072100 |             |            |   |
| C          | 7.44620900  | 1.34666000 | - |
| 0.82703200 |             |            |   |
| H          | 6.20113400  | 0.64031400 |   |
| 0.78783400 |             |            |   |
| C          | 7.47515300  | 1.86946200 | - |
| 2.12209200 |             |            |   |
| H          | 6.29157100  | 2.49251700 | - |
| 3.81545000 |             |            |   |
| H          | 8.37335400  | 1.18176900 | - |
| 0.28447900 |             |            |   |
| H          | 8.42488700  | 2.10775100 | - |
| 2.59337600 |             |            |   |
| C          | -0.40382600 | 5.05291600 |   |
| 1.31710900 |             |            |   |
| C          | 0.11969600  | 5.77057700 |   |
| 2.40225700 |             |            |   |
| C          | -1.17838300 | 5.73317900 |   |
| 0.36552700 |             |            |   |
| C          | -0.12957100 | 7.13752400 |   |
| 2.53607300 |             |            |   |
| H          | 0.72306600  | 5.24852600 |   |
| 3.13983100 |             |            |   |
| C          | -1.42914200 | 7.09946500 |   |
| 0.49986000 |             |            |   |
| H          | -1.58069900 | 5.18174800 | - |
| 0.47982400 |             |            |   |
| C          | -0.90538500 | 7.80518500 |   |
| 1.58572900 |             |            |   |
| H          | 0.28018300  | 7.67960700 |   |
| 3.38422100 |             |            |   |
| H          | -2.02930200 | 7.61298300 | - |
| 0.24656900 |             |            |   |
| H          | -1.09974600 | 8.86925800 |   |
| 1.68992100 |             |            |   |

|            |             |             |   |
|------------|-------------|-------------|---|
| C          | -4.15784100 | -0.88664300 |   |
| 1.41697400 |             |             |   |
| C          | -4.66890200 | -1.47020700 |   |
| 0.24684900 |             |             |   |
| C          | -5.01657400 | -0.66589800 |   |
| 2.50220700 |             |             |   |
| C          | -6.01864400 | -1.81373500 |   |
| 0.16215900 |             |             |   |
| H          | -3.99772600 | -1.62116200 | - |
| 0.59271800 |             |             |   |
| C          | -6.36591200 | -1.01637400 |   |
| 2.41757400 |             |             |   |
| H          | -4.62062400 | -0.22172000 |   |
| 3.41142800 |             |             |   |
| C          | -6.87017300 | -1.58873300 |   |
| 1.24718600 |             |             |   |
| H          | -6.40389000 | -2.25469400 | - |
| 0.75369800 |             |             |   |
| H          | -7.02208600 | -0.84373800 |   |
| 3.26661300 |             |             |   |
| H          | -7.92105500 | -1.85816400 |   |
| 1.18197800 |             |             |   |
| C          | 1.78845400  | -4.52356700 |   |
| 1.40762400 |             |             |   |
| C          | 2.71086400  | -4.93837500 |   |
| 2.37945400 |             |             |   |
| C          | 1.23606800  | -5.48289700 |   |
| 0.54414700 |             |             |   |
| C          | 3.06888100  | -6.28289600 |   |
| 2.49090300 |             |             |   |
| H          | 3.14334400  | -4.19847700 |   |
| 3.04729800 |             |             |   |
| C          | 1.59494800  | -6.82664100 |   |
| 0.65550400 |             |             |   |
| H          | 0.53001200  | -5.16069000 | - |
| 0.21574300 |             |             |   |
| C          | 2.51154600  | -7.23071300 |   |
| 1.62947900 |             |             |   |
| H          | 3.78080800  | -6.58987400 |   |
| 3.25251100 |             |             |   |
| H          | 1.16179300  | -7.55799000 | - |
| 0.02198900 |             |             |   |
| H          | 2.79044600  | -8.27746600 |   |
| 1.71603400 |             |             |   |

**<sup>5</sup>INT10**

|            |             |             |   |
|------------|-------------|-------------|---|
| Fe         | 0.63272400  | 0.27496500  |   |
| 0.63999700 |             |             |   |
| N          | 0.60177300  | 2.27796100  |   |
| 0.66213300 |             |             |   |
| C          | -1.62423100 | -2.18954700 |   |
| 1.31647200 |             |             |   |
| C          | -1.69879200 | 2.67995500  |   |
| 1.49261800 |             |             |   |
| C          | -3.35863200 | 0.87330400  |   |
| 2.02599800 |             |             |   |
| C          | -3.35430300 | -0.48239900 |   |
| 1.90516800 |             |             |   |
| C          | -2.04675000 | 1.33407700  |   |
| 1.64000900 |             |             |   |
| C          | -2.02752200 | -0.86264700 |   |
| 1.49062600 |             |             |   |
| H          | -4.15888700 | -1.17528700 |   |
| 2.10400700 |             |             |   |
| H          | -4.17212600 | 1.51124800  |   |
| 2.33796700 |             |             |   |
| N          | 2.61844800  | 0.33895600  |   |
| 0.35809300 |             |             |   |
| N          | -1.23366200 | 0.25503000  |   |
| 1.36461400 |             |             |   |
| N          | 0.78177300  | -1.68808700 |   |
| 1.06506400 |             |             |   |
| C          | 2.84306600  | 2.71372900  | - |
| 0.29698200 |             |             |   |
| C          | 3.21573000  | -2.02905200 |   |
| 0.78880100 |             |             |   |
| C          | 1.55587400  | -3.85720500 |   |
| 1.23420600 |             |             |   |
| C          | -0.12662700 | 4.47006000  |   |
| 0.71102100 |             |             |   |
| C          | 4.79900200  | -0.29206800 | - |
| 0.07649600 |             |             |   |
| C          | 0.19626000  | -3.91337800 |   |
| 1.27177700 |             |             |   |
| C          | 1.12316900  | 4.47457900  |   |
| 0.17065100 |             |             |   |
| C          | 4.67885200  | 1.01088500  | - |
| 0.44900700 |             |             |   |

|            |             |             |   |
|------------|-------------|-------------|---|
| C          | 1.91611300  | -2.47370800 |   |
| 1.05205900 |             |             |   |
| C          | -0.45349000 | 3.09944400  |   |
| 1.01036500 |             |             |   |
| C          | 3.51081000  | -0.71210100 |   |
| 0.41815900 |             |             |   |
| C          | -0.28154100 | -2.55786600 |   |
| 1.20329300 |             |             |   |
| C          | 1.57491900  | 3.10796100  |   |
| 0.14273500 |             |             |   |
| C          | 3.32815900  | 1.41199700  | - |
| 0.14632300 |             |             |   |
| H          | -0.43172000 | -4.78681400 |   |
| 1.36453400 |             |             |   |
| H          | 1.69845800  | 5.32290000  | - |
| 0.16974500 |             |             |   |
| H          | 5.43392200  | 1.65137200  | - |
| 0.87995600 |             |             |   |
| H          | 2.25447600  | -4.67825000 |   |
| 1.29351800 |             |             |   |
| H          | -0.77879500 | 5.31303600  |   |
| 0.88551800 |             |             |   |
| H          | 5.66936600  | -0.92720200 | - |
| 0.15095400 |             |             |   |
| N          | -0.11004700 | 0.03083600  | - |
| 1.32927300 |             |             |   |
| C          | -0.06013700 | -1.26266600 | - |
| 1.83840800 |             |             |   |
| C          | 1.21423000  | -1.82193300 | - |
| 2.08370000 |             |             |   |
| C          | -1.09552900 | -3.19576900 | - |
| 2.54212400 |             |             |   |
| C          | 1.29558300  | -3.11506500 | - |
| 2.57688200 |             |             |   |
| H          | 2.09614400  | -1.22704300 | - |
| 1.87780300 |             |             |   |
| C          | 0.11587400  | -3.83197000 | - |
| 2.81056000 |             |             |   |
| H          | -2.03969600 | -3.71541800 | - |
| 2.69916500 |             |             |   |
| H          | 2.26555200  | -3.56020700 | - |
| 2.78382700 |             |             |   |
| H          | 0.13358500  | -4.84922300 | - |
| 3.18905100 |             |             |   |

|            |             |             |   |
|------------|-------------|-------------|---|
| N          | -1.19344400 | -1.94853100 | - |
| 2.07238300 |             |             |   |
| C          | -5.96145200 | -0.57110900 | - |
| 2.01457200 |             |             |   |
| C          | -6.25283700 | -0.63807200 | - |
| 3.38589600 |             |             |   |
| C          | -5.25652300 | -0.31086100 | - |
| 4.31912600 |             |             |   |
| C          | -3.99089600 | 0.07157500  | - |
| 3.90337000 |             |             |   |
| C          | -3.67071900 | 0.14223000  | - |
| 2.51019800 |             |             |   |
| C          | -4.70493500 | -0.18643800 | - |
| 1.57351500 |             |             |   |
| H          | -6.72771500 | -0.82314300 | - |
| 1.28508800 |             |             |   |
| H          | -7.24060700 | -0.93973100 | - |
| 3.72267600 |             |             |   |
| H          | -5.47610700 | -0.36209200 | - |
| 5.38291000 |             |             |   |
| H          | -3.21832700 | 0.31139900  | - |
| 4.62755900 |             |             |   |
| H          | -4.47884400 | -0.13393600 | - |
| 0.51368300 |             |             |   |
| C          | -2.41397200 | 0.48652500  | - |
| 2.07026300 |             |             |   |
| C          | -1.23204300 | 0.81413900  | - |
| 1.56816700 |             |             |   |
| H          | -1.06668500 | 1.85016500  | - |
| 1.26596300 |             |             |   |
| C          | -2.74020200 | 3.71695600  |   |
| 1.75963700 |             |             |   |
| C          | -3.86786500 | 3.81417700  |   |
| 0.92876800 |             |             |   |
| C          | -2.60555900 | 4.61584300  |   |
| 2.82769200 |             |             |   |
| C          | -4.84019600 | 4.78659300  |   |
| 1.16478700 |             |             |   |
| H          | -3.97232700 | 3.12225600  |   |
| 0.09719700 |             |             |   |
| C          | -3.57833100 | 5.58895300  |   |
| 3.06297400 |             |             |   |
| H          | -1.73404700 | 4.54424400  |   |
| 3.47261900 |             |             |   |

|            |             |             |   |
|------------|-------------|-------------|---|
| C          | -4.69802500 | 5.67641100  |   |
| 2.23253700 |             |             |   |
| H          | -5.70595700 | 4.85168500  |   |
| 0.51120400 |             |             |   |
| H          | -3.46286300 | 6.27584100  |   |
| 3.89721600 |             |             |   |
| H          | -5.45517800 | 6.43402800  |   |
| 2.41591600 |             |             |   |
| C          | 3.73279900  | 3.75377900  | - |
| 0.89647300 |             |             |   |
| C          | 3.42059800  | 4.31041900  | - |
| 2.14614200 |             |             |   |
| C          | 4.87936600  | 4.20322800  | - |
| 0.22405900 |             |             |   |
| C          | 4.23859700  | 5.28900000  | - |
| 2.71261900 |             |             |   |
| H          | 2.53250200  | 3.96716200  | - |
| 2.66941600 |             |             |   |
| C          | 5.69794200  | 5.18141300  | - |
| 0.79052400 |             |             |   |
| H          | 5.12089900  | 3.78212200  |   |
| 0.74787800 |             |             |   |
| C          | 5.38000600  | 5.72655200  | - |
| 2.03669300 |             |             |   |
| H          | 3.98537400  | 5.70710400  | - |
| 3.68322800 |             |             |   |
| H          | 6.58064200  | 5.52149300  | - |
| 0.25543900 |             |             |   |
| H          | 6.01699300  | 6.48862900  | - |
| 2.47753100 |             |             |   |
| C          | 4.33688600  | -3.01654900 |   |
| 0.81282200 |             |             |   |
| C          | 5.35563900  | -2.90977100 |   |
| 1.77165200 |             |             |   |
| C          | 4.40608700  | -4.05265600 | - |
| 0.13152500 |             |             |   |
| C          | 6.41449500  | -3.81887000 |   |
| 1.78925200 |             |             |   |
| H          | 5.30951100  | -2.10795200 |   |
| 2.50332400 |             |             |   |
| C          | 5.46378400  | -4.96245400 | - |
| 0.11398000 |             |             |   |
| H          | 3.62156400  | -4.13669400 | - |
| 0.87776700 |             |             |   |

|            |             |             |   |
|------------|-------------|-------------|---|
| C          | 6.47135600  | -4.84820500 |   |
| 0.84683900 |             |             |   |
| H          | 7.19312200  | -3.72453100 |   |
| 2.54150800 |             |             |   |
| H          | 5.50353000  | -5.75712800 | - |
| 0.85433200 |             |             |   |
| H          | 7.29570300  | -5.55605600 |   |
| 0.86038500 |             |             |   |
| C          | -2.69175600 | -3.22945300 |   |
| 1.24035800 |             |             |   |
| C          | -3.54463300 | -3.22707400 |   |
| 0.12377200 |             |             |   |
| C          | -2.88698300 | -4.18527400 |   |
| 2.24698400 |             |             |   |
| C          | -4.57088600 | -4.16601100 |   |
| 0.01938200 |             |             |   |
| H          | -3.38461000 | -2.49067500 | - |
| 0.65777300 |             |             |   |
| C          | -3.91229900 | -5.12718200 |   |
| 2.13740200 |             |             |   |
| H          | -2.23923800 | -4.17917500 |   |
| 3.11949300 |             |             |   |
| C          | -4.75650700 | -5.11937500 |   |
| 1.02428300 |             |             |   |
| H          | -5.22520200 | -4.14743100 | - |
| 0.84836000 |             |             |   |
| H          | -4.05673700 | -5.86066300 |   |
| 2.92637600 |             |             |   |
| H          | -5.55650800 | -5.85060200 |   |
| 0.94296100 |             |             |   |
